# Supplementary material for: Defining in vivo transcriptional responses to auxin
Source: Research Square preprint supplement (doi:10.21203/rs.3.rs-1927085/v1), 2022-08-11
Supplement: Supplementary file 1 [file 053883d16a069abec59276fc.xlsx]

## Sheet: Summary_FilteredPeaksGeneTarget
Supplementary Data 1 Summary of 18 ChIP-seq datasets with max peak scores
1=peak associated with the gene; 0=no peak associated.
Ypet indicates recombineering lines; Except for published ARF6 (45) and ARF5_DAP data (49) , other are Dexamethasone (Dex) inducible lines. Dex= 10 µM Dex treatment for 4 hours; IAA= 10 µM treatment for 4 hours.
MaxPeakScore refers to the maximum peak score for all peaks associated with one gene. NA = no peak associated.
GOauxin refers to the list of genes downloaded from Gene Ontology Consortium (90) when searched by the key word "auxin"
ar115 refers to the list of 115 known auxin response families from Bargmann 2013 (61).
AR3 refers to the list of genes identified by at least three out of four high-throughput datasets we collected from published papers. The four datasets include 785 auxin response genes from Nemhauser 2006(62), 940 auxin response genes from Okushima 2007 (re-organized by Bargmann 2013)(59), 1923 auxin response genes from Bargmann 2013(61), and 1879 IAA19ptoS auxin response genes from Bargmann 2009…
Citation number in () are the same as in the reference number of the article.
GeneID	IAA19Ypet	IAA19(msg2-1)	IAA19(msg2-1)mARF10_Dex	IAA19(msg2-1)mARF10_DIG	mARF10_Dex	mARF10_DIG	ARF6(45)	ARF5_DAP(49)	ARF5_Dex	ARF5_Dex_IAA	ARF5_∆C_Dex	ARF5_∆C_Dex_IAA	ARF7_ypet	ARF7_IAA	ARF7_Dex	ARF7_Dex_IAA	TCP	IAA12(bdl)	maxPeakScore_IAA19	maxPeakScore_IAA19ptoS	maxPeakScore_IAA19mARF10_Dex	maxPeakScore_IAA19mARF10_DIG	maxPeakScore_mARF10_Dex	maxPeakScore_mARF10_DIG	maxPeakScore_ARF6	maxPeakScore_ARF5_DAP	maxPeakScore_ARF5_I80_Dex	maxPeakScore_ARF5_I80_DIG	maxPeakScore_ARF5_I81_Dex	maxPeakScore_ARF5_I81_DIG	maxPeakScore_ARF7_ypet	maxPeakScore_ARF7_IAA	maxPeakScore_ARF7_Dex	maxPeakScore_ARF7_DIG	maxPeakScore_TCP	maxPeakScore_IAA12ptoS	ANNO	GOauxin	ar115	AR3
AT1G01010	0	1	1	1	1	0	0	1	0	0	0	0	1	0	0	0	0	1	NA	94.2	110.3	95.8	65.5	NA	NA	64.2	NA	NA	NA	NA	38.7	NA	NA	NA	NA	129.2	ANAC001|NAC domain containing protein 1|T25K16.1|T25K16_1	0	0	0
AT1G01020	0	0	0	0	0	0	1	0	0	0	0	0	0	0	0	0	0	0	NA	NA	NA	NA	NA	NA	45.2	NA	NA	NA	NA	NA	NA	NA	NA	NA	NA	NA	T25K16.2|T25K16_2	0	0	0
AT1G01030	0	1	1	1	0	1	0	1	1	0	1	0	0	0	0	0	1	1	NA	164.8	141.2	122.7	NA	137.5	NA	474.8	80.3	NA	133	NA	NA	NA	NA	NA	248.9	145.3	NGATHA3|T25K16.3|T25K16_3	0	0	0
AT1G01040	0	1	1	1	1	1	1	1	1	0	1	1	0	0	0	0	1	1	NA	187.7	224.1	230	148.3	166.9	92.5	135.6	81.5	NA	227.7	187.9	NA	NA	NA	NA	298.2	260.1	ABNORMAL SUSPENSOR 1|ASU1|ATDCL1|CAF|CARPEL FACTORY|DICER-LIKE 1|EMB60|EMB76|EMBRYO DEFECTIVE 60|EMBRYO DEFECTIVE 76|SHORT INTEGUMENTS 1|SIN1|SUS1|SUSPENSOR 1|T25K16.4|T25K16_4|dicer-like 1	0	0	1
AT1G01050	0	0	0	0	0	0	0	1	0	0	0	0	0	0	0	0	0	0	NA	NA	NA	NA	NA	NA	NA	306	NA	NA	NA	NA	NA	NA	NA	NA	NA	NA	AtPPa1|T25K16.5|T25K16_5|pyrophosphorylase 1	0	0	0
AT1G01060	0	1	1	1	1	1	1	0	1	0	1	1	0	0	0	0	1	1	NA	211.4	205.1	184.2	144.3	109.7	145.6	NA	103.2	NA	163.8	157.7	NA	NA	NA	NA	159	167.9	LATE ELONGATED HYPOCOTYL|LATE ELONGATED HYPOCOTYL 1|LHY1|T25K16.6|T25K16_6	1	0	0
AT1G01070	0	0	1	1	0	0	0	0	0	0	0	0	1	0	0	0	0	0	NA	NA	128.8	136.3	NA	NA	NA	NA	NA	NA	NA	NA	60.8	NA	NA	NA	NA	NA	T25K16.7|T25K16_7|Usually multiple acids move in and out Transporters 28	0	0	0
AT1G01073	0	0	0	0	0	0	0	1	0	0	0	0	0	0	0	0	0	0	NA	NA	NA	NA	NA	NA	NA	169.3	NA	NA	NA	NA	NA	NA	NA	NA	NA	NA	NoInfo	0	0	0
AT1G01100	0	0	1	1	0	0	0	1	0	0	0	0	0	0	0	0	1	1	NA	NA	134.4	133.2	NA	NA	NA	180.1	NA	NA	NA	NA	NA	NA	NA	NA	207.8	187.1	T25K16.9|T25K16_9	0	0	1
AT1G01110	0	0	0	0	0	0	0	1	0	0	0	0	0	0	0	0	0	0	NA	NA	NA	NA	NA	NA	NA	151.6	NA	NA	NA	NA	NA	NA	NA	NA	NA	NA	IQ-domain 18|T25K16.10|T25K16_10	0	0	0
AT1G01115	0	0	1	1	0	0	1	0	0	0	0	0	0	0	0	0	0	0	NA	NA	228.1	235.7	NA	NA	106.2	NA	NA	NA	NA	NA	NA	NA	NA	NA	NA	NA	NoInfo	0	0	0
AT1G01120	0	0	0	0	0	0	0	1	0	0	0	0	0	0	0	0	0	0	NA	NA	NA	NA	NA	NA	NA	345.4	NA	NA	NA	NA	NA	NA	NA	NA	NA	NA	3-ketoacyl-CoA synthase 1|T25K16.11|T25K16_11	0	0	0
AT1G01140	1	0	1	1	1	0	1	1	0	0	1	1	0	0	0	0	1	1	151.9	NA	216.1	228.7	112.9	NA	122	706.1	NA	NA	153.4	142.9	NA	NA	NA	NA	128.1	185.8	CBL-interacting protein kinase 9|F6F3.28|PKS6|PROTEIN KINASE 6|SNF1-RELATED PROTEIN KINASE 3.12|SnRK3.12	0	0	1
AT1G01170	0	0	1	1	0	0	0	0	0	0	0	0	0	0	0	0	0	0	NA	NA	159.2	156.8	NA	NA	NA	NA	NA	NA	NA	NA	NA	NA	NA	NA	NA	NA	F6F3.32	0	0	0
AT1G01183	0	0	0	0	0	0	0	1	0	0	0	0	0	0	0	0	0	0	NA	NA	NA	NA	NA	NA	NA	204.8	NA	NA	NA	NA	NA	NA	NA	NA	NA	NA	MICRORNA 165|MIR165|MIR165A|microRNA165A|p_MI0000199	0	0	0
AT1G01190	0	0	1	1	0	0	0	0	0	0	0	0	0	0	0	0	0	0	NA	NA	233.7	201.5	NA	NA	NA	NA	NA	NA	NA	NA	NA	NA	NA	NA	NA	NA	''cytochrome P450|F6F3.25|cytochrome P450|family 78|polypeptide 8|polypeptide 8''|subfamily A	0	0	0
AT1G01210	1	0	1	0	1	0	0	1	0	0	1	1	0	0	0	0	0	1	123.3	NA	93.5	NA	109.2	NA	NA	295.7	NA	NA	149.6	138.7	NA	NA	NA	NA	NA	128.5	F6F3.2|F6F3_2	0	0	0
AT1G01220	0	0	0	0	0	0	0	1	0	0	0	0	0	0	0	0	0	0	NA	NA	NA	NA	NA	NA	NA	291.7	NA	NA	NA	NA	NA	NA	NA	NA	NA	NA	Arabidopsis thaliana L-fucokinase/GDP-L-fucose pyrophosphorylase|AtFKGP|F6F3.3|F6F3_3|L-fucokinase/GDP-L-fucose pyrophosphorylase	0	0	0
AT1G01240	0	0	1	0	1	1	1	1	0	0	0	0	0	0	0	0	1	0	NA	NA	137.3	NA	108.3	131.6	98.4	181.6	NA	NA	NA	NA	NA	NA	NA	NA	264.3	NA	F633.5|F633_5|F6F3.27	0	0	0
AT1G01260	0	1	1	1	0	1	1	0	0	0	0	0	0	0	0	0	1	1	NA	198.7	230.7	262.3	NA	140.4	123.9	NA	NA	NA	NA	NA	NA	NA	NA	NA	361	173.4	F6F3.7|F6F3_7|JAM2|Jasmonate Associated MYC2 LIKE 2	0	0	0
AT1G01300	0	0	0	0	0	0	0	1	0	0	0	0	0	0	0	0	1	1	NA	NA	NA	NA	NA	NA	NA	295	NA	NA	NA	NA	NA	NA	NA	NA	274	196.4	F6F3.10|F6F3_10	0	0	0
AT1G01305	0	0	1	1	1	1	0	0	0	0	0	0	0	0	0	0	0	1	NA	NA	278.4	270	141.4	151.5	NA	NA	NA	NA	NA	NA	NA	NA	NA	NA	NA	236.8	-	0	0	0
AT1G01310	0	0	0	0	0	0	1	0	0	0	0	0	0	0	0	0	0	0	NA	NA	NA	NA	NA	NA	220.3	NA	NA	NA	NA	NA	NA	NA	NA	NA	NA	NA	F6F3.11|F6F3_11	0	0	0
AT1G01320	0	1	1	1	0	0	1	1	0	0	1	1	1	0	0	0	1	1	NA	116.5	170.2	159.6	NA	NA	88.5	328.4	NA	NA	165.4	143.9	58.1	NA	NA	NA	317.5	145	F6F3.12|F6F3_12	0	0	0
AT1G01360	0	0	1	1	1	0	0	1	0	0	1	1	0	0	0	0	0	1	NA	NA	184.8	154.1	133.1	NA	NA	212.5	NA	NA	178.1	178.6	NA	NA	NA	NA	NA	184.4	F6F3.16|F6F3_16|PYL9|PYRABACTIN RESISTANCE 1-LIKE 9|regulatory component of ABA receptor 1	0	0	1
AT1G01380	0	1	1	1	1	1	1	1	0	0	1	1	0	0	0	0	1	1	NA	190.2	198.9	155.2	178.6	168.8	86.6	276.7	NA	NA	150.3	134.5	NA	NA	NA	NA	1192.7	178.2	ENHANCER OF TRY AND CPC 1|F6F3.18|F6F3_18	0	0	0
AT1G01420	0	1	1	1	0	0	0	1	0	0	0	0	0	0	0	0	0	0	NA	210.3	223.4	195	NA	NA	NA	127.6	NA	NA	NA	NA	NA	NA	NA	NA	NA	NA	F6F3.22|F6F3_22|UDP-glucosyl transferase 72B3	0	0	0
AT1G01430	0	0	1	1	1	0	1	0	0	0	0	0	0	0	0	0	1	1	NA	NA	223.1	218.7	122.9	NA	206.6	NA	NA	NA	NA	NA	NA	NA	NA	NA	153.2	302.6	F6F3.23|F6F3_23|TRICHOME BIREFRINGENCE-LIKE 25	0	0	1
AT1G01448	0	0	0	1	0	0	0	0	0	0	0	0	0	0	0	0	0	0	NA	NA	NA	153.7	NA	NA	NA	NA	NA	NA	NA	NA	NA	NA	NA	NA	NA	NA	-	0	0	0
AT1G01460	0	0	0	0	0	0	0	1	0	0	0	0	0	0	0	0	0	0	NA	NA	NA	NA	NA	NA	NA	187.1	NA	NA	NA	NA	NA	NA	NA	NA	NA	NA	ATPIPK11|F22L4.2|F22L4_2	0	0	0
AT1G01470	0	0	0	0	0	0	0	1	0	0	0	0	0	0	0	0	0	0	NA	NA	NA	NA	NA	NA	NA	135.1	NA	NA	NA	NA	NA	NA	NA	NA	NA	NA	F22L4.3|F22L4_3|LATE EMBRYOGENESIS ABUNDANT 14|LEA1|LIGHT STRESS-REGULATED 3|LSR3	0	0	1
AT1G01471	0	1	1	1	1	1	1	0	1	0	1	1	0	0	0	0	0	1	NA	220.2	436.1	466.4	189	128.5	206.6	NA	100.8	NA	175.4	161.7	NA	NA	NA	NA	NA	234.1	NoInfo	0	0	0
AT1G01480	0	0	1	0	0	0	1	0	0	0	0	0	0	0	0	0	0	0	NA	NA	412.3	NA	NA	NA	163.3	NA	NA	NA	NA	NA	NA	NA	NA	NA	NA	NA	1-AMINOCYCLOPROPANE-1-CARBOXYLATE SYNTHASE|1-amino-cyclopropane-1-carboxylate synthase 2|AT-ACC2|EC 4.4.1.14|F22L4.4|F22L4_4|S-ADENOSYL-L-METHIONINE METHYLTHIOADENOSINE-LYASE	0	0	0
AT1G01490	0	1	0	1	1	1	1	0	0	0	0	0	0	0	0	0	1	1	NA	264	NA	344.4	218.4	222.9	198.7	NA	NA	NA	NA	NA	NA	NA	NA	NA	194.3	248.1	F22L4.5|F22L4_5	0	0	1
AT1G01530	0	0	0	0	0	0	0	1	0	0	0	0	0	0	0	0	0	0	NA	NA	NA	NA	NA	NA	NA	219.3	NA	NA	NA	NA	NA	NA	NA	NA	NA	NA	AGAMOUS-like 28|F22L4.7|F22L4_7	0	0	0
AT1G01540	1	0	1	1	1	1	0	0	0	0	1	1	1	0	1	0	0	1	207.8	NA	255	282.7	151.4	171.1	NA	NA	NA	NA	272.5	256.3	59.2	NA	123.7	NA	NA	299.2	F22L4.8|F22L4_8	0	0	1
AT1G01550	0	1	1	1	1	1	1	1	0	0	1	1	1	0	1	0	1	1	NA	259.7	444.9	473	246.2	163.4	269.5	106.1	NA	NA	303.3	318.9	61.5	NA	121.3	NA	280.8	247.5	BYPASS 1|F22L4.9|F22L4_9	0	0	0
AT1G01570	0	1	1	1	1	0	1	1	1	0	1	1	0	0	0	0	1	1	NA	166.2	427.6	437.6	163	NA	255.8	1158.7	104	NA	275.7	259.6	NA	NA	NA	NA	404.5	312.9	F22L4.11|F22L4_11	0	0	0
AT1G01580	0	0	0	0	0	0	1	0	0	0	0	0	1	0	0	0	0	0	NA	NA	NA	NA	NA	NA	175.1	NA	NA	NA	NA	NA	47.1	NA	NA	NA	NA	NA	ATFRO2|F22L4.12|F22L4_12|FERRIC CHELATE REDUCTASE DEFECTIVE 1|FERRIC REDUCTION OXIDASE 2|FRD1|ferric reduction oxidase 2	0	0	0
AT1G01600	0	0	1	1	0	0	1	1	0	0	0	0	0	0	0	0	0	0	NA	NA	114.2	109.5	NA	NA	84.6	197.6	NA	NA	NA	NA	NA	NA	NA	NA	NA	NA	''cytochrome P450|F22L4.14|F22L4_14|cytochrome P450|family 86|polypeptide 4|polypeptide 4''|subfamily A	0	0	0
AT1G01610	0	0	0	0	0	0	1	0	0	0	0	0	0	0	0	0	0	0	NA	NA	NA	NA	NA	NA	135.7	NA	NA	NA	NA	NA	NA	NA	NA	NA	NA	NA	ATGPAT4|F22L4.15|F22L4_15|GLYCEROL-3-PHOSPHATE ACYLTRANSFERASE 4|GLYCEROL-3-PHOSPHATE sn-2-ACYLTRANSFERASE 4|glycerol-3-phosphate acyltransferase 4	0	0	0
AT1G01630	0	0	1	1	1	1	0	1	0	0	0	0	0	0	0	0	1	1	NA	NA	221.6	227.2	167.7	135	NA	119.1	NA	NA	NA	NA	NA	NA	NA	NA	241.1	273.8	T1N6.1|T1N6_1	0	0	0
AT1G01640	0	0	0	0	0	0	0	1	0	0	0	0	0	0	0	0	0	0	NA	NA	NA	NA	NA	NA	NA	167.8	NA	NA	NA	NA	NA	NA	NA	NA	NA	NA	T1N6.2|T1N6_2	0	0	0
AT1G01650	1	1	1	1	1	1	1	0	0	0	1	1	0	0	0	0	0	1	76.7	250.9	247.9	233.1	144.7	144.2	123.9	NA	NA	NA	149.1	131.8	NA	NA	NA	NA	NA	200.8	ARABIDOPSIS THALIANA SIGNAL PEPTIDE PEPTIDASE-LIKE 4|ATSPPL4|SIGNAL PEPTIDE PEPTIDASE-LIKE 4|T1N6.3|T1N6_3	0	0	0
AT1G01660	0	0	0	0	0	0	0	1	0	0	0	0	0	0	0	0	0	0	NA	NA	NA	NA	NA	NA	NA	390.4	NA	NA	NA	NA	NA	NA	NA	NA	NA	NA	T1N6.4|T1N6_4	0	0	0
AT1G01680	0	0	1	1	1	0	0	1	0	0	0	1	0	0	0	0	0	1	NA	NA	168.8	217.7	99.6	NA	NA	81.2	NA	NA	NA	77.8	NA	NA	NA	NA	NA	133.7	ATPUB54|PLANT U-BOX 54|T1N6.5|T1N6_5|plant U-box 54	0	0	0
AT1G01690	0	1	0	0	0	0	0	0	0	0	0	0	0	0	0	0	0	0	NA	91	NA	NA	NA	NA	NA	NA	NA	NA	NA	NA	NA	NA	NA	NA	NA	NA	ARABIDOPSIS THALIANA PUTATIVE RECOMBINATION INITIATION DEFECTS 3|ATPRD3|T1N6.6|T1N6_6|putative recombination initiation defects 3	0	0	0
AT1G01695	0	0	1	0	0	0	1	1	0	0	1	1	0	0	0	0	0	0	NA	NA	57.5	NA	NA	NA	45.2	111.4	NA	NA	78.9	81.9	NA	NA	NA	NA	NA	NA	TON1 Recruiting Motif 33	0	0	0
AT1G01710	0	0	0	0	0	0	0	1	0	0	0	0	0	0	0	0	0	0	NA	NA	NA	NA	NA	NA	NA	140.9	NA	NA	NA	NA	NA	NA	NA	NA	NA	NA	T1N6.10|T1N6.9|T1N6_10|T1N6_9	0	0	0
AT1G01720	0	0	1	1	1	1	1	0	0	0	1	1	0	0	0	0	1	1	NA	NA	381.7	396.8	346.6	312.8	177.1	NA	NA	NA	190.6	187.3	NA	NA	NA	NA	152.2	294.1	ANAC002|ANAC2|Arabidopsis NAC domain containing protein 2|T1N6.12|T1N6_12	0	0	0
AT1G01740	0	0	0	0	0	0	0	1	0	0	0	0	0	0	0	0	0	0	NA	NA	NA	NA	NA	NA	NA	200.8	NA	NA	NA	NA	NA	NA	NA	NA	NA	NA	T1N6.15|T1N6_15|brassinosteroid-signaling kinase 4	0	0	0
AT1G01750	0	0	1	1	0	0	0	0	0	0	0	0	0	0	0	0	0	0	NA	NA	128.9	129.3	NA	NA	NA	NA	NA	NA	NA	NA	NA	NA	NA	NA	NA	NA	T1N6.16|T1N6_16|actin depolymerizing factor 11	0	0	0
AT1G01770	0	0	0	0	0	0	0	0	0	0	0	0	1	0	0	0	0	0	NA	NA	NA	NA	NA	NA	NA	NA	NA	NA	NA	NA	57	NA	NA	NA	NA	NA	T1N6.18|T1N6_18	0	0	0
AT1G01780	0	0	0	0	1	0	0	1	0	0	0	0	0	0	0	0	0	0	NA	NA	NA	NA	122.1	NA	NA	173.1	NA	NA	NA	NA	NA	NA	NA	NA	NA	NA	T1N6.19|T1N6_19	0	0	0
AT1G01790	0	1	1	1	0	0	0	0	0	0	0	1	0	0	0	0	0	0	NA	99.9	70	85.4	NA	NA	NA	NA	NA	NA	NA	85.6	NA	NA	NA	NA	NA	NA	ATKEA1|K+ EFFLUX ANTIPORTER 1|K+ efflux antiporter 1|T1N6.21|T1N6_21	0	0	0
AT1G01800	0	0	1	1	0	0	0	1	0	0	0	0	1	0	0	0	1	1	NA	NA	145.3	123	NA	NA	NA	221	NA	NA	NA	NA	60.8	NA	NA	NA	270.1	111	T1N6.22|T1N6_22	0	0	0
AT1G01840	1	0	1	1	0	0	0	1	0	0	0	0	0	0	0	0	0	1	128.7	NA	193.4	189.9	NA	NA	NA	98.7	NA	NA	NA	NA	NA	NA	NA	NA	NA	184.7	T1N6.26|T1N6_26	0	0	0
AT1G01890	0	0	1	0	0	1	0	0	0	0	0	0	0	0	0	0	0	0	NA	NA	79.2	NA	NA	106.1	NA	NA	NA	NA	NA	NA	NA	NA	NA	NA	NA	NA	51779.TRNA-LYS-1	0	0	0
AT1G01910	0	1	0	0	0	0	0	0	0	0	0	0	0	0	0	0	0	0	NA	88.9	NA	NA	NA	NA	NA	NA	NA	NA	NA	NA	NA	NA	NA	NA	NA	NA	F22M8.4|F22M8_4	0	0	0
AT1G01920	0	0	0	0	0	0	0	1	0	0	0	0	0	0	0	0	0	0	NA	NA	NA	NA	NA	NA	NA	108.1	NA	NA	NA	NA	NA	NA	NA	NA	NA	NA	F22M8.5|F22M8_5	0	0	0
AT1G01930	0	0	0	0	0	0	0	1	0	0	0	0	0	0	0	0	0	0	NA	NA	NA	NA	NA	NA	NA	101.9	NA	NA	NA	NA	NA	NA	NA	NA	NA	NA	F22M8.6|F22M8_6	0	0	0
AT1G01950	1	1	1	1	1	1	1	1	0	0	1	1	0	0	0	0	1	1	83.7	158.1	214.3	220.4	182.6	186.2	179	117.4	NA	NA	212.5	222.3	NA	NA	NA	NA	217.9	183	Arabidopsis thaliana KINESIN Ungrouped clade|AtKINUb|F22M8.8|F22M8_8|armadillo repeat kinesin 2|gene B	0	0	0
AT1G01970	0	1	0	0	0	0	0	0	0	0	0	0	0	0	0	0	0	0	NA	104.1	NA	NA	NA	NA	NA	NA	NA	NA	NA	NA	NA	NA	NA	NA	NA	NA	F22M8.10|F22M8_10	0	0	0
AT1G01990	0	0	0	1	0	0	0	1	0	0	0	0	0	0	0	0	0	0	NA	NA	NA	112.3	NA	NA	NA	69.7	NA	NA	NA	NA	NA	NA	NA	NA	NA	NA	F22M8.12|F22M8_12	0	0	0
AT1G02000	0	0	1	0	0	0	0	0	0	0	0	0	0	0	0	0	0	0	NA	NA	118.9	NA	NA	NA	NA	NA	NA	NA	NA	NA	NA	NA	NA	NA	NA	NA	F22M8.13|F22M8_13|UDP-D-glucuronate 4-epimerase 2	0	0	0
AT1G02010	0	0	0	0	0	0	0	1	0	0	0	0	0	0	0	0	0	0	NA	NA	NA	NA	NA	NA	NA	1313.3	NA	NA	NA	NA	NA	NA	NA	NA	NA	NA	secretory 1A	0	0	0
AT1G02020	0	0	0	0	0	0	0	1	0	0	0	0	0	0	0	0	0	0	NA	NA	NA	NA	NA	NA	NA	869.9	NA	NA	NA	NA	NA	NA	NA	NA	NA	NA	T7I23.2|T7I23_2	0	0	0
AT1G02030	0	1	1	1	0	0	0	0	0	0	0	0	0	0	0	0	0	1	NA	133.4	119.4	127.4	NA	NA	NA	NA	NA	NA	NA	NA	NA	NA	NA	NA	NA	106.6	T7I23.3|T7I23_3	0	0	0
AT1G02040	0	0	0	0	0	0	0	1	0	0	0	0	0	0	0	0	0	0	NA	NA	NA	NA	NA	NA	NA	88.2	NA	NA	NA	NA	NA	NA	NA	NA	NA	NA	T7I23.24|T7I23_24	0	0	0
AT1G02065	1	1	1	1	1	1	1	0	1	1	1	1	0	0	0	0	0	1	163.6	464.1	545	515.8	294.2	310.9	277.4	NA	211.2	166.6	324.5	278.4	NA	NA	NA	NA	NA	394.1	squamosa promoter binding protein-like 8	0	0	0
AT1G02070	0	0	0	0	0	0	0	1	0	0	0	0	0	0	0	0	0	0	NA	NA	NA	NA	NA	NA	NA	376.4	NA	NA	NA	NA	NA	NA	NA	NA	NA	NA	T7I23.30|T7I23_30	0	0	0
AT1G02080	0	0	0	0	0	0	0	1	0	0	0	0	0	0	0	0	0	0	NA	NA	NA	NA	NA	NA	NA	132.1	NA	NA	NA	NA	NA	NA	NA	NA	NA	NA	T7I23.15|T7I23_15	0	0	0
AT1G02090	0	0	0	0	0	0	1	1	0	0	0	0	0	0	0	0	0	0	NA	NA	NA	NA	NA	NA	82.6	284.5	NA	NA	NA	NA	NA	NA	NA	NA	NA	NA	ARABIDOPSIS THALIANA COP9 SIGNALOSOME SUBUNIT 7|ATCSN7|CONSTITUTIVE PHOTOMORPHOGENIC 15|COP15|COP9 SIGNALOSOME SUBUNIT 7|CSN7|FUSCA 5|T7I23.25|T7I23_25	0	0	0
AT1G02110	0	0	0	0	0	0	0	1	0	0	0	0	0	0	0	0	0	0	NA	NA	NA	NA	NA	NA	NA	76.9	NA	NA	NA	NA	NA	NA	NA	NA	NA	NA	T7I23.5|T7I23_5	0	0	0
AT1G02120	0	1	1	1	0	0	1	0	0	0	1	1	0	0	0	0	0	1	NA	131.3	83.8	75.2	NA	NA	86.6	NA	NA	NA	165.2	164.8	NA	NA	NA	NA	NA	118.6	T7I23.28|T7I23_28|VASCULAR ASSOCIATED DEATH1	0	0	0
AT1G02130	0	1	1	0	0	0	1	0	0	0	0	0	0	0	0	0	0	0	NA	112.9	80.8	NA	NA	NA	129.8	NA	NA	NA	NA	NA	NA	NA	NA	NA	NA	NA	ARA-5|ARA5|ARABIDOPSIS RAS 5|ARABIDOPSIS THALIANA RAB D2A|ARABIDOPSIS THALIANA RESPONSIVE TO ABSCISIC ACID 1B|ATRAB1B|ATRABD2A|RAB D2A|RABD2A|RAS 5|T7I23.6|T7I23_6	0	0	0
AT1G02145	0	1	0	0	0	0	0	0	0	0	0	0	0	0	0	0	0	0	NA	105.2	NA	NA	NA	NA	NA	NA	NA	NA	NA	NA	NA	NA	NA	NA	NA	NA	EBS4|EMS-MUTAGENIZED BRI1(BRASSINOSTEROID INSENSITIVE 1) SUPPRESSOR 4|homolog of asparagine-linked glycosylation 12	0	0	0
AT1G02180	0	1	1	0	0	0	1	0	0	0	1	0	0	0	0	0	0	0	NA	222.3	116	NA	NA	NA	108.2	NA	NA	NA	194.4	NA	NA	NA	NA	NA	NA	NA	T6A9.14	0	0	0
AT1G02190	0	0	0	1	0	0	0	0	0	0	0	1	0	0	0	0	1	1	NA	NA	NA	99	NA	NA	NA	NA	NA	NA	NA	179.9	NA	NA	NA	NA	203.5	194.7	T6A9.15	0	0	0
AT1G02205	0	1	1	1	1	1	1	0	0	0	1	1	0	0	0	0	1	1	NA	161.6	167.7	175.2	126.8	139.2	110.2	NA	NA	NA	106.6	105	NA	NA	NA	NA	651.4	137.4	AT1G02200|CER22|ECERIFERUM 1|ECERIFERUM 22|POSSIBLE ALDEHYDE DECARBONYLASE|T6A9.16	0	0	0
AT1G02210	1	1	1	1	1	1	1	1	0	0	1	1	0	0	0	0	1	1	183	329.3	359.6	381.5	272	247.8	228.2	100.4	NA	NA	202.3	174.3	NA	NA	NA	NA	164.3	278.6	T6A9.33	0	0	0
AT1G02220	0	0	0	1	0	0	0	0	0	0	0	0	0	0	0	0	0	1	NA	NA	NA	303.6	NA	NA	NA	NA	NA	NA	NA	NA	NA	NA	NA	NA	NA	179.9	ANAC003|NAC domain containing protein 3|T6A9.17	0	0	0
AT1G02228	0	0	1	1	1	1	1	0	0	0	0	0	0	0	0	0	0	1	NA	NA	347.8	285.8	188.2	127.7	82.6	NA	NA	NA	NA	NA	NA	NA	NA	NA	NA	158.3	-	0	0	0
AT1G02230	0	1	1	1	1	1	1	0	0	0	0	0	0	0	0	0	1	0	NA	139.4	198.2	223.1	128.1	114.7	133.8	NA	NA	NA	NA	NA	NA	NA	NA	NA	115	NA	ANAC004|NAC domain containing protein 4|T6A9.19	0	0	0
AT1G02250	0	0	0	0	0	0	0	1	0	0	0	0	0	0	0	0	0	1	NA	NA	NA	NA	NA	NA	NA	86.9	NA	NA	NA	NA	NA	NA	NA	NA	NA	133	NAC domain containing protein 5|T6A9.20|anac005	0	0	0
AT1G02270	0	0	0	0	0	1	0	0	0	0	0	0	0	0	0	0	0	1	NA	NA	NA	NA	NA	90.3	NA	NA	NA	NA	NA	NA	NA	NA	NA	NA	NA	99.1	T6A9.35	0	0	0
AT1G02300	0	0	1	0	0	0	0	0	0	0	0	1	0	0	0	0	0	1	NA	NA	65.7	NA	NA	NA	NA	NA	NA	NA	NA	98.9	NA	NA	NA	NA	NA	68.2	T6A9.28|T7I23.12|T7I23_12	0	0	1
AT1G02305	0	0	0	0	0	0	0	1	0	0	0	0	0	0	0	0	0	0	NA	NA	NA	NA	NA	NA	NA	156.4	NA	NA	NA	NA	NA	NA	NA	NA	NA	NA	-	0	0	1
AT1G02310	0	0	1	1	0	0	0	1	0	0	0	0	0	0	0	0	0	1	NA	NA	220.9	267	NA	NA	NA	149.9	NA	NA	NA	NA	NA	NA	NA	NA	NA	103.2	T6A9.1|T6A9_1|endo-beta-mannanase 1	0	0	0
AT1G02330	0	0	0	0	0	0	0	1	0	0	0	0	0	0	0	0	0	0	NA	NA	NA	NA	NA	NA	NA	448.8	NA	NA	NA	NA	NA	NA	NA	NA	NA	NA	T6A9.2|T6A9_2	0	0	0
AT1G02335	0	0	0	0	0	0	1	0	0	0	0	0	0	0	0	0	0	0	NA	NA	NA	NA	NA	NA	120	NA	NA	NA	NA	NA	NA	NA	NA	NA	NA	NA	PDGLP2|PLASMODESMAL GERMIN-LIKE PROTEIN 2|T6A9.3|germin-like protein subfamily 2 member 2 precursor	0	0	0
AT1G02340	0	0	0	0	1	0	0	1	0	0	0	0	0	0	0	0	0	0	NA	NA	NA	NA	265.8	NA	NA	154.9	NA	NA	NA	NA	NA	NA	NA	NA	NA	NA	FBI1|LONG HYPOCOTYL IN FAR-RED|REDUCED PHYTOCHROME SIGNALING 1|REDUCED SENSITIVITY TO FAR-RED LIGHT 1|REP1|RSF1|T6A9.4|T6A9_4	0	0	1
AT1G02350	0	0	0	0	1	1	1	0	0	0	1	1	0	0	0	0	1	1	NA	NA	NA	NA	279.3	331.4	192.8	NA	NA	NA	254.6	231	NA	NA	NA	NA	497.3	342	T6A9.34	0	0	0
AT1G02360	1	1	1	1	1	1	1	1	1	0	1	1	0	1	0	0	0	1	314	469.7	408.8	418.2	239.5	368.2	206.6	115.6	168.3	NA	279.8	263.1	NA	165.2	NA	NA	NA	529.5	T6A9.5|T6A9_5	0	0	0
AT1G02380	0	0	0	1	0	1	0	0	0	0	0	0	0	0	0	0	1	1	NA	NA	NA	275.7	NA	122	NA	NA	NA	NA	NA	NA	NA	NA	NA	NA	158.5	221.1	T6A9.7|T6A9_7	0	0	0
AT1G02390	0	0	0	0	0	0	0	1	0	0	0	0	0	0	0	0	0	0	NA	NA	NA	NA	NA	NA	NA	338.4	NA	NA	NA	NA	NA	NA	NA	NA	NA	NA	ARABIDOPSIS THALIANA GLYCEROL-3-PHOSPHATE ACYLTRANSFERASE 2|ATGPAT2|GLYCEROL-3-PHOSPHATE sn-2-ACYLTRANSFERASE 2|T6A9.8|T6A9_8|glycerol-3-phosphate acyltransferase 2	0	0	0
AT1G02391	0	0	0	0	0	1	0	1	0	0	0	0	0	0	0	0	0	0	NA	NA	NA	NA	NA	205.2	NA	358.4	NA	NA	NA	NA	NA	NA	NA	NA	NA	NA	NoInfo	0	0	0
AT1G02400	0	0	1	1	1	1	1	0	0	0	0	0	0	0	0	0	0	1	NA	NA	580.5	513.2	335	284.4	192.8	NA	NA	NA	NA	NA	NA	NA	NA	NA	NA	409.9	ARABIDOPSIS THALIANA GIBBERELLIN 2-OXIDASE 4|ARABIDOPSIS THALIANA GIBBERELLIN 2-OXIDASE 6|ATGA2OX4|ATGA2OX6|Arabidopsis thaliana gibberellin 2-oxidase 4|DOWNSTREAM TARGET OF AGL15 1|DTA1|T6A9.9|T6A9_9|gibberellin 2-oxidase 6	0	0	1
AT1G02405	0	0	0	0	0	0	1	0	0	0	0	0	0	0	0	0	0	0	NA	NA	NA	NA	NA	NA	125.9	NA	NA	NA	NA	NA	NA	NA	NA	NA	NA	NA	-	0	0	0
AT1G02440	0	0	1	0	0	0	0	0	0	0	0	0	0	0	0	0	0	0	NA	NA	182.7	NA	NA	NA	NA	NA	NA	NA	NA	NA	NA	NA	NA	NA	NA	NA	ADP-ribosylation factor D1A|ATARFD1A|T6A9.25	0	0	0
AT1G02450	0	1	1	1	1	0	1	1	0	0	1	1	0	0	0	0	0	1	NA	150.7	352.6	349.7	165	NA	96.4	506	NA	NA	127.7	102.6	NA	NA	NA	NA	NA	194	NIM1-interacting 1|NIMIN-1|T6A9.23	0	0	0
AT1G02460	0	0	0	0	0	0	1	1	0	0	0	0	0	0	0	0	0	0	NA	NA	NA	NA	NA	NA	47.2	284.5	NA	NA	NA	NA	NA	NA	NA	NA	NA	NA	T6A9.22	0	0	0
AT1G02470	0	0	0	0	0	0	0	1	0	0	0	0	0	0	0	0	0	0	NA	NA	NA	NA	NA	NA	NA	118.6	NA	NA	NA	NA	NA	NA	NA	NA	NA	NA	T6A9.26	0	0	1
AT1G02480	0	0	0	0	0	0	1	0	0	0	0	0	0	0	0	0	0	0	NA	NA	NA	NA	NA	NA	59	NA	NA	NA	NA	NA	NA	NA	NA	NA	NA	NA	51953.TRNA-PHE-1	0	0	0
AT1G02490	0	0	0	1	0	0	0	0	0	0	0	0	0	0	0	0	0	0	NA	NA	NA	105.5	NA	NA	NA	NA	NA	NA	NA	NA	NA	NA	NA	NA	NA	NA	T14P4.35|T14P4_35	0	0	0
AT1G02500	0	0	0	0	0	0	0	0	0	0	0	0	0	0	0	0	1	0	NA	NA	NA	NA	NA	NA	NA	NA	NA	NA	NA	NA	NA	NA	NA	NA	225.2	NA	AtSAM1|MAT1|METK1|S-ADENOSYLMETHIONINE SYNTHETASE-1|S-adenosylmethionine synthetase 1|SAM-1	0	0	0
AT1G02510	0	1	0	0	0	0	1	0	0	0	0	0	0	0	0	0	0	0	NA	158.8	NA	NA	NA	NA	70.8	NA	NA	NA	NA	NA	NA	NA	NA	NA	NA	NA	ATKCO4|ATTPK4|CA2+ ACTIVATED OUTWARD RECTIFYING K+ CHANNEL 4|KCO4|T14P4.16|T14P4_16	0	0	0
AT1G02520	0	0	1	1	0	0	0	1	0	0	0	0	0	0	0	0	0	0	NA	NA	140.1	141.6	NA	NA	NA	125.9	NA	NA	NA	NA	NA	NA	NA	NA	NA	NA	ATP-binding cassette B11|MDR8|P-glycoprotein 11|PGP11|T14P4.15|T14P4_15|multi-drug resistance 8	1	0	0
AT1G02530	0	0	0	0	0	0	0	1	0	0	0	0	0	0	0	0	0	0	NA	NA	NA	NA	NA	NA	NA	123.6	NA	NA	NA	NA	NA	NA	NA	NA	NA	NA	ATP-binding cassette B12|P-glycoprotein 12|PGP12|T14P4.14|T14P4_14	1	0	0
AT1G02540	0	0	0	0	0	0	0	1	0	0	0	0	0	0	0	0	0	0	NA	NA	NA	NA	NA	NA	NA	88.4	NA	NA	NA	NA	NA	NA	NA	NA	NA	NA	T14P4.13|T14P4_13	0	0	0
AT1G02560	0	1	1	1	1	0	1	0	0	0	1	1	0	0	0	0	0	1	NA	158.8	129.5	80	81.3	NA	92.5	NA	NA	NA	113.1	129.3	NA	NA	NA	NA	NA	92.2	CLP PROTEASE 1 PROTEOLYTIC SUBUNIT|NCLPP1|NCLPP5|NUCLEAR CLPP 5|NUCLEAR-ENCODED CLPP 1|T14P4.12|T14P4_12|nuclear encoded CLP protease 5	0	0	0
AT1G02575	0	0	0	0	0	0	0	1	0	0	0	0	0	0	0	0	0	0	NA	NA	NA	NA	NA	NA	NA	340.2	NA	NA	NA	NA	NA	NA	NA	NA	NA	NA	-	0	0	0
AT1G02580	0	0	1	1	1	0	0	1	0	0	1	1	0	0	0	0	0	1	NA	NA	95.7	83.8	89.4	NA	NA	210.1	NA	NA	100	98.4	NA	NA	NA	NA	NA	138.1	EMB173|EMBRYO DEFECTIVE 173|FERTILIZATION INDEPENDENT SEED 1|FIS1|MEDEA|SDG5|SET DOMAIN-CONTAINING PROTEIN 5|T14P4.11|T14P4_11	0	0	0
AT1G02590	0	0	0	0	0	1	1	0	0	0	0	0	0	0	0	0	0	0	NA	NA	NA	NA	NA	112.4	88.5	NA	NA	NA	NA	NA	NA	NA	NA	NA	NA	NA	T14P4.22|T14P4_22	0	0	0
AT1G02610	0	0	1	1	0	0	0	0	0	0	0	0	0	0	0	0	0	0	NA	NA	205.4	179.3	NA	NA	NA	NA	NA	NA	NA	NA	NA	NA	NA	NA	NA	NA	T14P4.10|T14P4_10	0	0	0
AT1G02620	0	0	0	0	0	0	0	1	0	0	0	0	0	0	0	0	0	0	NA	NA	NA	NA	NA	NA	NA	106.6	NA	NA	NA	NA	NA	NA	NA	NA	NA	NA	T14P4.21|T14P4_21	0	0	0
AT1G02630	0	0	0	0	1	1	0	1	0	0	0	0	0	0	0	0	1	1	NA	NA	NA	NA	160.1	165.1	NA	88.9	NA	NA	NA	NA	NA	NA	NA	NA	274.5	210.4	T14P4.9|T14P4_9	0	0	0
AT1G02640	0	0	1	1	1	1	0	0	0	0	0	0	0	0	0	0	0	1	NA	NA	204.5	237.5	201.2	185.1	NA	NA	NA	NA	NA	NA	NA	NA	NA	NA	NA	149.8	ATBXL2|BETA-XYLOSIDASE 2|T14P4.8|T14P4_8|beta-xylosidase 2	0	0	0
AT1G02650	0	0	0	0	0	0	0	1	0	0	0	0	0	0	0	0	0	0	NA	NA	NA	NA	NA	NA	NA	144.6	NA	NA	NA	NA	NA	NA	NA	NA	NA	NA	T14P4.7|T14P4_7	0	0	0
AT1G02670	0	1	1	1	1	1	1	0	0	0	1	1	0	0	1	0	0	1	NA	146.5	271.6	244.3	189.4	184.9	424.9	NA	NA	NA	215.9	238.6	NA	NA	98.1	NA	NA	197.4	T14P4.5|T14P4_5	0	0	0
AT1G02690	0	1	0	1	0	0	0	0	0	0	0	0	0	0	0	0	0	0	NA	99.9	NA	72.9	NA	NA	NA	NA	NA	NA	NA	NA	NA	NA	NA	NA	NA	NA	T14P4.3|T14P4_3|importin alpha isoform 6	0	0	0
AT1G02720	0	0	1	1	0	0	0	1	0	0	0	0	0	0	0	0	0	0	NA	NA	70.6	79.2	NA	NA	NA	485	NA	NA	NA	NA	NA	NA	NA	NA	NA	NA	AtGATL5|T14P4.1|T14P4_1|galacturonosyltransferase 5|galacturonosyltransferase-like 5	0	0	0
AT1G02740	0	0	1	0	0	0	0	0	0	0	0	0	0	0	0	0	0	0	NA	NA	72.2	NA	NA	NA	NA	NA	NA	NA	NA	NA	NA	NA	NA	NA	NA	NA	MORF related gene 2|MRG2|T14P4.28	0	0	0
AT1G02750	0	1	0	0	0	0	0	0	0	0	0	0	0	0	0	0	0	0	NA	109.8	NA	NA	NA	NA	NA	NA	NA	NA	NA	NA	NA	NA	NA	NA	NA	NA	T14P4.27	0	0	0
AT1G02770	0	0	0	0	0	0	0	0	0	0	1	1	0	0	0	0	1	0	NA	NA	NA	NA	NA	NA	NA	NA	NA	NA	149.6	147.4	NA	NA	NA	NA	224.2	NA	T14P4.24	0	0	0
AT1G02780	0	0	0	0	0	0	0	1	0	0	0	0	0	0	0	0	0	0	NA	NA	NA	NA	NA	NA	NA	109.9	NA	NA	NA	NA	NA	NA	NA	NA	NA	NA	T14P4.34|embryo defective 2386	0	0	0
AT1G02790	0	0	0	0	0	0	0	1	0	0	0	0	0	0	0	0	0	0	NA	NA	NA	NA	NA	NA	NA	143.1	NA	NA	NA	NA	NA	NA	NA	NA	NA	NA	POLYGALACTURONASE|T14P4.31|polygalacturonase 4	0	0	0
AT1G02810	0	0	1	1	0	0	0	0	0	0	0	0	0	0	0	0	0	0	NA	NA	241.3	239.5	NA	NA	NA	NA	NA	NA	NA	NA	NA	NA	NA	NA	NA	NA	F22D16.20|F22D16_20	0	0	0
AT1G02816	0	0	0	0	0	1	0	0	0	0	0	0	0	0	0	0	0	0	NA	NA	NA	NA	NA	112.6	NA	NA	NA	NA	NA	NA	NA	NA	NA	NA	NA	NA	-	0	0	0
AT1G02840	0	0	0	0	0	0	0	1	0	0	0	0	0	0	0	0	0	0	NA	NA	NA	NA	NA	NA	NA	154.4	NA	NA	NA	NA	NA	NA	NA	NA	NA	NA	ATSRP34|At-SR34|F22D16.16|F22D16_16|SR1|SRP34|Serine/Arginine-Rich Protein Splicing Factor 34	0	0	0
AT1G02850	0	0	1	1	0	1	0	1	1	1	1	1	1	1	0	0	0	1	NA	NA	235.1	269.1	NA	141.7	NA	230.3	127.3	162.2	166.8	178.3	73.3	166.6	NA	NA	NA	221.7	F22D16.15|F22D16_15|beta glucosidase 11	0	0	1
AT1G02860	0	0	1	1	0	0	0	1	0	0	0	0	0	0	0	0	0	0	NA	NA	193.8	201.4	NA	NA	NA	148.4	NA	NA	NA	NA	NA	NA	NA	NA	NA	NA	BAH1|BENZOIC ACID HYPERSENSITIVE 1|F22D16.14|F22D16_14|nitrogen limitation adaptation	0	0	1
AT1G02880	0	1	1	1	1	0	1	1	1	0	1	1	0	0	0	0	0	1	NA	158.1	212.9	185.2	102.8	NA	68.9	116.6	88.3	NA	224.1	191.9	NA	NA	NA	NA	NA	155.6	F22D16.12|F22D16_12|thiamin pyrophosphokinase1	0	0	0
AT1G02900	0	0	1	1	0	1	1	1	0	0	1	1	0	0	0	0	0	1	NA	NA	346.5	343.1	NA	121.4	61	1016.5	NA	NA	165.5	198.3	NA	NA	NA	NA	NA	205	ATRALF1|F22D16.10|F22D16_10|RALF-LIKE 1|RALFL1|RAPID ALKALINIZATION FACTOR 1|rapid alkalinization factor 1	0	0	0
AT1G02920	0	0	1	1	0	0	0	1	0	0	0	0	0	0	0	0	0	0	NA	NA	278.3	224.9	NA	NA	NA	133.1	NA	NA	NA	NA	NA	NA	NA	NA	NA	NA	ARABIDOPSIS GLUTATHIONE S-TRANSFERASE 11|ATGST11|ATGSTF7|ATGSTF8|F22D16.8|F22D16_8|GLUTATHIONE S-TRANSFERASE 11|GST11|glutathione S-transferase 7	0	0	0
AT1G02930	0	0	0	1	0	0	0	0	0	0	0	0	0	0	0	0	0	0	NA	NA	NA	208	NA	NA	NA	NA	NA	NA	NA	NA	NA	NA	NA	NA	NA	NA	ARABIDOPSIS GLUTATHIONE S-TRANSFERASE 1|ARABIDOPSIS THALIANA GLUATIONE S-TRANSFERASE F3|ATGST1|ATGSTF3|ATGSTF6|EARLY RESPONSIVE TO DEHYDRATION 11|ERD11|F22D16.7|F22D16_7|GLUTATHIONE S-TRANSFERASE|GLUTATHIONE S-TRANSFERASE 1|GST1|glutathione S-transferase 6	0	0	0
AT1G02950	0	0	0	0	0	0	0	1	0	0	0	0	0	0	0	0	0	0	NA	NA	NA	NA	NA	NA	NA	92.2	NA	NA	NA	NA	NA	NA	NA	NA	NA	NA	ATGSTF4|F22D16.5|F22D16_5|GLUTATHIONE S-TRANSFERASE 31|GST31|glutathione S-transferase F4	0	0	0
AT1G02960	0	0	0	0	0	0	1	0	0	0	0	0	0	0	0	0	0	0	NA	NA	NA	NA	NA	NA	64.9	NA	NA	NA	NA	NA	NA	NA	NA	NA	NA	NA	F22D16.4|F22D16_4	0	0	0
AT1G02970	0	0	0	0	0	0	0	0	0	0	0	0	1	0	0	0	0	0	NA	NA	NA	NA	NA	NA	NA	NA	NA	NA	NA	NA	45.2	NA	NA	NA	NA	NA	ATWEE1|F22D16.3|F22D16_3|WEE1 kinase homolog|WEE1-KINASE	0	0	0
AT1G02980	0	0	1	0	0	0	0	1	0	0	0	0	0	0	0	0	0	0	NA	NA	55.1	NA	NA	NA	NA	273.5	NA	NA	NA	NA	NA	NA	NA	NA	NA	NA	ATCUL2|F22D16.2|F22D16_2|cullin 2	0	0	0
AT1G02990	0	0	1	1	0	0	1	1	0	0	0	0	0	0	0	0	0	0	NA	NA	73.2	49.3	NA	NA	51.2	116.6	NA	NA	NA	NA	NA	NA	NA	NA	NA	NA	F22D16.1|F22D16_1	0	0	0
AT1G03000	0	0	0	0	0	0	0	0	0	0	0	0	0	0	0	0	1	0	NA	NA	NA	NA	NA	NA	NA	NA	NA	NA	NA	NA	NA	NA	NA	NA	133.9	NA	F10O3.18|F10O3_18|peroxin 6	0	0	0
AT1G03010	0	0	0	0	0	0	0	1	0	0	0	0	0	0	0	0	0	0	NA	NA	NA	NA	NA	NA	NA	284.7	NA	NA	NA	NA	NA	NA	NA	NA	NA	NA	F10O3.17|F10O3_17	0	0	0
AT1G03020	0	0	0	0	0	0	0	1	0	0	0	0	0	0	0	0	0	0	NA	NA	NA	NA	NA	NA	NA	106.9	NA	NA	NA	NA	NA	NA	NA	NA	NA	NA	F10O3.16|F10O3_16	0	0	0
AT1G03030	0	1	1	1	0	0	1	0	0	0	1	1	0	0	0	0	0	1	NA	158.8	115.9	92.6	NA	NA	98.4	NA	NA	NA	174.7	153.1	NA	NA	NA	NA	NA	142.6	F10O3.15|F10O3_15	0	0	0
AT1G03040	0	1	1	1	0	0	0	0	0	0	0	1	0	0	0	0	0	1	NA	125.3	145.2	143.2	NA	NA	NA	NA	NA	NA	NA	122.5	NA	NA	NA	NA	NA	103.2	F10O3.14|F10O3_14	0	0	0
AT1G03060	0	1	1	1	1	1	1	1	0	0	1	1	1	0	0	0	0	1	NA	145.7	154.6	155.6	105.1	134.8	64.9	108.1	NA	NA	101.7	106.6	69.5	NA	NA	NA	NA	121.7	F10O3.12|F10O3_12|SPIRRIG	0	0	0
AT1G03070	0	0	0	0	0	0	0	1	0	0	0	0	0	0	0	0	0	0	NA	NA	NA	NA	NA	NA	NA	101.4	NA	NA	NA	NA	NA	NA	NA	NA	NA	NA	AtLFG4|F10O3.11|F10O3_11|LFG4|LIFEGUARD 4	0	0	0
AT1G03080	0	1	1	1	1	1	0	1	0	0	0	0	0	0	0	0	0	1	NA	142.2	276	262	192.6	157.3	NA	95.4	NA	NA	NA	NA	NA	NA	NA	NA	NA	186.8	F10O3.10|F10O3_10|Networked 1D	0	0	0
AT1G03090	0	0	1	1	1	1	1	1	0	0	1	1	0	0	0	0	0	1	NA	NA	269.2	273	176.1	160.5	169.2	156.9	NA	NA	182.3	156	NA	NA	NA	NA	NA	203.2	-	0	0	1
AT1G03100	0	0	0	0	0	0	1	0	0	0	0	0	0	0	0	0	0	0	NA	NA	NA	NA	NA	NA	149.5	NA	NA	NA	NA	NA	NA	NA	NA	NA	NA	NA	F10O3.8|F10O3_8	0	0	0
AT1G03110	0	1	0	0	0	0	0	1	0	0	0	0	0	0	0	0	0	0	NA	105.9	NA	NA	NA	NA	NA	282.7	NA	NA	NA	NA	NA	NA	NA	NA	NA	NA	AtTRM82|F10O3.6|F10O3_6|tRNA modification 82	0	0	0
AT1G03130	0	1	1	0	0	0	0	0	1	0	1	0	0	0	0	0	0	1	NA	149.6	78	NA	NA	NA	NA	NA	120.9	NA	199	NA	NA	NA	NA	NA	NA	143.3	PSI-D|photosystem I subunit D-2	0	0	1
AT1G03170	0	1	1	1	0	0	1	1	0	0	0	1	0	0	0	0	1	1	NA	126	75.9	129.5	NA	NA	64.9	289.5	NA	NA	NA	119.4	NA	NA	NA	NA	192.8	140.9	F15K9.22|F15K9_22|FANTASTIC FOUR 2|FLORAL TRANSITION AT THE MERISTEM5|FTM5	0	0	0
AT1G03180	0	1	0	0	0	0	0	1	0	0	0	0	0	0	0	0	0	0	NA	103.4	NA	NA	NA	NA	NA	175.1	NA	NA	NA	NA	NA	NA	NA	NA	NA	NA	F15K9.21|F15K9_21	0	0	0
AT1G03200	0	1	1	1	0	0	1	0	0	0	1	0	0	0	0	0	0	0	NA	112.2	75	84.9	NA	NA	66.9	NA	NA	NA	93.5	NA	NA	NA	NA	NA	NA	NA	F15K9.24|F15K9_24	0	0	0
AT1G03220	0	0	1	1	1	1	1	1	0	0	0	0	0	0	0	0	0	1	NA	NA	288.6	235.9	150	125.2	106.2	546.2	NA	NA	NA	NA	NA	NA	NA	NA	NA	186.4	F15K9.17|F15K9_17	0	0	0
AT1G03230	0	0	0	0	0	0	0	0	0	0	0	0	1	0	0	0	0	0	NA	NA	NA	NA	NA	NA	NA	NA	NA	NA	NA	NA	69.9	NA	NA	NA	NA	NA	F15K9.16|F15K9_16	0	0	0
AT1G03250	0	0	0	0	0	0	0	1	0	0	0	0	0	0	0	0	0	0	NA	NA	NA	NA	NA	NA	NA	134.6	NA	NA	NA	NA	NA	NA	NA	NA	NA	NA	F15K9.15|F15K9_15	0	0	0
AT1G03270	0	0	0	0	0	0	1	0	0	0	0	0	0	0	0	0	1	0	NA	NA	NA	NA	NA	NA	53.1	NA	NA	NA	NA	NA	NA	NA	NA	NA	344.1	NA	F15K9.13|F15K9_13	0	0	0
AT1G03280	0	0	0	0	0	0	0	1	0	0	0	0	0	0	0	0	0	0	NA	NA	NA	NA	NA	NA	NA	264.7	NA	NA	NA	NA	NA	NA	NA	NA	NA	NA	F15K9.12|F15K9_12	0	0	0
AT1G03290	0	1	1	1	1	0	1	1	0	0	1	1	0	0	0	0	0	1	NA	79	92.8	87.3	65.8	NA	88.5	289.5	NA	NA	81.8	93.3	NA	NA	NA	NA	NA	66.1	F15K9.11|F15K9_11	0	0	0
AT1G03300	0	0	1	0	0	0	0	0	0	0	0	0	0	0	0	0	0	1	NA	NA	121	NA	NA	NA	NA	NA	NA	NA	NA	NA	NA	NA	NA	NA	NA	127.5	DOMAIN OF UNKNOWN FUNCTION 724 1|DUF1|F15K9.10|F15K9_10	0	0	0
AT1G03310	0	1	0	1	1	1	1	0	0	0	1	0	0	0	0	0	0	0	NA	128.5	NA	137	80.5	87.5	61	NA	NA	NA	147.4	NA	NA	NA	NA	NA	NA	NA	ARABIDOPSIS THALIANA ISOAMYLASE 2|ATISA2|AtBE2|BE2|BRANCHING ENZYME 2|F15K9.9|F15K9_9|ISA2|debranching enzyme 1	0	0	0
AT1G03330	0	0	1	1	0	0	0	0	0	0	0	0	0	0	0	0	0	0	NA	NA	93.4	79.3	NA	NA	NA	NA	NA	NA	NA	NA	NA	NA	NA	NA	NA	NA	F15K9.7|F15K9_7|SM-like 2	0	0	0
AT1G03340	0	0	0	0	0	0	0	1	0	0	0	0	0	0	0	0	0	0	NA	NA	NA	NA	NA	NA	NA	125.4	NA	NA	NA	NA	NA	NA	NA	NA	NA	NA	F15K9.6|F15K9_6	0	0	0
AT1G03370	0	1	1	1	1	1	0	0	0	0	0	1	0	0	0	0	0	1	NA	98.5	144.4	147.5	102.6	78.2	NA	NA	NA	NA	NA	93.6	NA	NA	NA	NA	NA	117.9	F15K9.2|F15K9_2	0	0	0
AT1G03380	0	0	0	0	0	0	0	1	0	0	0	0	0	0	0	0	0	0	NA	NA	NA	NA	NA	NA	NA	162.1	NA	NA	NA	NA	NA	NA	NA	NA	NA	NA	ATATG18G|F21B7.1|homolog of yeast autophagy 18 (ATG18) G	0	0	0
AT1G03400	0	0	0	0	0	0	0	0	0	0	0	0	0	0	0	0	0	1	NA	NA	NA	NA	NA	NA	NA	NA	NA	NA	NA	NA	NA	NA	NA	NA	NA	80.9	F21B7.39|F21B7_39	0	0	0
AT1G03430	0	0	0	0	0	0	0	1	0	0	0	0	0	0	0	0	0	0	NA	NA	NA	NA	NA	NA	NA	132.4	NA	NA	NA	NA	NA	NA	NA	NA	NA	NA	F21B7.5|histidine-containing phosphotransfer factor 5	0	0	0
AT1G03440	0	0	0	0	0	0	1	0	0	0	0	0	0	0	0	0	1	0	NA	NA	NA	NA	NA	NA	78.7	NA	NA	NA	NA	NA	NA	NA	NA	NA	227.6	NA	F21B7.6|F21B7_6	0	0	0
AT1G03445	0	0	0	0	0	0	0	1	0	0	0	0	0	0	0	0	0	0	NA	NA	NA	NA	NA	NA	NA	122.4	NA	NA	NA	NA	NA	NA	NA	NA	NA	NA	BRI1 SUPPRESSOR 1|F21B7.7	0	0	0
AT1G03457	0	1	1	1	1	1	1	1	0	0	1	1	0	0	0	0	0	1	NA	169.7	380.5	372.3	167.9	173.8	100.3	136.9	NA	NA	163.2	169.2	NA	NA	NA	NA	NA	341.4	AtBRN2|BRN2|Bruno-like 2|F21B7.8	0	0	0
AT1G03470	0	0	0	0	0	0	1	0	0	0	0	0	0	0	0	0	1	0	NA	NA	NA	NA	NA	NA	120	NA	NA	NA	NA	NA	NA	NA	NA	NA	153.7	NA	F21B7.9|Networked 3A	0	0	1
AT1G03475	0	0	0	0	0	0	0	1	0	0	0	0	0	0	0	0	0	0	NA	NA	NA	NA	NA	NA	NA	54.9	NA	NA	NA	NA	NA	NA	NA	NA	NA	NA	ATCPO-I|COPROPORPHYRINOGEN III OXIDASE|CPO|F21B7.10|HEMF1|LESION INITIATION 2	0	0	0
AT1G03515	0	1	1	0	0	0	1	0	0	0	1	0	0	0	0	0	0	0	NA	121.8	86.6	NA	NA	NA	102.3	NA	NA	NA	133.4	NA	NA	NA	NA	NA	NA	NA	50828.TRNA-ASP-1	0	0	0
AT1G03520	0	0	0	0	0	0	0	0	0	0	1	1	0	0	0	0	0	1	NA	NA	NA	NA	NA	NA	NA	NA	NA	NA	187.5	191.6	NA	NA	NA	NA	NA	110	F21B7.14	0	0	0
AT1G03540	0	0	0	0	0	0	0	0	0	0	0	0	1	0	0	0	0	0	NA	NA	NA	NA	NA	NA	NA	NA	NA	NA	NA	NA	55.4	NA	NA	NA	NA	NA	F21B7.16	0	0	0
AT1G03580	0	0	0	0	0	0	0	0	1	0	1	1	0	0	0	0	0	1	NA	NA	NA	NA	NA	NA	NA	NA	131.3	NA	311.1	270.1	NA	NA	NA	NA	NA	178.2	-	0	0	0
AT1G03590	0	0	0	1	0	0	0	1	0	0	0	0	0	0	0	0	0	0	NA	NA	NA	254.8	NA	NA	NA	148.6	NA	NA	NA	NA	NA	NA	NA	NA	NA	NA	F21B7.20	0	0	0
AT1G03600	0	0	0	0	0	0	0	1	0	0	0	0	0	0	0	0	0	0	NA	NA	NA	NA	NA	NA	NA	287.7	NA	NA	NA	NA	NA	NA	NA	NA	NA	NA	F21B7.21	0	0	0
AT1G03610	0	0	0	0	1	1	0	0	0	0	0	0	0	0	0	0	1	1	NA	NA	NA	NA	198.5	194.1	NA	NA	NA	NA	NA	NA	NA	NA	NA	NA	188	267	F21B7.22	0	0	0
AT1G03620	0	0	1	1	0	0	0	1	1	0	0	1	0	0	0	0	0	0	NA	NA	280.3	253.1	NA	NA	NA	621.9	93.6	NA	NA	179.7	NA	NA	NA	NA	NA	NA	F21B7.23	0	0	0
AT1G03630	0	0	0	0	0	0	0	0	0	0	0	0	1	0	0	0	0	0	NA	NA	NA	NA	NA	NA	NA	NA	NA	NA	NA	NA	52.4	NA	NA	NA	NA	NA	F21B7.24|NADPH:PROTOCHLOROPHYLLIDE OXIDOREDUCTASE|PORC|protochlorophyllide oxidoreductase C	0	0	0
AT1G03640	0	0	1	1	0	0	0	0	0	0	0	0	0	0	0	0	0	0	NA	NA	106.4	88.2	NA	NA	NA	NA	NA	NA	NA	NA	NA	NA	NA	NA	NA	NA	50828.TRNA-PHE-1	0	0	0
AT1G03660	0	0	0	0	0	0	0	1	0	0	0	0	0	0	0	0	0	0	NA	NA	NA	NA	NA	NA	NA	111.4	NA	NA	NA	NA	NA	NA	NA	NA	NA	NA	F21B7.26|F21B7_26	0	0	0
AT1G03687	0	1	0	0	0	0	0	1	0	0	0	0	0	0	0	0	0	0	NA	100.9	NA	NA	NA	NA	NA	181.6	NA	NA	NA	NA	NA	NA	NA	NA	NA	NA	F21B7.29|F21B7_29	0	0	0
AT1G03720	0	0	0	0	0	0	0	1	0	0	0	0	1	0	0	0	0	0	NA	NA	NA	NA	NA	NA	NA	199.1	NA	NA	NA	NA	72.5	NA	NA	NA	NA	NA	F21B7.32	0	0	0
AT1G03730	0	0	1	1	0	0	1	1	0	0	1	1	0	0	0	0	0	1	NA	NA	249	237.8	NA	NA	92.5	136.9	NA	NA	214.3	180.7	NA	NA	NA	NA	NA	184.7	F21B7.33	0	0	0
AT1G03740	0	0	1	1	0	0	0	0	0	0	0	0	0	0	0	0	0	0	NA	NA	319.1	269.9	NA	NA	NA	NA	NA	NA	NA	NA	NA	NA	NA	NA	NA	NA	F21B7.34	0	0	0
AT1G03760	0	0	0	0	0	0	0	0	0	0	0	0	0	0	0	0	0	1	NA	NA	NA	NA	NA	NA	NA	NA	NA	NA	NA	NA	NA	NA	NA	NA	NA	60.3	F21M11.33|F21M11_33	0	0	0
AT1G03770	0	0	0	0	0	0	0	1	0	0	0	0	0	0	0	0	0	0	NA	NA	NA	NA	NA	NA	NA	337.4	NA	NA	NA	NA	NA	NA	NA	NA	NA	NA	ARABIDOPSIS THALIANA RING 1B|ATRING1B|F21M11.32|F21M11_32|RING 1B	0	0	0
AT1G03790	0	0	0	0	0	1	0	0	0	0	0	0	0	0	0	0	0	0	NA	NA	NA	NA	NA	195	NA	NA	NA	NA	NA	NA	NA	NA	NA	NA	NA	NA	AtTZF4|F21M11.30|F21M11_30|SOMNUS|TZF4|Tandem CCCH Zinc Finger protein 4	0	0	0
AT1G03800	0	1	1	1	1	1	1	0	0	0	1	1	0	0	0	0	0	1	NA	166.6	415.3	372.4	268.3	206	157.4	NA	NA	NA	194.8	204.1	NA	NA	NA	NA	NA	231.3	ARABIDOPSIS THALIANA RF DOMAIN PROTEIN 10|ATERF10|ERF domain protein 10|F21M11.29|F21M11_29	0	0	0
AT1G03820	0	1	0	0	0	0	0	0	0	0	0	0	0	0	0	0	0	0	NA	124.6	NA	NA	NA	NA	NA	NA	NA	NA	NA	NA	NA	NA	NA	NA	NA	NA	F21M11.27|F21M11_27	0	0	1
AT1G03830	0	0	0	0	0	0	1	0	0	0	0	0	0	0	0	0	0	0	NA	NA	NA	NA	NA	NA	45.2	NA	NA	NA	NA	NA	NA	NA	NA	NA	NA	NA	F21M11.26|F21M11_26	0	0	0
AT1G03840	0	0	0	0	1	1	0	1	0	0	0	0	1	0	0	0	0	1	NA	NA	NA	NA	92.8	117.6	NA	260.5	NA	NA	NA	NA	52	NA	NA	NA	NA	139.2	F21M11.25|F21M11_25|IDD3|INDETERMINATE DOMAIN 3|Magpie	0	0	1
AT1G03850	0	0	1	1	1	1	0	1	0	0	0	0	1	0	0	0	0	0	NA	NA	452.7	457.1	219.1	182	NA	111.1	NA	NA	NA	NA	66.8	NA	NA	NA	NA	NA	ATGRXS13|F21M11.22|F21M11_22|glutaredoxin 13	0	0	1
AT1G03870	0	1	1	1	1	1	1	0	0	0	1	1	0	0	0	0	0	1	NA	174.7	421.8	486.6	177.3	179.7	123.9	NA	NA	NA	262.2	245.9	NA	NA	NA	NA	NA	494.9	F21M11.20|F21M11_20|FASCICLIN-like arabinoogalactan 9	0	0	1
AT1G03880	0	0	0	0	0	0	0	1	0	0	0	0	0	0	0	0	0	0	NA	NA	NA	NA	NA	NA	NA	145.4	NA	NA	NA	NA	NA	NA	NA	NA	NA	NA	CRB|CRUCIFERIN B|F21M11.19|F21M11_19|cruciferin 2	0	0	0
AT1G03905	0	1	1	1	1	1	1	0	0	0	1	1	0	0	0	0	0	1	NA	96	180.8	176	134.7	99.9	123.9	NA	NA	NA	93.6	112	NA	NA	NA	NA	NA	121	ATP-binding cassette I19	0	0	0
AT1G03910	0	0	0	0	0	0	0	1	0	0	0	0	0	0	0	0	0	0	NA	NA	NA	NA	NA	NA	NA	104.9	NA	NA	NA	NA	NA	NA	NA	NA	NA	NA	CACTIN|CTN|F21M11.16|F21M11_16	0	0	0
AT1G03930	1	0	0	0	0	0	0	1	0	0	0	0	0	0	0	0	0	0	117.1	NA	NA	NA	NA	NA	NA	126.9	NA	NA	NA	NA	NA	NA	NA	NA	NA	NA	CASEIN KINASE I-LIKE 9 ALPHA|CASEIN KINASE I-LIKE 9 BETA|CKL9ALPHA|CKL9BETA|DUAL SPECIFICITY KINASE 1|F21M11.14|F21M11_14|dual specificity kinase 1	0	0	0
AT1G03940	0	0	1	1	0	0	0	0	0	0	0	0	0	0	0	0	0	0	NA	NA	63.5	76.7	NA	NA	NA	NA	NA	NA	NA	NA	NA	NA	NA	NA	NA	NA	F21M11.13|F21M11_13	0	0	0
AT1G03960	0	0	0	0	0	0	0	1	0	0	0	0	0	0	0	0	0	0	NA	NA	NA	NA	NA	NA	NA	61.9	NA	NA	NA	NA	NA	NA	NA	NA	NA	NA	F21M11.11|F21M11_11	0	0	0
AT1G03980	0	0	1	1	1	0	0	0	0	0	0	0	0	0	0	0	0	1	NA	NA	186.5	213.6	104.1	NA	NA	NA	NA	NA	NA	NA	NA	NA	NA	NA	NA	115.8	ATPCS2|F21M11.9|F21M11_9|phytochelatin synthase 2	0	0	0
AT1G03982	0	0	0	0	0	0	0	1	0	0	0	0	0	0	0	0	0	0	NA	NA	NA	NA	NA	NA	NA	61.9	NA	NA	NA	NA	NA	NA	NA	NA	NA	NA	-	0	0	0
AT1G03990	0	0	0	0	0	1	0	0	0	0	0	0	0	0	0	0	0	1	NA	NA	NA	NA	NA	120.4	NA	NA	NA	NA	NA	NA	NA	NA	NA	NA	NA	153.2	F21M11.7|F21M11_7	0	0	0
AT1G04000	1	1	1	1	1	1	1	1	1	0	1	1	0	1	0	0	0	1	128.7	307	242.3	236.1	142.1	160	214.4	82.4	133.3	NA	432.3	438.1	NA	80.8	NA	NA	NA	241.3	F21M11.6|F21M11_6	0	0	0
AT1G04010	0	1	1	0	0	0	0	0	0	0	1	1	0	0	0	0	1	1	NA	118.6	66.2	NA	NA	NA	NA	NA	NA	NA	90.2	91.8	NA	NA	NA	NA	215	78.5	ATPSAT1|ERP1|F21M11.5|F21M11_5|enhanced response to Phytophthora 1|phospholipid sterol acyl transferase 1	0	0	0
AT1G04040	0	0	0	0	0	0	0	1	0	0	0	0	0	0	0	0	0	0	NA	NA	NA	NA	NA	NA	NA	306	NA	NA	NA	NA	NA	NA	NA	NA	NA	NA	F21M11.2|F21M11_2	0	0	0
AT1G04050	0	1	1	1	1	0	0	0	0	0	1	0	0	0	0	0	0	1	NA	121	203.4	160.5	89.4	NA	NA	NA	NA	NA	95.6	NA	NA	NA	NA	NA	NA	139.5	AT1G04060|F21M11.35|F21M11_35|SDG13|SET DOMAIN PROTEIN 13|homolog of SU(var)3-9 1	0	0	0
AT1G04080	0	0	0	0	0	0	0	1	0	0	0	0	0	0	0	0	0	0	NA	NA	NA	NA	NA	NA	NA	298	NA	NA	NA	NA	NA	NA	NA	NA	NA	NA	F20D22.14	0	0	0
AT1G04100	0	1	0	0	0	0	1	1	0	0	1	1	0	1	1	0	0	0	NA	94.9	NA	NA	NA	NA	112.1	183.6	NA	NA	160.4	147	NA	200.6	88.6	NA	NA	NA	AUXIN-INDUCED PROTEIN 10|F20D22.13|F20D22_13|indoleacetic acid-induced protein 10	1	1	1
AT1G04110	0	0	1	1	0	0	1	0	0	0	0	0	0	0	0	0	0	0	NA	NA	60.6	59.3	NA	NA	84.6	NA	NA	NA	NA	NA	NA	NA	NA	NA	NA	NA	AtSDD1|F20D22.12|F20D22_12|STOMATAL DENSITY AND DISTRIBUTION|STOMATAL DENSITY AND DISTRIBUTION 1	0	0	0
AT1G04120	0	0	1	1	1	0	0	0	0	0	0	0	0	0	0	0	0	1	NA	NA	292.6	264	127.5	NA	NA	NA	NA	NA	NA	NA	NA	NA	NA	NA	NA	129.9	ARABIDOPSIS THALIANA ATP BINDING CASSETTE TRANSPORTER C5|ATABCC5|ATMRP5|ATP BINDING CASSETTE TRANSPORTER C5|ATP-binding cassette C5|Arabidopsis thaliana ATP-binding cassette C5|MULTIDRUG RESISTANCE PROTEIN 5|multidrug resistance-associated protein 5	0	0	0
AT1G04130	0	1	0	0	0	0	0	1	0	0	1	1	0	0	0	0	0	1	NA	148.2	NA	NA	NA	NA	NA	147.9	NA	NA	147.7	130.3	NA	NA	NA	NA	NA	141.5	AtTPR2|F20D22.10|F20D22_10|tetratricopeptide repeat 2	0	0	1
AT1G04140	0	0	0	0	0	0	0	1	0	0	0	0	0	0	0	0	1	0	NA	NA	NA	NA	NA	NA	NA	134.9	NA	NA	NA	NA	NA	NA	NA	NA	291.9	NA	F20D22.9|F20D22_9	0	0	0
AT1G04150	0	1	1	1	1	1	1	1	1	0	1	1	0	0	0	0	0	1	NA	212.1	357	358.3	217.9	236.9	102.3	566	122.1	NA	247.7	218.2	NA	NA	NA	NA	NA	417.8	F20D22.8|F20D22_8	0	0	0
AT1G04160	0	0	0	0	0	0	0	1	0	0	0	0	0	0	0	0	0	0	NA	NA	NA	NA	NA	NA	NA	290.7	NA	NA	NA	NA	NA	NA	NA	NA	NA	NA	ARABIDOPSIS THALIANA MYOSIN XI B|ATXIB|F20D22.7|F20D22_7|MYOSIN XI B|MYOSIN XI-8|XI-8|XI-B|myosin XI B	0	0	0
AT1G04170	0	0	0	0	0	0	1	1	0	0	0	0	0	0	0	0	0	0	NA	NA	NA	NA	NA	NA	61	258.3	NA	NA	NA	NA	NA	NA	NA	NA	NA	NA	F20D22.6|F20D22_6|eukaryotic translation initiation factor 2 gamma subunit	0	0	0
AT1G04180	0	0	0	1	0	0	1	0	0	0	0	0	0	0	0	0	1	0	NA	NA	NA	98.3	NA	NA	68.9	NA	NA	NA	NA	NA	NA	NA	NA	NA	162.9	NA	F20D22.5|F20D22_5|YUCCA 9	1	0	0
AT1G04190	0	0	0	0	0	0	1	1	0	0	0	0	0	0	0	0	0	0	NA	NA	NA	NA	NA	NA	63	779.8	NA	NA	NA	NA	NA	NA	NA	NA	NA	NA	F20D22.4|F20D22_4|tetratricopeptide repeat 3	0	0	1
AT1G04210	0	1	1	1	0	0	0	0	0	0	1	0	0	0	0	0	0	1	NA	111.5	82.4	75.3	NA	NA	NA	NA	NA	NA	112.2	NA	NA	NA	NA	NA	NA	76.4	F20D22.2|F20D22_2	0	0	0
AT1G04230	0	0	0	0	0	0	0	1	0	0	0	0	0	0	0	0	0	0	NA	NA	NA	NA	NA	NA	NA	247.8	NA	NA	NA	NA	NA	NA	NA	NA	NA	NA	-	0	0	0
AT1G04240	1	1	1	1	1	1	1	1	1	1	1	1	1	1	1	0	1	1	329.5	195.2	197.7	184.3	216.6	234.2	344.3	243	181.5	260.1	346.4	357.4	110.9	212.6	170.6	NA	300.1	320.1	F19P19.32|F19P19_32|IAA3|SHORT HYPOCOTYL 2|indole-3-acetic acid inducible 3	1	1	1
AT1G04250	0	0	0	0	0	0	0	1	1	0	0	0	0	0	0	0	0	0	NA	NA	NA	NA	NA	NA	NA	114.4	84.3	NA	NA	NA	NA	NA	NA	NA	NA	NA	AUXIN RESISTANT 3|AtIAA17|F19P19.31|F19P19_31|IAA17|indole-3-acetic acid inducible 17	1	1	0
AT1G04260	0	0	0	0	0	0	1	0	0	0	0	0	0	0	0	0	0	0	NA	NA	NA	NA	NA	NA	108.2	NA	NA	NA	NA	NA	NA	NA	NA	NA	NA	NA	CAMV MOVEMENT PROTEIN INTERACTING PROTEIN 7|CAMV movement protein interacting protein 7|F19P19.30|F19P19_30|MPIP7|PRA1.D|PRENYLATED RAB ACCEPTOR 1.D	0	0	0
AT1G04270	0	0	0	0	0	0	1	0	0	0	0	0	0	0	0	0	1	0	NA	NA	NA	NA	NA	NA	106.2	NA	NA	NA	NA	NA	NA	NA	NA	NA	226.2	NA	F19P19.29|F19P19_29|RIBOSOMAL PROTEIN S15|cytosolic ribosomal protein S15	0	0	0
AT1G04280	0	0	1	1	0	0	0	0	0	0	0	0	0	0	0	0	0	0	NA	NA	137.7	124	NA	NA	NA	NA	NA	NA	NA	NA	NA	NA	NA	NA	NA	NA	F19P19.28|F19P19_28	0	0	0
AT1G04300	0	0	0	0	0	0	0	1	0	0	0	0	0	0	0	0	0	0	NA	NA	NA	NA	NA	NA	NA	141.4	NA	NA	NA	NA	NA	NA	NA	NA	NA	NA	F19P19.26|F19P19_26	0	0	0
AT1G04310	0	1	1	1	1	1	1	0	0	0	1	1	0	0	0	0	0	1	NA	147.5	272.5	297.5	200.2	268.5	110.2	NA	NA	NA	125.4	150.2	NA	NA	NA	NA	NA	159.4	ERS2 PROTEIN|F19P19.25|F19P19_25|ethylene response sensor 2	0	0	1
AT1G04320	0	0	0	0	0	0	0	1	0	0	0	0	0	0	0	0	0	0	NA	NA	NA	NA	NA	NA	NA	199.3	NA	NA	NA	NA	NA	NA	NA	NA	NA	NA	51096.TRNA-GLY-1	0	0	0
AT1G04340	0	0	0	0	0	0	0	0	0	0	0	0	1	0	0	0	0	0	NA	NA	NA	NA	NA	NA	NA	NA	NA	NA	NA	NA	55.8	NA	NA	NA	NA	NA	F19P19.23|F19P19_23	0	0	0
AT1G04360	0	0	0	0	1	1	0	1	0	0	0	0	0	0	0	0	0	1	NA	NA	NA	NA	136.8	156.5	NA	395.9	NA	NA	NA	NA	NA	NA	NA	NA	NA	263.9	ARABIDOPSIS TOXICOS EN LEVADURA 1|ATL1|F19P19.21|F19P19_21	0	0	0
AT1G04370	0	0	1	1	1	0	0	1	0	0	0	0	0	0	0	0	0	1	NA	NA	627.5	645.5	150.1	NA	NA	796.7	NA	NA	NA	NA	NA	NA	NA	NA	NA	360.9	ATERF14|Ethylene-responsive element binding factor 14|F19P19.19|F19P19_19	0	0	0
AT1G04380	0	0	0	0	0	0	0	1	0	0	0	0	0	0	0	0	0	0	NA	NA	NA	NA	NA	NA	NA	114.6	NA	NA	NA	NA	NA	NA	NA	NA	NA	NA	F19P19.18|F19P19_18	0	0	0
AT1G04400	0	0	1	1	1	1	0	1	0	0	1	1	0	0	0	0	0	1	NA	NA	202.7	215.8	140.3	118.1	NA	469.3	NA	NA	173.9	152.8	NA	NA	NA	NA	NA	139.8	AT-PHH1|ATCRY2|CRYPTOCHROME 2 APOPROTEIN|F19P19.14|F19P19_14|FHA|PHH1|cryptochrome 2	0	0	0
AT1G04430	0	0	0	0	0	0	0	0	0	0	0	0	0	0	0	0	0	1	NA	NA	NA	NA	NA	NA	NA	NA	NA	NA	NA	NA	NA	NA	NA	NA	NA	122	F19P19.11|F19P19_11	0	0	0
AT1G04440	0	0	1	1	0	0	0	0	0	0	0	0	0	0	0	0	0	0	NA	NA	166.8	168.2	NA	NA	NA	NA	NA	NA	NA	NA	NA	NA	NA	NA	NA	NA	F19P19.10|F19P19_10|casein kinase like 13	0	0	0
AT1G04470	0	0	0	0	0	0	0	1	0	0	0	0	0	0	0	0	0	0	NA	NA	NA	NA	NA	NA	NA	2647	NA	NA	NA	NA	NA	NA	NA	NA	NA	NA	F19P19.7|F19P19_7	0	0	0
AT1G04480	0	1	1	0	0	0	0	0	0	0	1	1	0	0	0	0	0	0	NA	117.2	73.7	NA	NA	NA	NA	NA	NA	NA	93.1	107.2	NA	NA	NA	NA	NA	NA	F19P19.5|F19P19_5	0	0	0
AT1G04490	0	0	1	1	1	1	0	0	0	0	0	0	0	0	0	0	0	1	NA	NA	188.5	189.6	125.1	113.7	NA	NA	NA	NA	NA	NA	NA	NA	NA	NA	NA	154.9	F19P19.4|F19P19_4	0	0	0
AT1G04501	0	0	1	0	0	0	1	0	0	0	1	1	0	0	0	0	1	1	NA	NA	118	NA	NA	NA	57.1	NA	NA	NA	127.7	110.1	NA	NA	NA	NA	308.8	117.6	NoInfo	0	0	0
AT1G04520	0	0	0	0	0	1	0	0	0	0	0	0	0	0	0	0	0	0	NA	NA	NA	NA	NA	97.4	NA	NA	NA	NA	NA	NA	NA	NA	NA	NA	NA	NA	F19P19.1|F19P19_1|plasmodesmata-located protein 2	0	0	0
AT1G04530	1	1	1	1	1	0	1	0	1	0	1	1	0	0	0	0	1	1	217.8	358.9	314.1	377.8	131.1	NA	139.7	NA	129.3	NA	281.5	233.9	NA	NA	NA	NA	170.6	428.4	T1G11.22|T1G11_22|tetratricopeptide repeat 4	0	0	0
AT1G04550	0	0	1	1	1	1	1	1	0	0	1	1	0	0	0	0	0	1	NA	NA	289.2	281.4	181.5	209.4	123.9	179.3	NA	NA	183.7	187.8	NA	NA	NA	NA	NA	194	BDL|BODENLOS|T1G11.20|T1G11_20|indole-3-acetic acid inducible 12	1	1	1
AT1G04560	0	0	0	0	0	0	0	1	0	0	0	0	0	0	0	0	0	0	NA	NA	NA	NA	NA	NA	NA	474.6	NA	NA	NA	NA	NA	NA	NA	NA	NA	NA	T1G11.19|T1G11_19	0	0	0
AT1G04570	0	1	1	1	0	0	0	1	0	0	1	0	0	0	0	0	0	1	NA	78.7	195.1	177.9	NA	NA	NA	188.1	NA	NA	117	NA	NA	NA	NA	NA	NA	119.3	T1G11.18|T1G11_18	0	0	0
AT1G04580	0	0	0	0	0	0	0	1	0	0	0	0	1	0	0	0	0	0	NA	NA	NA	NA	NA	NA	NA	112.1	NA	NA	NA	NA	40.3	NA	NA	NA	NA	NA	AAO4|ALDEHYDE OXIDASE 2|ALDEHYDE OXIDASE 4|ATAO-4|ATAO2|T1G11.17|T1G11_17|aldehyde oxidase 4|arabdopsis thaliana aldehyde oxidase 4	1	0	0
AT1G04590	0	1	1	1	0	0	1	0	0	0	0	0	0	0	0	0	0	0	NA	91	38.8	43.9	NA	NA	49.2	NA	NA	NA	NA	NA	NA	NA	NA	NA	NA	NA	T1G11.16|T1G11_16	0	0	1
AT1G04600	0	0	0	0	0	0	0	1	0	0	0	0	0	0	0	0	0	0	NA	NA	NA	NA	NA	NA	NA	170.3	NA	NA	NA	NA	NA	NA	NA	NA	NA	NA	ATXIA|T1G11.15|T1G11_15|myosin XI A	0	0	0
AT1G04610	1	0	1	0	1	1	1	0	0	0	1	1	0	0	0	0	0	1	148.1	NA	110.7	NA	96.8	101.6	49.2	NA	NA	NA	90.5	94.4	NA	NA	NA	NA	NA	80.2	T1G11.14|T1G11_14|YUCCA 3	1	0	0
AT1G04620	0	0	0	0	0	0	0	1	0	0	0	0	0	0	0	0	0	0	NA	NA	NA	NA	NA	NA	NA	378.1	NA	NA	NA	NA	NA	NA	NA	NA	NA	NA	7-hydroxymethyl chlorophyll a (HMChl) reductase|T1G11.13|T1G11_13	0	0	0
AT1G04630	0	1	0	0	0	0	1	1	0	0	0	0	0	0	0	0	0	0	NA	101.3	NA	NA	NA	NA	61	87.2	NA	NA	NA	NA	NA	NA	NA	NA	NA	NA	T1G11.12|T1G11_12|maternal effect embryo arrest 4	0	0	0
AT1G04640	0	0	0	0	0	0	0	0	0	0	0	0	1	0	0	0	0	0	NA	NA	NA	NA	NA	NA	NA	NA	NA	NA	NA	NA	59.6	NA	NA	NA	NA	NA	lipoyltransferase 2	0	0	0
AT1G04645	0	0	0	1	0	0	0	0	0	0	0	0	0	0	0	0	0	0	NA	NA	NA	75.7	NA	NA	NA	NA	NA	NA	NA	NA	NA	NA	NA	NA	NA	NA	-	0	0	0
AT1G04650	0	0	0	0	1	0	1	1	0	0	1	1	0	0	0	0	0	1	NA	NA	NA	NA	78.3	NA	66.9	162.8	NA	NA	111.1	118.6	NA	NA	NA	NA	NA	210.8	T1G11.9|T1G11_9	0	0	0
AT1G04670	0	0	0	0	0	0	0	1	0	0	0	0	0	0	0	0	0	0	NA	NA	NA	NA	NA	NA	NA	212	NA	NA	NA	NA	NA	NA	NA	NA	NA	NA	T1G11.23|T1G11_23	0	0	0
AT1G04680	0	0	0	1	0	0	1	0	0	0	0	0	0	0	0	0	0	0	NA	NA	NA	185.1	NA	NA	84.6	NA	NA	NA	NA	NA	NA	NA	NA	NA	NA	NA	T1G11.7|T1G11_7	0	0	1
AT1G04690	0	1	0	1	0	0	1	0	0	0	1	0	0	0	0	0	0	0	NA	156.7	NA	140.9	NA	NA	72.8	NA	NA	NA	135.6	NA	NA	NA	NA	NA	NA	NA	K+ CHANNEL BETA SUBUNIT PROTEIN|KV-BETA1|POTASSIUM CHANNEL BETA SUBUNIT HOMOLOG|T1G11.6|T1G11_6|potassium channel beta subunit 1	0	0	0
AT1G04710	0	0	1	1	0	0	1	0	0	0	0	0	0	0	0	0	0	0	NA	NA	65.7	77.4	NA	NA	66.9	NA	NA	NA	NA	NA	NA	NA	NA	NA	NA	NA	3-KETO-ACYL-COA THIOLASE 1|KAT1|T1G11.4|T1G11_4|peroxisomal 3-ketoacyl-CoA thiolase 4|peroxisomal 3-ketoacyl-CoA thiolase 4	1	0	0
AT1G04720	0	0	0	0	0	0	0	1	0	0	0	0	1	0	0	0	0	0	NA	NA	NA	NA	NA	NA	NA	600.7	NA	NA	NA	NA	55.1	NA	NA	NA	NA	NA	50893.TRNA-MET-1	0	0	0
AT1G04730	0	0	0	0	0	0	1	1	0	0	0	0	0	0	0	0	0	0	NA	NA	NA	NA	NA	NA	63	200.6	NA	NA	NA	NA	NA	NA	NA	NA	NA	NA	CHROMOSOME TRANSMISSION FIDELITY 18|T1G11.3|T1G11_3	0	0	0
AT1G04750	0	0	0	0	0	0	0	0	0	0	0	0	0	0	0	0	0	1	NA	NA	NA	NA	NA	NA	NA	NA	NA	NA	NA	NA	NA	NA	NA	NA	NA	101.8	AT VAMP7B|ATVAMP721|VAMP7B|VESICLE-ASSOCIATED MEMBRANE PROTEIN 7B|vesicle-associated membrane protein 721	0	0	0
AT1G04770	0	1	1	1	1	1	1	0	0	0	0	1	0	0	0	0	0	1	NA	175	224.9	218	179.6	195.4	70.8	NA	NA	NA	NA	172.8	NA	NA	NA	NA	NA	169.3	F13M7.24|F13M7_24	0	0	1
AT1G04780	0	0	1	1	0	0	0	1	0	0	0	0	0	0	0	0	0	0	NA	NA	172	163.7	NA	NA	NA	659.1	NA	NA	NA	NA	NA	NA	NA	NA	NA	NA	-	0	0	0
AT1G04790	0	0	0	0	0	0	1	0	0	0	0	0	0	0	0	0	0	0	NA	NA	NA	NA	NA	NA	86.6	NA	NA	NA	NA	NA	NA	NA	NA	NA	NA	NA	F13M7.22|F13M7_22	0	0	0
AT1G04810	0	1	0	0	0	0	0	0	0	0	0	0	0	0	0	0	0	0	NA	81.5	NA	NA	NA	NA	NA	NA	NA	NA	NA	NA	NA	NA	NA	NA	NA	NA	F13M7.20|F13M7_20	0	0	0
AT1G04820	0	1	1	1	0	0	1	1	0	0	1	1	1	0	0	0	0	0	NA	127	78.4	84.4	NA	NA	98.4	81.9	NA	NA	99.7	97.3	72.5	NA	NA	NA	NA	NA	F13M7.19|TOR2|TORTIFOLIA 2|tubulin alpha-4 chain	0	0	0
AT1G04830	0	0	0	0	0	0	1	0	0	0	0	0	0	0	0	0	0	0	NA	NA	NA	NA	NA	NA	82.6	NA	NA	NA	NA	NA	NA	NA	NA	NA	NA	NA	F13M7.18|F13M7_18	0	0	0
AT1G04850	0	1	0	0	0	0	0	0	0	0	1	0	0	0	0	0	0	0	NA	88.2	NA	NA	NA	NA	NA	NA	NA	NA	96.6	NA	NA	NA	NA	NA	NA	NA	F13M7.16|F13M7_16	0	0	0
AT1G04860	0	0	0	0	0	0	0	1	0	0	0	0	0	0	0	0	0	0	NA	NA	NA	NA	NA	NA	NA	147.4	NA	NA	NA	NA	NA	NA	NA	NA	NA	NA	ATUBP2|F13M7.15|F13M7_15|UBIQUITIN-SPECIFIC PROTEASE 2|ubiquitin-specific protease 2	0	0	0
AT1G04870	0	1	0	0	0	0	0	0	0	0	0	0	0	0	0	0	0	0	NA	72.3	NA	NA	NA	NA	NA	NA	NA	NA	NA	NA	NA	NA	NA	NA	NA	NA	ATPRMT10|F13M7.14|F13M7_14|protein arginine methyltransferase 10	0	0	0
AT1G04945	0	0	0	0	0	0	0	1	0	0	0	0	0	0	0	0	0	0	NA	NA	NA	NA	NA	NA	NA	66.7	NA	NA	NA	NA	NA	NA	NA	NA	NA	NA	-	0	0	1
AT1G04950	0	0	0	1	0	0	0	0	0	0	0	0	0	0	0	0	0	0	NA	NA	NA	75.5	NA	NA	NA	NA	NA	NA	NA	NA	NA	NA	NA	NA	NA	NA	ATTAF6|EMB2781|EMBRYO DEFECTIVE 2781|F13M7.6|F13M7_6|TAF6|TATA BOX ASSOCIATED FACTOR II 59|TBP-associated factor 6	0	0	0
AT1G04960	0	0	1	1	0	0	0	0	0	0	1	0	0	0	0	0	0	0	NA	NA	88.3	92	NA	NA	NA	NA	NA	NA	104.9	NA	NA	NA	NA	NA	NA	NA	F13M7.5|F13M7_5	0	0	0
AT1G04970	0	1	0	0	0	0	0	0	0	0	0	0	0	0	0	0	0	0	NA	108.7	NA	NA	NA	NA	NA	NA	NA	NA	NA	NA	NA	NA	NA	NA	NA	NA	F13M7.4|F13M7_4	0	0	0
AT1G04980	0	0	1	1	1	1	0	0	0	0	0	0	0	0	0	0	0	1	NA	NA	137.5	116.6	146.9	135.8	NA	NA	NA	NA	NA	NA	NA	NA	NA	NA	NA	113.4	ARABIDOPSIS THALIANA PROTEIN DISULFIDE ISOMERASE 10|ATPDI10|ATPDIL2-2|F13M7.3|F13M7_3|PDI-like 2-2|PDI10|PROTEIN DISULFIDE ISOMERASE	0	0	0
AT1G04990	0	0	0	0	0	0	1	1	0	0	0	0	0	0	0	0	0	0	NA	NA	NA	NA	NA	NA	114.1	129.9	NA	NA	NA	NA	NA	NA	NA	NA	NA	NA	F13M7.1|F13M7_1	0	0	0
AT1G05000	0	0	1	1	1	1	0	0	0	0	0	0	0	0	0	0	0	1	NA	NA	568.9	551.4	201.2	177	NA	NA	NA	NA	NA	NA	NA	NA	NA	NA	NA	307.8	AtPFA-DSP1|T7A14.14|T7A14_14|plant and fungi atypical dual-specificity phosphatase 1	0	0	0
AT1G05010	0	0	1	0	0	0	0	0	0	0	0	0	0	0	0	0	1	1	NA	NA	160.6	NA	NA	NA	NA	NA	NA	NA	NA	NA	NA	NA	NA	NA	253.7	215.2	1-AMINOCYCLOPROPANE-1-CARBOXYLATE OXIDASE|ACO4|EAT1|ETHYLENE-FORMING ENZYME|T7A14.12|T7A14_12|ethylene forming enzyme|ethylene-forming enzyme	0	0	1
AT1G05020	0	0	0	0	0	0	0	1	0	0	0	0	0	0	0	0	0	0	NA	NA	NA	NA	NA	NA	NA	97.7	NA	NA	NA	NA	NA	NA	NA	NA	NA	NA	T7A14.11|T7A14_11	0	0	0
AT1G05030	0	0	0	0	0	0	0	0	0	0	0	0	1	0	0	0	0	0	NA	NA	NA	NA	NA	NA	NA	NA	NA	NA	NA	NA	55.1	NA	NA	NA	NA	NA	T7A14.10|T7A14_10	0	0	0
AT1G05040	0	0	0	0	0	0	0	1	0	0	0	0	0	0	0	0	0	1	NA	NA	NA	NA	NA	NA	NA	91.4	NA	NA	NA	NA	NA	NA	NA	NA	NA	61.7	T7A14.9|T7A14_9	0	0	0
AT1G05055	0	0	0	0	0	0	0	1	0	0	0	0	0	0	0	0	0	0	NA	NA	NA	NA	NA	NA	NA	132.1	NA	NA	NA	NA	NA	NA	NA	NA	NA	NA	AT1G05050|ATGTF2H2|general transcription factor II H2	0	0	0
AT1G05065	0	0	1	1	0	0	1	0	0	0	0	0	0	0	0	0	1	0	NA	NA	141.9	131.4	NA	NA	80.7	NA	NA	NA	NA	NA	NA	NA	NA	NA	116	NA	CLAVATA3/ESR-RELATED 20	0	0	0
AT1G05085	0	0	0	0	0	0	0	1	0	0	0	0	0	0	0	0	0	0	NA	NA	NA	NA	NA	NA	NA	258	NA	NA	NA	NA	NA	NA	NA	NA	NA	NA	-	0	0	0
AT1G05090	0	0	1	1	0	0	1	0	0	0	0	0	0	0	0	0	0	0	NA	NA	74.8	74.1	NA	NA	59	NA	NA	NA	NA	NA	NA	NA	NA	NA	NA	NA	T7A14.3|T7A14_3	0	0	0
AT1G05100	0	1	1	1	1	1	1	1	0	0	1	1	0	0	0	0	0	1	NA	123.9	283	299.7	193.1	159.4	76.7	243.3	NA	NA	161	128.7	NA	NA	NA	NA	NA	225.2	T7A14.2|T7A14_2|mitogen-activated protein kinase kinase kinase 18	0	0	0
AT1G05120	0	0	0	0	0	0	0	1	0	0	0	0	0	0	0	0	0	0	NA	NA	NA	NA	NA	NA	NA	109.9	NA	NA	NA	NA	NA	NA	NA	NA	NA	NA	-	0	0	1
AT1G05135	0	0	0	0	0	0	0	0	1	0	0	0	0	0	0	0	0	0	NA	NA	NA	NA	NA	NA	NA	NA	116.9	NA	NA	NA	NA	NA	NA	NA	NA	NA	-	0	0	0
AT1G05136	0	0	0	0	0	0	0	0	0	0	1	0	0	0	0	0	0	1	NA	NA	NA	NA	NA	NA	NA	NA	NA	NA	154.8	NA	NA	NA	NA	NA	NA	143.3	-	0	0	0
AT1G05140	0	0	0	0	0	0	0	1	0	0	0	0	0	0	0	0	0	0	NA	NA	NA	NA	NA	NA	NA	843	NA	NA	NA	NA	NA	NA	NA	NA	NA	NA	YUP8H12.25|YUP8H12_25	0	0	0
AT1G05150	1	0	1	1	1	1	1	1	0	0	1	1	0	0	0	0	1	1	118.6	NA	112.4	115.8	198.7	195.6	86.6	209.6	NA	NA	149.1	122.1	NA	NA	NA	NA	208.3	238.9	YUP8H12.24|YUP8H12_24	0	0	0
AT1G05170	0	0	0	0	0	0	0	1	0	0	0	0	0	0	0	0	0	0	NA	NA	NA	NA	NA	NA	NA	128.6	NA	NA	NA	NA	NA	NA	NA	NA	NA	NA	YUP8H12.22|YUP8H12_22	0	0	0
AT1G05180	0	0	0	0	0	0	1	0	0	0	0	0	0	0	0	0	0	0	NA	NA	NA	NA	NA	NA	63	NA	NA	NA	NA	NA	NA	NA	NA	NA	NA	NA	AUXIN RESISTANT 1|AUXIN RESISTANT PROTEIN 1|YUP8H12.21|YUP8H12_21	1	0	0
AT1G05190	0	1	1	1	0	0	0	1	0	0	0	0	0	0	0	0	0	1	NA	103	194.7	202.7	NA	NA	NA	110.6	NA	NA	NA	NA	NA	NA	NA	NA	NA	112.4	YUP8H12.20|YUP8H12_20|embryo defective 2394	0	0	0
AT1G05230	0	1	0	0	0	1	1	0	0	0	1	0	0	0	0	0	0	1	NA	136.2	NA	NA	NA	92.8	49.2	NA	NA	NA	106.8	NA	NA	NA	NA	NA	NA	101.8	YUP8H12.16|YUP8H12_16|homeodomain GLABROUS 2	0	0	0
AT1G05240	0	0	0	1	0	0	1	0	0	0	0	0	0	0	0	0	0	0	NA	NA	NA	85.3	NA	NA	47.2	NA	NA	NA	NA	NA	NA	NA	NA	NA	NA	NA	YUP8H12.15	0	0	0
AT1G05250	0	0	1	0	0	0	0	1	0	0	0	0	0	0	0	0	0	0	NA	NA	79.4	NA	NA	NA	NA	69.9	NA	NA	NA	NA	NA	NA	NA	NA	NA	NA	AtPRX1|PRX2|YUP8H12.14|YUP8H12_14|peroxidase 2	0	0	0
AT1G05290	0	0	0	0	0	0	0	1	0	0	0	0	0	0	0	0	0	0	NA	NA	NA	NA	NA	NA	NA	969.6	NA	NA	NA	NA	NA	NA	NA	NA	NA	NA	YUP8H12.10|YUP8H12_10	0	0	0
AT1G05300	0	1	1	1	1	1	0	1	0	0	1	0	1	0	0	0	1	1	NA	151.7	380	342.2	121.9	141.7	NA	301.2	NA	NA	154.1	NA	58.1	NA	NA	NA	146.4	216.6	YUP8H12.8|YUP8H12_8|zinc transporter 5 precursor	0	0	1
AT1G05310	0	0	0	0	0	0	0	1	0	0	0	0	0	0	0	0	0	0	NA	NA	NA	NA	NA	NA	NA	112.9	NA	NA	NA	NA	NA	NA	NA	NA	NA	NA	YUP8H12.7|YUP8H12_7	0	0	0
AT1G05320	0	0	0	1	0	0	0	0	0	0	0	0	0	0	0	0	0	0	NA	NA	NA	84	NA	NA	NA	NA	NA	NA	NA	NA	NA	NA	NA	NA	NA	NA	YUP8H12.6|YUP8H12_6	0	0	0
AT1G05340	0	0	1	1	1	0	1	1	0	0	0	0	0	0	0	0	0	1	NA	NA	286.3	218.6	112.9	NA	66.9	115.9	NA	NA	NA	NA	NA	NA	NA	NA	NA	134.7	YUP8H12.4|YUP8H12_4	0	0	0
AT1G05350	0	1	0	0	0	0	0	0	0	0	0	0	0	0	0	0	0	0	NA	127.4	NA	NA	NA	NA	NA	NA	NA	NA	NA	NA	NA	NA	NA	NA	NA	NA	YUP8H12.3|YUP8H12_3	0	0	0
AT1G05370	0	1	1	1	1	1	1	1	1	0	1	1	0	0	0	0	1	1	NA	137.6	196.5	198.7	104.3	104.3	98.4	172.1	98.4	NA	209.9	208.4	NA	NA	NA	NA	160	187.5	YUP8H12.1	0	0	0
AT1G05380	0	1	1	1	0	0	0	0	0	0	0	0	0	0	0	0	0	0	NA	114.7	87.9	85.8	NA	NA	NA	NA	NA	NA	NA	NA	NA	NA	NA	NA	NA	NA	T25N20.3|T25N20_3	0	0	0
AT1G05390	0	0	0	0	0	0	1	0	0	0	0	0	0	0	0	0	0	0	NA	NA	NA	NA	NA	NA	76.7	NA	NA	NA	NA	NA	NA	NA	NA	NA	NA	NA	51807.TRNA-ASN-1	0	0	0
AT1G05410	1	1	1	1	0	0	0	1	1	1	1	1	0	0	0	0	1	1	131.8	218.1	156.4	154.1	NA	NA	NA	779	229.3	215.3	333.8	275.5	NA	NA	NA	NA	178.8	401	T25N20.6|T25N20_6	0	0	0
AT1G05450	0	0	0	0	0	0	0	1	0	0	0	0	0	0	0	0	0	0	NA	NA	NA	NA	NA	NA	NA	94.4	NA	NA	NA	NA	NA	NA	NA	NA	NA	NA	T25N20.10|T25N20_10	0	0	0
AT1G05460	0	0	1	1	0	0	0	0	0	0	0	0	0	0	0	0	1	1	NA	NA	72.9	74.9	NA	NA	NA	NA	NA	NA	NA	NA	NA	NA	NA	NA	139.7	111.7	SILENCING DEFECTIVE|T25N20.11|T25N20_11	0	0	0
AT1G05470	0	0	0	0	0	0	0	1	0	0	0	1	0	0	0	0	0	0	NA	NA	NA	NA	NA	NA	NA	214.3	NA	NA	NA	122.1	NA	NA	NA	NA	NA	NA	COTYLEDON VASCULAR PATTERN 2|T25N20.12|T25N20_12	0	0	0
AT1G05490	0	1	1	0	0	0	1	1	0	0	0	0	0	0	0	0	0	1	NA	62.8	68.1	NA	NA	NA	51.2	101.7	NA	NA	NA	NA	NA	NA	NA	NA	NA	58.3	T25N20.14|chromatin remodeling 31	0	0	1
AT1G05510	0	0	0	0	0	0	0	1	0	0	0	0	0	0	0	0	0	0	NA	NA	NA	NA	NA	NA	NA	250.8	NA	NA	NA	NA	NA	NA	NA	NA	NA	NA	OBAP1a|Oil Body-Associated Protein 1a|T25N20.16	0	0	0
AT1G05520	0	0	1	0	0	0	0	1	0	0	0	0	0	0	0	0	0	0	NA	NA	66.6	NA	NA	NA	NA	88.9	NA	NA	NA	NA	NA	NA	NA	NA	NA	NA	T25N20.17	0	0	0
AT1G05540	0	0	0	0	0	0	0	0	0	0	0	0	0	0	0	0	1	0	NA	NA	NA	NA	NA	NA	NA	NA	NA	NA	NA	NA	NA	NA	NA	NA	202	NA	T25N20.19	0	0	0
AT1G05550	0	0	0	0	0	0	0	0	0	0	0	0	0	0	0	0	1	0	NA	NA	NA	NA	NA	NA	NA	NA	NA	NA	NA	NA	NA	NA	NA	NA	201.5	NA	T25N20.20	0	0	0
AT1G05560	0	0	1	1	0	0	1	0	0	0	1	0	0	0	0	0	0	1	NA	NA	159.2	137.1	NA	NA	59	NA	NA	NA	154.4	NA	NA	NA	NA	NA	NA	194.7	T25N20.21|UDP-GLUCOSE TRANSFERASE 1|UDP-GLUCOSYLTRANSFERASE|UDP-glucosyltransferase 75B1|UGT1	0	0	0
AT1G05562	0	0	0	0	0	0	0	1	0	0	0	0	0	0	0	0	0	0	NA	NA	NA	NA	NA	NA	NA	144.1	NA	NA	NA	NA	NA	NA	NA	NA	NA	NA	-	0	0	0
AT1G05570	0	0	0	0	0	0	0	1	0	0	0	0	0	0	0	0	1	0	NA	NA	NA	NA	NA	NA	NA	144.1	NA	NA	NA	NA	NA	NA	NA	NA	181.7	NA	ATGSL06|ATGSL6|F3F20.1|F3F20_1|GLUCAN SYNTHASE-LIKE 6|GSL06|GSL6|callose synthase 1	0	0	1
AT1G05575	0	0	1	1	1	0	0	0	0	0	0	0	0	0	0	0	0	1	NA	NA	427	380.8	154.7	NA	NA	NA	NA	NA	NA	NA	NA	NA	NA	NA	NA	171.7	-	0	0	0
AT1G05577	0	0	0	0	0	0	0	1	0	0	0	0	0	0	0	0	0	0	NA	NA	NA	NA	NA	NA	NA	480.5	NA	NA	NA	NA	NA	NA	NA	NA	NA	NA	-	0	0	0
AT1G05630	0	1	1	1	1	1	0	1	0	0	1	1	0	0	0	0	0	1	NA	115.8	280.4	215.1	146.5	164.4	NA	128.1	NA	NA	170.3	140.2	NA	NA	NA	NA	NA	330.1	AT5PTASE13|Arabidopsis thaliana inositol-polyphosphate 5-phosphatase 13|F3F20.8|F3F20_8|inositol-polyphosphate 5-phosphatase 13	1	0	0
AT1G05640	0	0	1	1	0	0	0	0	0	0	0	1	0	0	0	0	0	1	NA	NA	129.8	128.4	NA	NA	NA	NA	NA	NA	NA	93.1	NA	NA	NA	NA	NA	105.9	F3F20.9|F3F20_9	0	0	0
AT1G05650	0	0	1	1	0	0	0	0	0	0	0	0	0	0	0	0	0	0	NA	NA	118.8	114.6	NA	NA	NA	NA	NA	NA	NA	NA	NA	NA	NA	NA	NA	NA	F3F20.10|F3F20_10	0	0	0
AT1G05675	0	0	0	0	0	0	0	1	0	0	0	0	1	0	0	0	0	0	NA	NA	NA	NA	NA	NA	NA	90.2	NA	NA	NA	NA	91.1	NA	NA	NA	NA	NA	-	0	0	0
AT1G05680	0	1	1	1	1	1	0	0	1	1	1	1	0	0	0	0	0	1	NA	127.4	274.4	245.9	124.6	155.3	NA	NA	145.4	201.4	246	214.6	NA	NA	NA	NA	NA	296.5	F3F20.13|F3F20_13|Uridine diphosphate glycosyltransferase 74E2	1	0	1
AT1G05700	0	0	0	0	0	0	0	1	0	0	0	0	0	0	0	0	0	0	NA	NA	NA	NA	NA	NA	NA	168.1	NA	NA	NA	NA	NA	NA	NA	NA	NA	NA	F3F20.15|F3F20_15	0	0	1
AT1G05710	1	1	1	1	1	1	1	1	0	0	1	1	0	0	0	0	1	1	104.7	273.1	442.1	432.9	175.1	219.4	143.6	114.6	NA	NA	301.3	283.7	NA	NA	NA	NA	158	376.3	F3F20.16|F3F20_16	0	0	1
AT1G05760	0	0	0	0	0	0	0	1	0	0	0	0	0	0	0	0	0	0	NA	NA	NA	NA	NA	NA	NA	124.1	NA	NA	NA	NA	NA	NA	NA	NA	NA	NA	T20M3.2|T20M3_2|restricted tev movement 1	0	0	0
AT1G05785	0	0	0	1	0	0	0	1	0	0	0	0	0	0	0	0	0	0	NA	NA	NA	85.5	NA	NA	NA	1523.1	NA	NA	NA	NA	NA	NA	NA	NA	NA	NA	-	0	0	0
AT1G05800	0	1	1	1	0	1	0	1	0	0	0	0	0	0	0	0	0	1	NA	111.5	130.8	113.7	NA	98.8	NA	115.6	NA	NA	NA	NA	NA	NA	NA	NA	NA	123.7	DONGLE|T20M3.6	0	0	0
AT1G05805	0	1	1	1	1	0	0	0	0	0	0	0	0	0	0	0	0	1	NA	215.3	184.4	194.8	115	NA	NA	NA	NA	NA	NA	NA	NA	NA	NA	NA	NA	143.6	ABA-responsive kinase substrate 2|AKS2	0	0	0
AT1G05810	0	0	0	0	0	1	1	1	0	0	0	0	0	0	0	0	0	1	NA	NA	NA	NA	NA	138.3	106.2	184.1	NA	NA	NA	NA	NA	NA	NA	NA	NA	168.3	ARA|ARA-1|ARABIDOPSIS THALIANA RAB GTPASE HOMOLOG A5E|ATRAB11D|ATRABA5E|RAB GTPase homolog A5E|T20M3.8|T20M3_8	0	0	0
AT1G05830	0	0	0	0	0	0	0	1	0	0	0	0	0	0	0	0	0	0	NA	NA	NA	NA	NA	NA	NA	300.5	NA	NA	NA	NA	NA	NA	NA	NA	NA	NA	SDG30|SET DOMAIN PROTEIN 30|T20M3.10|T20M3_10|trithorax-like protein 2	0	0	0
AT1G05835	0	1	0	0	1	1	1	0	0	0	0	0	0	0	0	0	0	0	NA	89.3	NA	NA	111.2	106.1	102.3	NA	NA	NA	NA	NA	NA	NA	NA	NA	NA	NA	-	0	0	0
AT1G05840	0	0	0	0	0	0	0	1	0	0	0	0	0	0	0	0	0	0	NA	NA	NA	NA	NA	NA	NA	173.8	NA	NA	NA	NA	NA	NA	NA	NA	NA	NA	T20M3.11|T20M3_11	0	0	0
AT1G05850	0	0	1	0	1	1	1	1	1	0	0	1	0	0	0	0	0	0	NA	NA	227.2	NA	182.6	158	273.5	248.8	126.9	NA	NA	428.6	NA	NA	NA	NA	NA	NA	ATCTL1|CHITINASE-LIKE PROTEIN 1|CTL1|ECTOPIC DEPOSITION OF LIGNIN IN PITH|ECTOPIC DEPOSITION OF LIGNIN IN PITH 1|ECTOPIC ROOT HAIR 2|ELP|ELP1|ERH2|HOT2|POM-POM1|SENSITIVE TO HOT TEMPERATURES 2|T20M3.12|T20M3_12	0	0	0
AT1G05860	0	1	0	1	0	0	0	0	0	0	1	0	1	0	0	0	0	1	NA	151.7	NA	235.4	NA	NA	NA	NA	NA	NA	393.7	NA	69.1	NA	NA	NA	NA	207.7	T20M3.13|T20M3_13	0	0	0
AT1G05870	1	1	1	1	1	1	1	1	0	0	1	1	0	0	0	0	1	1	118.6	146.5	236.6	237.5	165.6	181.8	151.5	681.9	NA	NA	267.2	215.6	NA	NA	NA	NA	154.6	236.5	T20M3.14|T20M3_14	0	0	0
AT1G05890	0	0	0	1	0	0	0	0	0	0	0	0	0	0	0	0	0	0	NA	NA	NA	80.9	NA	NA	NA	NA	NA	NA	NA	NA	NA	NA	NA	NA	NA	NA	ARABIDOPSIS ARIADNE 5|ARIADNE 5|ATARI5|T20M3.16|T20M3_16	0	0	0
AT1G05910	0	0	0	0	0	0	0	1	0	0	0	0	0	0	0	0	0	0	NA	NA	NA	NA	NA	NA	NA	101.4	NA	NA	NA	NA	NA	NA	NA	NA	NA	NA	T20M3.19|T20M3_19	0	0	1
AT1G05950	0	1	1	1	1	1	1	1	0	0	1	1	0	0	0	0	0	1	NA	94.6	267.3	248.4	150.6	130.4	72.8	229.3	NA	NA	177.8	202.4	NA	NA	NA	NA	NA	178.6	T21E18.2|T21E18_2	0	0	0
AT1G05960	1	1	1	1	1	1	1	0	0	0	1	1	0	0	0	0	0	1	114	148.9	370.6	348.4	243.8	217.1	72.8	NA	NA	NA	288	227.2	NA	NA	NA	NA	NA	237.5	T21E18.21|T21E18_21	0	0	1
AT1G05970	0	0	0	0	0	0	0	1	0	0	0	0	0	0	0	0	0	0	NA	NA	NA	NA	NA	NA	NA	109.9	NA	NA	NA	NA	NA	NA	NA	NA	NA	NA	T21E18.3|T21E18_3	0	0	0
AT1G05990	0	0	0	0	0	0	0	1	0	0	0	0	0	0	0	0	0	0	NA	NA	NA	NA	NA	NA	NA	140.1	NA	NA	NA	NA	NA	NA	NA	NA	NA	NA	RHS1|ROOT HAIR SPECIFIC 1|ROOT HAIR SPECIFIC 2|T21E18.4|T21E18_4	0	0	0
AT1G06000	0	0	1	1	0	0	0	0	0	0	0	0	0	0	0	0	0	0	NA	NA	151.7	166.3	NA	NA	NA	NA	NA	NA	NA	NA	NA	NA	NA	NA	NA	NA	T21E18.5|T21E18_5	0	0	0
AT1G06002	0	0	0	0	0	0	0	0	0	0	0	0	1	0	0	0	0	0	NA	NA	NA	NA	NA	NA	NA	NA	NA	NA	NA	NA	57.3	NA	NA	NA	NA	NA	-	0	0	0
AT1G06040	0	1	1	1	0	1	1	1	0	0	1	1	0	0	1	0	0	1	NA	200.4	184.4	160.1	NA	136.7	96.4	129.6	NA	NA	201.8	161.9	NA	NA	110.8	NA	NA	165.5	B-box domain protein 24|BBX24|SALT TOLERANCE|T21E18.9|T21E18_9	0	0	1
AT1G06070	0	1	1	1	1	1	1	1	0	0	1	1	0	0	0	0	0	1	NA	164.8	220.3	224.6	170.1	163.6	208.5	109.1	NA	NA	156.2	166.2	NA	NA	NA	NA	NA	138.5	T21E18.12|T21E18_12|bZIP69|basic leucine-zipper 69	0	0	0
AT1G06080	0	0	0	0	0	0	0	0	0	0	0	0	0	0	0	0	1	0	NA	NA	NA	NA	NA	NA	NA	NA	NA	NA	NA	NA	NA	NA	NA	NA	156.6	NA	AtADS1|DELTA 9 DESATURASE|T21E18.13|T21E18_13|delta 9 desaturase 1	0	0	1
AT1G06110	0	0	0	0	0	0	0	1	0	0	1	1	0	0	0	0	0	0	NA	NA	NA	NA	NA	NA	NA	137.9	NA	NA	115.8	117.3	NA	NA	NA	NA	NA	NA	SKP1/ASK-interacting protein 16|T21E18.16|T21E18_16	0	0	0
AT1G06120	0	0	1	1	0	0	0	0	0	0	0	0	0	0	0	0	0	0	NA	NA	122.8	133.8	NA	NA	NA	NA	NA	NA	NA	NA	NA	NA	NA	NA	NA	NA	T21E18.17|T21E18_17	0	0	0
AT1G06130	0	0	0	1	0	0	0	0	0	0	0	0	0	0	0	0	0	0	NA	NA	NA	121.6	NA	NA	NA	NA	NA	NA	NA	NA	NA	NA	NA	NA	NA	NA	T21E18.18|T21E18_18|glyoxalase 2-4	0	0	0
AT1G06135	0	0	1	1	0	0	0	0	0	0	0	0	0	0	0	0	0	1	NA	NA	133.5	136	NA	NA	NA	NA	NA	NA	NA	NA	NA	NA	NA	NA	NA	117.9	-	0	0	0
AT1G06137	0	0	0	0	0	0	0	1	0	0	0	0	0	0	0	0	0	0	NA	NA	NA	NA	NA	NA	NA	196.8	NA	NA	NA	NA	NA	NA	NA	NA	NA	NA	-	0	0	0
AT1G06140	0	0	1	1	0	0	0	0	0	0	0	0	0	0	0	0	0	1	NA	NA	153.6	126.2	NA	NA	NA	NA	NA	NA	NA	NA	NA	NA	NA	NA	NA	108.3	T21E18.19|T21E18_19|mitochondrial editing factor 3	0	0	0
AT1G06148	0	0	1	1	0	0	0	1	0	0	0	0	0	0	0	0	1	1	NA	NA	339.1	324.9	NA	NA	NA	251.3	NA	NA	NA	NA	NA	NA	NA	NA	161.4	323.9	-	0	0	0
AT1G06149	0	0	0	0	0	0	0	1	0	0	0	0	0	0	0	0	0	0	NA	NA	NA	NA	NA	NA	NA	236.3	NA	NA	NA	NA	NA	NA	NA	NA	NA	NA	NoInfo	0	0	0
AT1G06150	0	0	0	0	0	0	1	1	0	0	0	0	0	0	0	0	1	0	NA	NA	NA	NA	NA	NA	51.2	346.4	NA	NA	NA	NA	NA	NA	NA	NA	175.4	NA	AtRLP53|EMBRYO DEFECTIVE 1444|LHL1|LONESOME HIGHWAY LIKE 1|T21E18.20|T21E18_20|receptor like protein 53	0	0	0
AT1G06160	0	0	1	1	1	1	1	1	0	0	1	0	0	0	0	0	1	0	NA	NA	394.3	332.7	199.9	130.6	129.8	241	NA	NA	236.4	NA	NA	NA	NA	NA	170.6	NA	F9P14.2|F9P14_2|octadecanoid-responsive Arabidopsis AP2/ERF 59	0	0	0
AT1G06170	0	1	0	0	0	0	0	0	0	0	0	0	0	0	0	0	0	0	NA	138	NA	NA	NA	NA	NA	NA	NA	NA	NA	NA	NA	NA	NA	NA	NA	NA	F9P14.3|F9P14_3	0	0	0
AT1G06180	0	0	1	1	0	0	1	1	0	0	0	0	0	0	0	0	0	0	NA	NA	143.6	136.4	NA	NA	90.5	179.3	NA	NA	NA	NA	NA	NA	NA	NA	NA	NA	ATMYB13|ATMYBLFGN|F9P14.4|F9P14_4|myb domain protein 13	0	0	1
AT1G06190	0	0	0	0	0	0	1	1	0	0	0	0	1	0	0	0	0	0	NA	NA	NA	NA	NA	NA	92.5	405.9	NA	NA	NA	NA	71.4	NA	NA	NA	NA	NA	F9P14.5|F9P14_5|Rho-N 1	0	0	0
AT1G06200	0	1	0	0	0	0	0	0	0	0	0	0	0	0	0	0	0	0	NA	138.3	NA	NA	NA	NA	NA	NA	NA	NA	NA	NA	NA	NA	NA	NA	NA	NA	F9P14.6|F9P14_6	0	0	0
AT1G06210	0	0	1	0	0	0	0	0	0	0	0	0	0	0	0	0	0	0	NA	NA	77.9	NA	NA	NA	NA	NA	NA	NA	NA	NA	NA	NA	NA	NA	NA	NA	F9P14.7|F9P14_7	0	0	0
AT1G06225	0	0	1	1	0	0	0	0	0	0	0	0	0	0	0	0	0	0	NA	NA	82.6	76.7	NA	NA	NA	NA	NA	NA	NA	NA	NA	NA	NA	NA	NA	NA	CLAVATA3/ESR-RELATED 3	0	0	0
AT1G06250	0	0	0	0	0	0	0	1	0	0	0	0	0	0	0	0	0	0	NA	NA	NA	NA	NA	NA	NA	156.4	NA	NA	NA	NA	NA	NA	NA	NA	NA	NA	F9P14.11|F9P14_11	0	0	0
AT1G06290	0	0	1	1	0	0	0	0	0	0	0	0	0	0	0	0	0	0	NA	NA	78.1	69.3	NA	NA	NA	NA	NA	NA	NA	NA	NA	NA	NA	NA	NA	NA	ATACX3|acyl-CoA oxidase 3	0	0	0
AT1G06310	0	0	0	0	0	0	0	1	0	0	0	0	0	0	0	0	0	0	NA	NA	NA	NA	NA	NA	NA	136.9	NA	NA	NA	NA	NA	NA	NA	NA	NA	NA	T2D23.2|T2D23_2|acyl-CoA oxidase 6	0	0	0
AT1G06320	0	0	0	0	0	0	0	0	0	0	0	0	1	0	0	0	0	0	NA	NA	NA	NA	NA	NA	NA	NA	NA	NA	NA	NA	56.2	NA	NA	NA	NA	NA	T2D23.15|T2D23_15	0	0	0
AT1G06330	0	0	0	0	0	0	0	0	0	0	0	0	0	0	0	0	1	0	NA	NA	NA	NA	NA	NA	NA	NA	NA	NA	NA	NA	NA	NA	NA	NA	160	NA	T2D23.3|T2D23_3	0	0	0
AT1G06340	0	0	0	0	0	0	1	0	0	0	0	0	0	0	0	0	0	0	NA	NA	NA	NA	NA	NA	63	NA	NA	NA	NA	NA	NA	NA	NA	NA	NA	NA	T2D23.4|T2D23_4	0	0	0
AT1G06360	0	0	0	0	0	0	1	0	0	0	0	0	0	0	0	0	0	0	NA	NA	NA	NA	NA	NA	74.8	NA	NA	NA	NA	NA	NA	NA	NA	NA	NA	NA	T2D23.6|T2D23_6	0	0	0
AT1G06370	0	0	0	0	0	0	0	0	0	0	0	0	0	0	0	0	1	1	NA	NA	NA	NA	NA	NA	NA	NA	NA	NA	NA	NA	NA	NA	NA	NA	187.5	150.5	T2D23.14	0	0	0
AT1G06390	0	0	1	1	0	0	1	0	0	0	0	0	1	0	0	0	0	0	NA	NA	85.6	87.9	NA	NA	127.9	NA	NA	NA	NA	NA	57.3	NA	NA	NA	NA	NA	A. THALIANA SHAGGY-LIKE KINASE GROUP 2 3|ATGSK1|ATSK2-3|ATSK22|BIL2|BIN2-LIKE 2|GSK3/SHAGGY-LIKE PROTEIN KINASE|GSK3/SHAGGY-like protein kinase 1|SHAGGY-LIKE PROTEIN KINASE 22|SK22|T2D23.9|T2D23_9	0	0	0
AT1G06400	0	0	0	0	0	1	0	1	0	0	0	0	0	0	0	0	1	0	NA	NA	NA	NA	NA	135.8	NA	296.7	NA	NA	NA	NA	NA	NA	NA	NA	463.9	NA	ARA2|ARABIDOPSIS THALIANA RAB GTPASE HOMOLOG A1A|ATRAB11E|ATRABA1A|SMALL GTP-BINDING PROTEIN|T2D23.10|T2D23_10	1	0	0
AT1G06410	0	1	1	1	1	0	1	0	1	0	1	1	0	0	0	0	0	1	NA	290.8	371.1	352.2	120	NA	224.3	NA	122.9	NA	431.8	376.5	NA	NA	NA	NA	NA	378	ATTPS7|ATTPSA|T2D23.11|T2D23_11|TREHALOSE -6-PHOSPHATASE SYNTHASE S7|trehalose-phosphatase/synthase 7	0	0	0
AT1G06420	0	0	0	0	0	0	1	1	0	0	0	0	0	0	0	0	0	0	NA	NA	NA	NA	NA	NA	86.6	111.9	NA	NA	NA	NA	NA	NA	NA	NA	NA	NA	T2D23.12|T2D23_12	0	0	0
AT1G06460	0	0	0	0	0	0	0	1	0	0	0	0	0	0	0	0	0	0	NA	NA	NA	NA	NA	NA	NA	191.8	NA	NA	NA	NA	NA	NA	NA	NA	NA	NA	ACD31.2|ALPHA-CRYSTALLIN DOMAIN 31.2|F12K11.19|F12K11_19|alpha-crystallin domain 32.1	0	0	1
AT1G06475	0	1	1	1	1	1	0	0	0	0	1	1	0	0	0	0	0	1	NA	165.2	322.4	282.2	133	97.6	NA	NA	NA	NA	186	181.4	NA	NA	NA	NA	NA	362.3	-	0	0	0
AT1G06480	0	0	1	1	0	0	1	0	0	0	0	0	0	0	0	0	0	0	NA	NA	126.1	135.6	NA	NA	68.9	NA	NA	NA	NA	NA	NA	NA	NA	NA	NA	NA	51438.TRNA-ILE-1	0	0	0
AT1G06490	0	0	0	0	0	0	0	1	0	0	0	0	0	0	0	0	0	0	NA	NA	NA	NA	NA	NA	NA	187.6	NA	NA	NA	NA	NA	NA	NA	NA	NA	NA	ATGSL07|Arabidopsis thaliana glucan synthase-like 7|F12K11.17|F12K11_17|GSL07|GSL7|atgsl7|callose synthase 7|glucan synthase-like 7|gsl07	0	0	0
AT1G06500	0	0	0	0	0	0	0	1	0	0	0	0	0	0	0	0	0	0	NA	NA	NA	NA	NA	NA	NA	268.5	NA	NA	NA	NA	NA	NA	NA	NA	NA	NA	F12K11.25|F12K11_25	0	0	0
AT1G06520	0	0	0	0	0	0	0	1	0	0	0	0	1	0	0	0	0	1	NA	NA	NA	NA	NA	NA	NA	117.6	NA	NA	NA	NA	54.7	NA	NA	NA	NA	177.9	ATGPAT1|F12K11.15|F12K11_15|GLYCEROL-3-PHOSPHATE sn-2-ACYLTRANSFERASE 1|glycerol-3-phosphate acyltransferase 1|sn-2-GPAT1	0	0	0
AT1G06530	0	0	1	1	0	0	1	0	0	0	0	0	0	0	0	0	0	0	NA	NA	252	199.6	NA	NA	74.8	NA	NA	NA	NA	NA	NA	NA	NA	NA	NA	NA	F12K11.14|F12K11_14|peroxisomal and mitochondrial division factor 2	0	0	0
AT1G06550	0	0	0	1	0	0	0	1	0	0	0	0	0	0	0	0	0	0	NA	NA	NA	58.7	NA	NA	NA	402.4	NA	NA	NA	NA	NA	NA	NA	NA	NA	NA	F12K11.12|F12K11_12	0	0	0
AT1G06560	0	1	0	0	0	0	1	1	0	0	0	0	0	0	0	0	0	0	NA	190.9	NA	NA	NA	NA	76.7	442.1	NA	NA	NA	NA	NA	NA	NA	NA	NA	NA	F12K11.10|F12K11_10	0	0	0
AT1G06570	0	1	1	1	1	1	1	0	0	0	1	1	0	0	0	0	0	1	NA	157	301.4	272.6	201.5	161.5	120	NA	NA	NA	172.3	149.8	NA	NA	NA	NA	NA	210.8	4-HYDROXYPHENYLPYRUVATE DIOXYGENASE|4-hydroxyphenylpyruvate dioxygenase|F12K11.9|F12K11_9|HPD|HPPD|P-HYDROXYPHENYLPYRUVATE DIOXYGENASE|phytoene desaturation 1	0	0	0
AT1G06580	0	0	0	0	0	0	0	1	0	0	0	0	0	0	0	0	0	0	NA	NA	NA	NA	NA	NA	NA	146.4	NA	NA	NA	NA	NA	NA	NA	NA	NA	NA	F12K11.8|F12K11_8|PPR1|pentatricopeptide repeat 1	0	0	0
AT1G06590	0	0	0	0	0	0	0	1	0	0	0	0	0	0	0	0	0	0	NA	NA	NA	NA	NA	NA	NA	103.4	NA	NA	NA	NA	NA	NA	NA	NA	NA	NA	F12K11.7|F12K11_7	0	0	0
AT1G06610	0	1	1	1	1	0	1	0	0	0	1	0	0	0	0	0	0	1	NA	124.6	193	219.6	97.5	NA	72.8	NA	NA	NA	130.8	NA	NA	NA	NA	NA	NA	127.8	51438.TRNA-ALA-1	0	0	0
AT1G06630	0	0	0	0	0	0	0	1	0	0	0	0	0	0	0	0	0	0	NA	NA	NA	NA	NA	NA	NA	85.7	NA	NA	NA	NA	NA	NA	NA	NA	NA	NA	F12K11.23|F12K11_23	0	0	0
AT1G06640	0	0	1	1	0	0	0	0	0	0	0	0	0	0	0	0	0	0	NA	NA	136.5	146.6	NA	NA	NA	NA	NA	NA	NA	NA	NA	NA	NA	NA	NA	NA	F12K11.27|F12K11_27	0	0	0
AT1G06645	0	0	0	0	0	1	0	1	0	0	1	1	0	0	0	0	1	1	NA	NA	NA	NA	NA	98	NA	120.6	NA	NA	217.6	210.8	NA	NA	NA	NA	241.1	147.4	F12K11.6	0	0	0
AT1G06680	0	1	0	0	0	0	0	0	0	0	1	1	0	0	0	0	0	0	NA	84	NA	NA	NA	NA	NA	NA	NA	NA	120.3	113.4	NA	NA	NA	NA	NA	NA	F12K11.3|F12K11_3|OE23|OEE2|OXYGEN EVOLVING COMPLEX SUBUNIT 23 KDA|OXYGEN-EVOLVING ENHANCER PROTEIN 2|PHOTOSYSTEM II SUBUNIT P|PSII-P|photosystem II subunit P-1	0	0	0
AT1G06690	0	0	0	0	0	0	0	1	0	0	0	0	0	0	0	0	0	0	NA	NA	NA	NA	NA	NA	NA	110.1	NA	NA	NA	NA	NA	NA	NA	NA	NA	NA	F12K11.2|F12K11_2	0	0	0
AT1G06700	0	1	1	0	0	0	1	0	0	0	0	0	1	0	0	0	0	0	NA	88.2	74.3	NA	NA	NA	70.8	NA	NA	NA	NA	NA	53.5	NA	NA	NA	NA	NA	F4H5.21|F4H5_21	0	0	0
AT1G06710	0	0	0	0	0	0	0	1	0	0	0	0	0	0	0	0	0	0	NA	NA	NA	NA	NA	NA	NA	245.3	NA	NA	NA	NA	NA	NA	NA	NA	NA	NA	F4H5.20|F4H5_20|MTSF1|mitochondrial stability factor 1	0	0	0
AT1G06740	0	0	1	1	0	0	0	1	0	0	1	1	0	0	0	0	0	1	NA	NA	121.3	78	NA	NA	NA	180.6	NA	NA	91	77.9	NA	NA	NA	NA	NA	61	F4H5.17|F4H5_17|MUSTANG 3	0	0	0
AT1G06760	0	0	0	0	0	0	1	0	0	0	0	0	0	0	0	0	0	0	NA	NA	NA	NA	NA	NA	66.9	NA	NA	NA	NA	NA	NA	NA	NA	NA	NA	NA	F4H5.15|F4H5_15	0	0	0
AT1G06780	0	0	1	1	0	0	1	1	0	0	1	1	0	0	0	0	0	0	NA	NA	91.8	89.8	NA	NA	88.5	96.7	NA	NA	106.3	96.9	NA	NA	NA	NA	NA	NA	F4H5.13|F4H5_13|galacturonosyltransferase 6	0	0	0
AT1G06800	0	0	1	1	0	0	1	0	0	0	0	0	0	0	0	0	1	1	NA	NA	112.9	106.7	NA	NA	63	NA	NA	NA	NA	NA	NA	NA	NA	NA	201.5	116.2	DAD1-Like Lipase 4|DALL4|F4H5.11|F4H5_11|phospholipase A I gamma 1	0	0	0
AT1G06840	0	1	1	1	1	1	0	1	0	0	1	0	0	0	0	0	0	1	NA	176.4	357.5	347.1	173.1	185.3	NA	125.6	NA	NA	174.2	NA	NA	NA	NA	NA	NA	216.3	F4H5.8|F4H5_8	0	0	0
AT1G06850	0	0	0	0	0	0	1	0	0	0	1	1	0	0	0	0	0	0	NA	NA	NA	NA	NA	NA	135.7	NA	NA	NA	226.9	219.6	NA	NA	NA	NA	NA	NA	AtbZIP52|F4H5.7|F4H5_7|basic leucine-zipper 52	0	0	0
AT1G06880	0	0	0	0	0	0	0	1	0	0	0	0	0	0	0	0	0	0	NA	NA	NA	NA	NA	NA	NA	125.9	NA	NA	NA	NA	NA	NA	NA	NA	NA	NA	52131.TRNA-GLY-1	0	0	0
AT1G06920	0	0	0	0	1	1	0	1	0	0	0	0	0	0	0	0	1	0	NA	NA	NA	NA	176	151.5	NA	117.6	NA	NA	NA	NA	NA	NA	NA	NA	483.3	NA	ARABIDOPSIS THALIANA OVATE FAMILY PROTEIN 4|ATOFP4|F4H5.2|F4H5_2|ovate family protein 4	0	0	0
AT1G06923	0	0	1	1	0	1	0	0	0	0	0	0	0	0	0	0	0	1	NA	NA	119	113.6	NA	103.9	NA	NA	NA	NA	NA	NA	NA	NA	NA	NA	NA	88.1	-	0	0	0
AT1G06930	0	0	0	0	0	0	1	0	0	0	0	0	0	0	0	0	0	0	NA	NA	NA	NA	NA	NA	76.7	NA	NA	NA	NA	NA	NA	NA	NA	NA	NA	NA	F4H5.24|F4H5_24	0	0	0
AT1G06950	0	0	0	0	0	0	0	1	0	0	0	0	0	0	0	0	0	0	NA	NA	NA	NA	NA	NA	NA	108.4	NA	NA	NA	NA	NA	NA	NA	NA	NA	NA	ARABIDOPSIS THALIANA TRANSLOCON AT THE INNER ENVELOPE MEMBRANE OF CHLOROPLASTS 110|ATTIC110|translocon at the inner envelope membrane of chloroplasts 110	0	0	0
AT1G06980	0	0	0	0	0	0	1	0	1	0	0	0	0	0	0	0	0	1	NA	NA	NA	NA	NA	NA	82.6	NA	69.9	NA	NA	NA	NA	NA	NA	NA	NA	109	F10K1.30|F10K1_30	0	0	1
AT1G06990	0	0	0	0	0	0	0	1	0	0	0	0	0	0	0	0	0	0	NA	NA	NA	NA	NA	NA	NA	155.9	NA	NA	NA	NA	NA	NA	NA	NA	NA	NA	F10K1.29|F10K1_29	0	0	0
AT1G07000	0	1	1	1	1	1	0	0	1	0	1	1	0	0	0	0	0	1	NA	207.2	347.4	324.9	113.9	122.7	NA	NA	145	NA	245.8	237.8	NA	NA	NA	NA	NA	268.7	ATEXO70B2|F10K1.28|F10K1_28|exocyst subunit exo70 family protein B2	0	0	0
AT1G07010	0	0	0	0	0	0	1	0	0	0	0	0	0	0	0	0	0	0	NA	NA	NA	NA	NA	NA	123.9	NA	NA	NA	NA	NA	NA	NA	NA	NA	NA	NA	AtSLP1|F10K1.27|F10K1_27|Shewenella-like protein phosphatase 1	0	0	0
AT1G07030	0	0	1	1	1	1	0	0	0	0	0	0	0	0	0	0	0	1	NA	NA	297.3	304.3	150.4	183.9	NA	NA	NA	NA	NA	NA	NA	NA	NA	NA	NA	214.6	F10K1.26|F10K1_26	0	0	0
AT1G07040	0	0	0	0	0	0	0	0	0	0	1	1	0	0	0	0	1	1	NA	NA	NA	NA	NA	NA	NA	NA	NA	NA	152.7	175.3	NA	NA	NA	NA	146.4	191.6	F10K1.25|F10K1_25	0	0	0
AT1G07051	0	0	0	0	0	0	0	1	0	0	0	0	0	0	0	0	0	0	NA	NA	NA	NA	NA	NA	NA	257	NA	NA	NA	NA	NA	NA	NA	NA	NA	NA	MIR847A|microRNA847A|p_MI0005410	0	0	0
AT1G07060	0	0	0	0	0	0	1	0	0	0	0	0	0	0	0	0	0	0	NA	NA	NA	NA	NA	NA	76.7	NA	NA	NA	NA	NA	NA	NA	NA	NA	NA	NA	ATDFO|DSB formation|F10K1.23|F10K1_23	0	0	0
AT1G07080	0	0	0	0	0	0	0	1	0	0	0	0	0	0	0	0	0	0	NA	NA	NA	NA	NA	NA	NA	156.9	NA	NA	NA	NA	NA	NA	NA	NA	NA	NA	F10K1.21|F10K1_21	0	0	0
AT1G07090	0	0	0	0	0	0	0	1	0	0	0	0	0	0	0	0	1	0	NA	NA	NA	NA	NA	NA	NA	108.9	NA	NA	NA	NA	NA	NA	NA	NA	327.6	NA	F10K1.20|F10K1_20|LIGHT SENSITIVE HYPOCOTYLS 6	0	0	1
AT1G07100	0	0	0	0	0	0	1	1	0	0	0	0	0	0	0	0	0	1	NA	NA	NA	NA	NA	NA	96.4	80.7	NA	NA	NA	NA	NA	NA	NA	NA	NA	172.4	61269.TRNA-ILE-1	0	0	0
AT1G07110	0	0	0	0	0	0	0	1	0	0	0	0	0	0	0	0	0	0	NA	NA	NA	NA	NA	NA	NA	93.4	NA	NA	NA	NA	NA	NA	NA	NA	NA	NA	''fructose-2|6-BISPHOSPHATASE|6-bisphosphatase|6-bisphosphatase''|ATF2KP|F10K1.19|F10K1_19|FKFBP|FRUCTOSE-2|FRUCTOSE-6-PHOSPHATE 2-KINASE|fructose-2	0	0	0
AT1G07120	0	0	0	0	0	0	0	1	0	0	0	0	0	0	0	0	0	0	NA	NA	NA	NA	NA	NA	NA	107.1	NA	NA	NA	NA	NA	NA	NA	NA	NA	NA	F10K1.18|F10K1_18	0	0	0
AT1G07128	0	0	1	0	0	0	0	0	0	0	0	0	0	0	0	0	0	0	NA	NA	143.5	NA	NA	NA	NA	NA	NA	NA	NA	NA	NA	NA	NA	NA	NA	NA	-	0	0	0
AT1G07135	0	0	0	0	0	0	0	0	0	0	0	0	0	0	0	0	1	0	NA	NA	NA	NA	NA	NA	NA	NA	NA	NA	NA	NA	NA	NA	NA	NA	173.5	NA	-	0	0	0
AT1G07140	0	0	0	0	0	0	0	1	0	0	0	0	0	0	0	0	0	0	NA	NA	NA	NA	NA	NA	NA	123.6	NA	NA	NA	NA	NA	NA	NA	NA	NA	NA	F10K1.15|F10K1_15|RAN-BINDING PROTEIN SIRANBP	0	0	0
AT1G07150	0	0	0	0	0	0	1	1	0	0	0	0	0	0	0	0	1	0	NA	NA	NA	NA	NA	NA	110.2	89.4	NA	NA	NA	NA	NA	NA	NA	NA	310.7	NA	F10K1.14|F10K1_14|mitogen-activated protein kinase kinase kinase 13	0	0	0
AT1G07170	0	0	0	0	0	0	0	1	0	0	0	0	0	0	0	0	0	0	NA	NA	NA	NA	NA	NA	NA	138.1	NA	NA	NA	NA	NA	NA	NA	NA	NA	NA	F10K1.35	0	0	0
AT1G07175	0	0	0	0	1	0	0	0	0	0	0	0	0	0	0	0	0	0	NA	NA	NA	NA	137.1	NA	NA	NA	NA	NA	NA	NA	NA	NA	NA	NA	NA	NA	-	0	0	0
AT1G07180	0	0	1	1	1	1	1	1	0	0	1	1	0	0	0	0	0	1	NA	NA	427.7	384.3	204.5	182.4	106.2	236.8	NA	NA	178.2	140.3	NA	NA	NA	NA	NA	274.5	ARABIDOPSIS THALIANA INTERNAL NON-PHOSPHORYLATING NAD ( P ) H DEHYDROGENASE|ATNDI1|F10K1.11|F10K1_11|NADH-DEHYDROGENASE|alternative NAD(P)H dehydrogenase 1|alternative NAD(P)H dehydrogenase 1	0	0	0
AT1G07200	0	0	1	1	0	0	0	0	0	0	0	0	0	0	0	0	0	1	NA	NA	154.9	158.7	NA	NA	NA	NA	NA	NA	NA	NA	NA	NA	NA	NA	NA	221.7	F10K1.9|F10K1_9|SMAX1-like 6|SMXL6	0	0	0
AT1G07210	0	0	1	1	0	0	1	0	0	0	1	1	0	0	0	0	1	1	NA	NA	174.4	135.3	NA	NA	143.6	NA	NA	NA	167.9	164.4	NA	NA	NA	NA	303.5	154.9	F10K1.8|F10K1_8	0	0	0
AT1G07220	0	0	0	0	0	0	0	1	0	0	0	0	0	0	0	0	1	0	NA	NA	NA	NA	NA	NA	NA	270.5	NA	NA	NA	NA	NA	NA	NA	NA	176.9	NA	F10K1.7|F10K1_7	0	0	0
AT1G07250	0	0	0	0	0	0	0	1	0	0	0	0	0	0	0	0	0	0	NA	NA	NA	NA	NA	NA	NA	140.1	NA	NA	NA	NA	NA	NA	NA	NA	NA	NA	F10K1.4|F10K1_4|UDP-glucosyl transferase 71C4	0	0	0
AT1G07270	0	0	1	1	1	1	1	1	0	0	0	0	0	0	0	0	0	1	NA	NA	241	240.2	105.2	129.8	51.2	159.1	NA	NA	NA	NA	NA	NA	NA	NA	NA	305.7	F10K1.2|F10K1_2	0	0	0
AT1G07280	0	0	0	0	0	0	0	0	0	0	0	0	1	0	0	0	0	0	NA	NA	NA	NA	NA	NA	NA	NA	NA	NA	NA	NA	50.5	NA	NA	NA	NA	NA	F22G5.38|F22G5_38	0	0	0
AT1G07290	0	0	0	0	1	0	0	1	0	0	0	0	0	0	0	0	0	0	NA	NA	NA	NA	107.8	NA	NA	210.6	NA	NA	NA	NA	NA	NA	NA	NA	NA	NA	F22G5.37|F22G5_37|golgi nucleotide sugar transporter 2	0	0	0
AT1G07310	0	1	0	0	0	0	0	0	0	0	0	0	0	0	0	0	0	0	NA	92.1	NA	NA	NA	NA	NA	NA	NA	NA	NA	NA	NA	NA	NA	NA	NA	NA	F22G5.35|F22G5_35	0	0	0
AT1G07350	0	0	0	0	0	0	0	1	0	0	0	0	0	0	0	0	0	0	NA	NA	NA	NA	NA	NA	NA	163.3	NA	NA	NA	NA	NA	NA	NA	NA	NA	NA	F22G5.31|F22G5_31|serine/arginine rich-like protein 45a	0	0	0
AT1G07360	0	0	1	0	0	0	0	0	0	0	0	0	0	0	0	0	0	0	NA	NA	67.3	NA	NA	NA	NA	NA	NA	NA	NA	NA	NA	NA	NA	NA	NA	NA	F22G5.30|F22G5_30|MOS4-associated complex subunit 5A	0	0	0
AT1G07370	0	0	0	0	0	0	0	1	0	0	0	0	0	0	0	0	0	0	NA	NA	NA	NA	NA	NA	NA	182.6	NA	NA	NA	NA	NA	NA	NA	NA	NA	NA	ATPCNA1|F22G5.29|F22G5_29|PROLIFERATING CELLULAR NUCLEAR ANTIGEN|PROLIFERATING CELLULAR NUCLEAR ANTIGEN 1|proliferating cellular nuclear antigen 1	0	0	0
AT1G07380	0	0	0	0	0	0	0	1	0	0	0	0	0	0	0	0	1	0	NA	NA	NA	NA	NA	NA	NA	129.9	NA	NA	NA	NA	NA	NA	NA	NA	451.8	NA	F22G5.28|F22G5_28	0	0	0
AT1G07390	0	0	1	1	0	0	0	0	0	0	0	0	0	0	0	0	0	1	NA	NA	124	121.4	NA	NA	NA	NA	NA	NA	NA	NA	NA	NA	NA	NA	NA	91.2	AtRLP1|F22G5.26|F22G5_26|receptor like protein 1	0	0	0
AT1G07410	0	0	0	0	0	0	0	1	0	0	0	0	0	0	0	0	0	0	NA	NA	NA	NA	NA	NA	NA	188.8	NA	NA	NA	NA	NA	NA	NA	NA	NA	NA	ARABIDOPSIS RAB GTPASE HOMOLOG A2B|ATRAB-A2B|ATRABA2B|F22G5.24|F22G5_24|RAB GTPASE HOMOLOG A2B|RAB GTPase homolog A2B|RAB-A2B	0	0	0
AT1G07420	0	1	1	1	0	0	0	0	0	0	0	0	0	0	0	0	0	1	NA	137.6	131.4	145.2	NA	NA	NA	NA	NA	NA	NA	NA	NA	NA	NA	NA	NA	145.7	ATSMO1|ATSMO2|Arabidopsis thaliana sterol 4-alpha-methyl oxidase 1|F22G5.23|F22G5_23|STEROL 4-ALPHA-METHYL-OXIDASE 2|sterol 4-alpha-methyl-oxidase 2-1	0	0	0
AT1G07430	0	1	1	1	0	0	1	1	0	0	1	0	0	0	0	0	1	1	NA	166.6	203.2	185.8	NA	NA	90.5	130.4	NA	NA	192.8	NA	NA	NA	NA	NA	429.1	225.2	AIP1|AKT1 interacting protein phosphatase 1|AtAIP1|F22G5.22|F22G5_22|HON|HONSU (Korean for abnormal drowsiness)|highly ABA-induced PP2C gene 2	0	0	0
AT1G07440	0	0	1	0	0	0	0	1	0	0	0	0	0	0	0	0	0	0	NA	NA	130.7	NA	NA	NA	NA	84.4	NA	NA	NA	NA	NA	NA	NA	NA	NA	NA	F22G5.39|F22G5_39	0	0	0
AT1G07450	0	0	0	0	0	0	0	1	0	0	0	0	0	0	0	0	0	0	NA	NA	NA	NA	NA	NA	NA	68.4	NA	NA	NA	NA	NA	NA	NA	NA	NA	NA	F22G5.20|F22G5_20	0	0	0
AT1G07470	0	0	0	0	0	1	0	0	0	0	0	0	0	0	0	0	0	0	NA	NA	NA	NA	NA	71.9	NA	NA	NA	NA	NA	NA	NA	NA	NA	NA	NA	NA	F22G5.18|F22G5_18	0	0	0
AT1G07480	0	0	0	0	0	0	1	0	0	0	0	0	0	0	0	0	0	0	NA	NA	NA	NA	NA	NA	61	NA	NA	NA	NA	NA	NA	NA	NA	NA	NA	NA	F22G5.14|F22G5_14	0	0	0
AT1G07485	0	0	1	1	0	0	0	0	0	0	1	1	0	0	0	0	0	1	NA	NA	213.4	210.7	NA	NA	NA	NA	NA	NA	184	156.4	NA	NA	NA	NA	NA	136.4	-	0	0	0
AT1G07490	0	0	0	0	0	0	0	1	0	0	0	0	0	0	0	0	0	0	NA	NA	NA	NA	NA	NA	NA	666.4	NA	NA	NA	NA	NA	NA	NA	NA	NA	NA	DEVIL 9|DVL9|F22G5.13|F22G5_13|ROTUNDIFOLIA like 3	0	0	0
AT1G07500	0	0	0	0	0	0	0	0	0	0	0	0	0	0	0	0	0	1	NA	NA	NA	NA	NA	NA	NA	NA	NA	NA	NA	NA	NA	NA	NA	NA	NA	112.8	F22G5.11|F22G5_11|SIAMESE-RELATED 5|SMR5	0	0	0
AT1G07510	0	1	0	0	0	0	0	0	0	0	0	0	0	0	0	0	0	0	NA	152.5	NA	NA	NA	NA	NA	NA	NA	NA	NA	NA	NA	NA	NA	NA	NA	NA	F22G5.10|F22G5_10|FTSH protease 10	0	0	0
AT1G07520	0	1	1	1	1	1	1	1	0	0	1	1	0	0	0	0	0	1	NA	168.3	308.4	275.5	175.5	143.6	106.2	107.9	NA	NA	168	151.8	NA	NA	NA	NA	NA	230	F22G5.41|F22G5_41	0	0	0
AT1G07530	0	0	0	0	0	0	0	1	0	0	0	0	0	0	0	0	0	0	NA	NA	NA	NA	NA	NA	NA	423.4	NA	NA	NA	NA	NA	NA	NA	NA	NA	NA	ARABIDOPSIS THALIANA GRAS (GAI|ATGRAS2|F22G5.9|F22G5_9|GRAS (GAI|GRAS2|RGA|SCARECROW-like 14|SCR) 2	0	0	0
AT1G07540	0	0	1	1	1	1	1	1	0	0	1	1	0	0	0	0	0	1	NA	NA	165.6	116.1	164.5	190.4	72.8	119.1	NA	NA	122.9	129.8	NA	NA	NA	NA	NA	178.2	F22G5.8|F22G5_8|TRF-like 2	0	0	0
AT1G07560	0	0	1	1	0	0	0	1	0	0	0	0	0	0	0	0	0	0	NA	NA	113.8	96.7	NA	NA	NA	127.4	NA	NA	NA	NA	NA	NA	NA	NA	NA	NA	F22G5.6|F22G5_6	0	0	1
AT1G07570	0	0	0	0	0	0	0	1	0	0	0	0	0	0	0	0	1	0	NA	NA	NA	NA	NA	NA	NA	117.9	NA	NA	NA	NA	NA	NA	NA	NA	186.5	NA	APK1|F22G5.5|F22G5_5	0	0	0
AT1G07580	1	0	1	1	1	1	1	0	1	0	1	1	0	0	0	0	0	1	138	NA	713.4	710.8	339.9	310.7	212.5	NA	172.7	NA	389.5	322.2	NA	NA	NA	NA	NA	627.5	51945.TRNA-ALA-1	0	0	0
AT1G07590	0	0	1	1	1	1	0	0	0	0	0	0	0	0	0	0	0	1	NA	NA	380.8	396.6	185.8	178.4	NA	NA	NA	NA	NA	NA	NA	NA	NA	NA	NA	297.5	F22G5.3|F22G5_3	0	0	0
AT1G07615	0	0	0	0	0	0	0	1	0	0	0	0	0	0	0	0	0	0	NA	NA	NA	NA	NA	NA	NA	135.1	NA	NA	NA	NA	NA	NA	NA	NA	NA	NA	-	0	0	0
AT1G07630	0	1	1	1	1	1	1	0	0	0	1	1	0	0	0	0	0	1	NA	318.3	382.9	434.8	207	246.6	104.3	NA	NA	NA	226.7	192.2	NA	NA	NA	NA	NA	306.7	F24B9.31|F24B9_31|pol-like 5	0	0	0
AT1G07640	0	0	0	0	0	0	0	1	0	0	0	0	0	0	0	0	0	0	NA	NA	NA	NA	NA	NA	NA	114.6	NA	NA	NA	NA	NA	NA	NA	NA	NA	NA	F24B9.30|F24B9_30|UAS-TAGGED ROOT PATTERNING3|URP3|ZINC FINGER PROTEIN OBP2	0	0	0
AT1G07645	0	0	0	0	0	0	1	0	0	0	0	0	0	0	0	0	0	0	NA	NA	NA	NA	NA	NA	78.7	NA	NA	NA	NA	NA	NA	NA	NA	NA	NA	NA	ATDSI-1VOC|dessication-induced 1VOC superfamily protein	0	0	0
AT1G07650	0	0	1	1	1	1	1	1	0	0	1	1	0	0	0	0	0	1	NA	NA	317.3	368.1	167.4	136.7	183	153.1	NA	NA	254.8	218.7	NA	NA	NA	NA	NA	261.8	F24B9.29|F24B9_29	0	0	1
AT1G07670	0	1	1	1	1	1	1	0	0	0	1	1	0	0	0	0	0	1	NA	195.9	215.6	201.1	153.2	142.7	135.7	NA	NA	NA	177.3	175.5	NA	NA	NA	NA	NA	165.9	ATECA4|F24B9.24|F24B9_24|endomembrane-type CA-ATPase 4	0	0	0
AT1G07680	0	0	0	0	0	0	0	1	0	0	0	0	0	0	0	0	0	0	NA	NA	NA	NA	NA	NA	NA	271	NA	NA	NA	NA	NA	NA	NA	NA	NA	NA	F24B9.23|F24B9_23	0	0	0
AT1G07705	0	0	0	0	0	0	0	0	0	0	0	0	0	0	0	0	1	0	NA	NA	NA	NA	NA	NA	NA	NA	NA	NA	NA	NA	NA	NA	NA	NA	119.4	NA	NOT2a|Negative on TATA less2a	0	0	0
AT1G07720	0	0	1	1	0	0	0	0	0	0	0	0	0	0	0	0	0	0	NA	NA	146	160.7	NA	NA	NA	NA	NA	NA	NA	NA	NA	NA	NA	NA	NA	NA	3-ketoacyl-CoA synthase 3|F24B9.18|F24B9_18	0	0	1
AT1G07728	0	0	0	0	0	1	0	0	0	0	1	0	0	0	0	0	0	0	NA	NA	NA	NA	NA	128.1	NA	NA	NA	NA	134.5	NA	NA	NA	NA	NA	NA	NA	-	0	0	0
AT1G07745	0	0	0	0	0	0	1	1	0	0	0	0	0	0	0	0	0	0	NA	NA	NA	NA	NA	NA	59	315	NA	NA	NA	NA	NA	NA	NA	NA	NA	NA	ATRAD51D|F24B9.14|F24B9_14|SSN1|SUPPRESOR OF SNI1|homolog of RAD51 D	0	0	0
AT1G07747	0	0	0	0	0	0	0	1	0	0	0	0	0	0	0	0	0	0	NA	NA	NA	NA	NA	NA	NA	111.9	NA	NA	NA	NA	NA	NA	NA	NA	NA	NA	-	0	0	0
AT1G07760	0	0	0	0	0	0	1	0	0	0	0	0	0	0	0	0	0	0	NA	NA	NA	NA	NA	NA	49.2	NA	NA	NA	NA	NA	NA	NA	NA	NA	NA	NA	51805.TRNA-HIS-1	0	0	0
AT1G07800	0	0	0	0	0	0	0	1	0	0	0	0	0	0	0	0	0	0	NA	NA	NA	NA	NA	NA	NA	212.3	NA	NA	NA	NA	NA	NA	NA	NA	NA	NA	F24B9.35	0	0	0
AT1G07820	0	0	1	1	1	0	0	0	0	0	0	0	0	0	0	0	0	1	NA	NA	117.8	135.3	82.3	NA	NA	NA	NA	NA	NA	NA	NA	NA	NA	NA	NA	81.9	F24B9.8	0	0	0
AT1G07830	0	1	0	0	0	0	0	0	0	0	0	0	0	0	0	0	0	0	NA	117.5	NA	NA	NA	NA	NA	NA	NA	NA	NA	NA	NA	NA	NA	NA	NA	NA	F24B9.7|F24B9_7	0	0	0
AT1G07840	0	0	0	0	0	0	0	1	0	0	0	0	0	0	0	0	0	0	NA	NA	NA	NA	NA	NA	NA	130.9	NA	NA	NA	NA	NA	NA	NA	NA	NA	NA	F24B9.6|F24B9_6	0	0	0
AT1G07870	0	0	1	1	1	1	1	1	0	0	1	1	0	0	0	0	0	1	NA	NA	366.1	316.3	203	155.2	145.6	183.6	NA	NA	193	186.7	NA	NA	NA	NA	NA	196.4	F24B9.4|F24B9_4	0	0	0
AT1G07885	0	0	0	0	0	0	1	0	0	0	0	1	0	0	0	0	0	0	NA	NA	NA	NA	NA	NA	165.3	NA	NA	NA	NA	198.7	NA	NA	NA	NA	NA	NA	-	0	0	0
AT1G07901	0	0	0	0	0	0	0	0	0	0	0	0	0	0	0	0	0	1	NA	NA	NA	NA	NA	NA	NA	NA	NA	NA	NA	NA	NA	NA	NA	NA	NA	136.4	-	0	0	0
AT1G07910	0	0	0	0	0	0	1	0	0	0	0	0	0	0	0	0	0	0	NA	NA	NA	NA	NA	NA	66.9	NA	NA	NA	NA	NA	NA	NA	NA	NA	NA	NA	ARABIDOPSIS THALIANA RNA LIGASE|ATRNL|AtRLG1|RNAligase|T6D22.1|T6D22_1|TRNA LIGASE	1	0	0
AT1G07930	0	0	0	0	0	0	1	0	0	0	0	0	0	0	0	0	0	0	NA	NA	NA	NA	NA	NA	74.8	NA	NA	NA	NA	NA	NA	NA	NA	NA	NA	NA	T6D22.31	0	0	0
AT1G07940	0	0	0	0	0	0	1	0	0	0	0	0	0	0	0	0	0	0	NA	NA	NA	NA	NA	NA	76.7	NA	NA	NA	NA	NA	NA	NA	NA	NA	NA	NA	T6D22.3	0	0	0
AT1G07950	0	0	0	1	0	0	0	1	0	0	0	0	0	0	0	0	0	0	NA	NA	NA	66.7	NA	NA	NA	122.9	NA	NA	NA	NA	NA	NA	NA	NA	NA	NA	T6D22.4|T6D22_4	0	0	0
AT1G07960	0	0	1	0	0	0	0	0	0	0	0	0	0	0	0	0	0	0	NA	NA	73.1	NA	NA	NA	NA	NA	NA	NA	NA	NA	NA	NA	NA	NA	NA	NA	ATPDIL5-1|PDI-like 5-1|T6D22.5|T6D22_5	0	0	0
AT1G07985	0	0	1	1	1	1	1	1	0	0	1	1	0	0	0	0	0	1	NA	NA	142	159.3	190.7	168.6	92.5	277.5	NA	NA	139.3	154.6	NA	NA	NA	NA	NA	118.2	-	0	0	0
AT1G07990	0	0	1	1	0	0	0	1	0	0	0	0	0	0	0	0	0	0	NA	NA	124.2	117.7	NA	NA	NA	140.9	NA	NA	NA	NA	NA	NA	NA	NA	NA	NA	T6D22.8|T6D22_8	0	0	1
AT1G08000	0	0	0	0	0	0	0	1	0	0	0	0	0	0	0	0	1	0	NA	NA	NA	NA	NA	NA	NA	208.3	NA	NA	NA	NA	NA	NA	NA	NA	245.5	NA	GATA transcription factor 10|T6D22.9|T6D22_9	0	0	0
AT1G08010	0	0	0	0	0	1	1	1	0	0	0	0	0	0	0	0	0	0	NA	NA	NA	NA	NA	86.3	108.2	130.1	NA	NA	NA	NA	NA	NA	NA	NA	NA	NA	GATA transcription factor 11|T6D22.28|T6D22_28	0	0	0
AT1G08030	0	0	0	0	0	0	0	1	0	0	0	0	1	0	0	0	0	0	NA	NA	NA	NA	NA	NA	NA	84.7	NA	NA	NA	NA	59.6	NA	NA	NA	NA	NA	AQC1|HPS7|T6D22.29|T6D22_29|active quiescent center1|hypersensitive to Pi starvation 7|tyrosylprotein sulfotransferase	1	0	0
AT1G08032	0	0	0	0	0	1	0	0	0	0	0	0	1	0	0	0	0	0	NA	NA	NA	NA	NA	102	NA	NA	NA	NA	NA	NA	53.2	NA	NA	NA	NA	NA	NoInfo	0	0	0
AT1G08040	0	0	1	0	0	0	0	1	0	0	0	0	1	0	0	0	0	0	NA	NA	78.3	NA	NA	NA	NA	128.9	NA	NA	NA	NA	55.4	NA	NA	NA	NA	NA	T6D22.12|T6D22_12	0	0	0
AT1G08050	0	0	0	0	0	0	0	1	0	0	0	0	1	0	0	0	0	0	NA	NA	NA	NA	NA	NA	NA	153.1	NA	NA	NA	NA	59.6	NA	NA	NA	NA	NA	T6D22.13|T6D22_13	0	0	0
AT1G08070	0	0	0	0	0	0	0	1	0	0	0	0	1	0	0	0	0	0	NA	NA	NA	NA	NA	NA	NA	211.3	NA	NA	NA	NA	47.9	NA	NA	NA	NA	NA	EMB3102|EMBRYO DEFECTIVE 3102|ORGANELLE TRANSCRIPT PROCESSING 82|T6D22.15|T6D22_15	0	0	0
AT1G08080	0	0	0	0	0	0	1	0	0	0	0	0	0	0	0	0	0	0	NA	NA	NA	NA	NA	NA	110.2	NA	NA	NA	NA	NA	NA	NA	NA	NA	NA	NA	A. THALIANA ALPHA CARBONIC ANHYDRASE 7|ATACA7|T6D22.16|T6D22_16|alpha carbonic anhydrase 7	0	0	0
AT1G08090	0	1	1	1	1	1	1	0	0	0	0	0	0	0	0	0	0	1	NA	187.4	317.2	319.1	182.9	101.8	55.1	NA	NA	NA	NA	NA	NA	NA	NA	NA	NA	198.1	ACH1|ATNRT2.1|ATNRT2:1|LATERAL ROOT INITIATION 1|LIN1|NITRATE TRANSPORTER 1|NITRATE TRANSPORTER 2|NITRATE TRANSPORTER 2.1|NRT2|NRT2.1|NRT2;1AT|T6D22.17|T6D22_17|TRANS-MEMBRANE NITRATE TRANSPORTER PROTEIN ATNRT2:1|nitrate transporter 2:1	0	0	0
AT1G08100	1	1	1	1	1	1	1	1	1	0	1	1	0	0	1	0	1	1	100	264.3	492	527.3	424.2	262.6	129.8	80.4	98.8	NA	162.4	147.6	NA	NA	79.1	NA	56.5	337.3	ACH2|ATNRT2.2|NITRATE TRANSPORTER 2|NITRATE TRANSPORTER 2.2|NRT2;2AT|T6D22.18|T6D22_18|nitrate transporter 2.2	0	0	0
AT1G08115	0	0	1	1	1	1	1	1	0	0	1	1	0	0	0	0	0	1	NA	NA	79.5	93.6	83.5	72.7	149.5	61.7	NA	NA	168.3	180.8	NA	NA	NA	NA	NA	105.2	52201.SNRNA00001	0	0	0
AT1G08120	0	1	0	0	0	0	0	0	0	0	0	0	0	0	0	0	0	0	NA	87.2	NA	NA	NA	NA	NA	NA	NA	NA	NA	NA	NA	NA	NA	NA	NA	NA	T6D22.21|T6D22_21	0	0	0
AT1G08125	0	0	0	0	0	0	0	1	0	0	0	0	0	0	0	0	0	0	NA	NA	NA	NA	NA	NA	NA	84.2	NA	NA	NA	NA	NA	NA	NA	NA	NA	NA	-	0	0	0
AT1G08130	0	1	1	1	0	0	1	0	0	0	1	1	0	0	0	0	1	0	NA	77.3	56	53.9	NA	NA	57.1	NA	NA	NA	87.1	69.9	NA	NA	NA	NA	169.6	NA	ATLIG1|DNA ligase 1|T6D22.23	0	0	0
AT1G08140	0	0	0	0	0	0	0	1	0	0	0	0	0	0	0	0	0	0	NA	NA	NA	NA	NA	NA	NA	105.9	NA	NA	NA	NA	NA	NA	NA	NA	NA	NA	ATCHX6A|cation/H+ exchanger 6A	0	0	0
AT1G08180	0	0	1	1	1	1	1	0	0	0	1	1	0	0	0	0	0	1	NA	NA	144	114.6	101.1	107.2	100.3	NA	NA	NA	179.2	167.7	NA	NA	NA	NA	NA	103.2	T23G18.4|T23G18_4	0	0	1
AT1G08190	0	0	0	1	0	0	0	0	0	0	0	0	1	0	0	0	0	1	NA	NA	NA	87.7	NA	NA	NA	NA	NA	NA	NA	NA	54.3	NA	NA	NA	NA	91.9	ATVAM2|ATVPS41|T23G18.5|T23G18_5|VACUOLAR PROTEIN SORTING 41|VAM2|ZIGZAG SUPPRESSOR 2|ZIP2|vacuolar protein sorting 41	0	0	0
AT1G08200	0	1	1	1	1	1	0	1	0	0	0	0	0	0	0	0	0	1	NA	118.2	118.3	142.3	105.4	98.6	NA	103.2	NA	NA	NA	NA	NA	NA	NA	NA	NA	106.6	T23G18.6|T23G18_6|UDP-D-apiose/UDP-D-xylose synthase 2	0	0	0
AT1G08210	0	0	1	1	0	0	0	1	0	0	0	0	0	0	0	0	0	0	NA	NA	126.2	123.1	NA	NA	NA	82.2	NA	NA	NA	NA	NA	NA	NA	NA	NA	NA	-	0	0	0
AT1G08230	0	0	1	1	0	1	0	0	0	0	0	0	0	0	0	0	1	1	NA	NA	157.5	161.9	NA	122.6	NA	NA	NA	NA	NA	NA	NA	NA	NA	NA	167.2	138.8	-	0	0	0
AT1G08240	0	0	0	0	0	0	1	1	0	0	0	0	0	0	0	0	0	0	NA	NA	NA	NA	NA	NA	61	135.9	NA	NA	NA	NA	NA	NA	NA	NA	NA	NA	51687.TRNA-GLY-1	0	0	0
AT1G08250	0	1	1	1	0	1	0	0	0	0	0	0	0	0	0	0	1	1	NA	126.7	130.4	126.6	NA	99.7	NA	NA	NA	NA	NA	NA	NA	NA	NA	NA	206.4	223.8	Arabidopsis thaliana arogenate dehydratase 6|AtADT6|T23G18.10|T23G18_10|arogenate dehydratase 6	0	0	0
AT1G08260	0	0	0	0	0	0	0	1	0	0	0	0	0	0	0	0	0	0	NA	NA	NA	NA	NA	NA	NA	136.9	NA	NA	NA	NA	NA	NA	NA	NA	NA	NA	ABA OVERLY SENSITIVE 4|ABO4|EARLY IN SHORT DAYS 7|EMB142|EMB2284|EMB529|EMBRYO DEFECTIVE 142|EMBRYO DEFECTIVE 2284|EMBRYO DEFECTIVE 529|ESD7|POL2A|T23G18.21|T23G18_21|TILTED 1	0	0	0
AT1G08270	0	1	0	1	0	0	0	1	0	0	0	0	0	0	0	0	0	0	NA	96.7	NA	69.9	NA	NA	NA	155.4	NA	NA	NA	NA	NA	NA	NA	NA	NA	NA	T23G18.12|T23G18_12	0	0	0
AT1G08280	0	0	1	0	0	0	0	0	0	0	0	0	0	0	0	0	0	0	NA	NA	65.5	NA	NA	NA	NA	NA	NA	NA	NA	NA	NA	NA	NA	NA	NA	NA	GALT29A|T23G18.14|T23G18_14|glycosyltransferase 29A	0	0	1
AT1G08290	0	0	0	0	0	0	0	1	0	0	0	0	0	0	0	0	0	0	NA	NA	NA	NA	NA	NA	NA	264.3	NA	NA	NA	NA	NA	NA	NA	NA	NA	NA	T23G18.15|T23G18_15|WIP domain protein 3	0	0	0
AT1G08300	0	0	1	1	0	0	0	0	0	0	0	0	0	0	0	0	0	0	NA	NA	85.5	88.8	NA	NA	NA	NA	NA	NA	NA	NA	NA	NA	NA	NA	NA	NA	NO VEIN-LIKE|T23G18.16|T23G18_16	0	0	0
AT1G08310	0	0	0	0	0	0	0	1	0	0	0	0	0	0	0	0	0	0	NA	NA	NA	NA	NA	NA	NA	118.9	NA	NA	NA	NA	NA	NA	NA	NA	NA	NA	T23G18.18|T23G18_18	0	0	0
AT1G08315	0	0	1	1	0	0	0	0	0	0	0	0	0	0	0	0	0	1	NA	NA	252.7	226.9	NA	NA	NA	NA	NA	NA	NA	NA	NA	NA	NA	NA	NA	260.1	-	0	0	1
AT1G08320	0	0	0	0	0	0	0	1	0	0	1	0	0	0	0	0	0	1	NA	NA	NA	NA	NA	NA	NA	196.8	NA	NA	134.4	NA	NA	NA	NA	NA	NA	112.8	T23G18.22|TGACG (TGA) motif-binding protein 9|bZIP21	0	0	1
AT1G08340	0	0	1	1	0	0	1	1	0	0	0	0	0	0	0	0	0	0	NA	NA	163.9	156.1	NA	NA	68.9	105.2	NA	NA	NA	NA	NA	NA	NA	NA	NA	NA	T23G18.20|T23G18_20	0	0	0
AT1G08400	0	0	0	0	0	0	0	1	0	0	0	0	0	0	0	0	0	0	NA	NA	NA	NA	NA	NA	NA	156.4	NA	NA	NA	NA	NA	NA	NA	NA	NA	NA	T27G7.8|T27G7_8	0	0	0
AT1G08420	0	0	1	0	0	0	0	0	0	0	0	0	0	0	0	0	0	1	NA	NA	62.2	NA	NA	NA	NA	NA	NA	NA	NA	NA	NA	NA	NA	NA	NA	78.5	BRI1 suppressor 1 (BSU1)-like 2|T27G7.10|T27G7_10	0	0	0
AT1G08430	0	0	1	1	0	0	0	0	0	0	0	0	0	0	0	0	0	0	NA	NA	108.1	119	NA	NA	NA	NA	NA	NA	NA	NA	NA	NA	NA	NA	NA	NA	ARABIDOPSIS THALIANA ALUMINUM-ACTIVATED MALATE TRANSPORTER 1|ATALMT1|T27G7.11|T27G7_11|aluminum-activated malate transporter 1	0	0	1
AT1G08440	0	0	1	1	1	0	0	0	0	0	0	0	0	0	0	0	0	1	NA	NA	190.7	206.5	79.4	NA	NA	NA	NA	NA	NA	NA	NA	NA	NA	NA	NA	106.6	T27G7.12|T27G7_12	0	0	0
AT1G08450	0	0	1	1	0	0	0	0	0	0	0	0	0	0	0	0	0	1	NA	NA	169.5	129.9	NA	NA	NA	NA	NA	NA	NA	NA	NA	NA	NA	NA	NA	137.8	A. thaliana calreticulin 3|AtCRT3|CALRETICULIN 3|EBS2|EMS-MUTAGENIZED BRI1 SUPPRESSOR 2|PRIORITY IN SWEET LIFE 1|PSL1|T27G7.13|T27G7_13|calreticulin 3	0	0	0
AT1G08460	0	0	0	0	0	0	0	0	0	0	0	0	0	0	0	0	1	0	NA	NA	NA	NA	NA	NA	NA	NA	NA	NA	NA	NA	NA	NA	NA	NA	138.2	NA	ATHDA8|HDA8|HISTONE DEACETYLASE 8|T27G7.14|T27G7_14|histone deacetylase 8	0	0	0
AT1G08470	0	0	1	0	1	1	0	1	0	0	0	0	0	0	0	0	0	0	NA	NA	168.8	NA	89.5	128.7	NA	96.4	NA	NA	NA	NA	NA	NA	NA	NA	NA	NA	T27G7.16|T27G7_16|strictosidine synthase-like 3	0	0	0
AT1G08500	1	1	1	1	1	1	1	1	0	0	1	1	0	0	0	0	0	1	167.5	176.8	223.2	229.9	181.4	156.7	161.3	122.4	NA	NA	271.2	256.4	NA	NA	NA	NA	NA	263.9	AtENODL18|T27G7.18|T27G7_18|early nodulin-like protein 18	0	0	0
AT1G08510	0	0	0	0	0	0	0	1	0	0	0	0	0	0	0	0	0	0	NA	NA	NA	NA	NA	NA	NA	108.1	NA	NA	NA	NA	NA	NA	NA	NA	NA	NA	T27G7.19|T27G7_19|fatty acyl-ACP thioesterases B	0	0	0
AT1G08540	0	0	0	0	0	0	0	1	0	0	0	0	0	0	0	0	0	0	NA	NA	NA	NA	NA	NA	NA	138.6	NA	NA	NA	NA	NA	NA	NA	NA	NA	NA	ABC1|ATSIG1|ATSIG2|PUTATIVE PLASTID RNA POLYMERASE SIGMA-SUBUNIT|RNA POLYMERASE SIGMA SUBUNIT 1|RNApolymerase sigma subunit 2|SIG1|SIGA|SIGB|SIGMA FACTOR 1|SIGMA FACTOR 2|SIGMA FACTOR B|T27G7.22	0	0	0
AT1G08560	0	0	1	1	1	0	1	1	0	0	1	1	0	0	0	0	0	1	NA	NA	340.5	283.2	122.1	NA	76.7	397.6	NA	NA	191.6	185.6	NA	NA	NA	NA	NA	188.5	ATSYP111|F22O13.4|F22O13_4|KN|KNOLLE|syntaxin of plants 111|syntaxin of plants 111	0	0	0
AT1G08590	1	0	1	0	1	1	1	0	0	0	1	1	0	0	0	0	0	0	131.8	NA	82.8	NA	80.4	106.6	118	NA	NA	NA	143.2	147.8	NA	NA	NA	NA	NA	NA	F22O13.7|F22O13_7|PXL1|PXY-like1	0	0	1
AT1G08592	0	1	0	0	0	0	0	0	0	0	0	0	0	0	0	0	0	0	NA	104.1	NA	NA	NA	NA	NA	NA	NA	NA	NA	NA	NA	NA	NA	NA	NA	NA	-	0	0	0
AT1G08600	0	0	0	0	0	0	0	1	0	0	0	0	0	0	0	0	0	0	NA	NA	NA	NA	NA	NA	NA	242.5	NA	NA	NA	NA	NA	NA	NA	NA	NA	NA	CHR20|F22O13.8|F22O13_8	0	0	0
AT1G08610	0	1	1	0	0	0	0	1	0	0	0	0	0	0	0	0	0	0	NA	130.2	68.1	NA	NA	NA	NA	346.9	NA	NA	NA	NA	NA	NA	NA	NA	NA	NA	F22O13.9|F22O13_9	0	0	0
AT1G08620	0	1	0	0	0	0	0	0	0	0	1	0	0	0	0	0	0	0	NA	88.2	NA	NA	NA	NA	NA	NA	NA	NA	77.5	NA	NA	NA	NA	NA	NA	NA	F22O13.10|F22O13_10	0	0	0
AT1G08630	0	1	1	1	0	0	0	1	0	0	0	0	0	0	0	0	0	1	NA	119.3	130.5	120.9	NA	NA	NA	152.1	NA	NA	NA	NA	NA	NA	NA	NA	NA	147.7	F22O13.11|F22O13_11|threonine aldolase 1	0	0	0
AT1G08650	0	0	0	0	0	1	1	0	0	0	0	0	0	0	0	0	0	0	NA	NA	NA	NA	NA	167.4	120	NA	NA	NA	NA	NA	NA	NA	NA	NA	NA	NA	ATPPCK1|PHOSPHOENOLPYRUVATE CARBOXYLASE KINASE|PHOSPHOENOLPYRUVATE CARBOXYLASE KINASE 1|phosphoenolpyruvate carboxylase kinase 1	0	0	0
AT1G08660	0	0	0	0	0	0	0	1	0	0	0	0	0	0	0	0	0	0	NA	NA	NA	NA	NA	NA	NA	233.5	NA	NA	NA	NA	NA	NA	NA	NA	NA	NA	F22O13.14|F22O13_14|MALE GAMETOPHYTE DEFECTIVE 2|SIA1|sialyltransferase-like 1	0	0	0
AT1G08680	0	0	1	0	0	0	0	0	0	0	0	0	0	0	0	0	0	0	NA	NA	70.3	NA	NA	NA	NA	NA	NA	NA	NA	NA	NA	NA	NA	NA	NA	NA	AGD14|ARF GAP-like zinc finger-containing protein ZIGA4|ARF-GAP domain 14|AT1G08690|F22O13.16|F22O13_16	0	0	0
AT1G08730	0	0	0	0	0	0	0	1	0	0	0	0	0	0	0	0	0	0	NA	NA	NA	NA	NA	NA	NA	100.2	NA	NA	NA	NA	NA	NA	NA	NA	NA	NA	ATXIC|F22O13.200|F22O13_200|MYOSIN XI C	0	0	0
AT1G08760	0	0	0	0	0	1	0	0	0	0	0	0	0	0	0	0	0	1	NA	NA	NA	NA	NA	78.8	NA	NA	NA	NA	NA	NA	NA	NA	NA	NA	NA	79.5	F22O13.25|F22O13_25	0	0	0
AT1G08780	0	0	0	0	0	0	0	1	0	0	0	0	0	0	0	0	0	0	NA	NA	NA	NA	NA	NA	NA	69.9	NA	NA	NA	NA	NA	NA	NA	NA	NA	NA	ABI3-interacting protein 3|F22O13.27|F22O13_27|PFD4|PREFOLDIN 4	0	0	0
AT1G08790	0	0	0	0	0	0	0	1	0	0	0	0	0	0	0	0	0	0	NA	NA	NA	NA	NA	NA	NA	90.2	NA	NA	NA	NA	NA	NA	NA	NA	NA	NA	F22O13.28|F22O13_28	0	0	0
AT1G08800	0	0	1	1	0	1	0	0	0	0	0	0	0	0	0	0	0	0	NA	NA	144.4	137.9	NA	96.7	NA	NA	NA	NA	NA	NA	NA	NA	NA	NA	NA	NA	F22O13.29|F22O13_29|MyoB1|myosin binding protein 1	0	0	0
AT1G08810	0	0	0	0	0	0	1	1	0	0	0	0	1	0	0	0	1	0	NA	NA	NA	NA	NA	NA	66.9	177.3	NA	NA	NA	NA	64.6	NA	NA	NA	175.9	NA	AtMYB60|F22O13.30|F22O13_30|myb domain protein 60	0	0	0
AT1G08830	0	0	1	1	0	0	0	1	0	0	0	0	0	0	0	0	0	1	NA	NA	109.2	79	NA	NA	NA	248.8	NA	NA	NA	NA	NA	NA	NA	NA	NA	70.6	AtSOD1|F22O13.32|F22O13_32|SOD1|copper/zinc superoxide dismutase 1|superoxide dismutase 1	0	0	1
AT1G08840	0	0	0	0	0	0	0	1	0	0	0	0	1	0	0	0	0	0	NA	NA	NA	NA	NA	NA	NA	131.1	NA	NA	NA	NA	40.6	NA	NA	NA	NA	NA	embryo defective 2411	0	0	0
AT1G08845	0	1	0	0	0	0	1	0	0	0	0	0	0	0	0	0	0	0	NA	105.2	NA	NA	NA	NA	45.2	NA	NA	NA	NA	NA	NA	NA	NA	NA	NA	NA	-	0	0	0
AT1G08860	0	1	1	1	1	1	0	0	0	0	1	1	0	0	0	0	0	1	NA	128.8	329.4	279.5	120.7	114.9	NA	NA	NA	NA	139.3	115.6	NA	NA	NA	NA	NA	217.6	BONZAI 3|F7G19.25|F7G19_25	0	0	0
AT1G08870	0	0	0	0	0	0	0	1	0	0	0	0	0	0	0	0	0	0	NA	NA	NA	NA	NA	NA	NA	163.6	NA	NA	NA	NA	NA	NA	NA	NA	NA	NA	50888.TRNA-ALA-1	0	0	0
AT1G08890	0	0	1	1	1	0	0	0	0	0	1	1	0	0	0	0	0	1	NA	NA	198	153	102.9	NA	NA	NA	NA	NA	146.3	143.5	NA	NA	NA	NA	NA	125.8	F7G19.23|F7G19_23	0	0	0
AT1G08910	0	1	1	1	1	1	0	1	0	0	1	1	0	0	0	0	0	1	NA	88.9	103.1	99.2	89.7	108.4	NA	121.4	NA	NA	139.6	137.2	NA	NA	NA	NA	NA	114.8	F7G19.21|F7G19_21|PIAL1|PROTEIN INHIBITOR OF ACTIVATED STAT LIKE 1|embryo defective 3001	0	0	0
AT1G08920	0	0	1	1	0	0	0	1	0	0	0	0	0	0	0	0	1	1	NA	NA	249.8	250.9	NA	NA	NA	207.3	NA	NA	NA	NA	NA	NA	NA	NA	200.6	186.8	ERD (early response to dehydration) six-like 1|F7G19.20|F7G19_20	0	0	1
AT1G08930	0	0	1	1	1	1	0	0	0	0	0	0	0	0	0	0	0	0	NA	NA	320.7	294.6	170.4	251.4	NA	NA	NA	NA	NA	NA	NA	NA	NA	NA	NA	NA	EARLY RESPONSE TO DEHYDRATION 6|F7G19.19|F7G19_19	0	0	0
AT1G08985	0	0	0	0	0	0	0	1	0	0	0	0	0	0	0	0	0	0	NA	NA	NA	NA	NA	NA	NA	131.1	NA	NA	NA	NA	NA	NA	NA	NA	NA	NA	-	0	0	0
AT1G08990	0	0	1	1	1	0	1	0	0	0	0	0	0	0	0	0	0	0	NA	NA	255.8	232.3	163	NA	84.6	NA	NA	NA	NA	NA	NA	NA	NA	NA	NA	NA	F7G19.14|F7G19_14|GUX5|Glucuronic Acid Substitution of Xylan 5|plant glycogenin-like starch initiation protein 5	0	0	0
AT1G09000	0	0	0	0	0	0	0	1	0	0	0	0	0	0	0	0	0	0	NA	NA	NA	NA	NA	NA	NA	89.7	NA	NA	NA	NA	NA	NA	NA	NA	NA	NA	ANP1|F7G19.13|F7G19_13|MAP KINASE KINASE KINASE 1|MAPKKK1|NPK1-related protein kinase 1	0	0	0
AT1G09010	0	0	0	0	0	0	1	0	0	0	0	0	0	0	0	0	0	0	NA	NA	NA	NA	NA	NA	63	NA	NA	NA	NA	NA	NA	NA	NA	NA	NA	NA	F7G19.12|F7G19_12	0	0	1
AT1G09026	0	0	0	0	0	0	0	0	0	0	0	0	0	0	0	0	1	0	NA	NA	NA	NA	NA	NA	NA	NA	NA	NA	NA	NA	NA	NA	NA	NA	245	NA	NoInfo	0	0	0
AT1G09030	0	0	0	0	0	0	0	1	0	0	0	0	0	0	0	0	0	0	NA	NA	NA	NA	NA	NA	NA	72.4	NA	NA	NA	NA	NA	NA	NA	NA	NA	NA	''nuclear factor Y|F7G19.10|F7G19_10|nuclear factor Y|subunit B4|subunit B4''	0	0	0
AT1G09040	0	0	0	0	0	0	0	1	0	0	0	0	0	0	0	0	0	0	NA	NA	NA	NA	NA	NA	NA	63.9	NA	NA	NA	NA	NA	NA	NA	NA	NA	NA	F7G19.9|F7G19_9	0	0	0
AT1G09050	0	0	0	0	0	0	1	1	0	0	0	0	0	0	0	0	0	0	NA	NA	NA	NA	NA	NA	41.3	68.2	NA	NA	NA	NA	NA	NA	NA	NA	NA	NA	F7G19.8|F7G19_8	0	0	0
AT1G09060	0	0	0	0	0	0	0	1	0	0	0	0	0	0	0	0	0	0	NA	NA	NA	NA	NA	NA	NA	96.2	NA	NA	NA	NA	NA	NA	NA	NA	NA	NA	F7G19.7|F7G19_7	0	0	0
AT1G09070	0	1	0	0	0	0	1	0	0	0	0	0	1	0	0	0	1	0	NA	188.4	NA	NA	NA	NA	66.9	NA	NA	NA	NA	NA	55.8	NA	NA	NA	313.2	NA	(AT)SRC2|AtSRC2|F7G19.6|F7G19_6|SOYBEAN GENE REGULATED BY COLD-2|soybean gene regulated by cold-2	0	0	0
AT1G09090	0	0	0	0	0	0	0	1	0	0	0	0	0	0	0	0	0	0	NA	NA	NA	NA	NA	NA	NA	70.2	NA	NA	NA	NA	NA	NA	NA	NA	NA	NA	ATRBOHB|ATRBOHB-BETA|F7G19.4|F7G19_4|respiratory burst oxidase homolog B	0	0	1
AT1G09130	0	1	1	0	0	0	1	1	0	0	1	1	0	0	0	0	0	0	NA	153.2	73.3	NA	NA	NA	151.5	147.1	NA	NA	113.4	112.5	NA	NA	NA	NA	NA	NA	F7G19.1|F7G19_1	0	0	0
AT1G09157	0	0	0	0	0	0	0	1	0	0	0	0	0	0	0	0	0	0	NA	NA	NA	NA	NA	NA	NA	1110.5	NA	NA	NA	NA	NA	NA	NA	NA	NA	NA	-	0	0	0
AT1G09160	0	0	1	1	0	0	0	1	0	0	0	0	0	0	0	0	0	1	NA	NA	89	73.8	NA	NA	NA	128.1	NA	NA	NA	NA	NA	NA	NA	NA	NA	70.9	T12M4.15|T12M4_15	0	0	0
AT1G09180	0	0	1	1	0	0	0	0	0	0	0	0	0	0	0	0	0	1	NA	NA	100.2	69.7	NA	NA	NA	NA	NA	NA	NA	NA	NA	NA	NA	NA	NA	83.6	ATSAR1|ATSARA1A|SECRETION-ASSOCIATED RAS 1|T12M4.12|T12M4_12|secretion-associated RAS super family 1	0	0	0
AT1G09200	0	0	0	0	0	0	0	1	0	0	0	0	0	0	0	0	0	0	NA	NA	NA	NA	NA	NA	NA	147.9	NA	NA	NA	NA	NA	NA	NA	NA	NA	NA	H3.1|T12M4.9|histone 3.1	0	0	0
AT1G09210	0	1	1	1	0	0	0	1	0	0	1	1	0	0	0	0	0	1	NA	96.3	106.9	128.3	NA	NA	NA	307	NA	NA	107.9	96.7	NA	NA	NA	NA	NA	78.5	AtCRT1b|T12M4.8|T12M4_8|calreticulin 1b	0	0	0
AT1G09230	0	0	0	0	0	0	0	1	0	0	0	0	0	0	0	0	0	1	NA	NA	NA	NA	NA	NA	NA	118.6	NA	NA	NA	NA	NA	NA	NA	NA	NA	104.2	T12M4.6|T12M4_6|U11/U12-65K	0	0	0
AT1G09240	0	0	1	0	0	0	0	1	0	0	0	0	0	0	0	0	0	1	NA	NA	104.8	NA	NA	NA	NA	128.4	NA	NA	NA	NA	NA	NA	NA	NA	NA	139.2	ARABIDOPSIS THALIANA NICOTIANAMINE SYNTHASE 3|ATNAS3|T12M4.5|T12M4_5|nicotianamine synthase 3	0	0	0
AT1G09245	0	0	0	0	0	0	0	0	0	0	0	0	0	1	0	0	0	0	NA	NA	NA	NA	NA	NA	NA	NA	NA	NA	NA	NA	NA	117.3	NA	NA	NA	NA	-	0	0	0
AT1G09250	0	0	0	0	0	1	0	0	0	0	1	0	0	0	0	0	1	1	NA	NA	NA	NA	NA	159.4	NA	NA	NA	NA	232.2	NA	NA	NA	NA	NA	203.9	393.8	AIF4|ATBS1 Interacting Factor 4|T12M4.4|T12M4_4	0	0	1
AT1G09260	0	0	1	1	1	1	1	0	0	0	0	0	0	0	0	0	0	1	NA	NA	312.9	322.7	156.3	203.9	206.6	NA	NA	NA	NA	NA	NA	NA	NA	NA	NA	378.7	T12M4.3|T12M4_3	0	0	0
AT1G09270	0	0	0	0	0	0	0	1	0	0	0	0	0	0	0	0	0	0	NA	NA	NA	NA	NA	NA	NA	107.4	NA	NA	NA	NA	NA	NA	NA	NA	NA	NA	T12M4.2|T12M4_2|importin alpha isoform 4	0	0	0
AT1G09280	0	0	0	0	0	0	1	1	0	0	0	0	0	0	0	0	0	0	NA	NA	NA	NA	NA	NA	57.1	122.6	NA	NA	NA	NA	NA	NA	NA	NA	NA	NA	T12M4.1|T12M4_1	0	0	0
AT1G09290	0	1	0	0	0	0	0	1	0	0	0	0	0	0	0	0	0	0	NA	88.9	NA	NA	NA	NA	NA	316	NA	NA	NA	NA	NA	NA	NA	NA	NA	NA	-	0	0	0
AT1G09310	0	0	0	0	1	0	0	0	0	0	0	0	0	0	0	0	0	1	NA	NA	NA	NA	84.9	NA	NA	NA	NA	NA	NA	NA	NA	NA	NA	NA	NA	73.3	T31J12.3|T31J12_3	0	0	0
AT1G09330	0	0	0	0	0	0	0	1	0	0	0	0	0	0	0	0	0	0	NA	NA	NA	NA	NA	NA	NA	370.6	NA	NA	NA	NA	NA	NA	NA	NA	NA	NA	ECH|ECHIDNA|T31J12.5|T31J12_5	0	0	0
AT1G09350	1	1	1	1	1	1	1	1	1	0	1	1	1	1	1	0	1	1	237.2	131.3	158.3	168.1	102.1	101.3	153.5	140.4	89.9	NA	240.8	262.2	84.7	228.7	148.2	NA	147.9	138.1	AtGolS3|F14J9.1|F14J9_1|galactinol synthase 3	0	0	1
AT1G09390	0	1	1	1	1	1	1	1	0	0	1	1	0	0	0	0	0	1	NA	170.8	273.5	245.5	200.5	170.3	202.6	305.5	NA	NA	139	135.5	NA	NA	NA	NA	NA	190.6	F14J9.5|F14J9_5	0	0	0
AT1G09415	0	0	0	0	0	0	0	0	0	0	1	0	0	0	0	0	0	0	NA	NA	NA	NA	NA	NA	NA	NA	NA	NA	91.1	NA	NA	NA	NA	NA	NA	NA	NIM1-interacting 3	0	0	0
AT1G09421	0	0	0	0	0	0	0	1	0	0	0	0	0	0	0	0	0	0	NA	NA	NA	NA	NA	NA	NA	106.6	NA	NA	NA	NA	NA	NA	NA	NA	NA	NA	-	0	0	0
AT1G09430	0	1	1	1	0	0	1	1	0	0	0	0	0	0	0	0	1	1	NA	145.7	127	104	NA	NA	78.7	131.9	NA	NA	NA	NA	NA	NA	NA	NA	154.6	96.7	ATP-citrate lyase A-3|F14J9.9|F14J9_9	0	0	0
AT1G09440	0	1	0	0	0	1	0	1	0	0	1	1	0	0	0	0	1	1	NA	119.6	NA	NA	NA	98.2	NA	129.1	NA	NA	95.9	87.4	NA	NA	NA	NA	562	190.9	F14J9.10|F14J9_10	0	0	1
AT1G09450	0	0	0	0	0	0	1	0	0	0	0	0	0	0	0	0	0	0	NA	NA	NA	NA	NA	NA	57.1	NA	NA	NA	NA	NA	NA	NA	NA	NA	NA	NA	AtHaspin|F14J9.11|F14J9_11|Haspin-related gene	0	0	0
AT1G09460	0	0	1	1	0	0	0	1	0	0	0	0	0	0	1	0	0	0	NA	NA	75	99	NA	NA	NA	109.9	NA	NA	NA	NA	NA	NA	80.8	NA	NA	NA	F14J9.12|F14J9_12	0	0	0
AT1G09470	0	1	0	0	0	0	0	0	0	0	1	1	0	0	0	0	0	1	NA	236.4	NA	NA	NA	NA	NA	NA	NA	NA	142	140.7	NA	NA	NA	NA	NA	193	F14J9.13|F14J9_13	0	0	0
AT1G09500	0	0	1	1	0	0	0	1	0	0	0	0	0	0	0	0	0	1	NA	NA	96.1	116.2	NA	NA	NA	149.9	NA	NA	NA	NA	NA	NA	NA	NA	NA	116.9	F14J9.16|F14J9_16	0	0	0
AT1G09520	1	1	1	1	1	1	1	0	0	0	1	1	1	0	1	0	0	1	187.6	197.3	468.1	447.9	296.2	281.9	259.7	NA	NA	NA	347.2	327.3	68.7	NA	101.7	NA	NA	411.6	F14J9.18|F14J9_18	0	0	0
AT1G09530	1	0	1	1	1	1	1	0	0	0	0	0	0	0	0	0	1	1	202.3	NA	310.8	290.5	205.1	200.8	133.8	NA	NA	NA	NA	NA	NA	NA	NA	NA	297.2	210.4	F14J9.19|F14J9_19|PAP3|PHOTOCURRENT 1|PHYTOCHROME INTERACTING FACTOR 3|PHYTOCHROME-ASSOCIATED PROTEIN 3|POC1|phytochrome interacting factor 3|purple acid phosphatase 3	0	0	0
AT1G09540	0	0	0	0	0	0	0	1	0	0	0	0	0	0	0	0	0	0	NA	NA	NA	NA	NA	NA	NA	129.4	NA	NA	NA	NA	NA	NA	NA	NA	NA	NA	ARABIDOPSIS THALIANA MYB DOMAIN PROTEIN 61|ATMYB61|F14J9.20|F14J9_20|myb domain protein 61	1	0	0
AT1G09560	0	1	1	1	1	1	1	0	1	0	1	0	0	0	0	0	0	1	NA	201.5	316.8	288.1	178.7	203.5	133.8	NA	82.7	NA	134.2	NA	NA	NA	NA	NA	NA	209.4	F14J9.22|F14J9_22|PDGLP1|PLASMODESMAL GERMIN-LIKE PROTEIN 1|germin-like protein 5	0	0	0
AT1G09570	1	0	0	0	1	1	1	0	0	0	1	1	0	0	0	0	1	1	262.8	NA	NA	NA	176.5	178.4	261.7	NA	NA	NA	228	219.5	NA	NA	NA	NA	279.3	190.9	ELONGATED HYPOCOTYL 8|F14J9.23|F14J9_23|FAR RED ELONGATED 1|FAR RED ELONGATED HYPOCOTYL 2|FHY2|FRE1|HY8|phytochrome A	0	0	0
AT1G09575	0	0	0	1	0	0	0	1	0	0	0	0	0	0	0	0	0	1	NA	NA	NA	158.5	NA	NA	NA	276.2	NA	NA	NA	NA	NA	NA	NA	NA	NA	153.5	-	0	0	0
AT1G09600	0	0	0	0	0	0	0	1	0	0	0	0	0	0	0	0	0	0	NA	NA	NA	NA	NA	NA	NA	107.6	NA	NA	NA	NA	NA	NA	NA	NA	NA	NA	F14J9.26|F14J9_26	0	0	0
AT1G09645	0	0	1	1	0	0	0	0	0	0	0	0	0	0	0	0	0	0	NA	NA	90.6	88.9	NA	NA	NA	NA	NA	NA	NA	NA	NA	NA	NA	NA	NA	NA	-	0	0	0
AT1G09650	0	0	0	0	0	0	0	1	0	0	0	0	0	0	0	0	0	0	NA	NA	NA	NA	NA	NA	NA	168.6	NA	NA	NA	NA	NA	NA	NA	NA	NA	NA	F21M12.4|F21M12_4	0	0	0
AT1G09660	0	1	1	1	0	0	1	0	0	0	0	0	0	0	0	0	0	0	NA	111.9	112.4	117.2	NA	NA	104.3	NA	NA	NA	NA	NA	NA	NA	NA	NA	NA	NA	F21M12.5|F21M12_5	0	0	0
AT1G09665	0	0	0	0	0	0	0	1	0	0	0	0	0	0	0	0	0	0	NA	NA	NA	NA	NA	NA	NA	251.5	NA	NA	NA	NA	NA	NA	NA	NA	NA	NA	-	0	0	0
AT1G09690	0	1	1	0	0	0	0	0	0	0	0	0	0	0	0	0	0	0	NA	117.2	76.7	NA	NA	NA	NA	NA	NA	NA	NA	NA	NA	NA	NA	NA	NA	NA	F21M12.8|F21M12_8	0	0	0
AT1G09710	0	0	0	0	0	0	0	0	0	0	0	0	1	0	0	0	0	0	NA	NA	NA	NA	NA	NA	NA	NA	NA	NA	NA	NA	63	NA	NA	NA	NA	NA	F21M12.10|F21M12_10	0	0	0
AT1G09720	0	0	0	0	0	0	0	1	0	0	0	0	0	0	0	0	0	0	NA	NA	NA	NA	NA	NA	NA	186.3	NA	NA	NA	NA	NA	NA	NA	NA	NA	NA	F21M12.11|F21M12_11|Networked 2B	0	0	0
AT1G09730	0	0	1	0	0	0	0	0	0	0	0	0	0	0	0	0	0	0	NA	NA	68.4	NA	NA	NA	NA	NA	NA	NA	NA	NA	NA	NA	NA	NA	NA	NA	F21M12.29|F21M12_29	0	0	0
AT1G09750	1	0	0	0	0	0	0	1	0	0	0	0	0	0	0	0	0	0	128.7	NA	NA	NA	NA	NA	NA	177.3	NA	NA	NA	NA	NA	NA	NA	NA	NA	NA	F21M12.13|F21M12_13	0	0	1
AT1G09760	0	0	0	0	0	0	0	1	0	0	0	0	0	0	0	0	0	0	NA	NA	NA	NA	NA	NA	NA	100.2	NA	NA	NA	NA	NA	NA	NA	NA	NA	NA	F21M12.14|F21M12_14|U2 small nuclear ribonucleoprotein A	0	0	0
AT1G09780	0	1	1	1	0	0	1	0	0	0	1	1	0	0	1	0	0	1	NA	81.5	106.3	92.9	NA	NA	66.9	NA	NA	NA	104.5	97.8	NA	NA	105.4	NA	NA	98.4	2|3-biphosphoglycerate-independent phosphoglycerate mutase 1|F21M12.16|F21M12_16	0	0	0
AT1G09795	0	0	0	0	0	0	0	1	0	0	0	0	0	0	0	0	0	0	NA	NA	NA	NA	NA	NA	NA	101.9	NA	NA	NA	NA	NA	NA	NA	NA	NA	NA	ATATP-PRT2|ATP PHOSPHORIBOSYL TRANSFERASE 2|ATP phosphoribosyl transferase 2|HISN1B	0	0	0
AT1G09800	0	1	1	1	0	0	0	1	0	0	1	1	0	0	0	0	0	0	NA	131.6	75.3	84.9	NA	NA	NA	118.1	NA	NA	134.2	136.4	NA	NA	NA	NA	NA	NA	F21M12.18|F21M12_18	0	0	0
AT1G09810	0	0	1	0	0	0	0	0	0	0	0	0	0	0	0	0	0	0	NA	NA	129.5	NA	NA	NA	NA	NA	NA	NA	NA	NA	NA	NA	NA	NA	NA	NA	F21M12.20|F21M12_20|evolutionarily conserved C-terminal region 11	0	0	0
AT1G09830	0	1	1	1	0	0	1	1	0	0	0	0	1	0	0	0	0	0	NA	90.3	89.2	78	NA	NA	102.3	159.3	NA	NA	NA	NA	60.8	NA	NA	NA	NA	NA	F21M12.22|F21M12_22|purine biosynthesis 2	0	0	0
AT1G09840	0	0	0	0	0	0	0	1	0	0	0	0	0	0	0	0	0	0	NA	NA	NA	NA	NA	NA	NA	161.8	NA	NA	NA	NA	NA	NA	NA	NA	NA	NA	ATSK41|AtHIR1|F21M12.23|F21M12_23|HIR1|hypersensitive induced reaction 1|shaggy-like protein kinase 41	0	0	0
AT1G09850	0	1	1	1	1	1	1	0	0	0	1	0	0	0	0	0	0	1	NA	111.9	125.1	126.8	106.6	112.6	64.9	NA	NA	NA	134.2	NA	NA	NA	NA	NA	NA	98.4	F21M12.24|F21M12_24|xylem bark cysteine peptidase 3	0	0	0
AT1G09860	0	0	0	0	0	0	0	1	0	0	0	0	0	0	0	0	0	0	NA	NA	NA	NA	NA	NA	NA	212.3	NA	NA	NA	NA	NA	NA	NA	NA	NA	NA	ATPUP16|F21M12.25|F21M12_25|purine permease 16	0	0	0
AT1G09870	0	1	0	1	0	0	0	0	0	0	0	0	0	0	0	0	0	0	NA	109	NA	116.8	NA	NA	NA	NA	NA	NA	NA	NA	NA	NA	NA	NA	NA	NA	F21M12.26|F21M12_26	0	0	0
AT1G09890	0	0	1	0	0	0	0	1	0	0	0	0	0	0	0	0	0	0	NA	NA	48.8	NA	NA	NA	NA	168.6	NA	NA	NA	NA	NA	NA	NA	NA	NA	NA	F21M12.28|F21M12_28	0	0	0
AT1G09900	0	1	0	0	0	0	1	1	0	0	0	0	0	0	0	0	0	0	NA	76.2	NA	NA	NA	NA	49.2	100.9	NA	NA	NA	NA	NA	NA	NA	NA	NA	NA	F21M12.38|F21M12_38	0	0	0
AT1G09920	0	0	1	0	0	0	0	1	0	0	0	0	0	0	0	0	0	0	NA	NA	66.1	NA	NA	NA	NA	194.6	NA	NA	NA	NA	NA	NA	NA	NA	NA	NA	F21M12.31|F21M12_31	0	0	0
AT1G09940	0	0	0	0	0	0	0	1	0	0	0	0	0	0	0	0	0	0	NA	NA	NA	NA	NA	NA	NA	168.3	NA	NA	NA	NA	NA	NA	NA	NA	NA	NA	F21M12.33|F21M12_33	0	0	1
AT1G09950	0	0	1	1	0	0	1	1	0	0	0	0	0	0	0	0	0	1	NA	NA	402.6	434.5	NA	NA	86.6	289.5	NA	NA	NA	NA	NA	NA	NA	NA	NA	254.3	F21M12.34|F21M12_34|RESPONSE TO ABA AND SALT 1	0	0	1
AT1G09960	1	1	1	1	1	1	1	0	0	0	1	0	0	0	0	0	0	1	137.2	226.6	350	303.5	174.8	209.8	104.3	NA	NA	NA	221.3	NA	NA	NA	NA	NA	NA	220.7	ATSUC4|ATSUT4|F21M12.35|F21M12_35|SUC4|SUCROSE TRANSPORTER 4|sucrose transporter 4	0	0	1
AT1G09970	0	0	1	1	1	1	0	0	0	0	0	0	0	0	0	0	0	1	NA	NA	418.3	388.8	159	145.2	NA	NA	NA	NA	NA	NA	NA	NA	NA	NA	NA	236.8	F21M12.36|F21M12_36|RLK7|receptor-like kinase 7	0	0	0
AT1G09980	0	0	1	1	1	1	1	1	0	0	1	1	0	0	0	0	0	1	NA	NA	236.6	220.5	180	170.1	94.4	178.8	NA	NA	143.8	152.8	NA	NA	NA	NA	NA	251.9	T27I1.1	0	0	0
AT1G10000	0	0	0	0	0	0	0	1	0	0	0	0	0	0	0	0	0	1	NA	NA	NA	NA	NA	NA	NA	130.9	NA	NA	NA	NA	NA	NA	NA	NA	NA	148.7	T27I1.2|T27I1_2	0	0	0
AT1G10020	1	1	1	1	1	1	1	0	1	0	1	1	0	0	1	0	0	1	143.4	244.6	444.8	390.8	346.1	262.8	224.3	NA	133.7	NA	322.2	323.3	NA	NA	94.9	NA	NA	406.8	T27I1.4|T27I1_4	0	0	0
AT1G10030	0	0	1	1	1	0	0	0	0	0	0	0	0	0	0	0	0	0	NA	NA	269.1	234.7	187.2	NA	NA	NA	NA	NA	NA	NA	NA	NA	NA	NA	NA	NA	T27I1.5|T27I1_5|homolog of yeast ergosterol28	0	0	0
AT1G10040	0	1	1	1	1	1	0	0	0	0	1	0	0	0	0	0	0	1	NA	100.6	185.2	164.6	102.9	84.4	NA	NA	NA	NA	117.2	NA	NA	NA	NA	NA	NA	100.4	T27I1.6|T27I1_6	0	0	0
AT1G10060	0	1	0	0	0	0	0	0	0	0	0	0	0	0	0	0	0	1	NA	148.6	NA	NA	NA	NA	NA	NA	NA	NA	NA	NA	NA	NA	NA	NA	NA	238.9	ATBCAT-1|BCAT1|T27I1.8|T27I1_8|branched-chain amino acid transaminase 1|branched-chain amino acid transferase 1	0	0	0
AT1G10070	0	1	1	1	1	0	1	1	0	0	1	0	0	0	0	0	0	1	NA	158.1	477.7	479.8	98.3	NA	202.6	530	NA	NA	244.1	NA	NA	NA	NA	NA	NA	335.9	ATBCAT-2|BCAT2|T27I1.9|T27I1_9|branched-chain amino acid transaminase 2|branched-chain amino acid transferase 2	0	0	1
AT1G10090	0	1	1	1	1	1	1	1	0	0	1	1	0	0	0	0	0	1	NA	140.1	145.9	131.5	125.5	94.7	102.3	191.8	NA	NA	214.7	190.3	NA	NA	NA	NA	NA	154.9	T27I1.11|T27I1_11	0	0	1
AT1G10095	0	0	0	0	0	0	0	1	0	0	0	0	0	0	0	0	0	0	NA	NA	NA	NA	NA	NA	NA	197.6	NA	NA	NA	NA	NA	NA	NA	NA	NA	NA	-	0	0	0
AT1G10110	0	1	1	1	0	0	1	1	0	0	0	0	0	0	0	0	0	0	NA	132.7	126.3	155.3	NA	NA	70.8	162.3	NA	NA	NA	NA	NA	NA	NA	NA	NA	NA	T27I1.14|T27I1_14	0	0	0
AT1G10130	0	0	0	1	0	0	0	1	0	0	0	0	0	0	0	0	1	0	NA	NA	NA	99.7	NA	NA	NA	83.9	NA	NA	NA	NA	NA	NA	NA	NA	418	NA	ARABIDOPSIS THALIANA ER-TYPE CA2+-ATPASE 3|ATECA3|T27I1.16|T27I1_16|endoplasmic reticulum-type calcium-transporting ATPase 3	0	0	0
AT1G10140	1	0	1	1	1	1	1	1	0	0	1	1	1	0	1	0	0	1	165.9	NA	502.3	439.4	325.1	272.3	212.5	129.4	NA	NA	258.8	234.3	57	NA	124.2	NA	NA	270.4	F14N23.2|F14N23_2	0	0	0
AT1G10170	0	0	0	0	0	0	0	1	0	0	0	0	0	0	0	0	0	0	NA	NA	NA	NA	NA	NA	NA	166.1	NA	NA	NA	NA	NA	NA	NA	NA	NA	NA	ATNFXL1|F14N23.5|F14N23_5|NF-X-like 1	0	0	0
AT1G10180	0	1	1	1	1	1	0	1	0	0	0	0	0	0	0	0	0	0	NA	111.5	114.9	111	86.6	81.3	NA	456.1	NA	NA	NA	NA	NA	NA	NA	NA	NA	NA	F14N23.6|F14N23_6	0	0	0
AT1G10200	0	0	1	1	1	1	0	1	0	0	0	0	1	0	0	0	1	1	NA	NA	349.2	337.9	164.9	98	NA	203.3	NA	NA	NA	NA	50.5	NA	NA	NA	281.7	275.9	AtWLIM1|F14N23.8|F14N23_8	0	0	1
AT1G10210	1	0	0	0	0	0	0	1	0	0	0	0	0	0	0	0	0	0	163.6	NA	NA	NA	NA	NA	NA	154.9	NA	NA	NA	NA	NA	NA	NA	NA	NA	NA	ATMPK1|F14N23.9|F14N23_9|MITOGEN-ACTIVATED PROTEIN KINASE|mitogen-activated protein kinase 1	1	0	0
AT1G10230	0	1	1	1	1	1	1	0	0	0	1	1	0	0	0	0	0	1	NA	176.8	541	479.9	410.2	309.7	98.4	NA	NA	NA	177.8	162.2	NA	NA	NA	NA	NA	347.9	ASK18|F14N23.11|F14N23_11|SKP1-like 18	0	0	0
AT1G10240	0	0	0	0	0	0	0	1	0	0	0	0	0	0	0	0	0	0	NA	NA	NA	NA	NA	NA	NA	83.7	NA	NA	NA	NA	NA	NA	NA	NA	NA	NA	F14N23.12|F14N23_12|FAR1-related sequence 11	0	0	0
AT1G10270	0	0	0	0	0	0	0	1	0	0	0	0	0	0	0	0	0	0	NA	NA	NA	NA	NA	NA	NA	380.1	NA	NA	NA	NA	NA	NA	NA	NA	NA	NA	F14N23.15|F14N23_15|glutamine-rich protein 23	0	0	1
AT1G10280	0	1	1	1	1	0	0	1	0	0	0	0	0	0	0	0	0	1	NA	84.3	149.5	143.5	117.4	NA	NA	167.8	NA	NA	NA	NA	NA	NA	NA	NA	NA	101.8	F14N23.16|F14N23_16	0	0	0
AT1G10300	0	0	0	0	0	0	0	1	0	0	0	0	0	0	0	0	0	0	NA	NA	NA	NA	NA	NA	NA	162.8	NA	NA	NA	NA	NA	NA	NA	NA	NA	NA	F14N23.18|F14N23_18	0	0	0
AT1G10320	0	1	0	0	0	0	1	1	0	0	0	0	0	0	0	0	0	0	NA	93.9	NA	NA	NA	NA	61	97.7	NA	NA	NA	NA	NA	NA	NA	NA	NA	NA	F14N23.20|F14N23_20	0	0	0
AT1G10330	0	0	0	0	0	0	0	1	0	0	0	0	0	0	0	0	0	0	NA	NA	NA	NA	NA	NA	NA	140.4	NA	NA	NA	NA	NA	NA	NA	NA	NA	NA	F14N23.21|F14N23_21	0	0	0
AT1G10340	0	0	1	1	0	0	0	0	0	0	0	0	0	0	0	0	0	1	NA	NA	172	184.6	NA	NA	NA	NA	NA	NA	NA	NA	NA	NA	NA	NA	NA	95.6	F14N23.22|F14N23_22	0	0	0
AT1G10350	0	0	0	0	0	0	0	1	0	0	0	0	0	0	0	0	0	0	NA	NA	NA	NA	NA	NA	NA	294.2	NA	NA	NA	NA	NA	NA	NA	NA	NA	NA	F14N23.23|F14N23_23	0	0	1
AT1G10370	0	1	1	1	1	1	0	0	0	0	1	1	0	0	0	0	1	1	NA	151	186.3	163.4	106.1	124.9	NA	NA	NA	NA	191.3	153.1	NA	NA	NA	NA	177.8	328	ATGSTU17|EARLY-RESPONSIVE TO DEHYDRATION 9|F14N23.26|F14N23_26|GLUTATHIONE S-TRANSFERASE|GLUTATHIONE S-TRANSFERASE 30|GLUTATHIONE S-TRANSFERASE 30B|GLUTATHIONE S-TRANSFERASE TAU 17|GLUTATHIONE S-TRANSFERASE U17|GST30|GST30B|GSTU17	0	0	0
AT1G10390	0	0	0	0	0	0	0	1	0	0	0	0	0	0	0	0	0	0	NA	NA	NA	NA	NA	NA	NA	147.1	NA	NA	NA	NA	NA	NA	NA	NA	NA	NA	F14N23.29|F14N23_29	0	0	0
AT1G10410	0	0	0	1	1	1	1	1	0	1	1	1	0	0	0	0	0	1	NA	NA	NA	193.9	165.7	182	112.1	137.1	NA	170.6	223.6	235.3	NA	NA	NA	NA	NA	236.5	F14N23.31|F14N23_31	0	0	0
AT1G10419	0	0	0	0	0	0	0	0	0	0	0	0	0	0	0	0	1	0	NA	NA	NA	NA	NA	NA	NA	NA	NA	NA	NA	NA	NA	NA	NA	NA	154.2	NA	-	0	0	0
AT1G10440	0	1	1	1	0	0	0	0	0	0	0	0	0	0	0	0	0	0	NA	103	107.5	109	NA	NA	NA	NA	NA	NA	NA	NA	NA	NA	NA	NA	NA	NA	51200.TRNA-PRO-1	0	0	0
AT1G10450	0	0	0	0	0	0	1	1	0	0	0	0	0	0	0	0	0	0	NA	NA	NA	NA	NA	NA	57.1	83.4	NA	NA	NA	NA	NA	NA	NA	NA	NA	NA	SIN3-like 6|T10O24.5|T10O24_5	0	0	0
AT1G10460	1	0	0	0	0	0	0	1	0	0	0	0	1	0	0	0	0	0	217.8	NA	NA	NA	NA	NA	NA	261.8	NA	NA	NA	NA	64.6	NA	NA	NA	NA	NA	T10O24.6|germin-like protein 7	0	0	0
AT1G10470	0	1	0	0	0	0	0	0	0	0	0	0	0	0	0	0	0	1	NA	224.1	NA	NA	NA	NA	NA	NA	NA	NA	NA	NA	NA	NA	NA	NA	NA	228.9	ATRR1|IBC7|INDUCED BY CYTOKININ 7|MEE7|RESPONCE REGULATOR 1|T10O24.8|T10O24_8|maternal effect embryo arrest 7|response regulator 4	0	0	0
AT1G10480	0	0	0	0	0	0	0	1	0	0	0	0	0	0	0	0	0	0	NA	NA	NA	NA	NA	NA	NA	318.7	NA	NA	NA	NA	NA	NA	NA	NA	NA	NA	T10O24.9|T10O24_9|zinc finger protein 5	0	0	0
AT1G10490	0	0	0	0	0	0	1	0	0	0	0	0	0	0	0	0	0	0	NA	NA	NA	NA	NA	NA	88.5	NA	NA	NA	NA	NA	NA	NA	NA	NA	NA	NA	T10O24.10|T10O24_10	0	0	0
AT1G10500	0	0	0	0	0	0	0	1	0	0	0	1	0	0	0	0	0	0	NA	NA	NA	NA	NA	NA	NA	204.6	NA	NA	NA	78	NA	NA	NA	NA	NA	NA	ATCPISCA|T10O24.11|T10O24_11|chloroplast-localized ISCA-like protein	0	0	0
AT1G10510	0	1	0	0	0	0	1	0	0	0	1	0	0	0	0	0	0	0	NA	106.9	NA	NA	NA	NA	53.1	NA	NA	NA	71.9	NA	NA	NA	NA	NA	NA	NA	T10O24.12|T10O24_12|embryo defective 2004	0	0	0
AT1G10520	0	0	1	0	0	0	0	1	0	0	0	0	0	0	0	0	0	0	NA	NA	73	NA	NA	NA	NA	331.7	NA	NA	NA	NA	NA	NA	NA	NA	NA	NA	AtPol{lambda}|DNA polymerase {lambda}|T10O24.13|T10O24_13	0	0	0
AT1G10530	0	0	1	1	0	0	0	0	0	0	0	0	0	0	0	0	0	0	NA	NA	92.8	85	NA	NA	NA	NA	NA	NA	NA	NA	NA	NA	NA	NA	NA	NA	T10O24.15|T10O24_15	0	0	0
AT1G10540	0	0	0	0	0	0	0	1	0	0	0	0	0	0	0	0	0	0	NA	NA	NA	NA	NA	NA	NA	235	NA	NA	NA	NA	NA	NA	NA	NA	NA	NA	ATNAT8|T10O24.16|T10O24_16|nucleobase-ascorbate transporter 8	0	0	0
AT1G10550	0	0	0	0	0	1	0	0	0	0	0	0	0	0	0	0	0	1	NA	NA	NA	NA	NA	195.4	NA	NA	NA	NA	NA	NA	NA	NA	NA	NA	NA	161.4	T10O24.17|T10O24_17|XET|XYLOGLUCAN ENDOTRANSGLYCOSYLASE|XYLOGLUCAN:XYLOGLUCOSYL TRANSFERASE 33|xyloglucan:xyloglucosyl transferase 33	0	0	1
AT1G10560	0	1	1	1	1	1	1	0	0	0	1	0	0	0	0	0	0	1	NA	162	215.4	223.8	200.8	211.7	155.4	NA	NA	NA	167.9	NA	NA	NA	NA	NA	NA	162.5	ARABIDOPSIS THALIANA PLANT U-BOX 18|ATPUB18|T10O24.19|T10O24_19|plant U-box 18	0	0	0
AT1G10570	0	0	0	0	0	0	0	1	0	0	0	0	0	0	0	0	0	0	NA	NA	NA	NA	NA	NA	NA	98.2	NA	NA	NA	NA	NA	NA	NA	NA	NA	NA	OVERLY TOLERANT TO SALT 2|T10O24.20|T10O24_20|UB-LIKE PROTEASE 1C|ULP1C	0	0	0
AT1G10580	0	0	0	0	0	0	1	0	0	0	0	0	0	0	0	0	0	0	NA	NA	NA	NA	NA	NA	59	NA	NA	NA	NA	NA	NA	NA	NA	NA	NA	NA	T10O24.21|T10O24_21	0	0	0
AT1G10585	0	0	1	0	0	0	0	1	0	0	0	0	0	0	0	0	1	1	NA	NA	85.8	NA	NA	NA	NA	101.9	NA	NA	NA	NA	NA	NA	NA	NA	127.6	99.4	-	0	0	0
AT1G10586	0	0	0	0	0	0	0	1	0	0	0	0	0	0	0	0	0	0	NA	NA	NA	NA	NA	NA	NA	96.2	NA	NA	NA	NA	NA	NA	NA	NA	NA	NA	-	0	0	0
AT1G10600	0	1	0	0	0	0	0	0	0	0	0	0	0	0	0	0	0	0	NA	81.9	NA	NA	NA	NA	NA	NA	NA	NA	NA	NA	NA	NA	NA	NA	NA	NA	F20B24.2|associated molecule with the SH3 domain of STAM 2	0	0	0
AT1G10620	0	0	0	0	0	0	0	1	0	0	0	0	0	0	0	0	0	0	NA	NA	NA	NA	NA	NA	NA	231.5	NA	NA	NA	NA	NA	NA	NA	NA	NA	NA	AtPERK11|F20B24.6|F20B24_6|proline-rich extensin-like receptor kinase 11	0	0	0
AT1G10640	0	0	1	1	0	0	0	1	0	0	0	0	0	0	0	0	1	1	NA	NA	67.4	71.4	NA	NA	NA	157.4	NA	NA	NA	NA	NA	NA	NA	NA	204.4	111.7	F20B24.8|F20B24_8	0	0	0
AT1G10650	0	0	0	0	0	0	1	0	0	0	0	0	0	0	0	0	0	0	NA	NA	NA	NA	NA	NA	82.6	NA	NA	NA	NA	NA	NA	NA	NA	NA	NA	NA	F20B24.9|F20B24_9	0	0	0
AT1G10652	0	0	1	1	1	1	1	0	1	0	0	0	0	0	0	0	0	0	NA	NA	238.3	196.9	143.6	152.7	86.6	NA	88.7	NA	NA	NA	NA	NA	NA	NA	NA	NA	NoInfo	0	0	0
AT1G10657	0	0	0	0	0	0	0	0	0	0	0	0	0	0	0	0	1	1	NA	NA	NA	NA	NA	NA	NA	NA	NA	NA	NA	NA	NA	NA	NA	NA	196.2	195.4	-	0	0	0
AT1G10670	0	0	0	0	0	0	0	1	0	0	0	0	0	0	0	0	0	0	NA	NA	NA	NA	NA	NA	NA	662.1	NA	NA	NA	NA	NA	NA	NA	NA	NA	NA	ATP-citrate lyase A-1|F20B24.11|F20B24_11	0	0	0
AT1G10682	0	0	1	1	0	0	0	1	0	0	0	0	0	0	0	0	0	0	NA	NA	230	197.8	NA	NA	NA	101.2	NA	NA	NA	NA	NA	NA	NA	NA	NA	NA	-	0	0	0
AT1G10690	0	0	0	0	0	0	0	0	0	0	0	0	1	0	0	0	0	0	NA	NA	NA	NA	NA	NA	NA	NA	NA	NA	NA	NA	59.6	NA	NA	NA	NA	NA	T16B5.17|T16B5_17	0	0	0
AT1G10700	0	0	1	0	0	0	1	1	0	0	0	0	1	0	0	0	0	0	NA	NA	162.2	NA	NA	NA	59	373.1	NA	NA	NA	NA	54.7	NA	NA	NA	NA	NA	T16B5.16|phosphoribosyl pyrophosphate (PRPP) synthase 3	0	0	1
AT1G10705	0	0	0	0	0	0	1	0	0	0	0	0	0	0	0	0	0	0	NA	NA	NA	NA	NA	NA	51.2	NA	NA	NA	NA	NA	NA	NA	NA	NA	NA	NA	-	0	0	0
AT1G10710	0	1	0	0	0	0	1	0	0	0	0	0	0	0	0	0	0	0	NA	100.9	NA	NA	NA	NA	57.1	NA	NA	NA	NA	NA	NA	NA	NA	NA	NA	NA	POOR HOMOLOGOUS SYNAPSIS 1|T16B5.15	0	0	0
AT1G10717	0	0	0	0	0	0	0	1	0	0	0	0	0	0	0	0	0	0	NA	NA	NA	NA	NA	NA	NA	87.2	NA	NA	NA	NA	NA	NA	NA	NA	NA	NA	EMBRYO SURROUNDING FACTORS 1.3|ESF1.3	0	0	0
AT1G10740	0	1	1	1	1	1	1	1	0	0	1	1	0	0	0	0	0	1	NA	155.6	187.2	201	126.3	141.2	68.9	219.8	NA	NA	231.1	203.1	NA	NA	NA	NA	NA	195.4	T16B5.12|T16B5_12	0	0	1
AT1G10747	0	0	0	0	0	0	1	1	0	0	0	0	0	0	0	0	1	0	NA	NA	NA	NA	NA	NA	120	227	NA	NA	NA	NA	NA	NA	NA	NA	167.7	NA	EMBRYO SURROUNDING FACTORS 1.1|ESF1.1	0	0	0
AT1G10750	0	0	0	0	1	0	0	1	0	0	0	0	0	0	0	0	0	0	NA	NA	NA	NA	91.8	NA	NA	171.3	NA	NA	NA	NA	NA	NA	NA	NA	NA	NA	T16B5.11|T16B5_11	0	0	0
AT1G10760	0	1	1	1	0	1	0	1	0	0	1	1	0	0	0	0	0	1	NA	78	86.9	75.3	NA	74	NA	298.7	NA	NA	97.3	92	NA	NA	NA	NA	NA	101.8	GWD|GWD1|SOP|SOP1|STARCH EXCESS 1|T16B5.10|T16B5_10	0	0	0
AT1G10810	0	0	0	0	0	0	0	1	0	0	0	0	0	0	0	0	0	0	NA	NA	NA	NA	NA	NA	NA	389.1	NA	NA	NA	NA	NA	NA	NA	NA	NA	NA	T16B5.5|T16B5_5	0	0	0
AT1G10840	0	1	1	1	0	0	0	1	0	0	0	0	0	0	0	0	0	1	NA	169	127	126.3	NA	NA	NA	160.1	NA	NA	NA	NA	NA	NA	NA	NA	NA	111.7	T16B5.2|T16B5_2|translation initiation factor 3 subunit H1	1	0	0
AT1G10850	0	0	0	0	0	0	0	0	0	0	0	0	0	0	0	0	0	1	NA	NA	NA	NA	NA	NA	NA	NA	NA	NA	NA	NA	NA	NA	NA	NA	NA	99.4	-	0	0	0
AT1G10865	0	0	0	0	0	0	0	1	0	0	0	0	0	0	0	0	0	0	NA	NA	NA	NA	NA	NA	NA	238.3	NA	NA	NA	NA	NA	NA	NA	NA	NA	NA	-	0	0	0
AT1G10870	0	0	0	0	0	0	0	1	0	0	0	0	0	0	0	0	0	0	NA	NA	NA	NA	NA	NA	NA	106.4	NA	NA	NA	NA	NA	NA	NA	NA	NA	NA	ARF-GAP domain 4|T19D16.20|T19D16_20	0	0	0
AT1G10890	0	0	0	0	0	0	0	1	0	0	0	0	0	0	0	0	0	0	NA	NA	NA	NA	NA	NA	NA	110.9	NA	NA	NA	NA	NA	NA	NA	NA	NA	NA	T19D16.19|T19D16_19	0	0	0
AT1G10910	1	1	1	1	1	1	1	1	0	0	1	1	1	1	0	0	0	1	131	108.7	175.5	171.3	112.2	131	123.9	522	NA	NA	135.1	120	68	126.1	NA	NA	NA	194.7	EMBRYO DEFECTIVE 3103|T19D16.17|T19D16_17	0	0	0
AT1G10920	0	1	1	1	1	1	0	0	0	0	1	1	0	0	0	0	0	1	NA	90.7	152.4	153.7	102.8	75.6	NA	NA	NA	NA	101.5	89.5	NA	NA	NA	NA	NA	127.8	LOCUS ORCHESTRATING VICTORIN EFFECTS1|T19D16.16|T19D16_16	0	0	0
AT1G10940	0	1	1	1	0	1	1	0	0	0	1	1	0	0	0	0	0	1	NA	91.4	142.1	149.3	NA	94.6	61	NA	NA	NA	88.7	98	NA	NA	NA	NA	NA	113.1	ARABIDOPSIS SERINE/THREONINE KINASE 1|ARABIDOPSIS SKP1 HOMOLOGUE 1|ASK1|SNF1-related protein kinase 2.4|SNRK2-4|SRK2A|SUCROSE NONFERMENTING 1-RELATED PROTEIN KINASE 2-4	0	0	0
AT1G10950	0	0	0	0	0	0	0	1	0	0	0	0	0	0	0	0	0	0	NA	NA	NA	NA	NA	NA	NA	139.9	NA	NA	NA	NA	NA	NA	NA	NA	NA	NA	AtTMN1|EMP12|T19D16.13|T19D16_13|endomembrane protein 12|transmembrane nine 1	0	0	0
AT1G10960	0	1	1	1	1	1	1	1	0	0	1	1	0	0	0	0	0	1	NA	122.8	89.6	87.5	91.1	91.9	108.2	291.5	NA	NA	129.3	149.8	NA	NA	NA	NA	NA	142.2	ATFD1|T19D16.12|T19D16_12|ferredoxin 1	0	0	0
AT1G10990	0	0	0	0	0	0	0	1	0	0	0	0	0	0	0	0	0	0	NA	NA	NA	NA	NA	NA	NA	1612.7	NA	NA	NA	NA	NA	NA	NA	NA	NA	NA	T19D16.27|T19D16_27	0	0	0
AT1G11000	1	0	0	0	1	0	1	0	0	0	1	1	0	1	0	0	0	1	162	NA	NA	NA	97.5	NA	90.5	NA	NA	NA	190	203.3	NA	160.3	NA	NA	NA	162.1	ATMLO4|MILDEW RESISTANCE LOCUS O 4|T19D16.26|T19D16_26	0	0	1
AT1G11010	0	1	1	0	0	0	0	0	0	0	0	0	0	0	0	0	0	0	NA	134.8	95.6	NA	NA	NA	NA	NA	NA	NA	NA	NA	NA	NA	NA	NA	NA	NA	60002.TRNA-MET-1	0	0	0
AT1G11050	0	1	1	1	1	1	1	1	0	0	1	1	0	0	0	0	1	1	NA	144	235.1	191	103.8	107	80.7	89.7	NA	NA	109.7	119.1	NA	NA	NA	NA	120.3	178.9	T19D16.6|T19D16_6	0	0	1
AT1G11060	0	0	0	0	0	0	0	1	0	0	0	0	0	0	0	0	0	0	NA	NA	NA	NA	NA	NA	NA	81.7	NA	NA	NA	NA	NA	NA	NA	NA	NA	NA	AtWAPL1|T19D16.5|T19D16_5|WAPL1|Wings apart-like protein 1	0	0	0
AT1G11070	0	0	0	0	0	0	0	1	0	0	0	0	0	0	0	0	0	0	NA	NA	NA	NA	NA	NA	NA	186.6	NA	NA	NA	NA	NA	NA	NA	NA	NA	NA	T19D16.24|T19D16_24	0	0	0
AT1G11080	0	0	1	0	0	0	0	1	0	0	0	0	0	0	0	0	0	0	NA	NA	91.6	NA	NA	NA	NA	462.3	NA	NA	NA	NA	NA	NA	NA	NA	NA	NA	T19D16.4|T19D16_4|serine carboxypeptidase-like 31	0	0	0
AT1G11090	0	1	1	1	1	1	1	1	1	0	1	1	1	1	1	0	0	1	NA	95.3	418.1	383.2	183.3	143.6	125.9	1410.4	95.2	NA	244.1	253.2	69.9	255.5	145.6	NA	NA	247.5	T19D16.3|T19D16_3	0	0	0
AT1G11100	0	0	1	1	0	0	0	1	0	0	0	0	0	0	0	0	0	1	NA	NA	140.3	106.2	NA	NA	NA	553.5	NA	NA	NA	NA	NA	NA	NA	NA	NA	68.9	FRG5|SNF2-RING-HELICASE?LIKE 5|T19D16.2|T19D16_2	0	0	0
AT1G11120	1	0	0	0	0	0	1	1	0	0	1	1	0	0	0	0	0	1	293.8	NA	NA	NA	NA	NA	184.9	638.1	NA	NA	195	225.4	NA	NA	NA	NA	NA	124.4	T19D16.22|T19D16_22	0	0	1
AT1G11125	0	1	1	1	0	1	1	1	1	0	1	1	0	0	0	0	0	0	NA	124.6	128.5	124.3	NA	104.1	129.8	1362.2	123.3	NA	232.5	228.1	NA	NA	NA	NA	NA	NA	-	0	0	0
AT1G11130	0	0	0	0	0	0	0	1	0	0	0	0	0	0	0	0	0	1	NA	NA	NA	NA	NA	NA	NA	510	NA	NA	NA	NA	NA	NA	NA	NA	NA	138.1	AT1G11140|SCM|SCRAMBLED|SRF9|STRUBBELIG|STRUBBELIG-RECEPTOR FAMILY 9|T19D16.8	0	0	1
AT1G11160	0	0	1	1	1	0	0	1	0	0	1	1	0	0	0	0	1	1	NA	NA	265.8	194.1	86.3	NA	NA	219.3	NA	NA	88.3	81.5	NA	NA	NA	NA	124.7	166.9	T28P6.17|T28P6_17	0	0	0
AT1G11170	0	0	1	1	1	1	0	0	0	0	0	0	0	0	0	0	0	0	NA	NA	197.1	181.4	79.6	92.8	NA	NA	NA	NA	NA	NA	NA	NA	NA	NA	NA	NA	T28P6.16|T28P6_16	0	0	0
AT1G11175	0	0	0	0	0	0	0	1	0	0	0	0	0	0	0	0	0	0	NA	NA	NA	NA	NA	NA	NA	260	NA	NA	NA	NA	NA	NA	NA	NA	NA	NA	-	0	0	0
AT1G11180	0	0	0	0	0	0	1	0	0	0	0	0	0	0	0	0	0	0	NA	NA	NA	NA	NA	NA	59	NA	NA	NA	NA	NA	NA	NA	NA	NA	NA	NA	AtSCAMP2|Secretory carrier membrane protein 2|T28P6.15|T28P6_15	0	0	0
AT1G11185	0	0	1	1	0	0	0	0	0	0	0	0	0	0	0	0	0	0	NA	NA	186.9	194.2	NA	NA	NA	NA	NA	NA	NA	NA	NA	NA	NA	NA	NA	NA	-	0	0	0
AT1G11190	0	0	0	0	0	0	0	1	0	0	0	0	0	0	0	0	0	0	NA	NA	NA	NA	NA	NA	NA	575.5	NA	NA	NA	NA	NA	NA	NA	NA	NA	NA	ENDO1|ENDONUCLEASE 1|T28P6.14|T28P6_14|bifunctional nuclease i	0	0	0
AT1G11210	0	0	1	1	0	0	0	0	0	0	0	0	0	0	0	0	0	1	NA	NA	252.6	245.7	NA	NA	NA	NA	NA	NA	NA	NA	NA	NA	NA	NA	NA	141.5	-	0	0	1
AT1G11230	0	0	0	0	0	0	0	1	0	0	0	0	0	0	0	0	0	0	NA	NA	NA	NA	NA	NA	NA	80.2	NA	NA	NA	NA	NA	NA	NA	NA	NA	NA	T28P6.11|T28P6_11	0	0	0
AT1G11240	0	0	0	0	0	0	0	1	0	0	0	0	0	0	0	0	0	0	NA	NA	NA	NA	NA	NA	NA	112.9	NA	NA	NA	NA	NA	NA	NA	NA	NA	NA	T28P6.24|T28P6_24	0	0	1
AT1G11250	0	1	0	0	0	0	0	0	0	0	0	0	0	0	0	0	1	0	NA	183.5	NA	NA	NA	NA	NA	NA	NA	NA	NA	NA	NA	NA	NA	NA	317	NA	ATSYP125|T28P6.10|T28P6_10|syntaxin of plants 125	0	0	0
AT1G11260	0	0	0	0	0	1	0	1	0	0	0	0	0	0	0	0	0	0	NA	NA	NA	NA	NA	126	NA	141.9	NA	NA	NA	NA	NA	NA	NA	NA	NA	NA	ATSTP1|SUGAR TRANSPORTER 1|T28P6.9|T28P6_9|sugar transporter 1	0	0	1
AT1G11265	0	0	0	0	0	0	1	1	0	0	0	0	0	0	0	0	0	0	NA	NA	NA	NA	NA	NA	157.4	60.2	NA	NA	NA	NA	NA	NA	NA	NA	NA	NA	T28P6.8|T28P6_8	0	0	0
AT1G11270	0	0	0	0	0	0	0	1	0	0	0	0	0	0	0	0	0	0	NA	NA	NA	NA	NA	NA	NA	141.4	NA	NA	NA	NA	NA	NA	NA	NA	NA	NA	T28P6.23|T28P6_23	0	0	0
AT1G11280	0	1	1	1	1	1	1	0	0	0	1	0	0	0	0	0	0	1	NA	90	127.5	135.3	141.4	188.5	80.7	NA	NA	NA	162	NA	NA	NA	NA	NA	NA	105.6	T28P6.7|T28P6_7	0	0	1
AT1G11290	0	0	1	0	0	0	0	1	0	0	0	0	0	0	0	0	0	0	NA	NA	144.8	NA	NA	NA	NA	84.2	NA	NA	NA	NA	NA	NA	NA	NA	NA	NA	CHLORORESPIRATORY REDUCTION22|T28P6.20|T28P6_20	0	0	0
AT1G11300	0	0	0	1	0	0	0	0	0	0	0	0	0	0	0	0	0	1	NA	NA	NA	117	NA	NA	NA	NA	NA	NA	NA	NA	NA	NA	NA	NA	NA	97.7	EGM1|T28P6.6|T28P6_6|enhanced shoot growth under mannitol stress 1	0	0	0
AT1G11310	0	1	1	1	1	1	0	1	1	0	1	1	1	0	0	0	0	1	NA	214.6	380.1	366.5	172	141.5	NA	102.7	99.2	NA	197	145.1	70.6	NA	NA	NA	NA	243	ATMLO2|MILDEW RESISTANCE LOCUS O 2|PMR2|POWDERY MILDEW RESISTANT 2|T28P6.4|T28P6_4	0	0	0
AT1G11320	0	0	1	1	0	0	0	0	0	0	0	0	0	0	0	0	0	0	NA	NA	417.8	348.9	NA	NA	NA	NA	NA	NA	NA	NA	NA	NA	NA	NA	NA	NA	T28P6.3|T28P6_3	0	0	0
AT1G11330	0	1	1	1	0	0	0	1	1	0	1	1	0	0	0	0	0	1	NA	214.2	372.6	348.3	NA	NA	NA	92.2	100	NA	255.1	179.2	NA	NA	NA	NA	NA	325.6	T28P6.2|T28P6_2	0	0	0
AT1G11350	0	0	0	0	0	0	0	1	0	0	0	0	0	0	0	0	0	0	NA	NA	NA	NA	NA	NA	NA	309.5	NA	NA	NA	NA	NA	NA	NA	NA	NA	NA	CALMODULIN-BINDING RECEPTOR-LIKE PROTEIN KINASE|CBRLK1|RKS2|S-domain-1 13|T23J18.2|T23J18_2	0	0	1
AT1G11362	0	1	1	1	1	0	1	0	0	0	1	0	0	0	0	0	0	1	NA	99.2	408.9	384.4	101	NA	47.2	NA	NA	NA	99.7	NA	NA	NA	NA	NA	NA	249.9	-	0	0	0
AT1G11370	0	0	1	1	0	0	0	1	0	0	0	0	0	0	0	0	1	1	NA	NA	217.6	168.5	NA	NA	NA	100.9	NA	NA	NA	NA	NA	NA	NA	NA	176.9	157	T23J18.3|T23J18_3	0	0	0
AT1G11390	0	1	1	1	1	1	1	1	0	0	0	1	0	0	0	0	0	1	NA	124.6	391.2	374.7	212.2	191	114.1	996.1	NA	NA	NA	254.2	NA	NA	NA	NA	NA	317	T23J18.5|T23J18_5	0	0	0
AT1G11400	0	0	0	0	0	0	0	0	0	0	1	0	0	0	0	0	0	0	NA	NA	NA	NA	NA	NA	NA	NA	NA	NA	277	NA	NA	NA	NA	NA	NA	NA	T23J18.7|T23J18_7|partner of Y14-MAGO	0	0	0
AT1G11410	0	0	0	0	0	0	0	0	0	0	0	0	0	0	0	0	0	1	NA	NA	NA	NA	NA	NA	NA	NA	NA	NA	NA	NA	NA	NA	NA	NA	NA	133.3	T23J18.8|T23J18_8	0	0	0
AT1G11420	0	0	0	0	0	0	0	1	0	0	0	0	0	0	0	0	0	0	NA	NA	NA	NA	NA	NA	NA	190.6	NA	NA	NA	NA	NA	NA	NA	NA	NA	NA	ATDUF2|DOMAIN OF UNKNOWN FUNCTION 724 2|T23J18.9|T23J18_9	0	0	0
AT1G11440	1	1	1	1	1	1	1	1	0	0	1	1	0	0	0	0	0	1	145	126	233.4	272	161.2	160.9	236.1	161.6	NA	NA	185.5	190.9	NA	NA	NA	NA	NA	212.8	T23J18.11|T23J18_11	0	0	0
AT1G11480	0	0	1	0	0	0	0	0	0	0	1	0	0	0	0	0	0	0	NA	NA	67.6	NA	NA	NA	NA	NA	NA	NA	85.6	NA	NA	NA	NA	NA	NA	NA	T23J18.15|T23J18_15	0	0	0
AT1G11500	0	0	0	0	0	0	0	1	0	0	0	0	0	0	0	0	0	0	NA	NA	NA	NA	NA	NA	NA	107.1	NA	NA	NA	NA	NA	NA	NA	NA	NA	NA	T23J18.31|T23J18_31	0	0	0
AT1G11530	0	0	0	0	0	0	0	0	0	0	0	0	0	0	0	0	0	1	NA	NA	NA	NA	NA	NA	NA	NA	NA	NA	NA	NA	NA	NA	NA	NA	NA	83.6	ATCXXS1|C-terminal cysteine residue is changed to a serine 1	0	0	1
AT1G11540	0	0	1	0	0	0	0	0	0	0	0	0	0	0	0	0	0	0	NA	NA	150.5	NA	NA	NA	NA	NA	NA	NA	NA	NA	NA	NA	NA	NA	NA	NA	T23J18.20|T23J18_20	0	0	0
AT1G11545	0	0	0	0	0	0	1	1	0	0	0	0	0	0	0	0	0	0	NA	NA	NA	NA	NA	NA	122	200.8	NA	NA	NA	NA	NA	NA	NA	NA	NA	NA	T23J18.21|T23J18_21|xyloglucan endotransglucosylase/hydrolase 8	0	0	0
AT1G11550	0	0	0	0	0	0	0	1	0	0	1	1	0	0	0	0	0	0	NA	NA	NA	NA	NA	NA	NA	148.4	NA	NA	179.6	178.4	NA	NA	NA	NA	NA	NA	51678.TRNA-LEU-1	0	0	0
AT1G11580	0	0	1	1	0	1	0	1	0	0	0	0	0	0	0	0	0	0	NA	NA	236.5	191.1	NA	91.7	NA	138.1	NA	NA	NA	NA	NA	NA	NA	NA	NA	NA	ATPMEPCRA|T23J18.24|T23J18_24|methylesterase PCR A	0	0	0
AT1G11592	0	1	1	1	1	1	1	0	1	0	1	1	0	0	0	0	0	1	NA	98.8	152.2	178.4	123.3	85.7	63	NA	69.5	NA	122.4	127.2	NA	NA	NA	NA	NA	102.1	-	0	0	0
AT1G11608	0	0	0	0	0	0	0	1	0	0	0	0	0	0	0	0	0	0	NA	NA	NA	NA	NA	NA	NA	296	NA	NA	NA	NA	NA	NA	NA	NA	NA	NA	-	0	0	0
AT1G11640	0	0	0	0	0	0	1	0	0	0	0	0	0	0	0	0	0	0	NA	NA	NA	NA	NA	NA	66.9	NA	NA	NA	NA	NA	NA	NA	NA	NA	NA	NA	51344.TRNA-TRP-1	0	0	0
AT1G11650	0	0	0	0	0	0	0	1	0	0	0	0	0	0	0	0	0	0	NA	NA	NA	NA	NA	NA	NA	95.7	NA	NA	NA	NA	NA	NA	NA	NA	NA	NA	ATRBP45B|F25C20.21|F25C20_21	0	0	0
AT1G11655	0	0	1	1	0	0	0	0	0	0	0	0	0	0	0	0	0	1	NA	NA	135.7	148.8	NA	NA	NA	NA	NA	NA	NA	NA	NA	NA	NA	NA	NA	85	-	0	0	0
AT1G11660	0	0	0	0	0	0	1	0	0	0	1	1	0	0	0	0	1	0	NA	NA	NA	NA	NA	NA	76.7	NA	NA	NA	131.6	119.7	NA	NA	NA	NA	145.9	NA	F25C20.19|F25C20_19	0	0	0
AT1G11670	0	0	0	1	1	1	0	1	0	0	0	0	0	0	0	0	0	0	NA	NA	NA	208.8	132.5	173.4	NA	151.1	NA	NA	NA	NA	NA	NA	NA	NA	NA	NA	F25C20.18|F25C20_18	0	0	1
AT1G11680	0	0	0	0	0	0	1	1	0	0	0	0	0	0	0	0	0	0	NA	NA	NA	NA	NA	NA	122	242	NA	NA	NA	NA	NA	NA	NA	NA	NA	NA	CYP51|CYP51A2|CYTOCHROME P450 51|CYTOCHROME P450 51A2|CYTOCHROME P450 51G1|EMB1738|F25C20.17|F25C20_17|embryo defective 1738	0	0	0
AT1G11690	0	0	0	0	0	0	0	1	0	0	0	0	0	0	0	0	0	0	NA	NA	NA	NA	NA	NA	NA	100.4	NA	NA	NA	NA	NA	NA	NA	NA	NA	NA	F25C20.16|F25C20_16	0	0	0
AT1G11700	0	0	0	0	0	0	1	0	0	0	0	0	0	0	0	0	1	0	NA	NA	NA	NA	NA	NA	92.5	NA	NA	NA	NA	NA	NA	NA	NA	NA	203.9	NA	F25C20.15|F25C20_15	0	0	1
AT1G11720	0	0	1	1	1	1	1	1	0	0	0	0	0	0	0	0	0	0	NA	NA	126.7	118.5	123.6	137.9	86.6	81.7	NA	NA	NA	NA	NA	NA	NA	NA	NA	NA	ATSS3|F25C20.13|F25C20_13|STARCH SYNTHASE III|starch synthase 3	0	0	0
AT1G11735	1	0	1	1	0	1	1	1	0	0	1	1	0	0	0	0	0	1	195.4	NA	127.5	120.3	NA	98.4	120	960.8	NA	NA	145.4	148.4	NA	NA	NA	NA	NA	143.6	MIR171B|microRNA171B|p_MI0000989	0	0	0
AT1G11755	0	0	0	0	0	0	0	1	0	0	0	0	0	0	0	0	0	0	NA	NA	NA	NA	NA	NA	NA	84.4	NA	NA	NA	NA	NA	NA	NA	NA	NA	NA	LEAF WILTING 1	0	0	0
AT1G11785	0	0	0	0	0	0	1	0	0	0	0	0	0	0	0	0	0	0	NA	NA	NA	NA	NA	NA	49.2	NA	NA	NA	NA	NA	NA	NA	NA	NA	NA	NA	-	0	0	0
AT1G11790	0	1	1	1	1	1	0	1	0	0	1	1	0	0	0	0	0	1	NA	92.8	156.1	177.6	118	112.6	NA	227	NA	NA	214.5	197.1	NA	NA	NA	NA	NA	242	Arabidopsis thaliana arogenate dehydratase 1|AtADT1|F25C20.4|F25C20_4|arogenate dehydratase 1	0	0	0
AT1G11800	0	1	1	1	0	0	0	1	0	0	0	0	0	0	0	0	0	0	NA	63.9	51.1	67.9	NA	NA	NA	186.6	NA	NA	NA	NA	NA	NA	NA	NA	NA	NA	F25C20.3|F25C20_3	0	0	0
AT1G11820	0	0	1	1	1	1	0	0	0	0	0	0	0	0	0	0	1	1	NA	NA	263	225.1	199.3	134.3	NA	NA	NA	NA	NA	NA	NA	NA	NA	NA	163.3	325.9	-	0	0	0
AT1G11840	0	1	1	1	1	1	1	1	0	0	1	1	0	0	0	0	0	1	NA	268.9	337	318	168.9	108.9	141.6	444.8	NA	NA	278	291.9	NA	NA	NA	NA	NA	268	ATGLX1|F12F1.32|F12F1_32|GLYOXALASE I|glyoxalase I homolog	0	0	0
AT1G11870	0	0	0	0	0	0	0	1	0	0	0	0	0	0	0	0	0	0	NA	NA	NA	NA	NA	NA	NA	123.9	NA	NA	NA	NA	NA	NA	NA	NA	NA	NA	ATSRS|F12F1.29|F12F1_29|OVA7|SERYL-TRNA SYNTHETASE|Seryl-tRNA synthetase|ovule abortion 7	0	0	0
AT1G11890	0	0	0	1	0	0	0	0	0	0	0	0	0	0	0	0	0	0	NA	NA	NA	63.9	NA	NA	NA	NA	NA	NA	NA	NA	NA	NA	NA	NA	NA	NA	ATSEC22|F12F1.27|F12F1_27|SECRETION 22	0	0	0
AT1G11900	0	0	0	0	0	0	0	1	0	0	0	0	0	0	0	0	0	0	NA	NA	NA	NA	NA	NA	NA	114.4	NA	NA	NA	NA	NA	NA	NA	NA	NA	NA	F12F1.26|F12F1_26	0	0	0
AT1G11910	0	1	1	1	0	0	0	0	0	0	1	1	0	0	0	0	1	1	NA	127.7	99.6	101.4	NA	NA	NA	NA	NA	NA	158.9	131.6	NA	NA	NA	NA	175.9	85.7	ATAPA1|F12F1.24|F12F1_24|aspartic proteinase A1	0	0	0
AT1G11915	0	0	0	0	0	0	0	1	0	0	0	0	0	0	0	0	0	0	NA	NA	NA	NA	NA	NA	NA	313.5	NA	NA	NA	NA	NA	NA	NA	NA	NA	NA	-	0	0	0
AT1G11925	0	0	0	0	0	0	0	1	0	0	0	0	0	0	0	0	0	0	NA	NA	NA	NA	NA	NA	NA	257	NA	NA	NA	NA	NA	NA	NA	NA	NA	NA	-	0	0	0
AT1G11930	0	0	0	0	0	1	0	0	0	0	0	0	0	0	0	0	0	0	NA	NA	NA	NA	NA	77.9	NA	NA	NA	NA	NA	NA	NA	NA	NA	NA	NA	NA	F12F1.20|F12F1_20	0	0	0
AT1G11950	0	0	0	0	0	0	0	1	0	0	0	0	1	0	0	0	0	0	NA	NA	NA	NA	NA	NA	NA	146.6	NA	NA	NA	NA	43.3	NA	NA	NA	NA	NA	F12F1.18|F12F1_18	0	0	0
AT1G11960	0	0	0	0	0	1	0	0	0	0	0	0	0	0	0	0	0	0	NA	NA	NA	NA	NA	81.1	NA	NA	NA	NA	NA	NA	NA	NA	NA	NA	NA	NA	F12F1.17|F12F1_17	0	0	0
AT1G11970	0	1	1	1	0	0	1	0	0	0	1	1	0	0	0	0	0	1	NA	118.6	268.8	253.4	NA	NA	210.5	NA	NA	NA	178.7	135.2	NA	NA	NA	NA	NA	150.8	F12F1.16|F12F1_16	0	0	0
AT1G11990	0	0	0	0	0	0	0	1	0	0	0	0	0	0	0	0	0	0	NA	NA	NA	NA	NA	NA	NA	95.7	NA	NA	NA	NA	NA	NA	NA	NA	NA	NA	F12F1.14|F12F1_14	0	0	0
AT1G12000	0	0	1	1	0	0	1	0	0	0	0	0	0	0	0	0	0	0	NA	NA	70	70.1	NA	NA	49.2	NA	NA	NA	NA	NA	NA	NA	NA	NA	NA	NA	F12F1.13|F12F1_13	0	0	0
AT1G12010	0	0	0	0	0	0	0	0	0	0	0	0	0	0	0	0	1	0	NA	NA	NA	NA	NA	NA	NA	NA	NA	NA	NA	NA	NA	NA	NA	NA	181.2	NA	F12F1.12|F12F1_12	0	0	1
AT1G12020	0	0	0	0	0	0	0	1	0	0	0	0	0	0	0	0	1	0	NA	NA	NA	NA	NA	NA	NA	109.1	NA	NA	NA	NA	NA	NA	NA	NA	214.1	NA	F12F1.11|F12F1_11	0	0	0
AT1G12030	0	0	0	0	0	1	1	0	0	0	0	0	0	0	0	0	0	0	NA	NA	NA	NA	NA	114.7	53.1	NA	NA	NA	NA	NA	NA	NA	NA	NA	NA	NA	F12F1.10|F12F1_10	0	0	0
AT1G12040	0	0	1	1	1	1	0	1	0	0	0	0	0	0	0	0	0	0	NA	NA	157.4	164	103.6	108.2	NA	218.8	NA	NA	NA	NA	NA	NA	NA	NA	NA	NA	F12F1.9|F12F1_9|leucine-rich repeat/extensin 1	0	0	1
AT1G12050	0	0	0	0	0	0	0	1	0	0	0	0	0	0	0	0	0	0	NA	NA	NA	NA	NA	NA	NA	195.3	NA	NA	NA	NA	NA	NA	NA	NA	NA	NA	AtFAH|F12F1.8|F12F1_8|FAH|SSCD1|fumarylacetoacetate hydrolase|short-day sensitive cell deathshort-day sensitive cell deathshort-day sensitive cell death 111	0	0	0
AT1G12064	0	0	0	0	0	0	0	1	0	0	0	0	1	0	0	0	0	0	NA	NA	NA	NA	NA	NA	NA	252.3	NA	NA	NA	NA	45.6	NA	NA	NA	NA	NA	-	0	0	0
AT1G12080	0	0	1	0	0	0	0	0	0	0	0	0	0	0	0	0	0	0	NA	NA	116.5	NA	NA	NA	NA	NA	NA	NA	NA	NA	NA	NA	NA	NA	NA	NA	F12F1.4|F12F1_4	0	0	0
AT1G12100	0	0	0	0	0	1	0	1	0	0	0	0	0	0	0	0	1	0	NA	NA	NA	NA	NA	92.1	NA	82.7	NA	NA	NA	NA	NA	NA	NA	NA	217	NA	F12F1.2|F12F1_2	0	0	0
AT1G12110	1	0	1	1	1	1	1	0	1	0	1	1	0	0	0	0	1	1	228.7	NA	334.4	276.1	158.3	129.1	139.7	NA	112.4	NA	294.6	272.4	NA	NA	NA	NA	243.6	272.1	ARABIDOPSIS THALIANA NITRATE TRANSPORTER 1|ATNRT1|ATNRT1.1|AtNPF6.3|B-1|CHL1|CHL1-1|CHLORATE/NITRATE TRANSPORTER|CHLORINA 1|F12F1.1|F12F1_1|NITRATE TRANSPORTER 1|NITRATE/CHLORATE TRANSPORTER|NPF6.3|NRT1|NRT1/ PTR family 6.3|nitrate transporter 1.1	1	0	1
AT1G12120	0	0	0	0	0	1	0	1	0	0	0	0	0	0	0	0	1	1	NA	NA	NA	NA	NA	107.8	NA	95.4	NA	NA	NA	NA	NA	NA	NA	NA	159	127.2	T28K15.14|T28K15_14	0	0	0
AT1G12140	0	0	0	1	0	0	0	1	0	0	0	0	0	0	0	0	0	0	NA	NA	NA	95.7	NA	NA	NA	113.1	NA	NA	NA	NA	NA	NA	NA	NA	NA	NA	T28K15.12|T28K15_12|flavin-monooxygenase glucosinolate S-oxygenase 5	0	0	0
AT1G12160	0	0	1	0	0	0	1	1	0	0	0	0	0	0	0	0	0	0	NA	NA	78.2	NA	NA	NA	57.1	190.8	NA	NA	NA	NA	NA	NA	NA	NA	NA	NA	T28K15.10|T28K15_10	0	0	0
AT1G12190	0	1	0	0	0	0	0	1	0	0	0	0	0	0	0	0	0	0	NA	105.2	NA	NA	NA	NA	NA	105.2	NA	NA	NA	NA	NA	NA	NA	NA	NA	NA	T28K15.8|T28K15_8	0	0	0
AT1G12200	0	0	1	1	0	0	0	0	0	0	0	0	0	0	0	0	0	0	NA	NA	203.9	195.7	NA	NA	NA	NA	NA	NA	NA	NA	NA	NA	NA	NA	NA	NA	T28K15.7|T28K15_7|flavin monooxygenase	0	0	0
AT1G12210	0	0	1	1	0	0	0	0	0	0	0	0	0	0	0	0	0	0	NA	NA	168.6	142.3	NA	NA	NA	NA	NA	NA	NA	NA	NA	NA	NA	NA	NA	NA	RPS5-like 1|T28K15.6|T28K15_6	0	0	0
AT1G12230	0	0	0	0	0	0	0	1	0	0	0	0	0	0	0	0	0	0	NA	NA	NA	NA	NA	NA	NA	194.1	NA	NA	NA	NA	NA	NA	NA	NA	NA	NA	T28K15.4|T28K15_4	0	0	0
AT1G12240	0	0	1	1	0	0	1	1	0	0	0	0	1	0	0	0	0	1	NA	NA	168	176.3	NA	NA	80.7	132.1	NA	NA	NA	NA	61.1	NA	NA	NA	NA	100.4	AtFRUCT4|AtVI2|FRUCT4|T28K15.3|T28K15_3|VAC-INV|VACUOLAR INVERTASE|VI2|fructosidase 4|vacuolar invertase 2	0	0	1
AT1G12260	0	0	1	0	0	0	1	1	0	0	0	0	0	0	0	0	0	0	NA	NA	76.5	NA	NA	NA	45.2	403.1	NA	NA	NA	NA	NA	NA	NA	NA	NA	NA	ANAC007|EMB2749|EMBRYO DEFECTIVE 2749|NAC 007|T28K15.1|T28K15_1|VASCULAR RELATED NAC-DOMAIN PROTEIN 4|VND4	0	0	0
AT1G12270	0	0	0	0	0	0	0	1	0	0	0	0	0	0	0	0	0	0	NA	NA	NA	NA	NA	NA	NA	258	NA	NA	NA	NA	NA	NA	NA	NA	NA	NA	F5O11.2|F5O11_2	0	0	0
AT1G12290	0	0	1	0	0	0	0	0	0	0	0	0	0	0	0	0	0	0	NA	NA	70.4	NA	NA	NA	NA	NA	NA	NA	NA	NA	NA	NA	NA	NA	NA	NA	F5O11.3|F5O11_3	0	0	0
AT1G12294	0	1	1	1	0	1	1	1	0	0	0	0	0	0	0	0	0	1	NA	89.3	86.9	84.7	NA	96.5	70.8	252.5	NA	NA	NA	NA	NA	NA	NA	NA	NA	68.9	MIR472A|microRNA472A|p_MI0005102	0	0	0
AT1G12300	0	0	0	0	0	0	0	0	0	0	0	0	1	0	0	0	0	0	NA	NA	NA	NA	NA	NA	NA	NA	NA	NA	NA	NA	49	NA	NA	NA	NA	NA	F5O11.4|F5O11_4	0	0	0
AT1G12310	1	0	1	1	0	0	0	0	0	0	0	1	0	0	0	0	0	1	112.4	NA	325.4	288.5	NA	NA	NA	NA	NA	NA	NA	193.8	NA	NA	NA	NA	NA	248.8	F5O11.35|F5O11_35	0	0	0
AT1G12330	0	0	0	0	0	0	0	1	0	0	0	0	0	0	0	0	0	1	NA	NA	NA	NA	NA	NA	NA	332.2	NA	NA	NA	NA	NA	NA	NA	NA	NA	189.9	F5O11.6|F5O11_6	0	0	1
AT1G12340	0	0	1	1	0	0	1	0	0	0	0	0	0	0	0	0	0	0	NA	NA	204.3	203.5	NA	NA	64.9	NA	NA	NA	NA	NA	NA	NA	NA	NA	NA	NA	F5O11.7|F5O11_7	0	0	0
AT1G12360	0	0	0	0	0	0	0	1	0	0	0	0	0	0	0	0	0	0	NA	NA	NA	NA	NA	NA	NA	355.9	NA	NA	NA	NA	NA	NA	NA	NA	NA	NA	F5O11.8|F5O11_8|SEC11|keule	0	0	0
AT1G12370	0	0	1	1	0	0	1	0	0	0	0	0	0	0	0	0	0	0	NA	NA	88.5	88.5	NA	NA	55.1	NA	NA	NA	NA	NA	NA	NA	NA	NA	NA	NA	F5O11.9|F5O11_9|TYPE II CPD PHOTOLYASE|UV RESISTANCE 2|UVR2|photolyase 1	0	0	0
AT1G12380	0	0	1	1	1	1	1	1	1	0	1	1	1	0	0	0	0	1	NA	NA	113	122.7	76.4	99.3	80.7	97.7	83.5	NA	124.3	127.4	54.3	NA	NA	NA	NA	113.4	F5O11.10|F5O11_10	0	0	0
AT1G12390	0	0	0	0	0	0	0	1	0	0	0	0	0	0	0	0	0	0	NA	NA	NA	NA	NA	NA	NA	161.3	NA	NA	NA	NA	NA	NA	NA	NA	NA	NA	F5O11.11|F5O11_11	0	0	0
AT1G12410	0	0	0	0	0	0	0	1	0	0	0	0	0	0	0	0	0	0	NA	NA	NA	NA	NA	NA	NA	263.5	NA	NA	NA	NA	NA	NA	NA	NA	NA	NA	CLP protease proteolytic subunit 2|CLPR2|EMB3146|EMBRYO DEFECTIVE 3146|F5O11.13|F5O11_13|NCLPP2|NUCLEAR-ENCODED CLP PROTEASE P2	0	0	0
AT1G12420	1	1	1	1	1	1	1	0	0	0	1	1	0	0	1	0	0	1	162	354.7	536.1	562.4	380.7	285.4	188.9	NA	NA	NA	344.2	321.4	NA	NA	118.4	NA	NA	346.8	ACT domain repeat 8|F5O11.14|F5O11_14	0	0	0
AT1G12423	0	0	0	0	0	0	1	1	0	0	0	0	0	0	0	0	0	0	NA	NA	NA	NA	NA	NA	127.9	199.6	NA	NA	NA	NA	NA	NA	NA	NA	NA	NA	NoInfo	0	0	0
AT1G12430	0	0	0	0	0	0	0	1	0	0	0	0	0	0	0	0	1	1	NA	NA	NA	NA	NA	NA	NA	160.3	NA	NA	NA	NA	NA	NA	NA	NA	213.1	167.3	Arabidopsis thaliana KINESIN Ungrouped clade|AtKINUa|PAK|armadillo repeat kinesin 3|gene A|phosphatidic acid kinase	0	0	0
AT1G12440	0	0	1	1	1	1	1	0	0	0	1	1	0	0	0	0	0	0	NA	NA	243	231.1	131.6	145.8	186.9	NA	NA	NA	246.4	262.7	NA	NA	NA	NA	NA	NA	F5O11.17|F5O11_17	0	0	0
AT1G12451	0	0	0	0	0	0	0	1	0	0	0	0	0	0	0	0	0	0	NA	NA	NA	NA	NA	NA	NA	180.8	NA	NA	NA	NA	NA	NA	NA	NA	NA	NA	NoInfo	0	0	0
AT1G12460	1	0	0	0	0	0	0	1	0	0	1	1	0	0	0	0	1	1	120.2	NA	NA	NA	NA	NA	NA	226.8	NA	NA	269.5	262.2	NA	NA	NA	NA	299.1	256.4	F5O11.21|F5O11_21	0	0	0
AT1G12480	0	0	0	0	0	0	0	1	0	0	0	0	0	0	0	0	0	0	NA	NA	NA	NA	NA	NA	NA	203.8	NA	NA	NA	NA	NA	NA	NA	NA	NA	NA	CARBON DIOXIDE INSENSITIVE 3|CDI3|F5O11.23|F5O11_23|OZONE-SENSITIVE 1|RADICAL-INDUCED CELL DEATH 3|RCD3|SLAC1|SLOW ANION CHANNEL-ASSOCIATED 1	0	0	0
AT1G12500	0	0	1	1	1	1	1	0	0	0	0	0	0	0	0	0	0	1	NA	NA	347	274.6	160.9	124.9	135.7	NA	NA	NA	NA	NA	NA	NA	NA	NA	NA	215.6	F5O11.25|F5O11_25	0	0	1
AT1G12510	0	0	0	0	0	0	1	0	0	0	0	0	0	0	0	0	1	1	NA	NA	NA	NA	NA	NA	92.5	NA	NA	NA	NA	NA	NA	NA	NA	NA	189	217	60116.TRNA-VAL-1|61405.TRNA-VAL-1	0	0	0
AT1G12560	0	0	1	1	1	1	0	1	0	0	0	0	0	0	0	0	0	1	NA	NA	252.7	201.6	166.1	136.7	NA	394.6	NA	NA	NA	NA	NA	NA	NA	NA	NA	100.4	ATEXP7|ATEXPA7|ATHEXP ALPHA 1.26|EXP7|F5O11.30|F5O11_30|expansin A7	0	0	0
AT1G12580	1	1	1	1	1	1	1	0	1	1	1	1	1	1	1	1	0	1	458.9	206.8	588.7	561.2	234.5	224.8	320.7	NA	120.5	169.8	311.4	337.9	93.8	158.3	291.3	164.3	NA	362.6	F5O11.32|F5O11_32|phosphoenolpyruvate carboxylase-related kinase 1	0	0	0
AT1G12600	0	0	1	1	0	0	1	0	0	0	0	0	0	0	0	0	0	0	NA	NA	170.9	171	NA	NA	84.6	NA	NA	NA	NA	NA	NA	NA	NA	NA	NA	NA	F5O11.33|F5O11_33	0	0	0
AT1G12610	0	0	0	0	0	0	1	0	0	0	0	1	1	0	0	0	1	1	NA	NA	NA	NA	NA	NA	129.8	NA	NA	NA	NA	144.9	58.1	NA	NA	NA	204.4	198.8	DWARF AND DELAYED FLOWERING 1|T12C24.14|T12C24_14	0	0	0
AT1G12630	0	0	0	0	0	0	1	1	0	0	0	0	0	0	0	0	0	0	NA	NA	NA	NA	NA	NA	43.3	228.8	NA	NA	NA	NA	NA	NA	NA	NA	NA	NA	T12C24.16|T12C24_16	0	0	0
AT1G12640	0	1	1	1	1	1	1	1	0	0	1	1	0	0	0	0	0	1	NA	97	166.1	157.7	195.7	177.8	64.9	938.4	NA	NA	99.8	122.8	NA	NA	NA	NA	NA	159.4	AtLPLAT1|LPCAT1|T12C24.17|T12C24_17|lysophosphatidylcholine acyltransferase 1|lysophospholipid acyltransferase 1	0	0	0
AT1G12663	0	0	0	0	0	0	1	0	0	0	0	0	0	0	0	0	0	0	NA	NA	NA	NA	NA	NA	45.2	NA	NA	NA	NA	NA	NA	NA	NA	NA	NA	NA	-	0	0	0
AT1G12665	0	0	0	0	0	0	0	1	0	0	0	0	0	0	0	0	0	0	NA	NA	NA	NA	NA	NA	NA	158.6	NA	NA	NA	NA	NA	NA	NA	NA	NA	NA	-	0	0	0
AT1G12680	0	0	0	1	0	0	0	1	0	0	0	0	0	0	0	0	0	0	NA	NA	NA	97.3	NA	NA	NA	132.1	NA	NA	NA	NA	NA	NA	NA	NA	NA	NA	T12C24.32|T12C24_32|phosphoenolpyruvate carboxylase-related kinase 2	0	0	0
AT1G12710	0	1	1	1	1	1	0	1	0	0	1	0	0	0	1	0	0	1	NA	131.6	263.6	225.5	194.3	86.5	NA	90.2	NA	NA	151.7	NA	NA	NA	107.1	NA	NA	203.2	AtPP2-A12|T12C24.23|T12C24_23|phloem protein 2-A12	0	0	1
AT1G12720	0	0	0	0	0	0	0	0	0	0	0	0	1	0	0	0	0	0	NA	NA	NA	NA	NA	NA	NA	NA	NA	NA	NA	NA	61.1	NA	NA	NA	NA	NA	T12C24.24|T12C24_24	0	0	0
AT1G12740	0	0	1	1	1	0	1	1	0	0	0	0	1	0	0	0	0	1	NA	NA	158.6	156.4	113.3	NA	84.6	204.3	NA	NA	NA	NA	67.2	NA	NA	NA	NA	115.8	''cytochrome P450|T12C24.27|T12C24_27|cytochrome P450|family 87|polypeptide 2|polypeptide 2''|subfamily A	0	0	1
AT1G12750	0	0	0	0	1	1	1	1	0	0	0	0	0	0	0	0	0	0	NA	NA	NA	NA	177.8	120.8	68.9	183.3	NA	NA	NA	NA	NA	NA	NA	NA	NA	NA	ATRBL6|RHOMBOID-like protein 6|T12C24.28|T12C24_28	0	0	0
AT1G12760	0	1	1	1	0	0	0	1	0	0	1	0	0	0	0	0	1	1	NA	154.2	253.4	269	NA	NA	NA	129.1	NA	NA	171.3	NA	NA	NA	NA	NA	566.4	260.8	T12C24.29|T12C24_29	0	0	0
AT1G12770	0	0	0	0	0	0	0	1	0	0	0	0	0	0	0	0	0	0	NA	NA	NA	NA	NA	NA	NA	115.1	NA	NA	NA	NA	NA	NA	NA	NA	NA	NA	INCREASED SIZE EXCLUSION LIMIT 1|ISE1|embryo defective 1586	0	0	0
AT1G12775	0	0	0	0	0	0	0	1	0	0	0	0	0	0	0	0	0	0	NA	NA	NA	NA	NA	NA	NA	149.1	NA	NA	NA	NA	NA	NA	NA	NA	NA	NA	-	0	0	0
AT1G12780	0	0	1	1	0	0	1	0	0	0	1	0	0	0	0	0	0	1	NA	NA	85.8	88.4	NA	NA	98.4	NA	NA	NA	120.3	NA	NA	NA	NA	NA	NA	100.4	A. THALIANA UDP-GLC 4-EPIMERASE 1|ATUGE1|F13K23.3|F13K23_3|UDP-D-glucose/UDP-D-galactose 4-epimerase 1	0	0	1
AT1G12790	0	0	0	0	0	0	0	1	0	0	0	0	0	0	0	0	0	0	NA	NA	NA	NA	NA	NA	NA	113.1	NA	NA	NA	NA	NA	NA	NA	NA	NA	NA	F13K23.4|F13K23_4	0	0	0
AT1G12810	0	0	0	0	0	0	0	1	0	0	0	0	0	0	0	0	0	0	NA	NA	NA	NA	NA	NA	NA	107.6	NA	NA	NA	NA	NA	NA	NA	NA	NA	NA	F13K23.6|F13K23_6	0	0	0
AT1G12820	0	1	1	1	1	1	1	1	0	0	1	0	0	0	0	0	0	1	NA	189.5	201.3	155.6	167.6	187.2	82.6	113.6	NA	NA	157	NA	NA	NA	NA	NA	NA	145.7	F13K23.7|F13K23_7|auxin signaling F-box 3	1	0	0
AT1G12830	0	1	0	0	0	0	0	0	0	0	1	1	0	0	0	0	1	1	NA	144	NA	NA	NA	NA	NA	NA	NA	NA	161.8	174.3	NA	NA	NA	NA	198.1	121.3	F13K23.8|F13K23_8	0	0	0
AT1G12845	0	0	0	0	1	1	0	1	0	0	0	0	0	0	0	0	0	1	NA	NA	NA	NA	90.6	107	NA	172.1	NA	NA	NA	NA	NA	NA	NA	NA	NA	124.1	-	0	0	0
AT1G12860	0	1	0	1	0	0	0	0	0	0	1	1	0	0	0	0	1	1	NA	130.2	NA	61	NA	NA	NA	NA	NA	NA	146.3	151.5	NA	NA	NA	NA	481.8	101.1	F13K23.12|F13K23_12|ICE2|INDUCER OF CBF EXPRESSION 2|SCREAM 2	0	0	0
AT1G12890	0	0	0	0	1	0	0	1	0	0	0	0	0	0	0	0	0	0	NA	NA	NA	NA	95.5	NA	NA	540.7	NA	NA	NA	NA	NA	NA	NA	NA	NA	NA	F13K23.25	0	0	0
AT1G12900	0	0	0	0	1	1	0	0	0	0	0	0	0	0	0	0	1	0	NA	NA	NA	NA	124.2	136.9	NA	NA	NA	NA	NA	NA	NA	NA	NA	NA	298.7	NA	F13K23.15|F13K23_15|glyceraldehyde 3-phosphate dehydrogenase A subunit 2	0	0	0
AT1G12920	0	1	0	0	0	0	0	1	0	0	0	0	0	0	0	0	0	0	NA	106.9	NA	NA	NA	NA	NA	102.9	NA	NA	NA	NA	NA	NA	NA	NA	NA	NA	F13K23.17|F13K23_17|eukaryotic release factor 1-2	0	0	0
AT1G12938	0	1	1	1	1	0	0	1	0	0	0	0	0	0	0	0	0	1	NA	122.1	190.4	162.7	105.1	NA	NA	56.9	NA	NA	NA	NA	NA	NA	NA	NA	NA	104.9	NoInfo	0	0	0
AT1G12950	1	1	1	1	1	1	1	0	0	0	1	1	0	0	0	0	0	1	93.8	142.6	444.9	417.1	194.7	115.8	147.5	NA	NA	NA	182.3	169	NA	NA	NA	NA	NA	211.1	F13K23.21|F13K23_21|RELA/SPOT homolog 2|RHS3|ROOT HAIR SPECIFIC 3|root hair specific 2	0	0	0
AT1G12990	0	1	1	1	1	1	1	1	0	0	1	1	0	0	0	0	0	1	NA	191.3	344.6	347.8	189.4	178.9	88.5	630.7	NA	NA	187.4	167.8	NA	NA	NA	NA	NA	249.5	F3F19.2|F3F19_2	0	0	0
AT1G13000	0	0	0	0	0	0	0	1	0	0	0	0	0	0	0	0	0	0	NA	NA	NA	NA	NA	NA	NA	217.8	NA	NA	NA	NA	NA	NA	NA	NA	NA	NA	F3F19.3|F3F19_3	0	0	0
AT1G13020	0	0	1	1	0	0	1	1	0	0	0	0	0	0	0	0	0	0	NA	NA	110.1	93.8	NA	NA	63	188.3	NA	NA	NA	NA	NA	NA	NA	NA	NA	NA	F3F19.4|F3F19_4|eukaryotic initiation factor 4B2	0	0	0
AT1G13070	0	0	0	0	0	0	0	1	0	0	0	0	0	0	0	0	0	0	NA	NA	NA	NA	NA	NA	NA	170.8	NA	NA	NA	NA	NA	NA	NA	NA	NA	NA	''cytochrome P450|F3F19.9|F3F19_9|cytochrome P450|family 71|polypeptide 27|polypeptide 27''|subfamily B	0	0	0
AT1G13080	0	1	1	1	1	1	0	0	0	0	1	1	1	0	0	0	0	1	NA	244.6	353.6	294.8	205.6	123.9	NA	NA	NA	NA	204.1	139.4	60.8	NA	NA	NA	NA	261.2	''cytochrome P450|CYTOCHROME P450 MONOOXYGENASE 71B2|F3F19.10|F3F19_10|cytochrome P450|family 71|polypeptide 2|polypeptide 2''|subfamily B	0	0	1
AT1G13110	0	0	1	1	0	0	1	1	0	0	1	1	0	0	0	0	0	1	NA	NA	344.1	309.2	NA	NA	78.7	180.6	NA	NA	155.9	130.7	NA	NA	NA	NA	NA	225.5	''cytochrome P450|F3F19.13|F3F19_13|cytochrome P450|family 71 subfamily B|polypeptide 7|polypeptide 7''	0	0	1
AT1G13120	0	0	0	0	0	0	0	1	0	0	0	0	0	0	0	0	0	0	NA	NA	NA	NA	NA	NA	NA	154.1	NA	NA	NA	NA	NA	NA	NA	NA	NA	NA	A. thaliana homolog of yeast GLE1|AtGLE1|F3F19.14|F3F19_14|embryo defective 1745	0	0	0
AT1G13130	0	0	0	0	0	0	0	1	0	0	0	0	0	0	0	0	0	0	NA	NA	NA	NA	NA	NA	NA	126.4	NA	NA	NA	NA	NA	NA	NA	NA	NA	NA	F3F19.15|F3F19_15	0	0	0
AT1G13140	0	0	0	0	0	0	1	1	0	0	1	1	0	0	0	0	0	0	NA	NA	NA	NA	NA	NA	55.1	134.6	NA	NA	122.4	128.3	NA	NA	NA	NA	NA	NA	''cytochrome P450|F3F19.16|F3F19_16|cytochrome P450|family 86|polypeptide 3|polypeptide 3''|subfamily C	0	0	0
AT1G13145	0	1	0	0	0	0	0	0	0	0	0	0	0	0	0	0	0	0	NA	77.3	NA	NA	NA	NA	NA	NA	NA	NA	NA	NA	NA	NA	NA	NA	NA	NA	-	0	0	0
AT1G13160	0	0	0	0	0	0	0	1	0	0	0	0	0	0	0	0	0	0	NA	NA	NA	NA	NA	NA	NA	225.8	NA	NA	NA	NA	NA	NA	NA	NA	NA	NA	F3F19.18|F3F19_18	0	0	0
AT1G13170	0	0	0	0	0	0	0	1	0	0	0	0	0	0	0	0	0	0	NA	NA	NA	NA	NA	NA	NA	990.8	NA	NA	NA	NA	NA	NA	NA	NA	NA	NA	F3F19.19|F3F19_19|OSBP(oxysterol binding protein)-related protein 1D	0	0	0
AT1G13180	0	0	0	0	0	0	0	1	0	0	0	0	0	0	0	0	0	0	NA	NA	NA	NA	NA	NA	NA	120.6	NA	NA	NA	NA	NA	NA	NA	NA	NA	NA	ACTIN-RELATED PROTEIN 3|ARABIDOPSIS THALIANA ACTIN-RELATED PROTEIN 3|ARP3|ATARP3|DISTORTED TRICHOMES 1|F3F19.20|F3F19_20	0	0	0
AT1G13190	0	0	0	0	0	0	1	0	0	0	0	0	0	0	0	0	0	0	NA	NA	NA	NA	NA	NA	64.9	NA	NA	NA	NA	NA	NA	NA	NA	NA	NA	NA	F3F19.21|F3F19_21	0	0	0
AT1G13195	0	0	1	1	0	0	0	1	0	0	1	1	0	0	0	0	0	1	NA	NA	165.6	132.7	NA	NA	NA	127.6	NA	NA	100.4	111	NA	NA	NA	NA	NA	97.3	-	0	0	1
AT1G13210	0	0	0	0	0	0	1	1	0	0	0	0	0	0	0	0	0	0	NA	NA	NA	NA	NA	NA	78.7	787.3	NA	NA	NA	NA	NA	NA	NA	NA	NA	NA	F3F19.24|F3F19_24|autoinhibited Ca2+/ATPase II	0	0	0
AT1G13220	0	0	1	1	1	0	1	0	0	0	0	0	0	0	0	0	0	1	NA	NA	526.8	464.9	149.7	NA	86.6	NA	NA	NA	NA	NA	NA	NA	NA	NA	NA	189.5	CROWDED NUCLEI 2|CRWN2|F3F19.25|F3F19_25|LITTLE NUCLEI2	0	0	0
AT1G13240	1	0	0	0	0	0	1	1	0	0	0	1	1	1	1	0	0	0	389.9	NA	NA	NA	NA	NA	515.4	157.6	NA	NA	NA	323.4	104.1	324	249.2	NA	NA	NA	51346.TRNA-ILE-1	0	0	0
AT1G13245	1	0	1	1	0	0	1	0	0	0	0	0	1	1	0	0	0	0	303.9	NA	603	502.3	NA	NA	291.2	NA	NA	NA	NA	NA	93	329	NA	NA	NA	NA	DEVIL 4|DVL4|ROTUNDIFOLIA like 17	0	0	0
AT1G13250	0	0	0	0	0	0	1	1	0	0	0	0	0	0	0	0	0	0	NA	NA	NA	NA	NA	NA	149.5	206.6	NA	NA	NA	NA	NA	NA	NA	NA	NA	NA	T6J4.1|T6J4_1|galacturonosyltransferase-like 3	0	0	1
AT1G13260	0	0	0	0	0	1	0	1	0	0	0	0	0	0	0	0	1	1	NA	NA	NA	NA	NA	183.7	NA	405.9	NA	NA	NA	NA	NA	NA	NA	NA	225.7	362.6	AtRAV1|EDF4|ETHYLENE RESPONSE DNA BINDING FACTOR 4|T6J4.2|T6J4_2|related to ABI3/VP1 1	0	0	1
AT1G13280	0	1	1	1	0	0	1	0	0	0	0	0	0	0	0	0	0	0	NA	120.3	89	81.9	NA	NA	129.8	NA	NA	NA	NA	NA	NA	NA	NA	NA	NA	NA	T6J4.4|T6J4_4|allene oxide cyclase 4	0	0	1
AT1G13290	0	0	0	0	0	0	0	1	0	0	0	0	0	0	0	0	0	0	NA	NA	NA	NA	NA	NA	NA	159.8	NA	NA	NA	NA	NA	NA	NA	NA	NA	NA	DEFECTIVELY ORGANIZED TRIBUTARIES 5|T6J4.5|T6J4_5|WIP domain protein 6|WIP6	0	0	0
AT1G13300	0	0	1	0	0	0	0	0	0	0	0	0	0	0	0	0	0	0	NA	NA	232.6	NA	NA	NA	NA	NA	NA	NA	NA	NA	NA	NA	NA	NA	NA	NA	HYPERSENSITIVITY TO LOW PI-ELICITED PRIMARY ROOT SHORTENING 1|HYPERSENSITIVITY TO LOW PI-ELICITED PRIMARY ROOT SHORTENING 1|T6J4.6|T6J4_6	0	0	1
AT1G13310	0	0	1	0	0	0	0	1	0	0	0	0	0	0	0	0	0	1	NA	NA	213.4	NA	NA	NA	NA	270	NA	NA	NA	NA	NA	NA	NA	NA	NA	97.3	T6J4.7|T6J4_7	0	0	0
AT1G13360	0	1	1	1	1	1	1	0	1	0	1	1	0	0	0	0	0	0	NA	241	208.6	244	129.7	125.6	155.4	NA	104.8	NA	280.4	266.1	NA	NA	NA	NA	NA	NA	-	0	0	0
AT1G13380	1	0	1	1	1	1	1	1	0	0	1	1	1	1	1	0	0	1	183.7	NA	340.3	337	209.7	218.3	123.9	115.1	NA	NA	237.1	232.1	83.6	108.4	131.3	NA	NA	228.9	T6J4.13|T6J4_13	0	0	0
AT1G13400	0	0	0	0	0	0	0	0	0	0	0	0	0	0	0	0	0	1	NA	NA	NA	NA	NA	NA	NA	NA	NA	NA	NA	NA	NA	NA	NA	NA	NA	80.2	JAGGED-LIKE|JGL|NUBBIN|T6J4.23|T6J4_23	0	0	0
AT1G13430	1	0	0	0	0	1	1	1	0	0	0	0	0	0	0	0	0	0	204.7	NA	NA	NA	NA	97.8	84.6	132.1	NA	NA	NA	NA	NA	NA	NA	NA	NA	NA	ARABIDOPSIS THALIANA SULFOTRANSFERASE 4C|ATST4C|T6J4.24|T6J4_24|sulfotransferase 4C	0	0	0
AT1G13448	0	0	1	1	0	0	0	1	0	0	1	1	0	0	0	0	0	0	NA	NA	115.7	125	NA	NA	NA	200.6	NA	NA	151.4	162.8	NA	NA	NA	NA	NA	NA	-	0	0	0
AT1G13460	0	0	0	0	0	0	0	1	0	0	0	0	0	0	0	0	1	0	NA	NA	NA	NA	NA	NA	NA	122.1	NA	NA	NA	NA	NA	NA	NA	NA	131	NA	T6J4.19|T6J4_19	0	0	0
AT1G13470	0	1	1	1	0	0	1	0	0	0	0	0	0	0	0	0	1	1	NA	114	96.1	109.1	NA	NA	76.7	NA	NA	NA	NA	NA	NA	NA	NA	NA	197.7	90.1	T6J4.20|T6J4_20	0	0	0
AT1G13490	0	0	0	0	0	0	0	1	0	0	0	0	0	0	0	0	0	0	NA	NA	NA	NA	NA	NA	NA	158.8	NA	NA	NA	NA	NA	NA	NA	NA	NA	NA	F13B4.1|F13B4_1	0	0	0
AT1G13510	0	0	1	1	0	0	0	0	0	0	0	0	0	0	0	0	0	0	NA	NA	183	191.2	NA	NA	NA	NA	NA	NA	NA	NA	NA	NA	NA	NA	NA	NA	F13B4.15|F13B4_15	0	0	0
AT1G13530	0	0	0	0	0	0	0	1	0	0	0	0	0	0	0	0	0	0	NA	NA	NA	NA	NA	NA	NA	102.4	NA	NA	NA	NA	NA	NA	NA	NA	NA	NA	F13B4.17|F13B4_17	0	0	0
AT1G13540	0	0	0	0	0	0	0	0	0	0	0	0	1	0	0	0	0	0	NA	NA	NA	NA	NA	NA	NA	NA	NA	NA	NA	NA	55.1	NA	NA	NA	NA	NA	F13B4.29|F13B4_29	0	0	0
AT1G13550	0	0	1	1	0	0	0	0	0	0	0	0	0	0	0	0	0	1	NA	NA	126.7	106.1	NA	NA	NA	NA	NA	NA	NA	NA	NA	NA	NA	NA	NA	79.9	F13B4.4|F13B4_4	0	0	0
AT1G13560	0	0	1	0	0	0	0	1	0	0	0	0	0	0	0	0	0	0	NA	NA	104.4	NA	NA	NA	NA	145.6	NA	NA	NA	NA	NA	NA	NA	NA	NA	NA	AMINOALCOHOLPHOSPHOTRANSFERASE|ATAAPT1|F13B4.5|F13B4_5|aminoalcoholphosphotransferase 1	0	0	0
AT1G13590	0	1	1	1	1	1	1	0	0	0	0	0	0	0	0	0	0	1	NA	145	381.9	354.2	223.5	168.4	47.2	NA	NA	NA	NA	NA	NA	NA	NA	NA	NA	127.8	ATPSK1|F21F23.2|phytosulfokine 1 precursor	0	0	1
AT1G13600	0	0	0	0	0	0	0	1	0	0	0	0	1	0	0	0	0	0	NA	NA	NA	NA	NA	NA	NA	335.7	NA	NA	NA	NA	52	NA	NA	NA	NA	NA	AtbZIP58|F21F23.3|basic leucine-zipper 58	0	0	0
AT1G13605	0	1	1	1	1	1	1	1	0	0	1	1	1	0	0	0	0	1	NA	139.4	271.6	266.6	115.9	103.6	53.1	244.5	NA	NA	136.7	125	61.1	NA	NA	NA	NA	183.4	-	0	0	0
AT1G13608	0	0	0	0	0	0	0	1	0	0	0	0	0	0	0	0	0	0	NA	NA	NA	NA	NA	NA	NA	139.6	NA	NA	NA	NA	NA	NA	NA	NA	NA	NA	-	0	0	0
AT1G13609	0	0	0	0	0	0	0	1	0	0	0	0	0	0	0	0	0	0	NA	NA	NA	NA	NA	NA	NA	114.9	NA	NA	NA	NA	NA	NA	NA	NA	NA	NA	-	0	0	0
AT1G13620	0	0	0	0	0	0	0	1	0	0	0	0	0	0	0	0	0	0	NA	NA	NA	NA	NA	NA	NA	458.6	NA	NA	NA	NA	NA	NA	NA	NA	NA	NA	F21F23.5|GLV5|GOLVEN 5|root meristem growth factor 2	0	0	0
AT1G13635	0	0	1	1	0	0	0	1	0	0	0	0	0	0	0	0	0	1	NA	NA	208.7	214.4	NA	NA	NA	100.7	NA	NA	NA	NA	NA	NA	NA	NA	NA	157.3	-	0	0	0
AT1G13640	0	0	0	0	0	0	1	1	0	0	0	0	0	0	0	0	0	0	NA	NA	NA	NA	NA	NA	61	104.4	NA	NA	NA	NA	NA	NA	NA	NA	NA	NA	F21F23.8|F21F23_8	0	0	1
AT1G13670	0	0	0	0	0	0	1	1	0	0	0	1	1	0	0	0	0	0	NA	NA	NA	NA	NA	NA	37.4	130.6	NA	NA	NA	84.6	47.5	NA	NA	NA	NA	NA	F21F23.11|F21F23_11	0	0	0
AT1G13690	0	0	0	0	0	0	0	0	0	0	0	0	0	1	0	0	0	0	NA	NA	NA	NA	NA	NA	NA	NA	NA	NA	NA	NA	NA	86.2	NA	NA	NA	NA	ATPase E1|F21F23.13|F21F23_13|GRPE HOMOLOG	0	0	0
AT1G13700	0	1	1	1	1	1	1	0	0	0	0	0	0	0	0	0	0	1	NA	116.5	228.1	225.7	117.4	101.3	78.7	NA	NA	NA	NA	NA	NA	NA	NA	NA	NA	165.9	6-phosphogluconolactonase 1|F21F23.14|F21F23_14	0	0	0
AT1G13710	0	0	0	0	0	0	0	1	1	0	0	0	0	0	0	0	0	0	NA	NA	NA	NA	NA	NA	NA	231.8	58.2	NA	NA	NA	NA	NA	NA	NA	NA	NA	''cytochrome P450|F21F23.15|F21F23_15|KLU|KLUH|cytochrome P450|family 78|polypeptide 5|polypeptide 5''|subfamily A	0	0	1
AT1G13740	0	1	1	1	1	1	1	0	0	0	1	1	1	0	0	0	0	1	NA	134.8	258.9	299.3	129.8	144.6	112.1	NA	NA	NA	163.2	166.6	67.2	NA	NA	NA	NA	200.8	ABI five binding protein 2|F21F23.17|F21F23_17	0	0	0
AT1G13750	0	0	0	0	0	0	0	1	0	0	0	0	0	0	0	0	0	0	NA	NA	NA	NA	NA	NA	NA	116.1	NA	NA	NA	NA	NA	NA	NA	NA	NA	NA	F21F23.18|F21F23_18	0	0	0
AT1G13790	0	0	0	0	0	0	0	1	0	0	0	0	0	0	0	0	0	0	NA	NA	NA	NA	NA	NA	NA	581.5	NA	NA	NA	NA	NA	NA	NA	NA	NA	NA	F16A14.2|F16A14_2|factor of DNA methylation 4	0	0	0
AT1G13800	0	1	0	0	0	0	0	0	0	0	0	0	0	0	0	0	0	0	NA	74.1	NA	NA	NA	NA	NA	NA	NA	NA	NA	NA	NA	NA	NA	NA	NA	NA	F16A14.3|F16A14_3|embryonic factor 19	0	0	0
AT1G13820	0	0	0	0	0	0	0	1	0	0	0	0	0	0	0	0	0	0	NA	NA	NA	NA	NA	NA	NA	255.8	NA	NA	NA	NA	NA	NA	NA	NA	NA	NA	F16A14.4|F16A14_4	0	0	0
AT1G13830	0	0	1	1	0	0	0	0	0	0	0	0	0	0	0	0	0	0	NA	NA	168	174	NA	NA	NA	NA	NA	NA	NA	NA	NA	NA	NA	NA	NA	NA	F16A14.5|F16A14_5	0	0	0
AT1G13860	0	0	1	1	0	0	0	1	0	0	1	0	0	0	0	0	0	1	NA	NA	151.5	134.6	NA	NA	NA	111.9	NA	NA	122.6	NA	NA	NA	NA	NA	NA	126.5	F16A14.7|F16A14_7|QUASIMODO2 LIKE 1	0	0	0
AT1G13880	0	1	1	1	0	0	1	0	0	0	0	1	0	0	0	0	0	0	NA	132.3	91.9	92	NA	NA	78.7	NA	NA	NA	NA	110.4	NA	NA	NA	NA	NA	NA	ELM2|F16A14.9|F16A14_9	0	0	0
AT1G13900	0	0	0	0	0	0	0	1	0	0	0	0	0	0	0	0	0	0	NA	NA	NA	NA	NA	NA	NA	227	NA	NA	NA	NA	NA	NA	NA	NA	NA	NA	F16A14.11|F16A14_11|purple acid phosphatase 2	0	0	1
AT1G13930	0	1	1	1	0	0	0	1	1	1	1	1	0	0	0	0	0	1	NA	152.8	258.3	299.7	NA	NA	NA	222.3	136.9	183.9	403.3	402.1	NA	NA	NA	NA	NA	442.1	F16A14.14	0	0	1
AT1G13940	0	0	0	0	0	0	0	1	0	0	0	0	0	0	0	0	1	0	NA	NA	NA	NA	NA	NA	NA	110.9	NA	NA	NA	NA	NA	NA	NA	NA	309.8	NA	F16A14.15	0	0	0
AT1G13950	0	1	1	1	0	1	1	1	0	0	1	0	0	0	0	0	0	1	NA	190.2	211.4	217.6	NA	155.3	153.5	156.9	NA	NA	215.9	NA	NA	NA	NA	NA	NA	260.1	ATELF5A-1|EIF-5A|EIF5A|EUKARYOTIC ELONGATION FACTOR 5A|EUKARYOTIC ELONGATION FACTOR 5A-1|F16A14.17|eukaryotic elongation factor 5A-1	0	0	0
AT1G13960	0	0	1	1	1	1	0	1	0	0	0	0	1	0	0	0	0	0	NA	NA	234.5	222.1	153.1	177.6	NA	121.1	NA	NA	NA	NA	61.1	NA	NA	NA	NA	NA	F16A14.18|WRKY DNA-binding protein 4	0	0	0
AT1G13970	0	0	1	1	0	0	0	1	0	0	0	0	0	0	0	0	0	0	NA	NA	115.3	132.4	NA	NA	NA	196.8	NA	NA	NA	NA	NA	NA	NA	NA	NA	NA	F16A14.19	0	0	0
AT1G13980	1	0	1	1	0	0	1	1	0	0	1	1	0	0	0	0	0	0	114.7	NA	111.2	116.9	NA	NA	70.8	276	NA	NA	139.2	134.5	NA	NA	NA	NA	NA	NA	EMB30|EMBRYO DEFECTIVE 30|F16A14.20|GNOM|VAN7|VASCULAR NETWORK 7	1	0	0
AT1G13990	0	0	0	1	0	0	0	0	0	0	0	1	0	0	0	0	0	0	NA	NA	NA	93.7	NA	NA	NA	NA	NA	NA	NA	100.8	NA	NA	NA	NA	NA	NA	F7A19.8|F7A19_8	0	0	1
AT1G14000	0	1	1	0	0	0	0	0	0	0	0	0	0	0	0	0	0	0	NA	123.5	118.6	NA	NA	NA	NA	NA	NA	NA	NA	NA	NA	NA	NA	NA	NA	NA	F7A19.9|F7A19_9|VH1-interacting kinase	1	0	0
AT1G14020	0	0	1	1	0	0	0	0	0	0	0	0	0	0	0	0	0	1	NA	NA	193.9	147.5	NA	NA	NA	NA	NA	NA	NA	NA	NA	NA	NA	NA	NA	113.1	F7A19.11|F7A19_11	0	0	0
AT1G14030	0	0	1	1	0	0	0	0	0	0	0	0	0	0	0	0	0	0	NA	NA	170	154.2	NA	NA	NA	NA	NA	NA	NA	NA	NA	NA	NA	NA	NA	NA	F7A19.12|F7A19_12|lysine methyltransferase (LSMT)-like	0	0	0
AT1G14040	0	0	1	1	0	0	0	1	0	0	0	0	0	0	0	0	0	0	NA	NA	162.2	132	NA	NA	NA	133.1	NA	NA	NA	NA	NA	NA	NA	NA	NA	NA	F7A19.13|F7A19_13|PHO1 homolog 3|PHO1;H3	0	0	0
AT1G14060	0	0	0	0	1	0	0	0	0	0	0	0	0	0	0	0	0	1	NA	NA	NA	NA	109.7	NA	NA	NA	NA	NA	NA	NA	NA	NA	NA	NA	NA	118.6	-	0	0	0
AT1G14070	0	0	1	1	0	0	0	0	0	0	1	1	0	0	0	0	0	0	NA	NA	322.7	319.4	NA	NA	NA	NA	NA	NA	104.9	92.2	NA	NA	NA	NA	NA	NA	NoInfo	0	0	0
AT1G14071	0	0	0	0	0	0	0	1	0	0	0	0	0	0	0	0	0	0	NA	NA	NA	NA	NA	NA	NA	111.4	NA	NA	NA	NA	NA	NA	NA	NA	NA	NA	MIR830A|microRNA830A|p_MI0005386	0	0	0
AT1G14080	0	0	1	1	0	0	0	0	0	0	0	0	0	0	0	0	0	0	NA	NA	138.1	143.1	NA	NA	NA	NA	NA	NA	NA	NA	NA	NA	NA	NA	NA	NA	ATFUT6|F7A19.16|F7A19_16|fucosyltransferase 6	0	0	0
AT1G14090	0	1	1	1	0	0	0	0	0	0	1	1	0	0	0	0	0	1	NA	78.7	149.9	135.6	NA	NA	NA	NA	NA	NA	104	93.8	NA	NA	NA	NA	NA	93.2	F7A19.17|F7A19_17	0	0	0
AT1G14120	1	1	1	1	1	0	1	0	0	0	0	0	0	0	0	0	0	1	102.3	113.6	153.3	187.8	87.5	NA	51.2	NA	NA	NA	NA	NA	NA	NA	NA	NA	NA	139.8	F7A19.20|F7A19_20	1	0	0
AT1G14150	0	0	0	0	0	0	0	1	0	0	0	0	0	0	0	0	0	0	NA	NA	NA	NA	NA	NA	NA	78.2	NA	NA	NA	NA	NA	NA	NA	NA	NA	NA	F7A19.23|F7A19_23|PQL1|PQL2|Photosynthetic NDH subcomplex L 2|PsbQ-like 1|PsbQ-like 2	0	0	0
AT1G14160	0	0	0	0	0	0	1	1	0	0	0	0	0	0	0	0	0	0	NA	NA	NA	NA	NA	NA	74.8	106.4	NA	NA	NA	NA	NA	NA	NA	NA	NA	NA	CASP-like protein 1A1|CASPL1A1|F7A19.24|F7A19_24	0	0	0
AT1G14185	1	0	1	1	1	1	1	1	0	0	1	1	0	0	0	0	0	1	179.9	NA	238.1	245.9	168.6	122.6	68.9	405.9	NA	NA	161.8	135.6	NA	NA	NA	NA	NA	175.1	-	0	0	0
AT1G14190	0	0	0	0	0	0	0	1	0	0	0	0	0	0	0	0	0	0	NA	NA	NA	NA	NA	NA	NA	235.3	NA	NA	NA	NA	NA	NA	NA	NA	NA	NA	F7A19.28|F7A19_28	0	0	0
AT1G14205	0	0	1	0	0	0	0	0	0	0	0	0	0	0	0	0	0	0	NA	NA	92.2	NA	NA	NA	NA	NA	NA	NA	NA	NA	NA	NA	NA	NA	NA	NA	-	0	0	0
AT1G14230	0	1	0	0	0	0	0	0	0	0	0	0	0	0	0	0	0	0	NA	105.2	NA	NA	NA	NA	NA	NA	NA	NA	NA	NA	NA	NA	NA	NA	NA	NA	7A19.33|7A19_33|F7A19.33|F7A19_33	0	0	0
AT1G14240	0	0	0	0	0	1	0	1	0	0	0	0	0	0	0	0	0	0	NA	NA	NA	NA	NA	82.7	NA	63.9	NA	NA	NA	NA	NA	NA	NA	NA	NA	NA	F7A19.34|F7A19_34	0	0	0
AT1G14260	0	0	1	1	0	0	0	0	0	0	0	0	0	0	0	0	0	0	NA	NA	101	92.8	NA	NA	NA	NA	NA	NA	NA	NA	NA	NA	NA	NA	NA	NA	F14L17.2|F14L17_2	0	0	0
AT1G14270	0	1	0	1	1	1	0	0	0	0	0	0	0	0	0	0	0	0	NA	142.9	NA	197.3	128	134.3	NA	NA	NA	NA	NA	NA	NA	NA	NA	NA	NA	NA	F14L17.3|F14L17_3	0	0	0
AT1G14280	0	0	1	0	0	0	1	1	1	1	1	1	0	1	1	0	0	1	NA	NA	222.6	NA	NA	NA	131.8	132.1	151.8	258	348.1	301.2	NA	120.3	122.3	NA	NA	344.8	F14L17.4|F14L17_4|phytochrome kinase substrate 2	0	0	0
AT1G14290	1	0	0	0	0	0	0	0	0	0	0	0	0	0	0	0	0	0	217.1	NA	NA	NA	NA	NA	NA	NA	NA	NA	NA	NA	NA	NA	NA	NA	NA	NA	AtSBH2|F14L17.5|F14L17_5|sphingoid base hydroxylase 2	0	0	1
AT1G14310	0	0	0	0	0	0	0	1	0	0	0	0	0	0	0	0	0	0	NA	NA	NA	NA	NA	NA	NA	138.6	NA	NA	NA	NA	NA	NA	NA	NA	NA	NA	F14L17.7|F14L17_7	0	0	0
AT1G14320	0	0	0	0	0	0	1	0	0	0	0	0	0	0	0	0	0	0	NA	NA	NA	NA	NA	NA	94.4	NA	NA	NA	NA	NA	NA	NA	NA	NA	NA	NA	F14L17.9|F14L17_9|RPL10|RPL10A|SUPPRESSOR OF ACAULIS 52|ribosomal protein L10|ribosomal protein L10 A	0	0	0
AT1G14330	0	0	0	0	0	0	1	0	0	0	0	0	0	0	0	0	0	0	NA	NA	NA	NA	NA	NA	80.7	NA	NA	NA	NA	NA	NA	NA	NA	NA	NA	NA	F14L17.10|F14L17_10	0	0	0
AT1G14340	0	0	1	1	0	0	0	0	0	0	0	0	0	0	0	0	0	1	NA	NA	290.8	266.3	NA	NA	NA	NA	NA	NA	NA	NA	NA	NA	NA	NA	NA	231.7	F14L17.11|F14L17_11	0	0	0
AT1G14350	0	0	0	0	0	0	0	0	0	0	0	0	1	0	0	0	0	0	NA	NA	NA	NA	NA	NA	NA	NA	NA	NA	NA	NA	43.7	NA	NA	NA	NA	NA	AtMYB124|F14L17.12|F14L17_12|FOUR LIPS|MYB124|myb domain protein 124	1	0	0
AT1G14360	0	0	1	1	1	0	0	1	0	0	0	0	0	0	0	0	0	0	NA	NA	203.2	205.1	147.7	NA	NA	159.8	NA	NA	NA	NA	NA	NA	NA	NA	NA	NA	ATUTR3|F14L17.13|F14L17_13|UDP-galactose transporter 3	0	0	0
AT1G14370	0	0	1	1	0	1	0	0	0	0	0	0	0	0	0	0	0	1	NA	NA	255	250.2	NA	124.9	NA	NA	NA	NA	NA	NA	NA	NA	NA	NA	NA	130.2	F14L17.14|F14L17_14|Kin1|PBL2|PBS1-like 2|PROTEIN KINASE 2A|kinase 1|protein kinase 2A	0	0	1
AT1G14380	1	0	1	1	0	0	1	0	0	0	1	1	0	1	0	0	0	0	157.4	NA	139.7	136.4	NA	NA	143.6	NA	NA	NA	204.4	198.5	NA	165.2	NA	NA	NA	NA	F14L17.15|F14L17_15|IQ-domain 28	0	0	0
AT1G14400	0	0	1	1	0	0	0	0	0	0	0	0	0	0	0	0	0	0	NA	NA	92	64.7	NA	NA	NA	NA	NA	NA	NA	NA	NA	NA	NA	NA	NA	NA	ATUBC1|F14L17.17|F14L17_17|UBIQUITIN CARRIER PROTEIN 1|UBIQUITIN CONJUGATING ENZYME 1|ubiquitin carrier protein 1	0	0	0
AT1G14410	0	0	0	0	0	0	0	1	0	0	0	0	0	0	0	0	0	0	NA	NA	NA	NA	NA	NA	NA	264.5	NA	NA	NA	NA	NA	NA	NA	NA	NA	NA	A. THALIANA WHIRLY 1|ATWHY1|F14L17.18|F14L17_18|PTAC1|WHIRLY 1	0	0	0
AT1G14440	0	0	0	0	0	1	0	0	0	0	0	0	1	0	0	0	1	0	NA	NA	NA	NA	NA	92.8	NA	NA	NA	NA	NA	NA	51.7	NA	NA	NA	325.2	NA	AtHB31|F14L17.21|F14L17_21|FLORAL TRANSITION AT THE MERISTEM2|FTM2|ZHD4|ZINC FINGER HOMEODOMAIN 4|homeobox protein 31	0	0	0
AT1G14450	0	0	0	0	0	0	0	1	0	0	0	0	0	0	0	0	0	0	NA	NA	NA	NA	NA	NA	NA	194.6	NA	NA	NA	NA	NA	NA	NA	NA	NA	NA	F14L17.22|F14L17_22	0	0	0
AT1G14460	0	0	0	1	0	1	0	0	0	0	0	0	0	0	0	0	0	1	NA	NA	NA	68.4	NA	123.3	NA	NA	NA	NA	NA	NA	NA	NA	NA	NA	NA	94.3	F14L17.24|F14L17_24	0	0	0
AT1G14490	0	0	0	0	0	0	0	1	0	0	0	0	0	0	0	0	0	0	NA	NA	NA	NA	NA	NA	NA	131.6	NA	NA	NA	NA	NA	NA	NA	NA	NA	NA	AHL28|AT-hook motif nuclear localized protein 28|F14L17.27|F14L17_27	0	0	0
AT1G14500	1	0	0	0	0	0	0	0	0	0	0	0	0	0	0	0	0	0	192.3	NA	NA	NA	NA	NA	NA	NA	NA	NA	NA	NA	NA	NA	NA	NA	NA	NA	F14L17.28|F14L17_28	0	0	0
AT1G14510	0	0	0	0	0	0	0	1	0	0	1	1	0	0	0	0	0	0	NA	NA	NA	NA	NA	NA	NA	149.1	NA	NA	109	106	NA	NA	NA	NA	NA	NA	AtAL7|F14L17.29|F14L17_29|alfin-like 7	0	0	0
AT1G14518	0	0	0	0	0	0	1	0	0	0	0	0	0	0	0	0	0	0	NA	NA	NA	NA	NA	NA	63	NA	NA	NA	NA	NA	NA	NA	NA	NA	NA	NA	-	0	0	0
AT1G14520	0	1	1	1	1	1	0	1	0	0	1	1	0	0	0	0	0	1	NA	156.3	349.5	342.1	127.9	137.1	NA	548	NA	NA	162.4	141.7	NA	NA	NA	NA	NA	254.3	F14L17.30|F14L17_30|myo-inositol oxygenase 1	0	0	0
AT1G14540	0	0	1	1	1	0	1	0	1	0	1	0	0	0	0	0	0	1	NA	NA	376	294.2	148	NA	76.7	NA	96.4	NA	162.4	NA	NA	NA	NA	NA	NA	216.6	F14L17.32|F14L17_32|peroxidase 4	0	0	0
AT1G14549	0	0	1	0	0	0	0	0	0	0	0	0	0	0	0	0	0	0	NA	NA	275.2	NA	NA	NA	NA	NA	NA	NA	NA	NA	NA	NA	NA	NA	NA	NA	NoInfo	0	0	0
AT1G14560	0	0	0	0	0	0	1	1	0	0	0	0	0	0	0	0	0	0	NA	NA	NA	NA	NA	NA	63	141.1	NA	NA	NA	NA	NA	NA	NA	NA	NA	NA	CoA Carrier 1|CoAc1|T5E21.6|T5E21_6	0	0	0
AT1G14570	0	0	0	0	0	0	0	1	0	0	0	0	0	0	0	0	0	0	NA	NA	NA	NA	NA	NA	NA	185.3	NA	NA	NA	NA	NA	NA	NA	NA	NA	NA	AtPUX7|PUX7|T5E21.7|T5E21_7|plant UBX domain-containing protein 7	0	0	0
AT1G14580	0	1	1	1	0	0	1	1	0	0	0	0	1	0	0	0	0	1	NA	154.9	147.1	143.8	NA	NA	96.4	467.1	NA	NA	NA	NA	52.4	NA	NA	NA	NA	220	T5E21.8|T5E21_8	0	0	0
AT1G14600	0	1	1	1	1	1	0	1	0	0	1	1	0	0	0	0	1	1	NA	178.6	272.3	240.2	220.3	169.7	NA	128.9	NA	NA	243.9	197.9	NA	NA	NA	NA	227.6	248.1	T5E21.10|T5E21_10	0	0	0
AT1G14610	0	0	0	0	0	0	0	0	0	0	0	0	1	0	0	0	0	0	NA	NA	NA	NA	NA	NA	NA	NA	NA	NA	NA	NA	56.6	NA	NA	NA	NA	NA	T5E21.11|T5E21_11|TWIN 2|VALRS|VALYL TRNA SYNTHETASE	0	0	0
AT1G14620	0	1	1	1	1	1	1	1	0	0	1	1	0	1	0	0	1	1	NA	110.1	128.6	154.7	77.8	107.2	141.6	151.6	NA	NA	166.3	153.7	NA	161.7	NA	NA	261.4	261.8	T5E21.12|T5E21_12	0	0	0
AT1G14630	0	0	0	0	0	0	0	1	0	0	0	0	0	0	0	0	0	0	NA	NA	NA	NA	NA	NA	NA	140.1	NA	NA	NA	NA	NA	NA	NA	NA	NA	NA	T5E21.19|T5E21_19	0	0	0
AT1G14640	0	0	1	1	1	0	0	0	0	0	0	0	1	0	0	0	0	1	NA	NA	353.1	410.5	136.9	NA	NA	NA	NA	NA	NA	NA	55.8	NA	NA	NA	NA	174.8	T5E21.18|T5E21_18	0	0	0
AT1G14642	0	0	0	0	0	0	0	1	0	0	0	0	0	0	0	0	0	0	NA	NA	NA	NA	NA	NA	NA	122.6	NA	NA	NA	NA	NA	NA	NA	NA	NA	NA	-	0	0	0
AT1G14650	0	1	0	0	0	0	0	1	0	0	0	0	0	0	0	0	0	0	NA	97.8	NA	NA	NA	NA	NA	95.7	NA	NA	NA	NA	NA	NA	NA	NA	NA	NA	T5E21.13|T5E21_13	0	0	0
AT1G14680	0	0	0	0	0	0	0	1	0	0	0	0	0	0	0	0	0	0	NA	NA	NA	NA	NA	NA	NA	292.5	NA	NA	NA	NA	NA	NA	NA	NA	NA	NA	F10B6.4|F10B6_4	0	0	0
AT1G14685	0	1	1	1	1	1	0	0	0	0	1	1	0	0	0	0	0	1	NA	170.1	214.4	186	131.8	189.9	NA	NA	NA	NA	155.3	138.2	NA	NA	NA	NA	NA	145	ATBPC2|BASIC PENTACYSTEINE 2|BBR/BPC2|F10B6.5|F10B6_5|basic pentacysteine 2	0	0	0
AT1G14690	0	0	1	1	1	1	1	1	1	0	1	1	0	0	0	0	0	1	NA	NA	293.3	309.6	160.5	118.9	78.7	1088.2	126.1	NA	187.8	208.1	NA	NA	NA	NA	NA	240.9	F10B6.8|F10B6_8|microtubule-associated protein 65-7	0	0	0
AT1G14700	1	0	0	0	0	1	1	1	0	0	0	0	0	0	0	0	0	0	210.9	NA	NA	NA	NA	117.4	147.5	298.7	NA	NA	NA	NA	NA	NA	NA	NA	NA	NA	ATPAP3|F10B6.10|F10B6_10|purple acid phosphatase 3	0	0	0
AT1G14710	0	0	1	0	0	0	0	1	0	0	0	0	0	0	0	0	0	0	NA	NA	227.7	NA	NA	NA	NA	168.3	NA	NA	NA	NA	NA	NA	NA	NA	NA	NA	F10B6.11|F10B6_11	0	0	0
AT1G14720	0	1	1	1	1	1	1	1	0	0	1	1	0	0	0	0	1	1	NA	182.1	264.6	297.8	138.5	148.4	198.7	371.6	NA	NA	257	254.9	NA	NA	NA	NA	491.5	376.7	ATXTH28|ENDOXYLOGLUCAN TRANSFERASE A2|EXGT-A2|F10B6.12|F10B6_12|XTR2|XYLOGLUCAN ENDOTRANSGLYCOSYLASE-RELATED PROTEIN|xyloglucan endotransglucosylase/hydrolase 28|xyloglucan endotransglycosylase related 2	0	0	0
AT1G14740	1	1	1	1	1	1	1	0	0	0	1	1	0	0	0	0	0	1	124.8	199	251	264.3	161.4	149.8	80.7	NA	NA	NA	213.6	165.7	NA	NA	NA	NA	NA	237.2	F10B6.14|F10B6_14|TITANIA 1	0	0	0
AT1G14750	0	0	0	0	0	0	0	1	0	0	0	0	0	0	0	0	0	0	NA	NA	NA	NA	NA	NA	NA	125.6	NA	NA	NA	NA	NA	NA	NA	NA	NA	NA	F10B6.15|F10B6_15|SOLO DANCERS	0	0	0
AT1G14760	0	0	0	0	0	0	0	1	0	0	0	0	0	0	0	0	0	0	NA	NA	NA	NA	NA	NA	NA	275.2	NA	NA	NA	NA	NA	NA	NA	NA	NA	NA	F10B6.16|F10B6_16|KNOX Arabidopsis thaliana meinox	0	0	0
AT1G14780	0	1	1	1	1	1	0	1	1	0	1	1	1	0	0	0	0	1	NA	153.9	261.3	240.9	136.2	113.2	NA	289.7	143.8	NA	263.2	228.9	56.6	NA	NA	NA	NA	156.3	F10B6.18|F10B6_18	0	0	0
AT1G14790	0	0	1	1	0	0	0	0	0	0	0	0	0	0	0	0	0	0	NA	NA	100.8	106.1	NA	NA	NA	NA	NA	NA	NA	NA	NA	NA	NA	NA	NA	NA	ATRDRP1|AtRDR1|F10B6.19|F10B6_19|RNA-dependent RNA polymerase 1	0	0	0
AT1G14810	0	0	0	0	0	0	0	0	0	0	0	0	1	0	0	0	0	0	NA	NA	NA	NA	NA	NA	NA	NA	NA	NA	NA	NA	55.1	NA	NA	NA	NA	NA	F10B6.22|F10B6_22	0	0	1
AT1G14820	0	1	1	1	0	0	0	1	0	0	1	1	0	0	0	0	0	1	NA	145.4	88.6	94.4	NA	NA	NA	148.6	NA	NA	148.3	132.5	NA	NA	NA	NA	NA	150.8	F10B6.40|F10B6_40	0	0	0
AT1G14840	0	1	0	0	0	1	0	1	0	0	1	1	0	0	0	0	1	1	NA	120	NA	NA	NA	68.3	NA	393.1	NA	NA	192.6	175.9	NA	NA	NA	NA	483.3	202.9	ATMAP70-4|F10B6.24|F10B6_24|microtubule-associated proteins 70-4	0	0	0
AT1G14860	0	0	1	1	1	0	1	0	0	0	0	1	0	0	0	0	0	1	NA	NA	399.3	388.9	220.4	NA	210.5	NA	NA	NA	NA	183.7	NA	NA	NA	NA	NA	197.8	F10B6.26|F10B6_26|atnudt18|nudix hydrolase homolog 18	0	0	0
AT1G14870	0	0	1	1	0	1	1	1	0	0	0	0	0	1	0	0	0	1	NA	NA	339.4	298.6	NA	125.8	122	89.9	NA	NA	NA	NA	NA	109.3	NA	NA	NA	193	AtPCR2|F10B6.27|F10B6_27|PLANT CADMIUM RESISTANCE 2	0	0	0
AT1G14890	0	1	0	1	1	1	1	1	0	0	1	1	0	0	0	0	0	1	NA	187	NA	134.3	189.6	256.8	147.5	134.4	NA	NA	192.5	204.3	NA	NA	NA	NA	NA	206.7	F10B6.30|F10B6_30	0	0	0
AT1G14910	0	0	0	0	1	1	1	0	0	0	0	0	0	1	0	1	0	0	NA	NA	NA	NA	163	230.5	383.6	NA	NA	NA	NA	NA	NA	245.3	NA	163.8	NA	NA	F10B6.32|F10B6_32	0	0	0
AT1G14920	0	1	0	0	0	0	0	1	0	0	0	0	0	0	0	0	1	1	NA	221.3	NA	NA	NA	NA	NA	181.6	NA	NA	NA	NA	NA	NA	NA	NA	761.6	301.9	F10B6.34|F10B6_34|GAI PROTEIN|GIBBERELLIC ACID INSENSITIVE|RESTORATION ON GROWTH ON AMMONIA 2|RGA2	0	0	0
AT1G14930	0	0	1	1	0	0	0	0	0	0	0	0	0	0	0	0	0	1	NA	NA	237.4	212.2	NA	NA	NA	NA	NA	NA	NA	NA	NA	NA	NA	NA	NA	209.4	F10B6.35|F10B6_35	0	0	0
AT1G14950	0	0	1	1	0	0	0	0	0	0	0	0	0	0	0	0	0	0	NA	NA	86.5	81.4	NA	NA	NA	NA	NA	NA	NA	NA	NA	NA	NA	NA	NA	NA	F10B6.38|F10B6_38	0	0	0
AT1G14960	0	0	0	1	0	0	0	0	0	0	0	0	0	0	0	0	0	0	NA	NA	NA	88.6	NA	NA	NA	NA	NA	NA	NA	NA	NA	NA	NA	NA	NA	NA	F10B6.39|F10B6_39	0	0	1
AT1G14970	0	0	0	0	0	0	0	1	0	0	0	0	0	0	0	0	0	0	NA	NA	NA	NA	NA	NA	NA	196.1	NA	NA	NA	NA	NA	NA	NA	NA	NA	NA	-	0	0	0
AT1G14990	0	0	0	0	0	0	0	1	0	0	0	0	0	0	0	0	0	0	NA	NA	NA	NA	NA	NA	NA	137.9	NA	NA	NA	NA	NA	NA	NA	NA	NA	NA	T15D22.3|T15D22_3	0	0	0
AT1G15000	0	0	0	1	0	0	0	0	0	0	0	0	0	0	0	0	0	0	NA	NA	NA	148.5	NA	NA	NA	NA	NA	NA	NA	NA	NA	NA	NA	NA	NA	NA	T15D22.4|T15D22_4|serine carboxypeptidase-like 50	0	0	0
AT1G15010	0	0	1	1	0	0	1	0	0	0	0	0	0	0	0	0	0	1	NA	NA	196.4	189.2	NA	NA	102.3	NA	NA	NA	NA	NA	NA	NA	NA	NA	NA	168.3	T15D22.5|T15D22_5	0	0	0
AT1G15020	0	0	1	0	1	1	1	0	0	0	0	1	0	0	0	0	0	1	NA	NA	166.1	NA	112.1	116	110.2	NA	NA	NA	NA	120.5	NA	NA	NA	NA	NA	123	ATQSOX1|QSO2|T15D22.7|T15D22_7|quiescin-sulfhydryl oxidase 1	0	0	0
AT1G15040	0	0	1	1	1	0	0	0	0	0	0	0	0	0	0	0	0	1	NA	NA	357.9	314.3	130	NA	NA	NA	NA	NA	NA	NA	NA	NA	NA	NA	NA	94.3	GAT|T15D22.12|T15D22_12|glutamine amidotransferase|glutamine amidotransferase 1_2.1	0	0	0
AT1G15050	0	0	0	0	0	0	0	1	0	0	0	0	0	0	0	0	0	0	NA	NA	NA	NA	NA	NA	NA	364.4	NA	NA	NA	NA	NA	NA	NA	NA	NA	NA	T15D22.10|T15D22_10|indole-3-acetic acid inducible 34	1	1	1
AT1G15060	0	1	0	0	0	0	0	0	0	0	0	0	0	0	0	0	0	0	NA	107.3	NA	NA	NA	NA	NA	NA	NA	NA	NA	NA	NA	NA	NA	NA	NA	NA	-	0	0	0
AT1G15090	0	0	1	1	0	0	0	1	0	0	0	0	0	0	0	0	0	0	NA	NA	297.7	273.7	NA	NA	NA	336.4	NA	NA	NA	NA	NA	NA	NA	NA	NA	NA	51439.TRNA-ASN-1	0	0	0
AT1G15100	0	0	1	1	1	1	0	0	0	0	0	0	1	0	0	0	1	1	NA	NA	417.5	363.1	178.1	154.8	NA	NA	NA	NA	NA	NA	54.7	NA	NA	NA	207.8	237.2	RING-H2 FINGER PROTEIN RHA2A|RING-H2 finger A2A	0	0	1
AT1G15110	0	1	0	0	0	0	0	0	1	0	0	0	0	0	0	0	1	1	NA	216	NA	NA	NA	NA	NA	NA	132.9	NA	NA	NA	NA	NA	NA	NA	174	292.4	AtPSS1|F9L1.4|F9L1_4|phosphatidylserine synthase 1	0	0	0
AT1G15120	1	1	1	1	1	1	1	1	0	0	1	1	0	0	0	0	0	1	175.2	225.1	587.9	622.8	300	130.6	186.9	160.1	NA	NA	226.9	197	NA	NA	NA	NA	NA	284.5	F9L1.5|F9L1_5	0	0	0
AT1G15125	0	0	1	1	0	0	0	1	0	0	0	0	0	0	0	0	0	1	NA	NA	255.9	267.6	NA	NA	NA	117.4	NA	NA	NA	NA	NA	NA	NA	NA	NA	146.7	-	0	0	0
AT1G15140	0	1	1	1	0	0	0	0	0	0	0	1	0	0	0	0	0	1	NA	94.6	61.1	80.4	NA	NA	NA	NA	NA	NA	NA	81.8	NA	NA	NA	NA	NA	59.6	F9L1.8|F9L1_8	0	0	0
AT1G15165	0	1	1	1	0	0	0	0	0	0	1	0	0	0	0	0	1	1	NA	177.5	140.7	171.8	NA	NA	NA	NA	NA	NA	105.1	NA	NA	NA	NA	NA	124.7	128.9	-	0	0	0
AT1G15170	0	0	0	0	0	0	0	1	0	0	0	0	0	0	0	0	0	0	NA	NA	NA	NA	NA	NA	NA	257.8	NA	NA	NA	NA	NA	NA	NA	NA	NA	NA	F9L1.11|F9L1_11	0	0	0
AT1G15175	0	0	1	1	0	0	0	1	0	0	0	1	0	0	0	0	0	1	NA	NA	133.6	125.8	NA	NA	NA	212.5	NA	NA	NA	113.4	NA	NA	NA	NA	NA	194.7	-	0	0	0
AT1G15180	0	1	0	0	0	0	0	0	0	0	0	0	0	0	0	0	0	0	NA	154.9	NA	NA	NA	NA	NA	NA	NA	NA	NA	NA	NA	NA	NA	NA	NA	NA	F9L1.12|F9L1_12	0	0	0
AT1G15190	0	1	1	1	1	1	0	0	0	0	1	0	0	0	0	0	0	1	NA	141.5	206.5	208.9	120.2	105.1	NA	NA	NA	NA	114.2	NA	NA	NA	NA	NA	NA	162.5	F9L1.13|F9L1_13	0	0	0
AT1G15210	1	1	1	1	1	1	1	1	0	0	1	1	0	0	1	0	0	1	169	165.9	380.9	363.5	195.4	133.7	82.6	154.1	NA	NA	127.1	128.8	NA	NA	98.4	NA	NA	178.6	ATP-binding cassette G35|ATPDR7|F9L1.15|F9L1_15|PDR7|PLEIOTROPIC DRUG RESISTANCE 7|pleiotropic drug resistance 7	0	0	1
AT1G15215	0	0	0	0	0	0	1	0	0	0	0	0	0	0	0	0	0	0	NA	NA	NA	NA	NA	NA	66.9	NA	NA	NA	NA	NA	NA	NA	NA	NA	NA	NA	DNA-binding transcription factor 1|DTF1|SAWADEE homeodomain homolog 1	0	0	0
AT1G15230	0	1	1	0	0	0	0	1	0	0	0	0	0	0	0	0	0	0	NA	110.1	69.9	NA	NA	NA	NA	96.7	NA	NA	NA	NA	NA	NA	NA	NA	NA	NA	F9L1.18|F9L1_18	0	0	0
AT1G15240	0	0	0	0	0	0	0	0	0	0	1	1	0	0	0	0	0	0	NA	NA	NA	NA	NA	NA	NA	NA	NA	NA	152.8	123	NA	NA	NA	NA	NA	NA	F9L1.19|F9L1_19	0	0	0
AT1G15260	0	1	0	0	0	0	0	0	0	0	0	0	0	0	0	0	1	1	NA	127	NA	NA	NA	NA	NA	NA	NA	NA	NA	NA	NA	NA	NA	NA	365.8	135.4	F9L1.20|F9L1_20	0	0	1
AT1G15290	0	1	1	1	1	1	0	1	0	0	1	1	0	0	0	0	1	1	NA	156	114.9	110.5	97.8	191.2	NA	167.6	NA	NA	149.3	146.9	NA	NA	NA	NA	239.7	209.4	F9L1.23|F9L1_23	0	0	1
AT1G15300	0	0	0	0	0	0	0	1	0	0	0	0	0	0	0	0	0	0	NA	NA	NA	NA	NA	NA	NA	232.3	NA	NA	NA	NA	NA	NA	NA	NA	NA	NA	F9L1.24|F9L1_24	0	0	0
AT1G15340	1	1	1	1	1	1	1	1	0	0	1	1	0	0	0	0	0	1	183	161.3	218.4	196.8	117.2	122.6	110.2	134.9	NA	NA	186.3	166.1	NA	NA	NA	NA	NA	152.2	F9L1.28|F9L1_28|methyl-CPG-binding domain 10	0	0	0
AT1G15360	0	0	0	0	0	0	0	1	0	0	0	0	0	0	0	0	1	0	NA	NA	NA	NA	NA	NA	NA	119.9	NA	NA	NA	NA	NA	NA	NA	NA	211.7	NA	AtSHN1|F9L1.31|F9L1_31|SHINE 1|WAX INDUCER 1|WIN1	0	0	0
AT1G15370	0	1	0	0	0	0	0	0	0	0	0	0	0	0	0	0	0	0	NA	114	NA	NA	NA	NA	NA	NA	NA	NA	NA	NA	NA	NA	NA	NA	NA	NA	F9L1.32|F9L1_32	0	0	0
AT1G15380	0	0	1	1	0	0	1	0	0	0	0	0	0	0	0	0	0	1	NA	NA	238.9	209.6	NA	NA	118	NA	NA	NA	NA	NA	NA	NA	NA	NA	NA	154.9	F9L1.33|F9L1_33|glyoxylase I 4	0	0	1
AT1G15400	0	0	1	0	0	1	1	1	0	0	1	0	0	0	0	0	0	0	NA	NA	189.9	NA	NA	150.2	123.9	133.9	NA	NA	204.6	NA	NA	NA	NA	NA	NA	NA	F9L1.35|F9L1_35	0	0	0
AT1G15430	0	1	1	1	1	1	0	0	0	0	0	0	0	0	0	0	0	1	NA	167.3	216.9	177.2	142.2	174.5	NA	NA	NA	NA	NA	NA	NA	NA	NA	NA	NA	193.6	F9L1.39|F9L1_39	0	0	1
AT1G15440	0	1	0	0	0	0	0	1	0	0	0	0	0	0	0	0	0	0	NA	102	NA	NA	NA	NA	NA	146.6	NA	NA	NA	NA	NA	NA	NA	NA	NA	NA	(PERIODIC TRYPTOPHAN PROTEIN 2|ATPWP2|F9L1.40|F9L1_40|PERIODIC TRYPTOPHAN PROTEIN 2|periodic tryptophan protein 2	0	0	0
AT1G15460	0	0	0	0	1	0	0	1	0	0	1	0	0	0	0	0	0	0	NA	NA	NA	NA	95.3	NA	NA	124.1	NA	NA	105.4	NA	NA	NA	NA	NA	NA	NA	ARABIDOPSIS THALIANA REQUIRES HIGH BORON 4|ATBOR4|F9L1.41|F9L1_41|REQUIRES HIGH BORON 4	0	0	0
AT1G15470	0	0	1	1	0	0	0	0	0	0	0	0	0	0	0	0	0	0	NA	NA	150.6	152.1	NA	NA	NA	NA	NA	NA	NA	NA	NA	NA	NA	NA	NA	NA	F9L1.42|F9L1_42	0	0	0
AT1G15480	0	0	1	1	0	0	0	1	0	0	0	0	0	0	0	0	0	1	NA	NA	122.5	130.5	NA	NA	NA	148.9	NA	NA	NA	NA	NA	NA	NA	NA	NA	92.9	F9L1.43|F9L1_43	0	0	1
AT1G15490	0	0	1	1	0	0	0	0	0	0	0	0	0	0	0	0	1	0	NA	NA	193.2	168.3	NA	NA	NA	NA	NA	NA	NA	NA	NA	NA	NA	NA	133.4	NA	F9L1.44|F9L1_44	0	0	1
AT1G15500	0	1	0	0	0	0	1	0	0	0	0	0	0	0	0	0	0	0	NA	110.5	NA	NA	NA	NA	57.1	NA	NA	NA	NA	NA	NA	NA	NA	NA	NA	NA	T16N11.1|T16N11_1	0	0	0
AT1G15520	0	0	1	1	0	0	0	1	0	0	0	0	0	0	0	0	0	1	NA	NA	189.6	177.3	NA	NA	NA	145.1	NA	NA	NA	NA	NA	NA	NA	NA	NA	110	ARABIDOPSIS THALIANA ATP-BINDING CASSETTE FAMILY G 40|ATABCG40|ATP-BINDING CASSETTE FAMILY G40|ATP-binding cassette G40|ATPDR12|Arabidopsis thaliana ATP-binding cassette G40|PDR12|PLEIOTROPIC DRUG RESISTANCE 12|T16N11.3|T16N11_3|pleiotropic drug resistance 12	0	0	0
AT1G15540	0	0	0	0	0	0	0	1	0	0	0	0	0	0	0	0	0	0	NA	NA	NA	NA	NA	NA	NA	113.4	NA	NA	NA	NA	NA	NA	NA	NA	NA	NA	T16N11.5|T16N11_5	0	0	0
AT1G15550	0	0	0	0	0	0	0	0	0	0	0	0	0	0	0	0	0	1	NA	NA	NA	NA	NA	NA	NA	NA	NA	NA	NA	NA	NA	NA	NA	NA	NA	139.2	ARABIDOPSIS THALIANA GIBBERELLIN 3 BETA-HYDROXYLASE 1|ATGA3OX1|GA REQUIRING 4|GA4|GIBBERELLIN 3 BETA-HYDROXYLASE|T16N11.6|T16N11_6|gibberellin 3-oxidase 1	0	0	1
AT1G15560	0	0	0	0	0	0	0	0	0	0	0	0	1	0	0	0	0	0	NA	NA	NA	NA	NA	NA	NA	NA	NA	NA	NA	NA	43.7	NA	NA	NA	NA	NA	T16N11.7|T16N11_7	0	0	0
AT1G15570	0	1	1	1	0	0	0	0	0	0	0	0	0	0	0	0	1	1	NA	86.8	112.9	107.9	NA	NA	NA	NA	NA	NA	NA	NA	NA	NA	NA	NA	405	92.2	CYCLIN A2;3|T16N11.8|T16N11_8	0	0	0
AT1G15580	1	0	1	1	1	1	1	1	1	1	1	1	1	1	1	1	0	1	740.3	NA	125.3	156.9	97.7	126	257.7	2903.3	167.9	337.1	263.2	296.4	126.5	571.9	265.4	269.2	NA	154.2	ATAUX2-27|AUX2-27|AUXIN-INDUCIBLE 2-27|T16N11.9|T16N11_9|indole-3-acetic acid inducible 5	1	1	1
AT1G15610	0	0	0	0	0	0	0	1	0	0	0	0	0	0	0	0	0	0	NA	NA	NA	NA	NA	NA	NA	225	NA	NA	NA	NA	NA	NA	NA	NA	NA	NA	T16N11.11|T16N11_11	0	0	0
AT1G15630	0	0	0	0	0	0	0	1	0	0	0	0	0	0	0	0	0	0	NA	NA	NA	NA	NA	NA	NA	255.5	NA	NA	NA	NA	NA	NA	NA	NA	NA	NA	T16N11.14|T16N11_14	0	0	0
AT1G15640	0	0	1	1	0	0	0	0	0	0	0	0	0	0	0	0	0	0	NA	NA	128.1	109.6	NA	NA	NA	NA	NA	NA	NA	NA	NA	NA	NA	NA	NA	NA	T16N11.15|T16N11_15	0	0	0
AT1G15650	0	0	0	0	0	0	1	0	0	0	0	0	0	0	0	0	0	0	NA	NA	NA	NA	NA	NA	53.1	NA	NA	NA	NA	NA	NA	NA	NA	NA	NA	NA	51691.TRNA-SER-1	0	0	0
AT1G15670	0	0	0	0	0	0	0	0	0	0	0	0	1	0	0	0	0	1	NA	NA	NA	NA	NA	NA	NA	NA	NA	NA	NA	NA	67.6	NA	NA	NA	NA	283.8	F7H2.1|F7H2_1|KFB01|KISS ME DEADLY 2|KMD2|Kelch repeat F-box 1	0	0	0
AT1G15690	1	1	1	1	1	1	1	1	0	0	1	0	1	0	0	0	1	1	132.6	145	211.1	185.3	170.7	186.6	122	218.8	NA	NA	192.3	NA	50.1	NA	NA	NA	254.7	170.3	ARABIDOPSIS THALIANA V-PPASE 3|ATAVP3|AVP-3|AtAVP1|AtVHP1;1|F7H2.3|F7H2_3|FUGU 5|FUGU5|VACUOLAR H+ - PYROPHOSPHATASE AVP-3|VHP1	1	0	0
AT1G15700	0	0	0	0	0	0	0	1	0	0	0	0	0	0	0	0	0	0	NA	NA	NA	NA	NA	NA	NA	155.6	NA	NA	NA	NA	NA	NA	NA	NA	NA	NA	F7H2.4|F7H2_4	0	0	0
AT1G15720	0	0	0	0	1	1	0	1	0	0	0	0	0	0	0	0	0	1	NA	NA	NA	NA	117.1	114.1	NA	143.1	NA	NA	NA	NA	NA	NA	NA	NA	NA	126.5	F7H2.6|F7H2_6|TRF-like 5	0	0	0
AT1G15740	0	0	1	0	0	0	1	1	0	0	0	0	0	0	0	0	1	0	NA	NA	115.3	NA	NA	NA	108.2	92.7	NA	NA	NA	NA	NA	NA	NA	NA	163.8	NA	F7H2.8|F7H2_8	0	0	0
AT1G15750	1	1	1	1	1	1	1	1	1	1	1	1	0	0	1	0	0	1	188.4	289.4	541.7	428.9	346.4	266	261.7	120.6	147.4	180.1	346.2	338.9	NA	NA	155.4	NA	NA	440.8	F7H2.9|F7H2_9|TOPLESS|WSIP1|WUS-INTERACTING PROTEIN 1	1	0	0
AT1G15757	0	0	1	1	0	1	0	0	0	0	0	0	0	0	0	0	0	0	NA	NA	278.7	293	NA	160.7	NA	NA	NA	NA	NA	NA	NA	NA	NA	NA	NA	NA	-	0	0	0
AT1G15772	0	0	0	0	0	0	0	1	0	0	0	0	0	0	0	0	0	0	NA	NA	NA	NA	NA	NA	NA	146.1	NA	NA	NA	NA	NA	NA	NA	NA	NA	NA	-	0	0	0
AT1G15790	0	0	0	0	0	0	0	1	0	0	0	0	0	0	0	0	0	0	NA	NA	NA	NA	NA	NA	NA	152.4	NA	NA	NA	NA	NA	NA	NA	NA	NA	NA	F7H2.13|F7H2_13	0	0	0
AT1G15800	0	1	1	1	1	1	1	0	0	0	0	0	0	0	0	0	0	1	NA	150.7	190.4	188.3	123.3	136.6	102.3	NA	NA	NA	NA	NA	NA	NA	NA	NA	NA	154.9	F7H2.14|F7H2_14	0	0	0
AT1G15820	0	0	0	0	1	0	0	0	0	0	0	0	0	0	0	0	0	1	NA	NA	NA	NA	126.6	NA	NA	NA	NA	NA	NA	NA	NA	NA	NA	NA	NA	132	CHLOROPHYLL PROTEIN 24|CP24|F7H2.16|F7H2_16|light harvesting complex photosystem II subunit 6	0	0	1
AT1G15840	0	0	0	0	0	0	1	0	0	0	0	0	0	0	0	0	0	0	NA	NA	NA	NA	NA	NA	88.5	NA	NA	NA	NA	NA	NA	NA	NA	NA	NA	NA	F7H2.17|F7H2_17	0	0	0
AT1G15870	0	0	0	0	0	0	0	1	0	0	0	0	0	0	0	0	0	0	NA	NA	NA	NA	NA	NA	NA	66.4	NA	NA	NA	NA	NA	NA	NA	NA	NA	NA	F7H2.20|F7H2_20	0	0	0
AT1G15890	0	0	1	1	0	0	0	0	0	0	0	0	0	0	0	0	0	1	NA	NA	149.5	109.6	NA	NA	NA	NA	NA	NA	NA	NA	NA	NA	NA	NA	NA	93.6	F7H2.22|F7H2_22	0	0	0
AT1G15910	0	0	0	0	0	0	0	1	0	0	0	0	0	0	0	0	0	1	NA	NA	NA	NA	NA	NA	NA	46.7	NA	NA	NA	NA	NA	NA	NA	NA	NA	95.6	IDN2 PARALOG 1|IDNL1|IDP1|INVOLVED IN DE NOVO 2 (IDN2) - LIKE 1|T24D18.1|T24D18_1|factor of DNA methylation 1	0	0	0
AT1G15920	0	0	0	0	0	0	0	1	0	0	0	0	0	0	0	0	0	0	NA	NA	NA	NA	NA	NA	NA	72.4	NA	NA	NA	NA	NA	NA	NA	NA	NA	NA	T24D18.2|T24D18_2	0	0	0
AT1G15950	0	0	1	1	1	1	1	1	0	0	1	1	0	0	0	0	0	1	NA	NA	531.3	484.1	229.7	253.4	167.2	126.6	NA	NA	171.3	142.5	NA	NA	NA	NA	NA	389.3	ATCCR1|CINNAMOYL COA REDUCTASE|IRREGULAR XYLEM 4|IRX4|T24D18.5|T24D18_5|cinnamoyl coa reductase 1	0	0	0
AT1G15970	0	1	1	1	1	1	1	1	1	0	1	1	0	0	0	0	0	0	NA	156.7	189.9	171.3	188.3	177.2	74.8	672.9	109.6	NA	215.6	204.9	NA	NA	NA	NA	NA	NA	T24D18.7|T24D18_7	0	0	0
AT1G15980	1	0	0	0	0	0	0	0	0	0	0	0	0	0	0	0	0	1	94.6	NA	NA	NA	NA	NA	NA	NA	NA	NA	NA	NA	NA	NA	NA	NA	NA	170.3	NAD(P)H DEHYDROGENASE SUBUNIT 48|NDF1|NDH-dependent cyclic electron flow 1|NDH48|Photosynthetic NDH subcomplex B 1|T24D18.8|T24D18_8	0	0	0
AT1G16010	0	0	0	0	0	0	0	0	0	0	0	0	1	0	0	0	0	0	NA	NA	NA	NA	NA	NA	NA	NA	NA	NA	NA	NA	67.6	NA	NA	NA	NA	NA	AtMGT2|AtMRS2-1|MRS2-1|T24D18.11|T24D18_11|magnesium transporter 2	0	0	0
AT1G16020	0	1	1	1	0	0	1	0	0	0	1	1	0	0	0	0	0	0	NA	120	111.7	100.2	NA	NA	51.2	NA	NA	NA	101.2	97	NA	NA	NA	NA	NA	NA	CALCIUM CAFFEINE ZINC SENSITIVITY 1a|CCZ1a|T24D18.12|T24D18_12	0	0	0
AT1G16060	0	0	0	0	1	1	0	1	0	0	0	0	0	0	0	0	0	0	NA	NA	NA	NA	95.9	78.6	NA	147.9	NA	NA	NA	NA	NA	NA	NA	NA	NA	NA	ARIA-interacting double AP2 domain protein|T24D18.16|T24D18_16|WRI3|WRINKLED 3	0	0	1
AT1G16070	0	0	0	0	0	0	0	1	0	0	0	0	0	0	0	0	0	0	NA	NA	NA	NA	NA	NA	NA	319.7	NA	NA	NA	NA	NA	NA	NA	NA	NA	NA	AtTLP8|T24D18.17|T24D18_17|tubby like protein 8	0	0	0
AT1G16080	0	0	0	0	0	0	0	1	0	0	0	0	0	0	0	0	0	0	NA	NA	NA	NA	NA	NA	NA	183.1	NA	NA	NA	NA	NA	NA	NA	NA	NA	NA	T24D18.18|T24D18_18	0	0	0
AT1G16100	0	1	0	0	0	0	0	0	0	0	0	0	0	0	0	0	0	0	NA	135.2	NA	NA	NA	NA	NA	NA	NA	NA	NA	NA	NA	NA	NA	NA	NA	NA	51681.TRNA-LYS-1	0	0	0
AT1G16110	0	0	1	1	1	0	0	0	0	0	0	0	0	0	0	0	0	1	NA	NA	233.3	222.7	115.9	NA	NA	NA	NA	NA	NA	NA	NA	NA	NA	NA	NA	157.3	T24D18.30|T24D18_30|wall associated kinase-like 6	0	0	0
AT1G16130	0	1	1	1	1	1	1	0	0	0	1	1	1	0	0	0	0	1	NA	224.4	465.7	461.4	198.2	117.4	94.4	NA	NA	NA	112.5	87.1	68.7	NA	NA	NA	NA	272.5	T24D18.21|T24D18_21|wall associated kinase-like 2	0	0	0
AT1G16150	1	1	1	1	1	1	1	0	1	1	1	1	1	1	1	0	1	1	161.2	270	456.6	457.5	247.7	181.6	167.2	NA	180.3	158	320.4	279.8	67.2	132.6	105.4	NA	197.2	336.2	T24D18.23|T24D18_23|wall associated kinase-like 4	0	0	0
AT1G16160	0	0	1	1	1	0	0	1	0	0	0	0	0	0	0	0	0	0	NA	NA	407.7	389.8	183.6	NA	NA	119.1	NA	NA	NA	NA	NA	NA	NA	NA	NA	NA	T24D18.24|T24D18_24|wall associated kinase-like 5	0	0	1
AT1G16170	0	1	1	1	1	1	0	0	0	0	1	0	0	0	1	0	0	1	NA	195.5	387.8	340.7	227	182	NA	NA	NA	NA	153.9	NA	NA	NA	132.2	NA	NA	163.1	T24D18.25|T24D18_25	0	0	0
AT1G16220	0	0	1	1	0	0	0	1	0	0	1	1	0	0	0	0	0	1	NA	NA	61.7	57.8	NA	NA	NA	569.5	NA	NA	79.7	82	NA	NA	NA	NA	NA	69.9	F3O9.3|F3O9_3	0	0	0
AT1G16240	0	1	0	0	0	0	0	0	0	0	0	1	0	0	0	0	0	0	NA	95.6	NA	NA	NA	NA	NA	NA	NA	NA	NA	74.5	NA	NA	NA	NA	NA	NA	ATSYP51|F3O9.4|F3O9_4|syntaxin of plants 51	0	0	0
AT1G16250	0	0	1	0	0	0	0	0	0	0	0	0	0	0	0	0	0	0	NA	NA	56.8	NA	NA	NA	NA	NA	NA	NA	NA	NA	NA	NA	NA	NA	NA	NA	F3O9.5|F3O9_5	0	0	0
AT1G16260	0	0	1	1	0	0	0	0	0	0	0	0	0	0	0	0	0	0	NA	NA	99.4	85.5	NA	NA	NA	NA	NA	NA	NA	NA	NA	NA	NA	NA	NA	NA	F3O9.6|F3O9_6	0	0	1
AT1G16270	0	1	0	0	0	0	0	1	0	0	0	0	0	0	0	0	0	1	NA	114.7	NA	NA	NA	NA	NA	96.4	NA	NA	NA	NA	NA	NA	NA	NA	NA	110.4	F3O9.7|F3O9_7	0	0	0
AT1G16280	0	0	0	0	0	0	0	1	0	0	0	0	0	0	0	0	0	0	NA	NA	NA	NA	NA	NA	NA	322.7	NA	NA	NA	NA	NA	NA	NA	NA	NA	NA	Arabidopsis thaliana RNA helicase 36|AtRH36|F3O9.8|F3O9_8|RNA helicase 36|SLOW WALKER 3|SWA3	0	0	0
AT1G16300	0	1	1	1	0	0	1	0	0	0	1	0	0	0	0	0	1	1	NA	160.6	114.1	139.9	NA	NA	90.5	NA	NA	NA	140.4	NA	NA	NA	NA	NA	129	95.3	F3O9.10|F3O9_10|glyceraldehyde-3-phosphate dehydrogenase of plastid 2	0	0	0
AT1G16310	0	0	1	0	0	0	0	0	0	0	0	0	0	0	0	0	0	0	NA	NA	92	NA	NA	NA	NA	NA	NA	NA	NA	NA	NA	NA	NA	NA	NA	NA	F3O9.11|F3O9_11	0	0	1
AT1G16320	0	0	1	1	1	1	0	1	0	0	1	1	0	0	0	0	0	1	NA	NA	101.4	85.7	82.1	99.5	NA	118.1	NA	NA	138.1	160.3	NA	NA	NA	NA	NA	74.4	F3O9.12|F3O9_12	0	0	0
AT1G16330	0	0	0	0	0	0	0	1	0	0	0	0	0	0	0	0	0	0	NA	NA	NA	NA	NA	NA	NA	195.6	NA	NA	NA	NA	NA	NA	NA	NA	NA	NA	F3O9.13|F3O9_13|cyclin b3;1	0	0	0
AT1G16350	0	0	0	0	0	0	0	1	0	0	0	0	0	0	0	0	0	0	NA	NA	NA	NA	NA	NA	NA	171.3	NA	NA	NA	NA	NA	NA	NA	NA	NA	NA	F3O9.15|F3O9_15	0	0	0
AT1G16370	1	1	1	1	1	1	1	1	0	0	1	0	0	0	0	0	0	1	137.2	163.7	766.4	758.5	264.1	253	122	211.8	NA	NA	153	NA	NA	NA	NA	NA	NA	318.1	ARABIDOPSIS THALIANA ORGANIC CATION/CARNITINE TRANSPORTER 6|ATOCT6|F3O9.17|F3O9_17|organic cation/carnitine transporter 6	0	0	0
AT1G16380	0	0	0	0	0	0	0	0	0	0	0	0	1	0	0	0	0	0	NA	NA	NA	NA	NA	NA	NA	NA	NA	NA	NA	NA	72.5	NA	NA	NA	NA	NA	CATION EXCHANGER 1|CHX1|F3O9.18|F3O9_18	0	0	0
AT1G16390	0	1	0	0	0	0	0	0	0	0	0	1	0	0	0	0	0	1	NA	96.3	NA	NA	NA	NA	NA	NA	NA	NA	NA	71.3	NA	NA	NA	NA	NA	86.7	ATOCT3|F3O9.19|F3O9_19|organic cation/carnitine transporter 3	0	0	1
AT1G16400	0	0	0	0	0	0	0	1	0	0	0	0	0	0	0	0	0	0	NA	NA	NA	NA	NA	NA	NA	170.3	NA	NA	NA	NA	NA	NA	NA	NA	NA	NA	''cytochrome P450|CYTOCHROME P450 79F2|F3O9.20|F3O9_20|cytochrome P450|family 79|polypeptide 2|polypeptide 2''|subfamily F	1	0	0
AT1G16410	0	0	0	0	0	0	0	0	0	0	0	0	1	0	0	0	0	0	NA	NA	NA	NA	NA	NA	NA	NA	NA	NA	NA	NA	57.3	NA	NA	NA	NA	NA	BUS1|BUSHY 1|F3O9.21|F3O9_21|SPS1|SUPERSHOOT 1|cytochrome p450 79f1	1	0	0
AT1G16420	0	0	1	1	0	0	0	1	0	0	0	0	0	0	0	0	0	1	NA	NA	128.4	108.5	NA	NA	NA	234.3	NA	NA	NA	NA	NA	NA	NA	NA	NA	79.9	ARABIDOPSIS THALIANA METACASPASE 8|ATMC8|AtMCP2e|F3O9.22|F3O9_22|MCP2e|metacaspase 2e|metacaspase 8	0	0	0
AT1G16445	0	0	0	0	0	0	0	1	0	0	0	0	0	0	0	0	0	0	NA	NA	NA	NA	NA	NA	NA	537	NA	NA	NA	NA	NA	NA	NA	NA	NA	NA	-	0	0	0
AT1G16450	0	0	0	0	0	0	1	0	0	0	0	0	0	0	0	0	0	0	NA	NA	NA	NA	NA	NA	72.8	NA	NA	NA	NA	NA	NA	NA	NA	NA	NA	NA	51361.TRNA-ARG-1	0	0	0
AT1G16460	0	1	0	0	0	0	0	0	0	0	0	0	0	0	0	0	0	0	NA	96.3	NA	NA	NA	NA	NA	NA	NA	NA	NA	NA	NA	NA	NA	NA	NA	NA	ARABIDOPSIS THALIANA MERCAPTOPYRUVATE SULFURTRANSFERASE 2|ATMST2|ATRDH2|F3O9.26|F3O9_26|MERCAPTOPYRUVATE SULFURTRANSFERASE|MERCAPTOPYRUVATE SULFURTRANSFERASE 2|MST2|ST2|STR2|SULFURTRANSFERASE 2|rhodanese homologue 2	0	0	0
AT1G16489	0	1	0	0	0	0	0	0	0	0	0	0	0	0	0	0	0	0	NA	98.5	NA	NA	NA	NA	NA	NA	NA	NA	NA	NA	NA	NA	NA	NA	NA	NA	-	0	0	0
AT1G16490	0	0	1	0	0	0	0	1	0	0	0	0	0	0	0	0	0	0	NA	NA	97.5	NA	NA	NA	NA	196.6	NA	NA	NA	NA	NA	NA	NA	NA	NA	NA	ATMYB58|F3O9.29|F3O9_29|MYB DOMAIN PROTEIN 58|myb domain protein 58	0	0	0
AT1G16500	0	0	0	0	0	0	1	0	0	0	1	0	1	0	0	0	0	1	NA	NA	NA	NA	NA	NA	57.1	NA	NA	NA	153.9	NA	57	NA	NA	NA	NA	210.8	F3O9.30|F3O9_30	0	0	0
AT1G16510	0	0	0	0	0	0	0	1	0	0	0	0	0	0	0	0	0	0	NA	NA	NA	NA	NA	NA	NA	647.6	NA	NA	NA	NA	NA	NA	NA	NA	NA	NA	F3O9.31|F3O9_31|SAUR41|SMALL AUXIN UPREGULATED 41	1	1	1
AT1G16515	1	1	1	1	1	1	1	1	1	0	1	1	0	0	0	0	1	1	135.7	177.2	309.7	298.8	232.1	217.9	122	217.5	116.9	NA	267	211.2	NA	NA	NA	NA	206.4	407.5	-	0	0	0
AT1G16520	0	0	0	0	0	0	1	0	0	0	0	0	0	0	0	0	0	0	NA	NA	NA	NA	NA	NA	96.4	NA	NA	NA	NA	NA	NA	NA	NA	NA	NA	NA	F3O9.32	0	0	0
AT1G16540	0	0	0	1	0	0	1	0	0	0	0	0	0	0	0	0	0	0	NA	NA	NA	51	NA	NA	47.2	NA	NA	NA	NA	NA	NA	NA	NA	NA	NA	NA	ABA DEFICIENT 3|ACI2|ALTERED CHLOROPLAST IMPORT 2|ATABA3|AtLOS5|F19K19.13|F19K19_13|LOS5|LOW OSMOTIC STRESS 5|MOLYBDENUM COFACTOR SULFURASE|SIR3|SIRTINOL RESISTANT 3	1	0	0
AT1G16570	0	1	0	0	0	0	0	0	0	0	0	0	0	0	0	0	0	0	NA	81.9	NA	NA	NA	NA	NA	NA	NA	NA	NA	NA	NA	NA	NA	NA	NA	NA	F19K19.11|F19K19_11	0	0	0
AT1G16590	0	0	1	0	0	0	0	1	0	0	0	0	0	0	0	0	0	0	NA	NA	58	NA	NA	NA	NA	112.1	NA	NA	NA	NA	NA	NA	NA	NA	NA	NA	ATREV7|F19K19.10|F19K19_10	0	0	0
AT1G16600	0	0	0	0	0	0	0	1	0	0	0	0	0	0	0	0	0	0	NA	NA	NA	NA	NA	NA	NA	121.6	NA	NA	NA	NA	NA	NA	NA	NA	NA	NA	F19K19.21	0	0	0
AT1G16610	0	0	1	0	0	0	0	1	0	0	1	0	0	0	0	0	0	0	NA	NA	58.6	NA	NA	NA	NA	151.4	NA	NA	82.3	NA	NA	NA	NA	NA	NA	NA	ARGININE/SERINE-RICH PROTEIN SR45|AtSR45|F19K19.9|F19K19_9|RNPS1|arginine/serine-rich 45	0	0	0
AT1G16630	0	1	1	0	0	0	1	1	0	0	0	1	0	0	0	0	0	0	NA	135.9	87.9	NA	NA	NA	76.7	124.6	NA	NA	NA	114.3	NA	NA	NA	NA	NA	NA	F19K19.8|F19K19_8	0	0	0
AT1G16640	0	0	0	0	0	0	0	0	0	0	0	0	0	0	0	0	1	1	NA	NA	NA	NA	NA	NA	NA	NA	NA	NA	NA	NA	NA	NA	NA	NA	162.9	103.2	F19K19.7|F19K19_7	0	0	0
AT1G16660	0	1	1	1	0	0	0	1	0	0	0	0	0	0	0	0	0	1	NA	91.4	129.8	136.9	NA	NA	NA	78.9	NA	NA	NA	NA	NA	NA	NA	NA	NA	75.1	F19K19.5	0	0	0
AT1G16670	0	1	1	1	1	0	1	1	0	0	1	0	0	0	0	0	0	1	NA	99.9	243	234.4	95.8	NA	43.3	102.7	NA	NA	82.6	NA	NA	NA	NA	NA	NA	106.9	F19K19.4|F19K19_4	0	0	0
AT1G16690	0	0	0	0	0	0	0	1	0	0	0	0	0	0	0	0	0	0	NA	NA	NA	NA	NA	NA	NA	121.4	NA	NA	NA	NA	NA	NA	NA	NA	NA	NA	F19K19.2|F19K19_2	0	0	0
AT1G16710	0	0	0	0	0	0	0	1	0	0	0	0	0	0	0	0	0	0	NA	NA	NA	NA	NA	NA	NA	112.9	NA	NA	NA	NA	NA	NA	NA	NA	NA	NA	F19K19.17|histone acetyltransferase of the CBP family 12	0	0	0
AT1G16720	0	0	0	0	0	0	0	1	0	0	0	0	0	0	0	0	0	1	NA	NA	NA	NA	NA	NA	NA	357.9	NA	NA	NA	NA	NA	NA	NA	NA	NA	87.7	F19K19.14|high chlorophyll fluorescence phenotype 173	0	0	1
AT1G16730	0	0	0	0	0	1	0	1	0	0	0	0	0	0	0	0	0	1	NA	NA	NA	NA	NA	96.7	NA	142.9	NA	NA	NA	NA	NA	NA	NA	NA	NA	148.7	F19K19.18|unknown protein 6	0	0	0
AT1G16740	0	1	1	1	1	0	1	0	0	0	1	1	0	0	0	0	0	0	NA	160.9	152.6	164.4	162.3	NA	133.8	NA	NA	NA	175.4	168.2	NA	NA	NA	NA	NA	NA	F19K19.15	0	0	0
AT1G16750	0	0	0	0	1	1	0	1	0	0	1	0	0	0	0	0	1	1	NA	NA	NA	NA	93.8	131.8	NA	115.9	NA	NA	107.1	NA	NA	NA	NA	NA	180.7	138.5	F19K19.16	0	0	0
AT1G16760	0	0	0	0	0	0	0	1	0	0	0	0	0	0	0	0	0	0	NA	NA	NA	NA	NA	NA	NA	185.3	NA	NA	NA	NA	NA	NA	NA	NA	NA	NA	F19K19.25	0	0	0
AT1G16770	0	0	0	0	0	0	1	1	0	0	1	0	1	0	0	0	0	0	NA	NA	NA	NA	NA	NA	53.1	583.2	NA	NA	65.6	NA	52.8	NA	NA	NA	NA	NA	F17F16.12|F17F16_12	0	0	0
AT1G16780	0	0	0	0	0	0	0	0	0	0	1	1	0	0	0	0	0	0	NA	NA	NA	NA	NA	NA	NA	NA	NA	NA	101.7	81	NA	NA	NA	NA	NA	NA	AtVHP2;2|F17F16.2|F17F16_2	0	0	0
AT1G16790	0	0	1	1	0	0	0	0	0	0	0	0	0	0	0	0	0	0	NA	NA	59.8	50.3	NA	NA	NA	NA	NA	NA	NA	NA	NA	NA	NA	NA	NA	NA	F17F16.10|F17F16_10	0	0	0
AT1G16800	0	0	0	0	0	0	0	1	0	0	0	0	0	0	0	0	0	0	NA	NA	NA	NA	NA	NA	NA	138.4	NA	NA	NA	NA	NA	NA	NA	NA	NA	NA	F17F16.1|F17F16_1	0	0	0
AT1G16820	0	1	0	0	0	0	0	1	1	0	1	1	0	0	0	0	0	0	NA	152.1	NA	NA	NA	NA	NA	98.4	97.2	NA	135.6	146	NA	NA	NA	NA	NA	NA	F17F16.15	0	0	0
AT1G16825	0	0	1	1	0	0	0	0	0	0	0	0	0	0	0	0	0	1	NA	NA	91.5	78.6	NA	NA	NA	NA	NA	NA	NA	NA	NA	NA	NA	NA	NA	81.6	-	0	0	0
AT1G16840	0	0	0	0	0	0	0	1	0	0	0	0	0	0	0	0	0	0	NA	NA	NA	NA	NA	NA	NA	162.8	NA	NA	NA	NA	NA	NA	NA	NA	NA	NA	F17F16.27	0	0	1
AT1G16850	0	0	1	1	1	1	1	0	0	0	0	0	0	0	0	0	0	1	NA	NA	140	163.1	137.2	120.8	92.5	NA	NA	NA	NA	NA	NA	NA	NA	NA	NA	108.3	F17F16.17	0	0	0
AT1G16858	0	0	0	0	0	0	0	1	0	0	0	0	0	0	0	0	0	0	NA	NA	NA	NA	NA	NA	NA	122.4	NA	NA	NA	NA	NA	NA	NA	NA	NA	NA	NoInfo	0	0	0
AT1G16870	0	1	1	0	1	0	0	0	0	0	0	1	0	0	0	0	0	0	NA	136.6	179.2	NA	111.5	NA	NA	NA	NA	NA	NA	148.3	NA	NA	NA	NA	NA	NA	F17F16.14	0	0	0
AT1G16880	0	0	1	1	0	0	1	1	0	0	1	0	0	0	0	0	1	1	NA	NA	117.9	166.7	NA	NA	165.3	85.2	NA	NA	133.1	NA	NA	NA	NA	NA	193.8	135	ACT domain repeats 11|F17F16.13	0	0	0
AT1G16916	0	0	0	0	0	0	0	1	0	0	0	0	0	0	0	0	1	0	NA	NA	NA	NA	NA	NA	NA	342.2	NA	NA	NA	NA	NA	NA	NA	NA	124.7	NA	-	0	0	0
AT1G16920	0	0	0	0	0	0	1	0	0	0	1	0	0	0	0	0	0	0	NA	NA	NA	NA	NA	NA	70.8	NA	NA	NA	113.4	NA	NA	NA	NA	NA	NA	NA	ATRABA1B|BEX5|BFA-visualized exocytic trafficking defective 5|F17F16.26|RAB GTPase homolog A1B|RAB11	0	0	0
AT1G16930	0	0	1	0	0	0	0	0	0	0	0	0	0	0	0	0	0	0	NA	NA	96.8	NA	NA	NA	NA	NA	NA	NA	NA	NA	NA	NA	NA	NA	NA	NA	F17F16.22	0	0	0
AT1G16950	0	0	0	0	0	0	0	1	0	0	0	0	0	0	0	0	0	0	NA	NA	NA	NA	NA	NA	NA	404.6	NA	NA	NA	NA	NA	NA	NA	NA	NA	NA	F17F16.23	0	0	0
AT1G16960	0	0	1	0	0	0	0	0	0	0	0	0	0	0	0	0	0	1	NA	NA	40.9	NA	NA	NA	NA	NA	NA	NA	NA	NA	NA	NA	NA	NA	NA	64.4	F17F16.18	0	0	0
AT1G16970	0	0	1	1	0	0	0	0	0	0	0	0	0	0	0	0	0	1	NA	NA	78.3	64.9	NA	NA	NA	NA	NA	NA	NA	NA	NA	NA	NA	NA	NA	80.9	ARABIDOPSIS THALIANA KU70 HOMOLOG|ATKU70|F6I1.2|F6I1_2|KU70 homolog|KU70-LIKE PROTEIN	0	0	0
AT1G17020	0	0	1	0	0	0	0	0	0	0	0	0	1	0	0	0	0	0	NA	NA	90	NA	NA	NA	NA	NA	NA	NA	NA	NA	47.5	NA	NA	NA	NA	NA	ATSRG1|F20D23.28|F20D23_28|SENESCENCE-RELATED GENE 1|senescence-related gene 1	0	0	0
AT1G17040	0	0	0	0	0	1	0	1	0	0	0	0	0	0	0	0	0	0	NA	NA	NA	NA	NA	97.8	NA	384.6	NA	NA	NA	NA	NA	NA	NA	NA	NA	NA	ARABIDOPSIS THALIANA SH2 DOMAIN PROTEIN A|ATSHA|F20D23.26|F20D23_26|SH2 domain protein A|STAT-TYPE LINKER-SH2 DOMAIN FACTOR A|STATLA	0	0	0
AT1G17050	0	0	0	0	0	0	0	1	0	0	0	0	0	0	0	0	0	0	NA	NA	NA	NA	NA	NA	NA	915.6	NA	NA	NA	NA	NA	NA	NA	NA	NA	NA	AtSPS2|F20D23.25|F20D23_25|solanesyl diphosphate synthase 2	0	0	0
AT1G17060	0	1	1	1	0	0	0	1	0	0	1	1	0	0	0	0	0	1	NA	148.6	202.6	190.6	NA	NA	NA	273.2	NA	NA	124.3	135	NA	NA	NA	NA	NA	155.9	CHI2|CHIBI 2|F20D23.24|F20D23_24|SHK1|SHRINK 1|SOB7|SUPPRESSOR OF PHYB-4 7|cytochrome p450 72c1	0	0	1
AT1G17070	0	0	0	0	0	0	0	0	0	0	0	0	1	0	0	0	0	0	NA	NA	NA	NA	NA	NA	NA	NA	NA	NA	NA	NA	54.3	NA	NA	NA	NA	NA	F20D23.23|F20D23_23|SPLICEOSOMAL TIMEKEEPER LOCUS1	0	0	1
AT1G17080	0	0	0	0	0	0	0	1	0	0	0	0	0	0	0	0	0	0	NA	NA	NA	NA	NA	NA	NA	287.2	NA	NA	NA	NA	NA	NA	NA	NA	NA	NA	F20D23.22|F20D23_22	0	0	0
AT1G17090	0	0	1	1	1	0	0	0	0	0	0	0	0	0	0	0	1	1	NA	NA	204.5	191.8	120.5	NA	NA	NA	NA	NA	NA	NA	NA	NA	NA	NA	140.6	121.7	F20D23.31|F20D23_31	0	0	0
AT1G17100	0	0	1	1	0	0	1	0	0	0	0	0	1	0	0	0	0	1	NA	NA	129.3	134.2	NA	NA	68.9	NA	NA	NA	NA	NA	57	NA	NA	NA	NA	110	AtHBP1|F20D23.21|F20D23_21|haem-binding protein 1	0	0	0
AT1G17110	0	0	1	1	1	1	0	0	0	0	0	0	0	0	0	0	0	1	NA	NA	124.2	108.5	99.8	129.8	NA	NA	NA	NA	NA	NA	NA	NA	NA	NA	NA	103.8	F20D23.20|F20D23_20|UBIQUITIN-SPECIFIC PROTEASE 15|ubiquitin-specific protease 15	0	0	0
AT1G17120	0	1	1	1	1	1	1	0	0	0	1	1	0	0	0	0	0	1	NA	168.7	138.4	160.4	153.4	131.8	106.2	NA	NA	NA	173.7	169.2	NA	NA	NA	NA	NA	111	F20D23.19|F20D23_19|cationic amino acid transporter 8	0	0	0
AT1G17140	0	0	1	1	0	0	0	1	0	0	0	0	0	0	0	0	1	1	NA	NA	139.1	121.4	NA	NA	NA	642.9	NA	NA	NA	NA	NA	NA	NA	NA	222.3	131.6	F20D23.32|RIP1|ROP INTERACTIVE PARTNER 1|interactor of constitutive active rops 1	1	0	1
AT1G17147	0	0	1	1	1	0	0	1	0	0	1	0	0	0	0	0	0	1	NA	NA	368.6	344.5	134.1	NA	NA	194.8	NA	NA	172.5	NA	NA	NA	NA	NA	NA	269.4	-	0	0	0
AT1G17170	0	0	1	0	0	0	0	0	0	0	0	0	0	0	0	0	0	0	NA	NA	215.3	NA	NA	NA	NA	NA	NA	NA	NA	NA	NA	NA	NA	NA	NA	NA	ATGSTU24|Arabidopsis thaliana Glutathione S-transferase (class tau) 24|F20D23.13|F20D23_13|GST|glutathione S-transferase TAU 24	0	0	0
AT1G17180	0	0	0	0	0	0	1	0	0	0	0	0	0	0	0	0	0	0	NA	NA	NA	NA	NA	NA	61	NA	NA	NA	NA	NA	NA	NA	NA	NA	NA	NA	ATGSTU25|F20D23.12|F20D23_12|glutathione S-transferase TAU 25	0	0	0
AT1G17190	0	0	0	0	0	0	0	1	0	0	0	0	0	0	0	0	0	0	NA	NA	NA	NA	NA	NA	NA	188.3	NA	NA	NA	NA	NA	NA	NA	NA	NA	NA	ATGSTU26|F20D23.11|F20D23_11|glutathione S-transferase tau 26	0	0	1
AT1G17200	0	0	0	0	0	0	0	1	0	0	0	0	0	0	0	0	0	0	NA	NA	NA	NA	NA	NA	NA	113.9	NA	NA	NA	NA	NA	NA	NA	NA	NA	NA	CASP-like protein 2A1|CASPL2A1|F20D23.10|F20D23_10	0	0	1
AT1G17210	0	0	1	1	1	0	0	0	0	0	1	0	0	0	0	0	0	1	NA	NA	122.6	119.5	77.4	NA	NA	NA	NA	NA	92.4	NA	NA	NA	NA	NA	NA	90.8	ARABIDOPSIS IAP-LIKE PROTEIN|ATILP1|F20D23.9|F20D23_9|IAP-like protein 1	0	0	0
AT1G17220	0	1	0	0	0	0	0	0	0	0	0	0	0	0	0	0	0	0	NA	91.8	NA	NA	NA	NA	NA	NA	NA	NA	NA	NA	NA	NA	NA	NA	NA	NA	F20D23.8|F20D23_8|fu-gaeri1	0	0	0
AT1G17230	0	1	1	1	1	1	1	0	1	0	1	1	0	0	0	0	0	1	NA	205.4	290.2	309.1	233.9	296.9	139.7	NA	104.4	NA	226.9	195.6	NA	NA	NA	NA	NA	355.1	F20D23.7|F20D23_7	0	0	0
AT1G17232	0	0	0	0	0	0	0	1	0	0	0	0	0	0	0	0	0	0	NA	NA	NA	NA	NA	NA	NA	215.5	NA	NA	NA	NA	NA	NA	NA	NA	NA	NA	-	0	0	0
AT1G17240	0	0	0	0	0	0	0	1	0	0	0	0	1	0	0	0	0	0	NA	NA	NA	NA	NA	NA	NA	78.2	NA	NA	NA	NA	57.3	NA	NA	NA	NA	NA	AtRLP2|F20D23.6|F20D23_6|receptor like protein 2	0	0	0
AT1G17250	0	0	1	1	0	0	0	0	0	0	0	0	0	0	0	0	0	0	NA	NA	69.1	52.8	NA	NA	NA	NA	NA	NA	NA	NA	NA	NA	NA	NA	NA	NA	AtRLP3|F20D23.5|F20D23_5|RESISTANCE TO FUSARIUM OXYSPORUM 2|RFO2|receptor like protein 3	0	0	0
AT1G17270	0	0	0	0	0	0	0	1	0	0	0	0	1	0	0	0	0	0	NA	NA	NA	NA	NA	NA	NA	228.3	NA	NA	NA	NA	57	NA	NA	NA	NA	NA	F20D23.3|F20D23_3	0	0	0
AT1G17277	0	0	0	0	0	0	0	1	0	0	0	0	0	0	0	0	0	0	NA	NA	NA	NA	NA	NA	NA	41.5	NA	NA	NA	NA	NA	NA	NA	NA	NA	NA	-	0	0	0
AT1G17290	0	1	1	1	1	1	0	0	0	0	1	0	0	0	0	0	0	1	NA	183.5	256.9	260.2	107.7	108.4	NA	NA	NA	NA	151.9	NA	NA	NA	NA	NA	NA	201.9	ALANINE AMINOTRANSFERAS|T13M22.3|T13M22_3|alanine aminotransferas	0	0	0
AT1G17300	0	0	0	0	0	0	0	1	0	0	0	0	0	0	0	0	0	0	NA	NA	NA	NA	NA	NA	NA	159.6	NA	NA	NA	NA	NA	NA	NA	NA	NA	NA	T13M22.4|T13M22_4	0	0	1
AT1G17310	0	0	0	0	0	0	0	1	0	0	0	0	0	0	0	0	0	0	NA	NA	NA	NA	NA	NA	NA	141.6	NA	NA	NA	NA	NA	NA	NA	NA	NA	NA	T13M22.2|T13M22_2	0	0	0
AT1G17340	0	0	1	1	1	1	0	1	0	0	0	0	0	0	0	0	0	1	NA	NA	366.9	368.5	150.8	113.7	NA	131.6	NA	NA	NA	NA	NA	NA	NA	NA	NA	187.1	F28G4.21|F28G4_21|SAC5|suppressor of actin 5	0	0	0
AT1G17345	1	0	1	1	1	1	1	0	0	0	1	1	0	0	0	0	0	1	132.6	NA	239.1	250.4	126.4	129.8	84.6	NA	NA	NA	143.5	153.3	NA	NA	NA	NA	NA	156.6	SAUR77|SMALL AUXIN UPREGULATED RNA 77	1	0	0
AT1G17350	0	0	0	0	0	0	0	1	0	0	0	0	0	0	0	0	0	0	NA	NA	NA	NA	NA	NA	NA	668.1	NA	NA	NA	NA	NA	NA	NA	NA	NA	NA	F28G4.20|F28G4_20	1	0	0
AT1G17360	1	1	1	1	0	0	0	1	0	0	1	1	0	0	0	0	1	1	125.6	178.6	231.7	205.4	NA	NA	NA	203.3	NA	NA	180.9	165.9	NA	NA	NA	NA	158	225.5	F28G4.18|F28G4_18	0	0	0
AT1G17370	0	0	0	0	0	0	1	1	0	0	1	1	0	0	0	0	0	0	NA	NA	NA	NA	NA	NA	64.9	96.2	NA	NA	157.5	179.8	NA	NA	NA	NA	NA	NA	F28G4.17|oligouridylate binding protein 1B	0	0	0
AT1G17380	0	1	1	1	1	0	1	0	0	0	1	1	0	0	0	0	1	1	NA	154.6	163.7	151.9	88.1	NA	68.9	NA	NA	NA	157	155	NA	NA	NA	NA	113.6	123	F28G4.16|TIFY11A|jasmonate-zim-domain protein 5	0	0	0
AT1G17390	0	0	0	0	0	0	0	1	0	0	0	0	0	0	0	0	0	0	NA	NA	NA	NA	NA	NA	NA	364.2	NA	NA	NA	NA	NA	NA	NA	NA	NA	NA	F28G4.15	0	0	0
AT1G17400	0	1	1	1	1	1	1	1	0	0	1	0	0	0	0	0	0	1	NA	110.1	384.6	312.5	278.9	213.7	57.1	174.3	NA	NA	111	NA	NA	NA	NA	NA	NA	219.3	F28G4.14|F28G4_14	0	0	0
AT1G17420	0	0	1	1	0	0	0	1	0	0	0	0	0	0	0	0	0	0	NA	NA	240.9	240.3	NA	NA	NA	116.4	NA	NA	NA	NA	NA	NA	NA	NA	NA	NA	ATLOX3|Arabidopsis thaliana lipoxygenase 3|F28G4.10|lipoxygenase 3	0	0	0
AT1G17440	0	1	1	1	0	0	0	0	0	0	0	0	0	0	0	0	0	1	NA	103	128.8	87.3	NA	NA	NA	NA	NA	NA	NA	NA	NA	NA	NA	NA	NA	69.9	CKH1|CYTOKININ-HYPERSENSITIVE 1|ENHANCED ETHYLENE RESPONSE 4|F1L3.13|TAF12B|TBP-ASSOCIATED FACTOR 12B	0	0	0
AT1G17450	0	0	0	0	0	0	1	0	0	0	0	0	0	0	0	0	0	0	NA	NA	NA	NA	NA	NA	82.6	NA	NA	NA	NA	NA	NA	NA	NA	NA	NA	NA	F28G4.7	0	0	0
AT1G17455	0	1	1	1	1	1	0	1	0	0	1	1	0	0	0	0	0	1	NA	112.6	97.4	102.7	104.9	79.6	NA	140.1	NA	NA	105.5	107.1	NA	NA	NA	NA	NA	88.8	ELF4-like 4	0	0	0
AT1G17460	0	0	0	0	0	0	0	1	0	0	0	0	0	0	0	0	0	0	NA	NA	NA	NA	NA	NA	NA	167.3	NA	NA	NA	NA	NA	NA	NA	NA	NA	NA	F28G4.5|TRF-like 3	0	0	0
AT1G17470	0	1	0	0	0	0	0	0	0	0	0	0	0	0	0	0	0	0	NA	78	NA	NA	NA	NA	NA	NA	NA	NA	NA	NA	NA	NA	NA	NA	NA	NA	ATDRG|ATDRG1|F28G4.4|developmentally regulated G-protein 1	0	0	0
AT1G17480	0	0	0	0	0	0	0	1	0	0	0	0	0	0	0	0	0	0	NA	NA	NA	NA	NA	NA	NA	78.7	NA	NA	NA	NA	NA	NA	NA	NA	NA	NA	F28G4.3|F28G4_3|IQ-domain 7	0	0	0
AT1G17490	0	1	1	0	0	0	0	0	0	0	0	1	0	0	0	0	0	0	NA	109.8	71.3	NA	NA	NA	NA	NA	NA	NA	NA	78.3	NA	NA	NA	NA	NA	NA	F28G4.23	0	0	0
AT1G17495	1	1	1	1	1	1	1	1	1	0	1	1	0	0	1	0	0	1	118.6	276.3	795.5	692.9	234.8	318.8	108.2	187.8	159.4	NA	228.3	218.8	NA	NA	109.8	NA	NA	579.6	F28G4.2	0	0	0
AT1G17500	1	0	0	0	0	1	0	0	0	0	0	0	0	0	0	0	1	0	131	NA	NA	NA	NA	147.5	NA	NA	NA	NA	NA	NA	NA	NA	NA	NA	344.6	NA	F1L3.21|F1L3_21	0	0	0
AT1G17530	0	1	0	0	0	0	0	1	0	0	0	0	0	0	0	0	0	0	NA	99.5	NA	NA	NA	NA	NA	116.1	NA	NA	NA	NA	NA	NA	NA	NA	NA	NA	ATTIM23-1|F11A6.23|translocase of inner mitochondrial membrane 23	0	0	0
AT1G17550	0	1	1	1	0	0	0	1	0	0	1	1	0	0	0	0	0	1	NA	139	178.5	171.3	NA	NA	NA	134.9	NA	NA	109.3	124.7	NA	NA	NA	NA	NA	115.8	AtHAB2|F1L3.38|homology to ABI2	0	0	0
AT1G17590	0	1	1	1	0	0	1	1	0	0	0	0	0	0	0	0	0	1	NA	72.3	61.6	56	NA	NA	64.9	145.9	NA	NA	NA	NA	NA	NA	NA	NA	NA	60.3	''nuclear factor Y|F1L3.29|F1L3_29|nuclear factor Y|subunit A8|subunit A8''	0	0	0
AT1G17620	1	1	1	1	1	1	1	0	0	0	1	1	0	0	0	0	0	1	108.5	148.2	403.6	364.3	267.2	228.8	238	NA	NA	NA	263.2	247.9	NA	NA	NA	NA	NA	260.5	F11A6.25	0	0	0
AT1G17630	0	0	1	1	0	0	0	0	0	0	0	0	0	0	0	0	1	0	NA	NA	256.5	234.5	NA	NA	NA	NA	NA	NA	NA	NA	NA	NA	NA	NA	170.6	NA	F11A6.24	0	0	0
AT1G17640	0	0	1	1	0	0	0	0	0	0	0	0	0	0	0	0	0	1	NA	NA	95.2	76.3	NA	NA	NA	NA	NA	NA	NA	NA	NA	NA	NA	NA	NA	78.8	F11A6.17	0	0	0
AT1G17660	0	1	0	0	0	0	0	0	0	0	1	1	0	0	0	0	0	0	NA	105.9	NA	NA	NA	NA	NA	NA	NA	NA	88.3	102.7	NA	NA	NA	NA	NA	NA	60124.TRNA-ASP-1	0	0	0
AT1G17670	0	0	1	0	0	0	0	0	0	0	0	0	0	0	0	0	0	0	NA	NA	58.5	NA	NA	NA	NA	NA	NA	NA	NA	NA	NA	NA	NA	NA	NA	NA	60124.TRNA-VAL-1	0	0	0
AT1G17690	0	0	1	0	0	0	0	1	0	0	0	0	0	0	0	0	0	0	NA	NA	72.5	NA	NA	NA	NA	241.3	NA	NA	NA	NA	NA	NA	NA	NA	NA	NA	F11A6.3|F11A6_3|nucleolar factor 1	0	0	0
AT1G17710	0	0	1	0	0	0	0	0	0	0	0	0	0	0	0	0	0	0	NA	NA	79.4	NA	NA	NA	NA	NA	NA	NA	NA	NA	NA	NA	NA	NA	NA	NA	Arabidopsis thaliana phosphoethanolamine/phosphocholine phosphatase 1|AtPEPC1|F11A6.5|F11A6_5|phosphoethanolamine/phosphocholine phosphatase 1	0	0	0
AT1G17720	0	0	1	1	1	1	1	1	0	0	0	1	0	0	0	0	0	1	NA	NA	167.7	164.1	119	100.7	98.4	111.1	NA	NA	NA	127.5	NA	NA	NA	NA	NA	149.8	F11A6.6|F11A6_6	0	0	0
AT1G17744	0	0	1	1	0	0	0	0	0	0	0	0	1	0	0	0	0	0	NA	NA	213.3	208.9	NA	NA	NA	NA	NA	NA	NA	NA	50.5	NA	NA	NA	NA	NA	-	0	0	0
AT1G17750	0	0	1	1	0	0	0	0	0	0	0	0	0	0	0	0	1	1	NA	NA	282.5	237.9	NA	NA	NA	NA	NA	NA	NA	NA	NA	NA	NA	NA	141.6	143.6	AtPEPR2|F11A6.9|F11A6_9|PEP1 RECEPTOR 2|PEP1 receptor 2	0	0	0
AT1G17760	0	1	1	0	0	0	0	1	0	0	0	0	1	0	0	0	0	0	NA	58.9	50.5	NA	NA	NA	NA	103.4	NA	NA	NA	NA	53.2	NA	NA	NA	NA	NA	ARABIDOPSIS THALIANA CLEAVAGE STIMULATION FACTOR 77|ATCSTF77|F11A6.10|F11A6_10	0	0	0
AT1G17780	0	0	0	0	0	0	0	1	0	0	0	0	0	0	0	0	0	0	NA	NA	NA	NA	NA	NA	NA	178.1	NA	NA	NA	NA	NA	NA	NA	NA	NA	NA	F2H15.22|F2H15_22	0	0	0
AT1G17830	0	0	1	1	1	1	0	1	0	0	0	1	0	0	0	0	0	0	NA	NA	167.6	154.8	131.3	135.4	NA	564	NA	NA	NA	169.7	NA	NA	NA	NA	NA	NA	F2H15.6|F2H15_6	0	0	1
AT1G17840	0	0	0	0	0	0	0	1	0	0	0	0	0	0	0	0	0	0	NA	NA	NA	NA	NA	NA	NA	251.5	NA	NA	NA	NA	NA	NA	NA	NA	NA	NA	ARABIDOPSIS THALIANA WHITE-BROWN COMPLEX HOMOLOG PROTEIN 11|ATP-binding cassette G11|ATWBC11|AtABCG11|COF1|CUTICULAR DEFECT AND ORGAN FUSION 1|DESPERADO|DSO|F2H15.7|F2H15_7|WBC11|white-brown complex homolog protein 11	0	0	0
AT1G17850	0	0	0	0	0	1	1	1	0	0	0	0	0	0	0	0	0	0	NA	NA	NA	NA	NA	155.2	88.5	106.9	NA	NA	NA	NA	NA	NA	NA	NA	NA	NA	F2H15.8|F2H15_8	0	0	0
AT1G17860	0	1	1	1	1	0	0	0	0	0	1	1	0	0	0	0	0	1	NA	177.2	350.6	294.2	201.2	NA	NA	NA	NA	NA	131.7	123.5	NA	NA	NA	NA	NA	160.7	F2H15.9|F2H15_9	0	0	0
AT1G17890	0	1	1	1	1	0	1	1	0	0	0	0	0	0	0	0	0	1	NA	160.9	256.6	287.4	89.5	NA	64.9	78.7	NA	NA	NA	NA	NA	NA	NA	NA	NA	103.2	F2H15.12|F2H15_12	0	0	0
AT1G17930	0	0	0	0	0	0	0	1	0	0	0	0	0	0	0	0	0	0	NA	NA	NA	NA	NA	NA	NA	88.4	NA	NA	NA	NA	NA	NA	NA	NA	NA	NA	F2H15.15|F2H15_15|MAIN|MAINTENANCE OF MERISTEMS	0	0	0
AT1G17940	1	1	1	1	1	1	1	0	1	1	1	1	0	0	0	0	1	1	127.1	145.4	451.1	363.2	212.9	219.8	135.7	NA	117.3	127.8	218.4	218.7	NA	NA	NA	NA	178.8	438.4	F2H15.16|F2H15_16	0	0	0
AT1G17950	0	0	0	0	0	0	0	1	0	0	0	0	0	0	0	0	0	0	NA	NA	NA	NA	NA	NA	NA	147.1	NA	NA	NA	NA	NA	NA	NA	NA	NA	NA	ATMYB52|BW52|F2H15.17|F2H15_17|MYB DOMAIN PROTEIN 52|myb domain protein 52	0	0	0
AT1G17970	0	0	0	0	0	0	0	0	0	0	0	0	1	0	0	0	0	0	NA	NA	NA	NA	NA	NA	NA	NA	NA	NA	NA	NA	52.8	NA	NA	NA	NA	NA	F2H15.19|F2H15_19	0	0	0
AT1G17980	1	0	1	1	0	0	0	0	0	0	0	1	0	0	0	0	0	0	42.6	NA	156.1	127.7	NA	NA	NA	NA	NA	NA	NA	125.7	NA	NA	NA	NA	NA	NA	F2H15.20|F2H15_20|poly(A) polymerase 1	0	0	0
AT1G17990	0	1	0	0	1	1	0	0	1	0	1	1	0	0	0	0	0	1	NA	222.7	NA	NA	144.6	138.5	NA	NA	104.4	NA	130.5	175.7	NA	NA	NA	NA	NA	322.5	T10F20.3	0	0	0
AT1G18020	0	1	0	0	1	1	0	0	0	0	1	1	0	0	0	0	0	1	NA	194.1	NA	NA	136.5	158	NA	NA	NA	NA	128.3	162	NA	NA	NA	NA	NA	318.1	-	0	0	0
AT1G18030	0	0	0	0	1	1	0	0	0	0	1	1	0	0	0	0	0	0	NA	NA	NA	NA	122.4	112.2	NA	NA	NA	NA	139.3	146.9	NA	NA	NA	NA	NA	NA	T10F20.4|T10F20_4	0	0	0
AT1G18060	0	0	0	0	0	0	0	0	0	0	0	0	0	0	0	0	0	1	NA	NA	NA	NA	NA	NA	NA	NA	NA	NA	NA	NA	NA	NA	NA	NA	NA	77.8	T10F20.7	0	0	0
AT1G18070	0	0	0	0	0	1	0	0	0	0	1	1	0	0	0	0	0	0	NA	NA	NA	NA	NA	105.5	NA	NA	NA	NA	243	197.1	NA	NA	NA	NA	NA	NA	T10F20.8	0	0	0
AT1G18075	0	1	1	1	1	0	1	0	0	0	0	0	0	0	0	0	1	1	NA	194.1	258.4	214.6	128.3	NA	104.3	NA	NA	NA	NA	NA	NA	NA	NA	NA	189.4	261.2	MICRORNA 159|MIR159|MIR159B|microRNA159B|p_MI0000218	0	0	0
AT1G18080	0	0	0	0	0	0	0	0	0	0	0	0	1	0	0	0	0	0	NA	NA	NA	NA	NA	NA	NA	NA	NA	NA	NA	NA	71	NA	NA	NA	NA	NA	RACK1A|RACK1A_AT|RECEPTOR FOR ACTIVATED C KINASE 1 A|T10F20.9|WD-40 REPEAT PROTEIN ATARCA	0	0	0
AT1G18100	0	0	0	0	1	1	0	1	0	0	0	0	0	0	0	0	0	0	NA	NA	NA	NA	83.2	118.5	NA	164.6	NA	NA	NA	NA	NA	NA	NA	NA	NA	NA	MFT|MOTHER OF FT AND TFL1|T10F20.11	0	0	1
AT1G18130	0	0	0	0	0	0	1	1	0	0	0	0	0	0	0	0	0	0	NA	NA	NA	NA	NA	NA	55.1	252	NA	NA	NA	NA	NA	NA	NA	NA	NA	NA	T10F20.13	0	0	0
AT1G18140	0	0	1	1	0	0	1	1	0	0	0	0	0	0	0	0	0	0	NA	NA	153.2	127.5	NA	NA	70.8	130.9	NA	NA	NA	NA	NA	NA	NA	NA	NA	NA	ATLAC1|T10F20.14|laccase 1	0	0	1
AT1G18160	0	0	1	1	0	0	0	1	0	0	0	0	0	0	0	0	0	0	NA	NA	115.5	118.3	NA	NA	NA	68.4	NA	NA	NA	NA	NA	NA	NA	NA	NA	NA	T10F20.16	0	0	0
AT1G18190	0	1	1	0	0	0	1	0	0	0	0	0	0	0	0	0	0	0	NA	104.8	79.9	NA	NA	NA	53.1	NA	NA	NA	NA	NA	NA	NA	NA	NA	NA	NA	T10F20.19|golgin candidate 2	0	0	0
AT1G18200	0	0	1	1	0	0	0	0	0	0	0	0	0	0	0	0	1	0	NA	NA	182.4	192.2	NA	NA	NA	NA	NA	NA	NA	NA	NA	NA	NA	NA	241.1	NA	AtRABA6b|RAB GTPase homolog A6B|T10F20.21	0	0	0
AT1G18220	0	0	0	0	0	0	0	1	0	0	0	0	0	0	0	0	0	0	NA	NA	NA	NA	NA	NA	NA	79.9	NA	NA	NA	NA	NA	NA	NA	NA	NA	NA	ATPUP9|T10F20.24|purine permease 9	0	0	0
AT1G18240	0	0	0	0	0	0	0	1	0	0	0	0	0	0	0	0	0	0	NA	NA	NA	NA	NA	NA	NA	55.7	NA	NA	NA	NA	NA	NA	NA	NA	NA	NA	T10F20.23	0	0	0
AT1G18250	0	0	0	0	0	0	0	1	0	0	0	0	0	0	0	0	0	0	NA	NA	NA	NA	NA	NA	NA	82.4	NA	NA	NA	NA	NA	NA	NA	NA	NA	NA	-	0	0	0
AT1G18265	0	0	0	0	0	0	0	1	0	0	0	0	0	0	0	0	0	0	NA	NA	NA	NA	NA	NA	NA	119.6	NA	NA	NA	NA	NA	NA	NA	NA	NA	NA	-	0	0	0
AT1G18290	0	0	0	0	0	0	0	1	0	0	0	0	0	0	0	0	0	0	NA	NA	NA	NA	NA	NA	NA	337.4	NA	NA	NA	NA	NA	NA	NA	NA	NA	NA	F15H18.19	0	0	0
AT1G18300	0	1	1	1	1	1	1	1	0	0	1	1	0	0	0	0	1	1	NA	219.5	483.6	407.8	350.1	373.4	104.3	272	NA	NA	203.8	182.8	NA	NA	NA	NA	131	395.2	F15H18.18|atnudt4|nudix hydrolase homolog 4	0	0	0
AT1G18330	1	1	1	1	1	1	1	0	1	0	1	1	0	0	0	0	0	1	99.2	169.7	231.2	196.6	145.4	136	177.1	NA	107.2	NA	225.7	191.9	NA	NA	NA	NA	NA	202.2	EARLY-PHYTOCHROME-RESPONSIVE1|F15H18.16|F15H18_16|REVEILLE 7|RVE7	0	0	1
AT1G18335	0	0	0	0	0	0	1	0	0	0	0	0	0	0	0	0	0	0	NA	NA	NA	NA	NA	NA	98.4	NA	NA	NA	NA	NA	NA	NA	NA	NA	NA	NA	-	0	0	0
AT1G18360	1	0	0	1	0	0	1	1	0	0	1	1	0	0	0	0	0	1	69.8	NA	NA	76.3	NA	NA	51.2	98.2	NA	NA	105.9	106.8	NA	NA	NA	NA	NA	77.5	F15H18.13|F15H18_13	0	0	0
AT1G18370	0	1	1	1	1	1	0	0	0	0	0	0	0	0	0	0	0	1	NA	163.4	327.2	252.9	120.8	111.2	NA	NA	NA	NA	NA	NA	NA	NA	NA	NA	NA	177.2	ARABIDOPSIS NPK1-ACTIVATING KINESIN 1|ATNACK1|F15H18.12|F15H18_12|HINKEL|NACK1|NPK1-ACTIVATING KINESIN 1	0	0	1
AT1G18382	0	0	1	1	0	0	0	0	0	0	0	0	0	0	0	0	0	0	NA	NA	271	259.5	NA	NA	NA	NA	NA	NA	NA	NA	NA	NA	NA	NA	NA	NA	-	0	0	0
AT1G18400	1	0	1	1	1	1	1	1	1	1	1	1	1	1	1	1	1	1	296.9	NA	405.9	377.4	239.1	324.5	395.4	235.3	258.2	352.4	400.6	406.6	96.8	285.5	294.6	188.4	273	436.6	BR enhanced expression 1|F15H18.11|F15H18_11	0	0	1
AT1G18410	0	1	1	1	1	1	0	0	0	0	0	0	0	0	0	0	0	1	NA	96	99.3	75.4	97.2	113.9	NA	NA	NA	NA	NA	NA	NA	NA	NA	NA	NA	95.6	F15H18.10|F15H18_10	0	0	0
AT1G18430	0	1	1	0	0	0	0	0	0	0	1	0	0	0	0	0	0	0	NA	112.6	90.9	NA	NA	NA	NA	NA	NA	NA	123.2	NA	NA	NA	NA	NA	NA	NA	51768.TRNA-ASP-1	0	0	0
AT1G18450	0	0	0	0	0	0	0	1	0	0	0	0	0	0	0	0	0	0	NA	NA	NA	NA	NA	NA	NA	97.2	NA	NA	NA	NA	NA	NA	NA	NA	NA	NA	ATARP4|F15H18.8|F15H18_8|actin-related protein 4	0	0	0
AT1G18460	1	1	1	1	1	1	1	0	1	0	1	1	0	1	0	0	0	1	169	96	128.6	120.6	94.9	119.5	202.6	NA	109.6	NA	294.2	278.8	NA	133.8	NA	NA	NA	120.6	F15H18.6|F15H18_6	0	0	0
AT1G18470	0	1	1	1	0	0	0	1	0	0	0	1	0	0	0	0	1	1	NA	141.2	153.8	146.7	NA	NA	NA	406.9	NA	NA	NA	142.5	NA	NA	NA	NA	175.9	152.9	F15H18.5|F15H18_5	0	0	0
AT1G18480	0	1	1	1	0	0	1	0	0	0	0	0	0	0	0	0	0	0	NA	132.3	124.9	130.5	NA	NA	88.5	NA	NA	NA	NA	NA	NA	NA	NA	NA	NA	NA	AtSLP2|F15H18.29|Shewenella-like protein phosphatase 2	0	0	1
AT1G18490	0	0	0	0	0	0	0	1	0	0	0	0	0	0	0	0	0	0	NA	NA	NA	NA	NA	NA	NA	1077.7	NA	NA	NA	NA	NA	NA	NA	NA	NA	NA	F15H18.26|F15H18_26|PCO3|plant cysteine oxidase 3	0	0	0
AT1G18500	0	1	1	0	0	0	0	0	0	0	0	0	0	0	0	0	0	0	NA	75.5	80.6	NA	NA	NA	NA	NA	NA	NA	NA	NA	NA	NA	NA	NA	NA	NA	F15H18.3|F15H18_3|IPMS1|ISOPROPYLMALATE SYNTHASE 1|methylthioalkylmalate synthase-like 4	0	0	0
AT1G18560	0	0	0	0	0	0	0	1	0	0	0	1	0	0	0	0	0	0	NA	NA	NA	NA	NA	NA	NA	350.2	NA	NA	NA	124.9	NA	NA	NA	NA	NA	NA	F25I16.10|F25I16_10	0	0	0
AT1G18570	0	0	1	1	0	0	1	0	0	0	0	0	0	0	0	0	0	1	NA	NA	291.8	269.6	NA	NA	110.2	NA	NA	NA	NA	NA	NA	NA	NA	NA	NA	209.4	AtMYB51|BW51A|BW51B|F25I16.9|F25I16_9|HIG1|HIGH INDOLIC GLUCOSINOLATE 1|myb domain protein 51	1	0	0
AT1G18580	0	0	0	0	0	0	0	1	0	0	0	0	0	0	0	0	1	0	NA	NA	NA	NA	NA	NA	NA	179.3	NA	NA	NA	NA	NA	NA	NA	NA	169.1	NA	F25I16.8|F25I16_8|galacturonosyltransferase 11	0	0	0
AT1G18600	0	0	0	0	0	1	0	0	0	0	0	0	0	0	0	0	0	0	NA	NA	NA	NA	NA	78.1	NA	NA	NA	NA	NA	NA	NA	NA	NA	NA	NA	NA	ARABIDOPSIS RHOMBOID-LIKE PROTEIN 12|ATRBL12|AtPARL|F25I16.6|F25I16_6|PARL|RHOMBOID-like protein 12|presenilins-associated rhomboid-like protein	0	0	0
AT1G18610	0	0	0	0	0	0	1	1	0	0	1	1	0	0	0	0	0	0	NA	NA	NA	NA	NA	NA	102.3	98.2	NA	NA	130.5	132.7	NA	NA	NA	NA	NA	NA	F25I16.5|F25I16_5	0	0	0
AT1G18620	0	0	0	0	0	0	0	0	0	0	1	1	0	0	0	0	0	0	NA	NA	NA	NA	NA	NA	NA	NA	NA	NA	138.4	132.8	NA	NA	NA	NA	NA	NA	F25I16.3|F25I16_3|TON1 Recruiting Motif 3	0	0	0
AT1G18640	1	1	1	1	1	1	1	1	0	0	1	1	0	0	0	0	0	1	114	144.3	106.3	86.6	78.1	106.3	76.7	129.1	NA	NA	170.9	165.7	NA	NA	NA	NA	NA	169.3	3-PHOSPHOSERINE PHOSPHATASE|3-phosphoserine phosphatase|PSP1|phosphoserine phosphatase 1	0	0	0
AT1G18660	0	0	0	0	0	0	0	1	0	0	0	0	0	0	0	0	0	0	NA	NA	NA	NA	NA	NA	NA	317.5	NA	NA	NA	NA	NA	NA	NA	NA	NA	NA	F6A14.25|F6A14_25	0	0	1
AT1G18670	0	1	1	1	1	1	1	0	0	0	1	1	0	0	0	0	1	1	NA	116.1	311.1	307.6	140	176.4	123.9	NA	NA	NA	161.8	144.3	NA	NA	NA	NA	148.4	259.8	F6A14.22|F6A14_22|IMPAIRED IN BABA-INDUCED STERILITY 1	0	0	1
AT1G18700	0	1	1	1	1	1	1	0	1	1	1	1	0	0	0	0	1	1	NA	173.6	147.1	129.9	100.2	100.3	72.8	NA	174.7	199.2	337.1	312.5	NA	NA	NA	NA	275.9	205.6	F6A14.19|F6A14_19	0	0	0
AT1G18710	1	0	1	1	1	1	1	1	1	0	1	1	1	1	0	0	0	1	128.7	NA	217.4	195.8	124.9	113.2	94.4	119.9	96.4	NA	255.6	235	58.5	113.5	NA	NA	NA	209.4	AtMYB47|F6A14.18|F6A14_18|myb domain protein 47	0	0	0
AT1G18720	0	0	1	1	1	1	1	0	0	0	0	0	0	0	0	0	0	1	NA	NA	281.5	263.3	157.2	148.3	114.1	NA	NA	NA	NA	NA	NA	NA	NA	NA	NA	292	F6A14.17|F6A14_17	0	0	0
AT1G18740	1	1	1	1	1	1	1	0	1	1	1	1	0	0	0	0	0	1	131.8	371.6	338.6	408.8	185.2	229.2	190.8	NA	160.6	177.2	439.1	404.2	NA	NA	NA	NA	NA	445.2	F6A14.15|F6A14_15	0	0	0
AT1G18750	0	0	0	0	0	0	0	1	0	0	0	0	0	0	0	0	0	0	NA	NA	NA	NA	NA	NA	NA	269.7	NA	NA	NA	NA	NA	NA	NA	NA	NA	NA	AGAMOUS-like 65|F6A14.14|F6A14_14	0	0	0
AT1G18800	0	0	1	1	0	0	0	0	0	0	0	0	0	0	0	0	1	1	NA	NA	118.3	97	NA	NA	NA	NA	NA	NA	NA	NA	NA	NA	NA	NA	225.2	179.9	F6A14.10|F6A14_10|NAP1-related protein 2	0	0	1
AT1G18810	0	0	0	0	0	0	0	1	0	0	0	0	0	0	0	0	0	0	NA	NA	NA	NA	NA	NA	NA	127.4	NA	NA	NA	NA	NA	NA	NA	NA	NA	NA	F6A14.9|F6A14_9	0	0	0
AT1G18830	0	0	1	0	0	0	0	1	0	0	0	0	0	0	0	0	1	0	NA	NA	59.5	NA	NA	NA	NA	245.8	NA	NA	NA	NA	NA	NA	NA	NA	172.5	NA	F6A14.8|F6A14_8|SEC31A	0	0	0
AT1G18835	1	0	1	1	1	1	1	0	0	0	1	1	0	0	0	0	0	1	181.4	NA	243.6	207.3	157.2	123.5	125.9	NA	NA	NA	169.9	137.3	NA	NA	NA	NA	NA	259.8	mini zinc finger|mini zinc finger 3	0	0	0
AT1G18840	0	0	0	0	0	0	0	1	0	0	0	0	0	0	0	0	0	0	NA	NA	NA	NA	NA	NA	NA	1163.9	NA	NA	NA	NA	NA	NA	NA	NA	NA	NA	F6A14.7|F6A14_7|IQ-domain 30	0	0	0
AT1G18850	0	0	0	0	0	1	0	0	0	0	0	0	0	0	0	0	0	0	NA	NA	NA	NA	NA	121	NA	NA	NA	NA	NA	NA	NA	NA	NA	NA	NA	NA	F6A14.6|F6A14_6	0	0	1
AT1G18860	0	0	1	1	0	1	0	0	0	0	0	0	0	0	0	0	0	0	NA	NA	289.1	299.8	NA	111.2	NA	NA	NA	NA	NA	NA	NA	NA	NA	NA	NA	NA	ATWRKY61|F6A14.5|F6A14_5|WRKY DNA-BINDING PROTEIN 61|WRKY DNA-binding protein 61	0	0	0
AT1G18870	1	0	1	1	1	1	1	1	1	0	1	1	0	1	1	0	0	1	135.7	NA	233.9	205.2	205.5	127.3	222.3	109.6	92.4	NA	235.4	221.5	NA	104.2	90.2	NA	NA	182.7	ARABIDOPSIS ISOCHORISMATE SYNTHASE 2|ATICS2|F6A14.3|F6A14_3|isochorismate synthase 2	0	0	0
AT1G18900	0	1	1	1	1	0	1	0	0	0	1	1	0	0	0	0	0	1	NA	162.3	243.3	237.7	100.8	NA	59	NA	NA	NA	153.6	139	NA	NA	NA	NA	NA	149.1	F14D16.2|F14D16_2	0	0	0
AT1G18910	0	1	1	1	1	1	1	1	0	0	1	1	0	0	1	0	1	1	NA	78.3	121.2	150.2	75.3	67.3	41.3	139.9	NA	NA	132	112.5	NA	NA	63.6	NA	47.8	105.9	F14D16.31|F14D16_31	0	0	0
AT1G18940	0	1	1	1	0	0	1	1	0	0	1	0	0	0	0	0	0	0	NA	74.1	61.4	64.7	NA	NA	49.2	165.8	NA	NA	75.6	NA	NA	NA	NA	NA	NA	NA	F14D16.8|F14D16_8	0	0	0
AT1G18950	0	1	0	0	0	0	0	0	0	0	0	0	0	0	0	0	0	0	NA	72	NA	NA	NA	NA	NA	NA	NA	NA	NA	NA	NA	NA	NA	NA	NA	NA	F14D16.10|F14D16_10	0	0	0
AT1G18960	0	0	0	0	0	0	1	1	0	0	0	0	0	0	0	0	0	0	NA	NA	NA	NA	NA	NA	47.2	95.2	NA	NA	NA	NA	NA	NA	NA	NA	NA	NA	F14D16.11|F14D16_11	0	0	0
AT1G18970	0	0	0	0	0	0	1	0	0	0	0	0	0	0	0	0	0	0	NA	NA	NA	NA	NA	NA	90.5	NA	NA	NA	NA	NA	NA	NA	NA	NA	NA	NA	F14D16.12|F14D16_12|germin-like protein 4	0	0	0
AT1G18980	0	0	1	1	0	0	0	0	0	0	0	0	0	0	0	0	0	0	NA	NA	214.3	170.9	NA	NA	NA	NA	NA	NA	NA	NA	NA	NA	NA	NA	NA	NA	F14D16.13|F14D16_13	0	0	0
AT1G18990	0	0	1	1	1	1	1	0	0	0	1	1	1	0	0	0	0	1	NA	NA	214.5	222.8	131.2	124.1	118	NA	NA	NA	225.5	235.3	53.9	NA	NA	NA	NA	206	F14D16.14|F14D16_14	0	0	0
AT1G19000	0	0	0	1	0	0	0	1	0	0	0	0	0	0	0	0	0	1	NA	NA	NA	194.6	NA	NA	NA	208.1	NA	NA	NA	NA	NA	NA	NA	NA	NA	208.7	F14D16.15|F14D16_15	0	0	0
AT1G19020	0	0	1	1	0	0	1	1	0	0	0	0	1	0	0	0	0	1	NA	NA	188.2	173.1	NA	NA	61	134.9	NA	NA	NA	NA	41.8	NA	NA	NA	NA	138.1	F14D16.17|F14D16_17	0	0	1
AT1G19030	0	0	1	1	0	0	0	1	0	0	0	0	1	0	0	0	0	0	NA	NA	107.1	112.2	NA	NA	NA	72.9	NA	NA	NA	NA	46	NA	NA	NA	NA	NA	F14D16.18|F14D16_18	0	0	0
AT1G19050	1	1	1	1	1	1	1	0	1	1	1	1	1	1	1	0	0	1	247.3	344.4	349.8	383.9	243.2	311.7	74.8	NA	161	141.2	244.7	198.4	71.8	132.2	144.4	NA	NA	512.7	F14D16.20|F14D16_20|response regulator 7	0	0	0
AT1G19060	0	0	0	0	0	0	0	1	0	0	0	0	0	0	0	0	0	0	NA	NA	NA	NA	NA	NA	NA	201.1	NA	NA	NA	NA	NA	NA	NA	NA	NA	NA	F14D16.21|F14D16_21	0	0	0
AT1G19100	0	1	0	0	0	0	0	0	0	0	0	0	0	0	0	0	0	0	NA	53.6	NA	NA	NA	NA	NA	NA	NA	NA	NA	NA	NA	NA	NA	NA	NA	NA	AtMORC6|DEFECTIVE IN MERISTEM SILENCING 11|F14D16.25|F14D16_25|MORC6|Microrchidia 6	0	0	0
AT1G19110	1	1	1	1	1	1	1	1	1	0	1	1	0	0	0	0	0	1	102.3	248.1	325.1	340.6	171.4	181.6	145.6	139.1	94	NA	206.3	217	NA	NA	NA	NA	NA	274.9	F14D16.26|F14D16_26	0	0	1
AT1G19115	0	0	0	0	0	0	0	0	0	0	0	0	0	0	0	0	1	0	NA	NA	NA	NA	NA	NA	NA	NA	NA	NA	NA	NA	NA	NA	NA	NA	132.9	NA	-	0	0	0
AT1G19170	0	0	0	0	0	0	0	1	0	0	0	0	0	0	0	0	0	0	NA	NA	NA	NA	NA	NA	NA	100.9	NA	NA	NA	NA	NA	NA	NA	NA	NA	NA	T29M8.4|T29M8_4	0	0	0
AT1G19180	1	0	1	1	1	1	1	0	0	0	1	1	0	0	0	0	1	1	129.5	NA	299.2	308.3	279.3	237.1	192.8	NA	NA	NA	299.1	311.9	NA	NA	NA	NA	351.8	283.8	AtJAZ1|T29M8.5|T29M8_5|TIFY10A|jasmonate-zim-domain protein 1	0	0	0
AT1G19210	0	1	1	1	1	1	1	1	0	0	1	1	0	0	0	0	0	1	NA	215.6	530.2	522.7	295.4	299	98.4	90.2	NA	NA	173.9	179	NA	NA	NA	NA	NA	526.4	T29M8.8|T29M8_8	0	0	0
AT1G19220	0	0	1	1	1	1	1	1	0	0	0	0	1	1	1	0	0	1	NA	NA	192	182.9	149.1	167.8	84.6	232	NA	NA	NA	NA	76.3	191.4	91.9	NA	NA	110.7	ARF11|AUXIN RESPONSE FACTOR11|IAA22|T29M8.9|T29M8_9|auxin response factor 19|indole-3-acetic acid inducible 22	1	0	1
AT1G19230	0	0	1	1	1	1	1	0	0	0	1	0	0	0	1	0	0	1	NA	NA	363.3	370.8	198.1	134.3	100.3	NA	NA	NA	134.7	NA	NA	NA	104.5	NA	NA	147.7	T29M8.10|T29M8_10	0	0	1
AT1G19240	0	0	0	0	0	0	0	1	0	0	0	0	1	0	0	0	0	0	NA	NA	NA	NA	NA	NA	NA	131.6	NA	NA	NA	NA	61.9	NA	NA	NA	NA	NA	T29M8.11|T29M8_11	0	0	0
AT1G19250	0	1	1	1	1	0	0	0	0	0	1	0	0	0	0	0	0	1	NA	85.8	265.5	252.1	82.4	NA	NA	NA	NA	NA	93.3	NA	NA	NA	NA	NA	NA	194.3	T29M8.12|T29M8_12|flavin-dependent monooxygenase 1	0	0	1
AT1G19260	0	0	0	0	0	0	0	1	0	0	0	0	0	0	0	0	0	0	NA	NA	NA	NA	NA	NA	NA	66.9	NA	NA	NA	NA	NA	NA	NA	NA	NA	NA	T29M8.13|T29M8_13	0	0	0
AT1G19270	0	1	1	1	0	0	0	1	0	0	0	0	0	0	0	0	0	1	NA	85.4	123.4	123.1	NA	NA	NA	182.3	NA	NA	NA	NA	NA	NA	NA	NA	NA	92.2	DA (large in Chinese) 1|T29M8.14|T29M8_14	0	0	0
AT1G19300	0	0	0	0	0	0	1	1	0	0	0	1	0	0	0	0	0	0	NA	NA	NA	NA	NA	NA	216.4	107.6	NA	NA	NA	185	NA	NA	NA	NA	NA	NA	ATGATL1|F18O14.2|F18O14_2|GALACTURONOSYLTRANSFERASE-LIKE 1|GAOLAOZHUANGREN 1|GATL1|GLZ1	0	0	0
AT1G19310	0	1	1	1	1	1	1	1	0	0	1	1	0	0	0	0	1	1	NA	194.8	207.8	259.8	134.4	117.2	112.1	393.6	NA	NA	219	189.9	NA	NA	NA	NA	428.2	247.5	F18O14.3|F18O14_3	0	0	0
AT1G19330	0	1	1	1	1	1	0	0	0	0	1	0	0	0	0	0	0	1	NA	203.3	231.1	230.5	164.3	167.6	NA	NA	NA	NA	196.4	NA	NA	NA	NA	NA	NA	243.3	F18O14.5|F18O14_5	0	0	1
AT1G19340	0	0	0	0	0	1	0	0	0	0	0	0	0	0	0	0	0	0	NA	NA	NA	NA	NA	128.1	NA	NA	NA	NA	NA	NA	NA	NA	NA	NA	NA	NA	F18O14.6|F18O14_6	0	0	0
AT1G19350	0	0	1	1	1	0	1	0	0	0	0	0	0	0	0	0	0	1	NA	NA	208.9	205.1	136.8	NA	232.1	NA	NA	NA	NA	NA	NA	NA	NA	NA	NA	208.4	107 PROTEIN|BRASSINAZOLE-RESISTANT 2|BRI1-EMS-SUPPRESSOR 1|BZR2|F18O14.7|F18O14_7	0	0	0
AT1G19360	0	0	0	1	0	0	0	1	0	0	0	0	0	0	0	0	0	0	NA	NA	NA	138.9	NA	NA	NA	169.3	NA	NA	NA	NA	NA	NA	NA	NA	NA	NA	F18O14.8|F18O14_8|reduced residual arabinose 3	0	0	0
AT1G19380	0	1	1	1	0	0	1	1	0	0	0	0	0	0	0	0	0	1	NA	176.4	176.6	166.4	NA	NA	68.9	126.1	NA	NA	NA	NA	NA	NA	NA	NA	NA	128.9	F18O14.10|F18O14_10	0	0	0
AT1G19390	0	0	0	0	0	0	0	1	0	0	0	0	0	0	0	0	0	0	NA	NA	NA	NA	NA	NA	NA	198.1	NA	NA	NA	NA	NA	NA	NA	NA	NA	NA	F18O14.11|F18O14_11	0	0	0
AT1G19397	0	0	0	0	0	0	1	0	0	0	1	1	0	0	0	0	0	0	NA	NA	NA	NA	NA	NA	82.6	NA	NA	NA	232.9	213.1	NA	NA	NA	NA	NA	NA	-	0	0	0
AT1G19400	1	0	1	1	1	0	1	1	0	0	1	0	0	0	0	0	1	1	101.6	NA	201.1	187.6	110	NA	80.7	191.6	NA	NA	152.8	NA	NA	NA	NA	NA	110.7	163.1	F18O14.16|F18O14_16	0	0	0
AT1G19410	0	0	0	0	0	0	0	0	0	0	0	0	1	0	0	0	0	0	NA	NA	NA	NA	NA	NA	NA	NA	NA	NA	NA	NA	47.5	NA	NA	NA	NA	NA	F18O14.17|F18O14_17	0	0	0
AT1G19420	0	0	0	0	0	0	0	1	0	0	0	0	0	0	0	0	0	0	NA	NA	NA	NA	NA	NA	NA	180.8	NA	NA	NA	NA	NA	NA	NA	NA	NA	NA	F18O14.39	0	0	0
AT1G19440	0	0	0	0	0	1	0	0	0	0	0	0	0	0	0	0	1	1	NA	NA	NA	NA	NA	98.6	NA	NA	NA	NA	NA	NA	NA	NA	NA	NA	174	111.7	3-ketoacyl-CoA synthase 4|F18O14.21|F18O14_21	0	0	1
AT1G19450	0	0	1	1	0	0	0	1	0	0	0	0	0	0	0	0	0	0	NA	NA	176.7	154	NA	NA	NA	384.4	NA	NA	NA	NA	NA	NA	NA	NA	NA	NA	F18O14.22|F18O14_22	0	0	1
AT1G19460	1	1	1	1	1	1	1	0	1	0	1	1	0	0	0	0	1	1	155	182.8	380.5	410.7	259.2	292.5	125.9	NA	130.1	NA	257	228.8	NA	NA	NA	NA	109.2	290.6	F18O14.24|F18O14_24	0	0	0
AT1G19480	0	0	0	0	0	0	0	0	0	0	0	0	1	0	0	0	0	0	NA	NA	NA	NA	NA	NA	NA	NA	NA	NA	NA	NA	64.2	NA	NA	NA	NA	NA	F18O14.25|F18O14_25	0	0	0
AT1G19485	0	1	1	0	0	0	1	1	0	0	0	0	0	0	0	0	0	1	NA	115.8	74.4	NA	NA	NA	116.1	141.6	NA	NA	NA	NA	NA	NA	NA	NA	NA	61.3	-	0	0	0
AT1G19490	1	1	1	1	1	1	1	0	0	0	1	1	0	0	0	0	1	1	81.4	212.4	153.1	200.6	83.8	100.9	90.5	NA	NA	NA	178.5	197.6	NA	NA	NA	NA	281.7	129.6	F18O14.41	0	0	0
AT1G19520	0	1	0	0	0	0	0	1	0	0	0	0	0	0	0	0	0	0	NA	93.2	NA	NA	NA	NA	NA	85.9	NA	NA	NA	NA	NA	NA	NA	NA	NA	NA	F18O14.40|NUCLEAR FUSION DEFECTIVE 5	0	0	0
AT1G19530	0	0	1	1	0	0	0	1	0	0	1	1	0	0	0	0	0	0	NA	NA	148	155.2	NA	NA	NA	91.9	NA	NA	175.6	152.8	NA	NA	NA	NA	NA	NA	F18O14.29|F18O14_29	0	0	0
AT1G19540	0	0	1	1	1	1	1	0	0	0	0	1	0	0	0	0	0	1	NA	NA	187.6	184.6	113.4	111.4	120	NA	NA	NA	NA	125	NA	NA	NA	NA	NA	113.8	F18O14.30|F18O14_30	0	0	1
AT1G19570	0	1	1	1	1	1	1	0	0	0	1	1	0	0	0	0	0	1	NA	92.5	113.2	130.5	108.4	136.2	70.8	NA	NA	NA	167.5	155.8	NA	NA	NA	NA	NA	161.4	ATDHAR1|DEHYDROASCORBATE REDUCTASE 5|DHAR5|F14P1.9|F14P1_9|dehydroascorbate reductase	0	0	0
AT1G19610	0	0	0	0	0	0	0	1	0	0	0	0	0	0	0	0	0	1	NA	NA	NA	NA	NA	NA	NA	126.9	NA	NA	NA	NA	NA	NA	NA	NA	NA	79.5	F14P1.6|F14P1_6|LCR78|LOW-MOLECULAR-WEIGHT CYSTEINE-RICH 78	0	0	0
AT1G19620	0	0	0	0	0	0	0	1	0	0	0	0	0	0	0	0	0	0	NA	NA	NA	NA	NA	NA	NA	140.1	NA	NA	NA	NA	NA	NA	NA	NA	NA	NA	F14P1.5	0	0	0
AT1G19630	0	0	1	1	0	1	0	0	1	0	1	1	0	0	1	0	0	0	NA	NA	125.4	143.8	NA	89.6	NA	NA	96.4	NA	114.7	143.3	NA	NA	80.8	NA	NA	NA	''cytochrome P450|F14P1.4|F14P1_4|cytochrome P450|family 722|polypeptide 1|polypeptide 1''|subfamily A	0	0	0
AT1G19640	0	1	0	0	0	0	0	1	0	0	0	0	0	0	0	0	1	1	NA	101.3	NA	NA	NA	NA	NA	165.8	NA	NA	NA	NA	NA	NA	NA	NA	135.3	135.4	F14P1.3|F14P1_3|jasmonic acid carboxyl methyltransferase	0	0	0
AT1G19650	0	0	0	0	0	0	1	0	0	0	0	0	0	0	0	0	0	0	NA	NA	NA	NA	NA	NA	74.8	NA	NA	NA	NA	NA	NA	NA	NA	NA	NA	NA	F14P1.2|F14P1_2	0	0	0
AT1G19660	0	1	1	1	1	1	1	1	0	0	1	1	0	0	0	0	1	1	NA	304.6	221.2	208.6	129.3	109.9	90.5	367.7	NA	NA	279.1	235.2	NA	NA	NA	NA	230.5	526.1	AtBBD2|BBD2|F14P1.1|F14P1_1|bifunctional nuclease in basal defense response 2	0	0	0
AT1G19690	0	0	0	0	0	0	0	1	0	0	0	0	0	0	0	0	0	0	NA	NA	NA	NA	NA	NA	NA	119.4	NA	NA	NA	NA	NA	NA	NA	NA	NA	NA	F14P1.35|F14P1_35	0	0	0
AT1G19700	0	0	1	1	0	0	0	0	0	0	0	0	0	0	0	0	0	0	NA	NA	136	153.3	NA	NA	NA	NA	NA	NA	NA	NA	NA	NA	NA	NA	NA	NA	BEL1-LIKE HOMEODOMAIN 10|BEL1-like homeodomain 10|BLH10|F14P1.20|F14P1_20	0	0	1
AT1G19710	0	0	0	0	0	0	0	1	0	0	0	0	0	0	0	0	1	0	NA	NA	NA	NA	NA	NA	NA	196.6	NA	NA	NA	NA	NA	NA	NA	NA	193.3	NA	F14P1.19|F14P1_19	0	0	0
AT1G19715	0	0	0	0	0	0	0	1	0	0	0	0	0	0	0	0	0	0	NA	NA	NA	NA	NA	NA	NA	233.8	NA	NA	NA	NA	NA	NA	NA	NA	NA	NA	-	0	0	0
AT1G19730	0	0	0	1	0	0	0	0	0	0	0	0	0	0	0	0	0	0	NA	NA	NA	67	NA	NA	NA	NA	NA	NA	NA	NA	NA	NA	NA	NA	NA	NA	ATH4|F14P1.32|F14P1_32|THIOREDOXIN|thioredoxin H-type 4	0	0	0
AT1G19740	0	0	1	0	0	0	0	0	0	0	0	0	0	0	0	0	0	0	NA	NA	68	NA	NA	NA	NA	NA	NA	NA	NA	NA	NA	NA	NA	NA	NA	NA	F14P1.10|F14P1_10	0	0	0
AT1G19750	0	0	0	0	0	0	0	1	0	0	0	0	0	0	0	0	1	0	NA	NA	NA	NA	NA	NA	NA	134.4	NA	NA	NA	NA	NA	NA	NA	NA	175.9	NA	F14P1.15|F14P1_15	0	0	0
AT1G19770	0	1	1	1	1	1	1	1	1	0	1	1	1	0	0	0	0	1	NA	153.5	394.8	342.2	181.4	217.5	116.1	197.8	134.1	NA	253.7	206.9	52.8	NA	NA	NA	NA	213.9	ATPUP14|F14P1.13|F14P1_13|purine permease 14	0	0	0
AT1G19790	0	0	1	1	0	0	0	1	0	0	0	0	0	0	0	0	0	0	NA	NA	114.4	91.1	NA	NA	NA	222.3	NA	NA	NA	NA	NA	NA	NA	NA	NA	NA	F14P1.22|F14P1_22|SHI-related sequence 7	1	0	0
AT1G19800	0	1	0	0	0	1	1	0	0	0	0	0	0	0	0	0	1	0	NA	114.3	NA	NA	NA	88.8	86.6	NA	NA	NA	NA	NA	NA	NA	NA	NA	160	NA	ATP-binding cassette I14|F14P1.27|F14P1_27|TGD1|trigalactosyldiacylglycerol 1	0	0	0
AT1G19830	0	0	0	0	0	0	0	1	0	0	0	0	0	0	0	0	0	0	NA	NA	NA	NA	NA	NA	NA	338.7	NA	NA	NA	NA	NA	NA	NA	NA	NA	NA	F14P1.18|F14P1_18|SAUR54|SMALL AUXIN UPREGULATED RNA 54	1	0	0
AT1G19835	0	0	0	0	0	0	1	1	1	0	1	1	1	0	0	0	0	0	NA	NA	NA	NA	NA	NA	125.9	144.1	85.5	NA	367.8	332.1	58.5	NA	NA	NA	NA	NA	F14P1.24|F14P1_24	0	0	1
AT1G19850	1	0	0	0	0	1	0	1	0	0	1	1	0	0	0	0	0	0	152.7	NA	NA	NA	NA	125	NA	143.9	NA	NA	310.6	295.7	NA	NA	NA	NA	NA	NA	ARF5|AUXIN RESPONSE FACTOR 5|F6F9.10|F6F9_10|IAA24|MONOPTEROS|TRANSCRIPTION FACTOR IAA24|indole-3-acetic acid inducible 24	1	0	0
AT1G19860	0	1	1	1	0	0	0	0	0	0	0	0	0	0	0	0	0	0	NA	132	136.2	135.7	NA	NA	NA	NA	NA	NA	NA	NA	NA	NA	NA	NA	NA	NA	F6F9.9|F6F9_9	0	0	0
AT1G19870	1	1	1	1	1	1	1	1	0	0	1	1	0	0	0	0	0	1	178.3	239.6	398.6	421.2	168.1	122.7	114.1	348.7	NA	NA	170.8	181.5	NA	NA	NA	NA	NA	280	F6F9.8|F6F9_8|IQ-domain 32|IQD32	0	0	0
AT1G19890	0	0	0	0	0	0	1	1	0	0	0	0	0	0	0	0	0	0	NA	NA	NA	NA	NA	NA	74.8	112.1	NA	NA	NA	NA	NA	NA	NA	NA	NA	NA	ATMGH3|F6F9.5|F6F9_5|MALE-GAMETE-SPECIFIC HISTONE H3|male-gamete-specific histone H3	0	0	0
AT1G19910	0	0	1	1	1	1	1	0	0	0	0	0	0	0	0	0	0	1	NA	NA	201.2	143.7	170.4	119.5	82.6	NA	NA	NA	NA	NA	NA	NA	NA	NA	NA	115.5	ATVHA-C2|AVA-2PE|F6F9.3|F6F9_3|VACUOLAR H+-PUMPING ATPASE 16 KDA PROTEOLIPID|VACUOLAR-TYPE H+ ATPASE C2	0	0	0
AT1G19920	0	0	0	0	0	0	0	0	0	0	0	0	0	0	0	0	0	1	NA	NA	NA	NA	NA	NA	NA	NA	NA	NA	NA	NA	NA	NA	NA	NA	NA	99.1	ASA1|ATP SULFURYLASE ARABIDOPSIS 1|ATP SULFURYLASE PRECURSOR|F6F9.2|F6F9_2	0	0	0
AT1G19940	0	0	1	0	0	0	0	1	0	0	0	0	0	0	0	0	0	0	NA	NA	93.5	NA	NA	NA	NA	310.2	NA	NA	NA	NA	NA	NA	NA	NA	NA	NA	AtGH9B5|F6F9.1|F6F9_1|glycosyl hydrolase 9B5	0	0	0
AT1G19950	0	1	0	0	0	0	0	0	0	0	0	0	0	0	0	0	0	1	NA	127.7	NA	NA	NA	NA	NA	NA	NA	NA	NA	NA	NA	NA	NA	NA	NA	88.4	HVA22-like protein H (ATHVA22H)|T20H2.26|T20H2_26	0	0	0
AT1G19960	0	0	1	1	1	0	1	1	0	0	0	0	0	0	0	0	0	0	NA	NA	175.1	149.5	84.9	NA	53.1	82.2	NA	NA	NA	NA	NA	NA	NA	NA	NA	NA	T20H2.25|T20H2_25	0	0	1
AT1G19968	0	0	0	0	0	0	0	1	0	0	0	0	1	0	0	0	0	0	NA	NA	NA	NA	NA	NA	NA	84.9	NA	NA	NA	NA	39.5	NA	NA	NA	NA	NA	-	0	0	0
AT1G19970	0	0	0	1	0	0	0	0	0	0	0	0	0	0	0	0	0	1	NA	NA	NA	81.6	NA	NA	NA	NA	NA	NA	NA	NA	NA	NA	NA	NA	NA	87.4	T20H2.24|T20H2_24	0	0	0
AT1G19980	0	1	1	0	1	1	1	0	0	0	0	0	0	0	0	0	0	0	NA	102.7	83.2	NA	75.3	74	57.1	NA	NA	NA	NA	NA	NA	NA	NA	NA	NA	NA	T20H2.28|T20H2_28	0	0	0
AT1G20000	0	0	0	0	0	0	0	1	0	0	0	0	0	0	0	0	0	0	NA	NA	NA	NA	NA	NA	NA	198.6	NA	NA	NA	NA	NA	NA	NA	NA	NA	NA	T20H2.22|T20H2_22|TBP-associated factor 11B	0	0	0
AT1G20010	0	1	1	1	1	1	1	0	0	0	1	1	0	0	0	0	1	1	NA	193.4	220.3	267	194	171.7	106.2	NA	NA	NA	214.3	245.6	NA	NA	NA	NA	299.1	315.3	T20H2.21|T20H2_21|tubulin beta-5 chain	0	0	0
AT1G20020	1	0	0	0	0	0	1	0	0	0	0	0	0	0	0	0	0	0	258.2	NA	NA	NA	NA	NA	177.1	NA	NA	NA	NA	NA	NA	NA	NA	NA	NA	NA	ATLFNR2|FERREDOXIN:NADP(H) OXIDOREDUCTASE|LEAF FNR 2|LFNR2|T20H2.20|T20H2_20|ferredoxin-NADP(+)-oxidoreductase 2|leaf-type chloroplast-targeted FNR 2	0	0	0
AT1G20030	0	0	1	1	1	1	1	0	0	0	0	0	0	0	0	0	0	0	NA	NA	191.6	155.8	132.9	173.4	143.6	NA	NA	NA	NA	NA	NA	NA	NA	NA	NA	NA	T20H2.19|T20H2_19	0	0	0
AT1G20050	0	0	0	0	0	0	0	1	0	0	0	0	0	0	0	0	0	0	NA	NA	NA	NA	NA	NA	NA	187.1	NA	NA	NA	NA	NA	NA	NA	NA	NA	NA	HYDRA1|MAD4|miRNA action deficient 4	0	0	0
AT1G20070	0	1	1	1	1	1	0	0	1	0	1	1	0	0	0	0	0	1	NA	190.9	207.1	213.3	178	145.2	NA	NA	89.1	NA	252.2	257.1	NA	NA	NA	NA	NA	188.2	T20H2.15|T20H2_15	0	0	0
AT1G20090	0	0	1	1	0	0	0	0	0	0	0	0	0	0	0	0	0	1	NA	NA	236.5	240.7	NA	NA	NA	NA	NA	NA	NA	NA	NA	NA	NA	NA	NA	317.4	ARAC4|ATRAC4|ATROP2|Arabidopsis RAC-like 4|GTP-BINDING PROTEIN ARAC4|RHO-related protein from plants 2|T20H2.12|T20H2_12	0	0	1
AT1G20100	0	0	0	0	0	0	1	1	0	0	1	1	0	0	0	0	0	0	NA	NA	NA	NA	NA	NA	88.5	112.4	NA	NA	163.4	150.1	NA	NA	NA	NA	NA	NA	T20H2.11|T20H2_11	0	0	0
AT1G20110	0	1	1	1	1	0	0	0	0	0	0	0	0	0	0	0	0	1	NA	258.7	225.1	199.3	126.7	NA	NA	NA	NA	NA	NA	NA	NA	NA	NA	NA	NA	155.3	FYVE-domain protein 1|FYVE1|T20H2.10|T20H2_10	0	0	0
AT1G20130	0	0	0	0	0	0	0	1	0	0	0	0	0	0	0	0	0	0	NA	NA	NA	NA	NA	NA	NA	154.6	NA	NA	NA	NA	NA	NA	NA	NA	NA	NA	T20H2.9|T20H2_9	0	0	0
AT1G20140	0	0	0	0	0	0	0	0	1	0	0	0	1	0	0	0	0	0	NA	NA	NA	NA	NA	NA	NA	NA	53.8	NA	NA	NA	46.7	NA	NA	NA	NA	NA	ASK4|SKP1-like 4|T20H2.8|T20H2_8	0	0	0
AT1G20150	0	0	0	0	0	0	0	1	0	0	0	0	0	0	0	0	0	0	NA	NA	NA	NA	NA	NA	NA	117.4	NA	NA	NA	NA	NA	NA	NA	NA	NA	NA	T20H2.7|T20H2_7	0	0	0
AT1G20170	0	1	0	0	0	0	0	0	0	0	1	0	0	0	0	0	0	0	NA	81.5	NA	NA	NA	NA	NA	NA	NA	NA	75.6	NA	NA	NA	NA	NA	NA	NA	51902.TRNA-GLU-1	0	0	0
AT1G20180	0	0	0	0	0	0	0	1	0	0	0	0	0	0	0	0	0	0	NA	NA	NA	NA	NA	NA	NA	110.6	NA	NA	NA	NA	NA	NA	NA	NA	NA	NA	T20H2.5|T20H2_5	0	0	0
AT1G20250	0	0	0	0	0	0	1	0	0	0	0	0	0	0	0	0	0	0	NA	NA	NA	NA	NA	NA	64.9	NA	NA	NA	NA	NA	NA	NA	NA	NA	NA	NA	61418.TRNA-LYS-1	0	0	0
AT1G20260	0	1	1	1	0	0	0	0	0	0	0	0	0	0	0	0	0	0	NA	88.6	73.3	63.4	NA	NA	NA	NA	NA	NA	NA	NA	NA	NA	NA	NA	NA	NA	AtVAB3|F14O10.13|F14O10_13|V-ATPase B subunit 3|VHA-B3	0	0	0
AT1G20270	0	1	1	1	0	0	0	1	0	0	0	0	0	0	0	0	0	0	NA	83.6	64.8	69.8	NA	NA	NA	114.6	NA	NA	NA	NA	NA	NA	NA	NA	NA	NA	F14O10.12|F14O10_12	0	0	0
AT1G20280	0	0	0	0	0	0	0	1	0	1	0	0	0	0	0	0	0	0	NA	NA	NA	NA	NA	NA	NA	209.6	NA	119.1	NA	NA	NA	NA	NA	NA	NA	NA	F14O10.15|F14O10_15	0	0	0
AT1G20310	0	1	1	1	1	1	1	1	0	0	1	1	0	0	0	0	0	1	NA	223	661	595.7	174.6	148.8	57.1	104.7	NA	NA	136.4	119.6	NA	NA	NA	NA	NA	348.2	F14O10.9|F14O10_9	0	0	0
AT1G20330	1	1	1	1	1	1	1	1	1	0	1	1	0	0	0	0	1	1	185.3	285.8	230.9	237.7	147.2	165.3	131.8	122.9	116.9	NA	275.9	234.8	NA	NA	NA	NA	200.1	425.7	COTYLEDON VASCULAR PATTERN 1|CVP1|F14O10.7|F14O10_7|FRILL1|FRL1|sterol methyltransferase 2	0	0	0
AT1G20340	0	0	0	0	1	0	0	0	0	0	0	0	0	0	0	0	0	0	NA	NA	NA	NA	104.3	NA	NA	NA	NA	NA	NA	NA	NA	NA	NA	NA	NA	NA	DNA-DAMAGE-REPAIR/TOLERATION PROTEIN 112|F14O10.6|F14O10_6|PETE2|PLASTOCYANIN 2	0	0	0
AT1G20360	0	0	0	0	0	0	0	1	0	0	0	0	0	0	0	0	0	0	NA	NA	NA	NA	NA	NA	NA	85.9	NA	NA	NA	NA	NA	NA	NA	NA	NA	NA	F14O10.4|F14O10_4	0	0	0
AT1G20370	0	0	1	1	0	0	0	1	0	0	0	0	1	0	0	0	0	0	NA	NA	54.3	62.2	NA	NA	NA	81.9	NA	NA	NA	NA	48.2	NA	NA	NA	NA	NA	F14O10.3|F14O10_3	0	0	0
AT1G20380	0	0	0	0	0	0	0	1	0	0	0	0	0	0	0	0	0	0	NA	NA	NA	NA	NA	NA	NA	338.2	NA	NA	NA	NA	NA	NA	NA	NA	NA	NA	F14O10.2|F14O10_2	0	0	0
AT1G20390	0	1	1	0	0	0	0	0	0	0	0	0	0	0	0	0	0	0	NA	109.8	61.2	NA	NA	NA	NA	NA	NA	NA	NA	NA	NA	NA	NA	NA	NA	NA	F5M15.26|F5M15_26	0	0	0
AT1G20400	0	0	0	0	0	0	0	0	0	0	0	0	1	0	0	0	0	0	NA	NA	NA	NA	NA	NA	NA	NA	NA	NA	NA	NA	60	NA	NA	NA	NA	NA	F5M15.25|F5M15_25	0	0	0
AT1G20440	0	0	1	1	1	1	1	0	0	0	1	1	0	0	0	0	0	1	NA	NA	282.5	277.5	259.8	264.7	238	NA	NA	NA	289.8	308.3	NA	NA	NA	NA	NA	228.3	AtCOR47|F5M15.22|F5M15_22|RD17|cold-regulated 47	0	0	0
AT1G20450	0	0	0	0	1	1	0	1	0	0	0	0	0	0	0	0	1	0	NA	NA	NA	NA	160.3	143.6	NA	90.4	NA	NA	NA	NA	NA	NA	NA	NA	145.9	NA	EARLY RESPONSIVE TO DEHYDRATION 10|ER10|F5M15.21|F5M15_21|LOW TEMPERATURE INDUCED 29|LOW TEMPERATURE INDUCED 45|LTI29|LTI45	0	0	0
AT1G20460	0	0	1	1	0	0	0	0	0	0	0	0	0	0	0	0	0	0	NA	NA	241.4	219.5	NA	NA	NA	NA	NA	NA	NA	NA	NA	NA	NA	NA	NA	NA	F5M15.20|F5M15_20	0	0	0
AT1G20480	0	0	0	0	0	0	0	1	0	0	0	0	0	0	0	0	0	0	NA	NA	NA	NA	NA	NA	NA	91.4	NA	NA	NA	NA	NA	NA	NA	NA	NA	NA	F5M15.29|F5M15_29	0	0	0
AT1G20490	0	0	1	1	1	1	0	1	0	0	1	1	0	0	1	0	0	1	NA	NA	179.7	142.3	133.1	123.3	NA	195.1	NA	NA	148.8	121.8	NA	NA	109	NA	NA	103.2	F5M15.28|F5M15_28	0	0	0
AT1G20500	0	0	0	0	0	0	0	0	0	0	0	0	0	0	0	0	1	0	NA	NA	NA	NA	NA	NA	NA	NA	NA	NA	NA	NA	NA	NA	NA	NA	253.2	NA	F5M15.18|F5M15_18	0	0	0
AT1G20510	0	1	1	1	1	1	1	0	0	0	1	0	1	0	0	0	0	1	NA	151	220.5	164.8	96.1	104.7	76.7	NA	NA	NA	126.2	NA	63	NA	NA	NA	NA	137.4	F5M15.17|F5M15_17|OPC-8:0 CoA ligase1	0	0	0
AT1G20520	0	0	0	0	0	0	0	1	0	0	0	0	0	0	0	0	0	0	NA	NA	NA	NA	NA	NA	NA	294	NA	NA	NA	NA	NA	NA	NA	NA	NA	NA	F5M15.16|F5M15_16	0	0	0
AT1G20560	0	1	1	1	0	0	0	1	0	0	1	0	1	0	0	0	0	1	NA	74.5	82.2	93.2	NA	NA	NA	604.7	NA	NA	85.4	NA	48.2	NA	NA	NA	NA	110.4	F5M15.12|F5M15_12|acyl activating enzyme 1	0	0	0
AT1G20580	0	1	0	0	0	0	0	1	0	0	0	0	0	0	0	0	0	0	NA	79.8	NA	NA	NA	NA	NA	136.9	NA	NA	NA	NA	NA	NA	NA	NA	NA	NA	F5M15.9|F5M15_9	0	0	0
AT1G20610	0	0	0	0	0	0	0	1	0	0	0	0	0	0	0	0	0	0	NA	NA	NA	NA	NA	NA	NA	573.2	NA	NA	NA	NA	NA	NA	NA	NA	NA	NA	Cyclin B2;3|F5M15.6	0	0	0
AT1G20620	0	0	1	1	1	1	0	1	1	1	1	1	0	0	0	0	1	1	NA	NA	444.9	453.7	392.8	371.9	NA	238.8	177.1	155.6	253.6	274.7	NA	NA	NA	NA	249.4	405.8	ATCAT3|F5M15.5|F5M15_5|SEN2|SENESCENCE 2|catalase 3	0	0	1
AT1G20630	0	0	1	1	0	0	0	1	0	0	0	0	0	0	0	0	0	0	NA	NA	326.6	302.6	NA	NA	NA	175.1	NA	NA	NA	NA	NA	NA	NA	NA	NA	NA	CATALASE 1|F5M15.31|F5M15_31|catalase 1	0	0	0
AT1G20640	0	0	0	0	1	1	0	0	0	0	1	1	0	0	0	0	0	0	NA	NA	NA	NA	155.6	158.2	NA	NA	NA	NA	148.6	132.3	NA	NA	NA	NA	NA	NA	F5M15.4|NIN-like protein 4|NLP4	0	0	0
AT1G20650	0	1	1	1	1	1	1	1	0	0	1	1	0	0	0	0	1	1	NA	148.2	141.3	114.2	113.4	102	125.9	185.8	NA	NA	223.8	226	NA	NA	NA	NA	370.7	171.7	ALTERED SEED GERMINATION 5|F5M15.3	0	0	1
AT1G20670	0	1	1	0	0	1	1	0	0	0	0	0	0	0	0	0	0	0	NA	100.9	64.5	NA	NA	77.7	57.1	NA	NA	NA	NA	NA	NA	NA	NA	NA	NA	NA	F2D10.15|F2D10_15	0	0	0
AT1G20691	0	0	0	0	0	0	1	0	0	0	0	0	0	0	0	0	0	0	NA	NA	NA	NA	NA	NA	108.2	NA	NA	NA	NA	NA	NA	NA	NA	NA	NA	NA	-	0	0	0
AT1G20693	0	0	0	1	0	0	0	1	0	0	0	0	0	0	0	0	0	0	NA	NA	NA	113.9	NA	NA	NA	123.6	NA	NA	NA	NA	NA	NA	NA	NA	NA	NA	HIGH MOBILITY GROUP BETA 1|HMG BETA 1|NFD02|NFD2|NUCLEOSOME/CHROMATIN ASSEMBLY FACTOR GROUP D 02|NUCLEOSOME/CHROMATIN ASSEMBLY FACTOR GROUP D 2|high mobility group B2	0	0	0
AT1G20696	0	0	0	0	0	0	0	0	0	0	0	0	0	0	0	0	1	0	NA	NA	NA	NA	NA	NA	NA	NA	NA	NA	NA	NA	NA	NA	NA	NA	147.4	NA	NFD03|NFD3|NUCLEOSOME/CHROMATIN ASSEMBLY FACTOR|high mobility group B3	0	0	0
AT1G20700	0	0	1	1	0	0	0	0	0	0	0	0	0	0	0	0	0	0	NA	NA	122.1	113.6	NA	NA	NA	NA	NA	NA	NA	NA	NA	NA	NA	NA	NA	NA	ATWOX14|F2D10.19|F2D10_19|WUSCHEL RELATED HOMEOBOX 14|WUSCHEL related homeobox 14	0	0	1
AT1G20710	0	0	0	0	0	0	0	1	0	0	0	0	0	0	0	0	0	0	NA	NA	NA	NA	NA	NA	NA	181.1	NA	NA	NA	NA	NA	NA	NA	NA	NA	NA	F2D10.20|F2D10_20|WOX13B|WUSCHEL related homeobox 10|WUSCHEL related homeobox 13B	0	0	0
AT1G20720	0	0	0	0	0	0	0	1	0	0	0	0	0	0	0	0	0	0	NA	NA	NA	NA	NA	NA	NA	120.6	NA	NA	NA	NA	NA	NA	NA	NA	NA	NA	F2D10.21|F2D10_21	0	0	0
AT1G20735	0	0	0	0	0	0	1	0	0	0	0	0	0	0	0	0	0	0	NA	NA	NA	NA	NA	NA	49.2	NA	NA	NA	NA	NA	NA	NA	NA	NA	NA	NA	-	0	0	0
AT1G20740	0	0	0	0	0	0	0	1	0	0	0	0	0	0	0	0	0	0	NA	NA	NA	NA	NA	NA	NA	124.9	NA	NA	NA	NA	NA	NA	NA	NA	NA	NA	F2D10.23|F2D10_23	0	0	0
AT1G20760	0	1	1	0	0	0	0	0	0	0	0	0	0	0	0	0	0	0	NA	67.1	54.2	NA	NA	NA	NA	NA	NA	NA	NA	NA	NA	NA	NA	NA	NA	NA	F2D10.25|F2D10_25	0	0	0
AT1G20770	0	0	0	0	0	0	0	1	0	0	0	0	0	0	0	0	0	0	NA	NA	NA	NA	NA	NA	NA	88.7	NA	NA	NA	NA	NA	NA	NA	NA	NA	NA	F2D10.26|F2D10_26	0	0	0
AT1G20780	0	1	1	1	1	1	1	1	0	0	1	1	0	0	0	0	0	1	NA	209.6	197.5	236.9	108.5	125.8	135.7	73.4	NA	NA	207.2	199.2	NA	NA	NA	NA	NA	205.6	ARABIDOPSIS THALIANA PLANT U-BOX 44|ATPUB44|F2D10.27|F2D10_27|PLANT U-BOX 44|PUB44|senescence-associated E3 ubiquitin ligase 1	0	0	0
AT1G20790	0	0	0	0	1	1	1	0	0	0	0	0	0	0	0	0	0	0	NA	NA	NA	NA	106.7	119.9	202.6	NA	NA	NA	NA	NA	NA	NA	NA	NA	NA	NA	F2D10.28|F2D10_28	0	0	0
AT1G20795	0	0	0	0	0	0	0	1	0	0	0	0	0	0	0	0	0	0	NA	NA	NA	NA	NA	NA	NA	231.8	NA	NA	NA	NA	NA	NA	NA	NA	NA	NA	-	0	0	0
AT1G20800	0	0	0	0	0	0	0	1	0	0	0	0	0	0	0	0	0	0	NA	NA	NA	NA	NA	NA	NA	432.8	NA	NA	NA	NA	NA	NA	NA	NA	NA	NA	F2D10.30|F2D10_30	0	0	0
AT1G20816	0	0	1	1	0	1	0	0	0	0	0	0	0	0	0	0	0	1	NA	NA	591.1	511.3	NA	88	NA	NA	NA	NA	NA	NA	NA	NA	NA	NA	NA	236.1	F2D10.33|F2D10_33	0	0	0
AT1G20820	0	1	0	0	0	0	1	0	0	0	0	0	0	0	0	0	0	0	NA	120.3	NA	NA	NA	NA	102.3	NA	NA	NA	NA	NA	NA	NA	NA	NA	NA	NA	61258.TRNA-TRP-1	0	0	0
AT1G20823	0	0	0	0	0	0	0	1	1	0	0	0	0	0	0	0	0	0	NA	NA	NA	NA	NA	NA	NA	84.2	79.9	NA	NA	NA	NA	NA	NA	NA	NA	NA	F2D10.34|F2D10_34	0	0	0
AT1G20830	0	0	0	0	0	0	0	1	0	0	0	0	0	0	0	0	0	0	NA	NA	NA	NA	NA	NA	NA	87.2	NA	NA	NA	NA	NA	NA	NA	NA	NA	NA	F2D10.35|F2D10_35|MULTIPLE CHLOROPLAST DIVISION SITE 1	0	0	0
AT1G20840	0	0	1	0	0	0	0	1	0	0	0	0	0	0	0	0	0	1	NA	NA	133.5	NA	NA	NA	NA	79.4	NA	NA	NA	NA	NA	NA	NA	NA	NA	121.3	AtTMT1|F9H16.18|F9H16_18|tonoplast monosaccharide transporter1	0	0	1
AT1G20850	0	0	1	1	0	0	0	1	0	0	1	1	1	0	0	0	0	1	NA	NA	230.4	223.3	NA	NA	NA	109.9	NA	NA	179.6	149.3	58.9	NA	NA	NA	NA	213.9	F9H16.17|F9H16_17|PAPAIN-TYPE CYSTEINE ENDOPEPTIDASE XCP2|xylem cysteine peptidase 2	0	0	0
AT1G20860	0	0	1	0	0	0	0	0	0	0	0	0	0	0	0	0	0	0	NA	NA	70.2	NA	NA	NA	NA	NA	NA	NA	NA	NA	NA	NA	NA	NA	NA	NA	F9H16.16|F9H16_16|phosphate transporter 1;8	0	0	0
AT1G20875	0	0	0	0	0	0	1	0	0	0	0	0	0	0	0	0	0	0	NA	NA	NA	NA	NA	NA	72.8	NA	NA	NA	NA	NA	NA	NA	NA	NA	NA	NA	-	0	0	0
AT1G20890	0	0	1	1	1	1	1	0	0	0	1	0	1	0	0	0	1	1	NA	NA	330	304.5	179	166.3	171.2	NA	NA	NA	211.2	NA	77.1	NA	NA	NA	151.7	226.2	F9H16.13|F9H16_13	0	0	0
AT1G20900	0	1	1	1	1	1	1	1	1	1	1	1	0	1	1	0	0	1	NA	165.2	326.9	384.5	311.3	310.9	322.6	290.7	136.9	139.9	372.3	361.4	NA	113.8	109.8	NA	NA	348.6	AHL27|AT-hook motif nuclear-localized protein 27|ESCAROLA|F9H16.12|F9H16_12|ORE7|ORESARA 7	0	0	0
AT1G20910	0	0	0	0	0	0	0	1	0	0	0	0	1	0	0	0	0	0	NA	NA	NA	NA	NA	NA	NA	88.2	NA	NA	NA	NA	46.3	NA	NA	NA	NA	NA	F9H16.11|F9H16_11	0	0	0
AT1G20920	0	1	0	0	0	0	1	1	0	0	0	0	1	0	0	0	0	0	NA	73.1	NA	NA	NA	NA	43.3	64.9	NA	NA	NA	NA	50.9	NA	NA	NA	NA	NA	F9H16.10|F9H16_10|RCF1|regulator of CBF gene expression 1	0	0	0
AT1G20930	0	1	1	1	1	1	0	1	0	0	1	1	1	0	0	0	0	1	NA	79.8	148.7	132.2	116.9	87.3	NA	86.4	NA	NA	66.3	65	43.3	NA	NA	NA	NA	90.5	CYCLIN-DEPENDENT KINASE B2;2|F9H16.8|F9H16_8|cyclin-dependent kinase B2;2	0	0	0
AT1G20950	0	0	0	0	0	0	0	1	0	0	0	0	0	0	0	0	0	0	NA	NA	NA	NA	NA	NA	NA	79.4	NA	NA	NA	NA	NA	NA	NA	NA	NA	NA	F9H16.6|F9H16_6	0	0	0
AT1G20967	0	1	1	1	1	0	0	0	0	0	0	1	0	0	0	0	0	1	NA	135.5	239.2	244.6	91.7	NA	NA	NA	NA	NA	NA	130.6	NA	NA	NA	NA	NA	197.8	NoInfo	0	0	0
AT1G20970	0	0	0	0	0	0	0	1	0	0	0	0	0	0	0	0	0	0	NA	NA	NA	NA	NA	NA	NA	122.1	NA	NA	NA	NA	NA	NA	NA	NA	NA	NA	F9H16.4|F9H16_4	0	0	0
AT1G20980	0	1	1	1	1	1	1	1	0	0	1	0	0	0	0	0	0	1	NA	132.7	284.5	307.1	182	263.7	102.3	96.7	NA	NA	166.6	NA	NA	NA	NA	NA	NA	335.9	ATSPL14|F9H16.3|F9H16_3|FBR6|SPL1R2|SQUAMOSA PROMOTER BINDING PROTEIN-LIKE 14|squamosa promoter binding protein-like 14	0	0	0
AT1G20990	1	0	1	1	1	1	1	1	1	0	0	0	0	0	0	0	0	1	104.7	NA	344.2	366.6	200.8	192	86.6	530	89.1	NA	NA	NA	NA	NA	NA	NA	NA	210.4	F9H16.2|F9H16_2	0	0	0
AT1G21000	0	0	1	0	0	1	1	0	0	0	0	0	0	0	0	0	0	0	NA	NA	404.8	NA	NA	181	112.1	NA	NA	NA	NA	NA	NA	NA	NA	NA	NA	NA	F9H16.1|F9H16_1	0	0	1
AT1G21010	0	0	0	0	0	0	1	0	0	0	0	0	1	0	0	0	0	0	NA	NA	NA	NA	NA	NA	74.8	NA	NA	NA	NA	NA	53.5	NA	NA	NA	NA	NA	F9H16.19|F9H16_19	0	0	0
AT1G21050	0	0	0	0	0	0	1	0	0	0	0	0	0	0	0	0	0	0	NA	NA	NA	NA	NA	NA	157.4	NA	NA	NA	NA	NA	NA	NA	NA	NA	NA	NA	T22I11.13|T22I11_13	0	0	1
AT1G21060	0	0	1	0	0	0	0	1	0	0	0	0	0	0	0	0	1	1	NA	NA	267.7	NA	NA	NA	NA	167.8	NA	NA	NA	NA	NA	NA	NA	NA	437.3	344.1	T22I11.12|T22I11_12	0	0	0
AT1G21070	0	0	1	1	0	0	0	1	0	0	0	0	0	0	0	0	0	0	NA	NA	138.8	118.2	NA	NA	NA	307.2	NA	NA	NA	NA	NA	NA	NA	NA	NA	NA	T22I11.10|T22I11_10|UDP-Rha/UDP-Gal transporter 2|URGT2	0	0	0
AT1G21080	0	0	1	1	1	0	0	1	0	0	0	0	0	0	0	0	0	0	NA	NA	176.7	173.7	89.4	NA	NA	253	NA	NA	NA	NA	NA	NA	NA	NA	NA	NA	T22I11.9|T22I11_9	0	0	0
AT1G21100	0	0	1	1	1	1	1	0	0	0	1	0	0	0	0	0	0	1	NA	NA	435.2	406.4	158.6	124.3	53.1	NA	NA	NA	156.2	NA	NA	NA	NA	NA	NA	285.5	T22I11.7|T22I11_7|indole glucosinolate O-methyltransferase 1	0	0	1
AT1G21110	0	0	1	1	0	1	0	1	0	0	0	0	0	0	0	0	0	1	NA	NA	428.7	473.3	NA	109.3	NA	69.7	NA	NA	NA	NA	NA	NA	NA	NA	NA	181.3	T22I11.6|T22I11_6|indole glucosinolate O-methyltransferase 3	0	0	0
AT1G21120	0	1	1	1	1	0	0	0	0	0	0	0	0	0	0	0	0	1	NA	163	390.3	432.4	128.5	NA	NA	NA	NA	NA	NA	NA	NA	NA	NA	NA	NA	249.9	T22I11.5|T22I11_5|indole glucosinolate O-methyltransferase 2	0	0	0
AT1G21130	0	0	1	1	1	1	1	0	1	0	1	1	0	0	0	0	0	1	NA	NA	633.6	650.9	193.7	185.3	104.3	NA	106	NA	231.9	197.8	NA	NA	NA	NA	NA	499.4	T22I11.4|T22I11_4|indole glucosinolate O-methyltransferase 4	0	0	0
AT1G21140	0	0	0	0	0	0	0	1	0	0	0	0	0	0	0	0	0	0	NA	NA	NA	NA	NA	NA	NA	453.1	NA	NA	NA	NA	NA	NA	NA	NA	NA	NA	AtVTL1|T22I11.3|T22I11_3|VTL1|Vacuolar Iron Transporter-Like 1	0	0	1
AT1G21200	0	1	1	1	0	0	0	0	0	0	0	0	0	0	0	0	0	0	NA	80.1	64.8	66.5	NA	NA	NA	NA	NA	NA	NA	NA	NA	NA	NA	NA	NA	NA	F16F4.11|F16F4_11	0	0	0
AT1G21202	0	0	0	0	0	0	0	0	0	0	0	0	1	0	0	0	0	0	NA	NA	NA	NA	NA	NA	NA	NA	NA	NA	NA	NA	54.3	NA	NA	NA	NA	NA	MIR781A|microRNA781A|p_MI0005111	0	0	0
AT1G21210	0	0	0	0	0	0	0	1	0	0	0	0	0	0	0	0	0	0	NA	NA	NA	NA	NA	NA	NA	82.9	NA	NA	NA	NA	NA	NA	NA	NA	NA	NA	F16F4.10|F16F4_10|wall associated kinase 4	0	0	0
AT1G21220	0	0	0	0	0	0	0	0	0	0	0	0	1	0	0	0	0	0	NA	NA	NA	NA	NA	NA	NA	NA	NA	NA	NA	NA	40.6	NA	NA	NA	NA	NA	F16F4.18|F16F4_18	0	0	0
AT1G21245	0	0	0	0	0	0	0	1	0	0	0	0	0	0	0	0	0	0	NA	NA	NA	NA	NA	NA	NA	75.2	NA	NA	NA	NA	NA	NA	NA	NA	NA	NA	-	0	0	0
AT1G21270	0	1	1	1	0	0	0	0	0	0	1	1	0	0	0	0	0	1	NA	103.4	91.7	92.2	NA	NA	NA	NA	NA	NA	187.1	134.7	NA	NA	NA	NA	NA	235.1	F16F4.5|F16F4_5|wall-associated kinase 2	0	0	0
AT1G21286	0	0	0	0	0	0	0	1	0	0	0	0	0	0	0	0	0	0	NA	NA	NA	NA	NA	NA	NA	106.4	NA	NA	NA	NA	NA	NA	NA	NA	NA	NA	-	0	0	0
AT1G21310	0	0	0	0	0	1	1	0	0	0	0	0	0	0	0	0	0	1	NA	NA	NA	NA	NA	105.5	86.6	NA	NA	NA	NA	NA	NA	NA	NA	NA	NA	128.5	ATEXT3|F16F4.4|F16F4_4|ROOT-SHOOT-HYPOCOTYL DEFECTIVE|RSH|extensin 3	0	0	0
AT1G21326	0	0	1	1	1	1	1	1	0	0	1	1	0	0	0	0	0	1	NA	NA	299.5	268.9	115.3	92.1	100.3	339.4	NA	NA	144.6	135.6	NA	NA	NA	NA	NA	239.9	-	0	0	0
AT1G21360	1	0	1	1	1	0	1	1	0	0	1	0	0	0	0	0	0	1	120.9	NA	219.4	183.5	120.5	NA	129.8	159.3	NA	NA	151.4	NA	NA	NA	NA	NA	NA	97.7	F24J8.2|F24J8_2|glycolipid transfer protein 2	0	0	1
AT1G21370	0	0	0	0	0	0	0	1	0	0	0	0	0	0	0	0	0	0	NA	NA	NA	NA	NA	NA	NA	96.4	NA	NA	NA	NA	NA	NA	NA	NA	NA	NA	F24J8.26|F24J8_26	0	0	0
AT1G21380	0	1	1	1	1	1	1	0	1	0	1	1	0	0	0	0	1	1	NA	278.8	449.1	454.9	255.6	281.2	112.1	NA	127.3	NA	306.1	317.8	NA	NA	NA	NA	514.7	398.9	F24J8.3|F24J8_3	0	0	0
AT1G21400	0	1	1	1	1	1	0	1	0	0	0	0	0	0	0	0	1	1	NA	188.1	217.7	165.9	153.4	139.2	NA	213.8	NA	NA	NA	NA	NA	NA	NA	NA	443.1	187.1	F24J8.4|F24J8_4	0	0	0
AT1G21430	0	0	1	1	0	0	0	0	0	0	0	0	1	0	0	0	0	0	NA	NA	118.4	152.3	NA	NA	NA	NA	NA	NA	NA	NA	58.5	NA	NA	NA	NA	NA	F24J8.6|F24J8_6	1	0	0
AT1G21450	0	0	1	1	1	1	1	1	0	0	0	0	0	0	0	0	0	1	NA	NA	171	149.4	93.8	93.8	66.9	159.3	NA	NA	NA	NA	NA	NA	NA	NA	NA	122	F24J8.8|F24J8_8|SCARECROW-like 1	0	0	0
AT1G21460	0	0	0	0	0	0	0	0	0	0	0	0	0	0	0	0	0	1	NA	NA	NA	NA	NA	NA	NA	NA	NA	NA	NA	NA	NA	NA	NA	NA	NA	88.4	AtSWEET1|F24J8.9|F24J8_9	0	0	0
AT1G21470	1	0	0	0	0	0	1	1	0	0	1	1	0	0	0	0	0	0	202.3	NA	NA	NA	NA	NA	82.6	790	NA	NA	127.9	147	NA	NA	NA	NA	NA	NA	F24J8.28	0	0	0
AT1G21475	0	0	0	0	0	0	0	1	0	0	0	0	0	0	0	0	0	0	NA	NA	NA	NA	NA	NA	NA	180.6	NA	NA	NA	NA	NA	NA	NA	NA	NA	NA	-	0	0	0
AT1G21480	0	0	1	1	0	0	1	0	0	0	0	0	0	0	0	0	0	0	NA	NA	62.4	79.7	NA	NA	66.9	NA	NA	NA	NA	NA	NA	NA	NA	NA	NA	NA	F24J8.10|F24J8_10	0	0	0
AT1G21490	0	0	0	0	0	0	1	0	0	0	0	0	0	0	0	0	0	0	NA	NA	NA	NA	NA	NA	47.2	NA	NA	NA	NA	NA	NA	NA	NA	NA	NA	NA	F24J8.27	0	0	0
AT1G21500	0	0	0	0	0	0	0	1	0	0	0	0	0	0	0	0	0	0	NA	NA	NA	NA	NA	NA	NA	90.7	NA	NA	NA	NA	NA	NA	NA	NA	NA	NA	F24J8.11|F24J8_11	0	0	0
AT1G21510	0	0	1	1	1	1	1	0	1	1	1	1	1	1	1	0	0	1	NA	NA	240.4	231.1	93.6	126.4	76.7	NA	119.7	156.5	207.1	221.3	56.6	144.3	97.2	NA	NA	197.4	F24J8.12|F24J8_12	0	0	0
AT1G21525	0	0	0	0	0	0	0	1	0	0	0	0	0	0	0	0	1	0	NA	NA	NA	NA	NA	NA	NA	312.7	NA	NA	NA	NA	NA	NA	NA	NA	246.9	NA	-	0	0	0
AT1G21560	0	0	0	0	0	0	0	0	0	0	0	0	0	0	0	0	1	0	NA	NA	NA	NA	NA	NA	NA	NA	NA	NA	NA	NA	NA	NA	NA	NA	174	NA	F24J8.19|F24J8_19	0	0	0
AT1G21580	0	0	1	1	0	0	0	1	0	0	0	0	0	0	0	0	0	0	NA	NA	221.3	185.4	NA	NA	NA	147.6	NA	NA	NA	NA	NA	NA	NA	NA	NA	NA	F24J8.17|F24J8_17	0	0	0
AT1G21590	0	1	1	1	1	1	1	0	1	0	1	1	0	0	1	0	1	1	NA	182.4	488.7	478.3	417.9	334.1	304.9	NA	141.8	NA	285.2	290.4	NA	NA	113.7	NA	201	462.3	F24J8.18|F24J8_18	0	0	0
AT1G21600	0	0	0	0	0	0	0	1	0	0	0	0	0	0	0	0	0	0	NA	NA	NA	NA	NA	NA	NA	154.9	NA	NA	NA	NA	NA	NA	NA	NA	NA	NA	F24J8.20|plastid transcriptionally active 6	0	0	0
AT1G21610	0	0	0	0	0	0	0	1	0	0	0	0	0	0	0	0	0	0	NA	NA	NA	NA	NA	NA	NA	152.4	NA	NA	NA	NA	NA	NA	NA	NA	NA	NA	F24J8.24|UBN1|Ubinuclein 1	0	0	0
AT1G21640	0	1	1	1	0	1	1	1	0	0	1	1	0	0	0	0	0	1	NA	122.1	70.1	71.4	NA	78.1	57.1	107.9	NA	NA	121.4	108.5	NA	NA	NA	NA	NA	97.3	ATNADK2|F8K7.5|F8K7_5|NAD KINASE 2|NAD kinase 2	0	0	0
AT1G21651	0	0	0	0	0	0	1	1	0	0	0	0	0	0	0	0	0	0	NA	NA	NA	NA	NA	NA	259.7	94.4	NA	NA	NA	NA	NA	NA	NA	NA	NA	NA	-	0	0	0
AT1G21670	0	0	1	1	1	1	0	0	0	0	0	0	0	0	0	0	0	0	NA	NA	240	215	146.1	145.6	NA	NA	NA	NA	NA	NA	NA	NA	NA	NA	NA	NA	F8K7.9|F8K7_9	0	0	0
AT1G21680	0	0	1	1	1	0	0	1	0	0	0	0	0	0	0	0	1	1	NA	NA	252.9	215.4	149.7	NA	NA	146.6	NA	NA	NA	NA	NA	NA	NA	NA	154.6	244.4	F8K7.10|F8K7_10	0	0	1
AT1G21695	0	1	0	0	0	0	0	0	0	0	0	0	0	0	0	0	0	0	NA	105.2	NA	NA	NA	NA	NA	NA	NA	NA	NA	NA	NA	NA	NA	NA	NA	NA	-	0	0	0
AT1G21710	0	1	0	0	0	0	0	0	0	0	0	0	0	0	0	0	0	0	NA	98.5	NA	NA	NA	NA	NA	NA	NA	NA	NA	NA	NA	NA	NA	NA	NA	NA	8-oxoguanine-DNA glycosylase 1|ARABIDOPSIS 8-OXOGUANINE-DNA GLYCOSYLASE 1|ATOGG1|F8K7.14|F8K7_14	0	0	0
AT1G21730	0	0	1	1	0	0	0	0	0	0	0	0	0	0	0	0	1	1	NA	NA	85.2	86.9	NA	NA	NA	NA	NA	NA	NA	NA	NA	NA	NA	NA	207.8	128.2	F8K7.17|F8K7_17	0	0	0
AT1G21738	0	0	0	0	0	1	1	1	0	0	1	1	0	0	0	0	0	1	NA	NA	NA	NA	NA	177.4	51.2	93.4	NA	NA	213.4	197.2	NA	NA	NA	NA	NA	102.1	-	0	0	0
AT1G21740	0	0	0	0	0	0	0	0	1	0	0	0	0	0	0	0	0	0	NA	NA	NA	NA	NA	NA	NA	NA	111.2	NA	NA	NA	NA	NA	NA	NA	NA	NA	F8K7.18|F8K7_18	0	0	0
AT1G21780	0	0	0	0	0	0	0	1	0	0	0	0	0	0	0	0	0	0	NA	NA	NA	NA	NA	NA	NA	637.1	NA	NA	NA	NA	NA	NA	NA	NA	NA	NA	F8K7.22|F8K7_22	0	0	0
AT1G21790	0	0	1	1	1	1	1	0	0	0	1	1	0	0	0	0	0	1	NA	NA	137.7	116	100.8	90.9	147.5	NA	NA	NA	114.5	128.1	NA	NA	NA	NA	NA	107.3	F8K7.23|F8K7_23	0	0	0
AT1G21810	0	0	0	0	0	0	0	0	0	0	0	0	0	0	0	0	1	1	NA	NA	NA	NA	NA	NA	NA	NA	NA	NA	NA	NA	NA	NA	NA	NA	450.9	262.2	T26F17.2	0	0	0
AT1G21830	0	0	1	1	0	1	1	0	0	0	0	0	0	0	0	0	0	0	NA	NA	252.4	212.4	NA	145.2	116.1	NA	NA	NA	NA	NA	NA	NA	NA	NA	NA	NA	AT1G21820|T26F17.4	0	0	0
AT1G21835	0	0	0	0	0	1	1	0	0	0	0	0	0	0	0	0	0	0	NA	NA	NA	NA	NA	170.9	118	NA	NA	NA	NA	NA	NA	NA	NA	NA	NA	NA	-	0	0	0
AT1G21850	0	0	1	0	0	0	0	1	0	0	0	0	0	0	0	0	0	0	NA	NA	73.5	NA	NA	NA	NA	140.4	NA	NA	NA	NA	NA	NA	NA	NA	NA	NA	SKU5 similar 8|T26F17.6|T26F17_6	0	0	0
AT1G21880	0	1	1	1	1	1	1	1	0	0	1	1	0	0	0	0	0	1	NA	150.7	124.7	128.2	107.8	122.9	61	948.6	NA	NA	137.5	141.3	NA	NA	NA	NA	NA	123.7	LYP2|LysM-containing receptor protein 2|T26F17.10|T26F17_10|lysm domain GPI-anchored protein 1 precursor	0	0	0
AT1G21890	0	0	0	0	0	1	0	0	0	0	0	0	0	0	0	0	0	0	NA	NA	NA	NA	NA	94.9	NA	NA	NA	NA	NA	NA	NA	NA	NA	NA	NA	NA	T26F17.11|T26F17_11|Usually multiple acids move in and out Transporters 19	0	0	0
AT1G21900	0	0	0	0	1	1	0	1	0	0	0	0	0	0	0	0	0	0	NA	NA	NA	NA	153.3	173.4	NA	237.3	NA	NA	NA	NA	NA	NA	NA	NA	NA	NA	T26F17.12|T26F17_12|p24 subfamily delta 5	0	0	0
AT1G21920	0	1	0	0	1	0	0	0	0	0	0	0	0	0	0	0	0	0	NA	120.7	NA	NA	140.3	NA	NA	NA	NA	NA	NA	NA	NA	NA	NA	NA	NA	NA	T26F17.15|T26F17_15	0	0	0
AT1G21925	0	0	0	0	0	0	0	1	0	0	0	0	0	0	0	0	0	0	NA	NA	NA	NA	NA	NA	NA	54.7	NA	NA	NA	NA	NA	NA	NA	NA	NA	NA	-	0	0	0
AT1G21950	0	0	0	0	0	0	0	1	0	0	0	0	0	0	0	0	0	0	NA	NA	NA	NA	NA	NA	NA	87.9	NA	NA	NA	NA	NA	NA	NA	NA	NA	NA	T26F17.18|T26F17_18	0	0	0
AT1G21960	0	0	0	0	0	0	0	0	0	0	0	0	1	0	0	0	0	0	NA	NA	NA	NA	NA	NA	NA	NA	NA	NA	NA	NA	48.2	NA	NA	NA	NA	NA	T26F17.19|T26F17_19	0	0	0
AT1G21975	1	1	1	1	1	1	1	0	0	0	1	1	1	1	1	0	1	1	261.3	215.6	293.6	337.9	250.7	210	421	NA	NA	NA	241.5	273.3	66.1	250.1	277.8	NA	282.2	321.8	NoInfo	0	0	0
AT1G21980	1	0	1	1	0	0	1	1	0	0	0	0	0	0	1	0	0	0	233.3	NA	339.5	293.4	NA	NA	167.2	297.7	NA	NA	NA	NA	NA	NA	178.3	NA	NA	NA	ATPIP5K1|ATPIPK1|PHOSPHATIDYLINOSITOL-4-PHOSPHATE 5-KINASE|phosphatidylinositol-4-phosphate 5-kinase 1	0	0	1
AT1G21990	1	1	1	1	1	1	1	1	1	1	1	1	1	1	1	1	0	1	303.1	105.9	245.4	254.7	228.8	251.8	411.2	204.1	281.9	509.9	484.8	531.8	134.1	962.2	626.8	585.7	NA	249.2	F2E2.2|F2E2_2	0	0	0
AT1G22010	0	0	0	0	0	0	0	1	0	0	0	0	0	0	0	0	0	0	NA	NA	NA	NA	NA	NA	NA	111.9	NA	NA	NA	NA	NA	NA	NA	NA	NA	NA	F2E2.5|F2E2_5	0	0	0
AT1G22015	0	0	0	0	0	0	0	1	0	0	0	0	0	0	0	0	0	0	NA	NA	NA	NA	NA	NA	NA	160.1	NA	NA	NA	NA	NA	NA	NA	NA	NA	NA	-	0	0	0
AT1G22030	0	0	0	0	0	0	0	1	0	0	0	0	0	0	0	0	0	0	NA	NA	NA	NA	NA	NA	NA	121.1	NA	NA	NA	NA	NA	NA	NA	NA	NA	NA	F2E2.8|F2E2_8	0	0	1
AT1G22050	0	0	1	0	0	0	0	1	0	0	1	0	0	0	0	0	0	0	NA	NA	75	NA	NA	NA	NA	62.7	NA	NA	98.6	NA	NA	NA	NA	NA	NA	NA	F2E2.12|F2E2_12|membrane-anchored ubiquitin-fold protein 6 precursor	0	0	1
AT1G22060	0	1	1	1	0	0	1	0	0	0	1	1	0	0	0	0	1	1	NA	134.8	74.3	93.4	NA	NA	151.5	NA	NA	NA	131.3	144.2	NA	NA	NA	NA	143.5	104.2	F2E2.13|F2E2_13	0	0	0
AT1G22065	0	0	0	0	0	0	0	1	0	0	0	0	0	0	0	0	0	0	NA	NA	NA	NA	NA	NA	NA	144.9	NA	NA	NA	NA	NA	NA	NA	NA	NA	NA	-	0	0	0
AT1G22070	0	1	1	1	0	0	0	0	0	0	0	0	0	0	0	0	0	1	NA	90.3	173.9	167.9	NA	NA	NA	NA	NA	NA	NA	NA	NA	NA	NA	NA	NA	113.1	F2E2.14|F2E2_14|TGA1A-related gene 3|TRANSCRIPTION FACTOR TGA3	0	0	0
AT1G22080	0	0	0	0	0	0	0	1	0	0	0	0	0	0	0	0	1	0	NA	NA	NA	NA	NA	NA	NA	130.9	NA	NA	NA	NA	NA	NA	NA	NA	86	NA	F2E2.15|F2E2_15	0	0	0
AT1G22100	1	1	0	0	1	1	0	0	0	0	1	0	0	0	0	0	0	1	110.1	102	NA	NA	188	211.5	NA	NA	NA	NA	159.6	NA	NA	NA	NA	NA	NA	199.1	F2E2.17|F2E2_17	0	0	0
AT1G22110	0	1	1	1	1	0	1	0	0	0	1	0	1	0	0	0	0	1	NA	98.5	269.9	267	149.6	NA	57.1	NA	NA	NA	112.2	NA	50.9	NA	NA	NA	NA	145	F2E2.18|F2E2_18	0	0	0
AT1G22120	0	0	1	0	0	0	0	1	0	0	0	0	0	0	0	0	0	0	NA	NA	72.3	NA	NA	NA	NA	250.8	NA	NA	NA	NA	NA	NA	NA	NA	NA	NA	F2E2.19|F2E2_19	0	0	0
AT1G22130	0	1	1	1	0	0	1	1	0	0	0	0	0	0	0	0	0	1	NA	127	137.1	129.4	NA	NA	51.2	183.8	NA	NA	NA	NA	NA	NA	NA	NA	NA	124.4	AGAMOUS-like 104|F2E2.20|F2E2_20	0	0	0
AT1G22140	0	0	0	0	0	0	0	0	0	0	0	0	1	0	0	0	0	0	NA	NA	NA	NA	NA	NA	NA	NA	NA	NA	NA	NA	42.9	NA	NA	NA	NA	NA	F2E2.21|F2E2_21	0	0	0
AT1G22150	0	0	0	0	0	0	0	1	0	0	0	0	0	0	0	0	0	0	NA	NA	NA	NA	NA	NA	NA	97.4	NA	NA	NA	NA	NA	NA	NA	NA	NA	NA	F2E2.22|F2E2_22|SULFATE TANSPORTER SULTR1;3|sulfate transporter 1;3	0	0	1
AT1G22160	0	0	1	1	0	0	0	0	0	0	0	0	0	0	0	0	0	1	NA	NA	166.9	188.2	NA	NA	NA	NA	NA	NA	NA	NA	NA	NA	NA	NA	NA	107.3	F2E2.23|F2E2_23	0	0	0
AT1G22170	1	0	0	0	0	0	0	0	0	0	0	0	0	0	0	0	0	0	118.6	NA	NA	NA	NA	NA	NA	NA	NA	NA	NA	NA	NA	NA	NA	NA	NA	NA	F16L1.10|F16L1_10	0	0	0
AT1G22180	0	0	1	1	1	0	1	0	0	0	0	0	0	0	0	0	0	0	NA	NA	294.2	285.3	171.9	NA	112.1	NA	NA	NA	NA	NA	NA	NA	NA	NA	NA	NA	F16L1.9|F16L1_9	0	0	0
AT1G22190	0	0	0	0	0	1	1	1	0	0	0	0	1	0	0	0	0	0	NA	NA	NA	NA	NA	161.7	110.2	110.9	NA	NA	NA	NA	61.1	NA	NA	NA	NA	NA	F16L1.8|F16L1_8|RAP2.4|related to AP2 4	0	0	1
AT1G22220	0	0	0	0	0	0	1	1	0	0	0	0	0	0	0	0	0	0	NA	NA	NA	NA	NA	NA	74.8	206.1	NA	NA	NA	NA	NA	NA	NA	NA	NA	NA	F16L1.5|F16L1_5|auxin up-regulated f-box protein 2	1	0	0
AT1G22230	0	1	1	1	1	0	1	0	0	0	0	0	0	0	0	0	0	1	NA	140.8	248.6	225.5	110.6	NA	68.9	NA	NA	NA	NA	NA	NA	NA	NA	NA	NA	174.5	F16L1.4|F16L1_4	0	0	0
AT1G22240	0	0	0	0	0	0	0	0	0	0	0	0	1	0	0	0	0	0	NA	NA	NA	NA	NA	NA	NA	NA	NA	NA	NA	NA	39.9	NA	NA	NA	NA	NA	APUM8|F16L1.3|F16L1_3|pumilio 8	0	0	0
AT1G22250	0	0	0	0	0	0	0	1	0	0	0	0	0	0	0	0	0	0	NA	NA	NA	NA	NA	NA	NA	63.4	NA	NA	NA	NA	NA	NA	NA	NA	NA	NA	F16L1.2|F16L1_2	0	0	0
AT1G22270	0	1	0	0	0	0	0	0	0	0	0	0	0	0	0	0	0	0	NA	90	NA	NA	NA	NA	NA	NA	NA	NA	NA	NA	NA	NA	NA	NA	NA	NA	T16E15.11|T16E15_11	0	0	0
AT1G22280	0	1	1	1	1	1	1	0	0	0	1	1	0	0	0	0	0	1	NA	174	152.3	137.1	93.2	93.4	74.8	NA	NA	NA	144.3	117.3	NA	NA	NA	NA	NA	123	T16E15.10|T16E15_10|phytochrome-associated protein phosphatase type 2C	0	0	1
AT1G22290	0	0	0	0	0	0	1	1	0	0	0	0	0	0	0	0	0	0	NA	NA	NA	NA	NA	NA	63	109.6	NA	NA	NA	NA	NA	NA	NA	NA	NA	NA	T16E15.9|T16E15_9	0	0	0
AT1G22300	0	0	1	1	0	0	0	0	0	0	0	0	0	0	0	0	0	0	NA	NA	115.9	112.5	NA	NA	NA	NA	NA	NA	NA	NA	NA	NA	NA	NA	NA	NA	14-3-3 PROTEIN G-BOX FACTOR14 EPSILON|14-3-3EPSILON|GF14 EPSILON|general regulatory factor 10	0	0	0
AT1G22330	1	1	0	0	0	1	1	1	1	0	1	1	1	0	0	0	1	1	203.1	211.7	NA	NA	NA	135.8	183	87.7	132.1	NA	289.4	290.5	58.9	NA	NA	NA	644.7	286.9	T16E15.6|T16E15_6	0	0	0
AT1G22350	0	0	0	0	0	0	0	1	0	0	0	0	0	0	0	0	0	0	NA	NA	NA	NA	NA	NA	NA	282.7	NA	NA	NA	NA	NA	NA	NA	NA	NA	NA	T16E15.4	0	0	0
AT1G22360	1	1	1	1	1	0	1	0	0	0	0	0	0	0	0	0	0	0	118.6	180.3	190.1	169.4	138.1	NA	84.6	NA	NA	NA	NA	NA	NA	NA	NA	NA	NA	NA	AtUGT85A2|UDP-glucosyl transferase 85A2	0	0	1
AT1G22370	0	0	0	0	0	0	0	0	0	0	0	0	0	0	0	0	1	1	NA	NA	NA	NA	NA	NA	NA	NA	NA	NA	NA	NA	NA	NA	NA	NA	351.8	233.1	AtUGT85A5|T16E15.2|T16E15_2|UDP-glucosyl transferase 85A5	0	0	0
AT1G22400	0	1	1	1	0	1	0	0	0	0	1	1	0	0	0	0	1	1	NA	269.6	251.8	261.9	NA	132.5	NA	NA	NA	NA	228	181.7	NA	NA	NA	NA	253.7	455.8	ARABIDOPSIS THALIANA UDP-GLUCOSYL TRANSFERASE 85A1|ATUGT85A1|F12K8.26|F12K8_26	0	0	0
AT1G22403	0	0	1	0	0	0	1	0	0	0	0	0	0	0	0	0	0	0	NA	NA	208.2	NA	NA	NA	72.8	NA	NA	NA	NA	NA	NA	NA	NA	NA	NA	NA	-	0	0	0
AT1G22420	0	0	0	0	0	0	0	1	0	0	0	0	0	0	0	0	0	0	NA	NA	NA	NA	NA	NA	NA	174.8	NA	NA	NA	NA	NA	NA	NA	NA	NA	NA	F12K8.23|F12K8_23	0	0	0
AT1G22430	0	0	1	1	0	0	1	0	0	0	0	0	0	0	0	0	0	1	NA	NA	153.8	142.9	NA	NA	88.5	NA	NA	NA	NA	NA	NA	NA	NA	NA	NA	118.9	F12K8.22|F12K8_22	0	0	0
AT1G22440	0	0	0	0	0	0	0	0	0	0	0	0	1	0	0	0	0	0	NA	NA	NA	NA	NA	NA	NA	NA	NA	NA	NA	NA	56.2	NA	NA	NA	NA	NA	F12K8.21|F12K8_21	0	0	1
AT1G22450	0	0	0	0	0	0	0	1	0	0	0	0	0	0	0	0	0	0	NA	NA	NA	NA	NA	NA	NA	274.7	NA	NA	NA	NA	NA	NA	NA	NA	NA	NA	ATCOX6B2|CYTOCHROME C OXIDASE 6B2|F12K8.20|F12K8_20|SUBUNIT 6B OF CYTOCHROME C OXIDASE|cytochrome C oxidase 6B	0	0	0
AT1G22460	0	0	0	1	1	1	0	0	0	0	0	0	0	0	0	0	0	1	NA	NA	NA	122.5	118.3	129.8	NA	NA	NA	NA	NA	NA	NA	NA	NA	NA	NA	137.8	F12K8.19|F12K8_19	0	0	0
AT1G22470	0	0	0	1	0	0	1	1	0	0	0	0	0	0	0	0	0	0	NA	NA	NA	129	NA	NA	78.7	171.3	NA	NA	NA	NA	NA	NA	NA	NA	NA	NA	F12K8.18|F12K8_18	0	0	0
AT1G22480	0	0	0	0	0	0	0	1	0	0	0	0	0	0	0	0	0	0	NA	NA	NA	NA	NA	NA	NA	202.6	NA	NA	NA	NA	NA	NA	NA	NA	NA	NA	F12K8.17|F12K8_17	0	0	0
AT1G22490	0	0	0	0	0	0	1	0	1	0	1	1	0	0	0	0	1	1	NA	NA	NA	NA	NA	NA	55.1	NA	73.5	NA	154.7	148.5	NA	NA	NA	NA	164.3	205	F12K8.16|F12K8_16|bHLH094|bHLH94	0	0	1
AT1G22500	0	0	1	1	1	0	0	0	0	0	0	0	0	0	0	0	0	0	NA	NA	319.9	302	126.2	NA	NA	NA	NA	NA	NA	NA	NA	NA	NA	NA	NA	NA	Arabidopsis thaliana Arabidopsis toxicos en levadura 15|Arabidopsis toxicos en levadura 15|AtATL15|F12K8.15|F12K8_15	0	0	1
AT1G22510	0	0	0	0	0	0	0	1	0	0	0	0	0	0	0	0	0	0	NA	NA	NA	NA	NA	NA	NA	356.7	NA	NA	NA	NA	NA	NA	NA	NA	NA	NA	F12K8.14|F12K8_14	0	0	1
AT1G22520	0	1	0	0	0	1	0	0	0	0	0	0	0	0	0	0	1	1	NA	187	NA	NA	NA	139.8	NA	NA	NA	NA	NA	NA	NA	NA	NA	NA	167.2	181.6	F12K8.27|F12K8_27	0	0	0
AT1G22530	0	1	1	1	1	1	1	1	0	0	1	1	1	0	0	0	0	1	NA	164.5	210.9	205.1	132.4	135	92.5	163.6	NA	NA	189.4	178.4	54.3	NA	NA	NA	NA	202.2	F12K8.13|F12K8_13|PATELLIN 2	1	0	1
AT1G22540	0	0	0	1	0	0	1	1	0	0	0	0	0	0	0	0	0	0	NA	NA	NA	173.8	NA	NA	92.5	310.5	NA	NA	NA	NA	NA	NA	NA	NA	NA	NA	F12K8.12|F12K8_12	0	0	1
AT1G22550	1	0	1	1	0	0	1	0	0	0	1	1	0	0	0	0	1	0	94.6	NA	189.2	163.2	NA	NA	57.1	NA	NA	NA	111.4	99.3	NA	NA	NA	NA	108.7	NA	F12K8.11|F12K8_11	0	0	1
AT1G22560	0	0	0	0	0	0	0	1	0	0	0	0	0	0	0	0	0	0	NA	NA	NA	NA	NA	NA	NA	111.1	NA	NA	NA	NA	NA	NA	NA	NA	NA	NA	F12K8.9	0	0	0
AT1G22570	1	0	1	1	0	0	1	1	1	0	1	1	0	0	0	0	1	1	107	NA	238.7	237.6	NA	NA	104.3	105.4	126.5	NA	304.2	262.6	NA	NA	NA	NA	194.8	359.5	F12K8.8|F12K8_8	0	0	1
AT1G22580	0	0	1	1	0	0	0	0	0	0	0	0	0	0	0	0	0	0	NA	NA	282.3	265.9	NA	NA	NA	NA	NA	NA	NA	NA	NA	NA	NA	NA	NA	NA	F12K8.30	0	0	0
AT1G22590	0	0	0	0	0	0	0	1	0	0	0	0	0	0	0	0	0	0	NA	NA	NA	NA	NA	NA	NA	234.3	NA	NA	NA	NA	NA	NA	NA	NA	NA	NA	AGAMOUS-like 87|F12K8.7|F12K8_7	0	0	0
AT1G22600	1	0	0	0	0	0	1	1	0	0	0	0	0	0	0	0	0	1	162	NA	NA	NA	NA	NA	102.3	215	NA	NA	NA	NA	NA	NA	NA	NA	NA	225.2	F12K8.5|F12K8_5	0	0	0
AT1G22610	0	0	1	1	0	0	0	1	0	0	0	0	1	0	0	0	0	0	NA	NA	212.9	158.5	NA	NA	NA	462.1	NA	NA	NA	NA	57.3	NA	NA	NA	NA	NA	F12K8.4|F12K8_4	0	0	0
AT1G22630	0	0	0	0	0	0	0	1	0	0	0	0	0	0	0	0	0	0	NA	NA	NA	NA	NA	NA	NA	268.5	NA	NA	NA	NA	NA	NA	NA	NA	NA	NA	F12K8.2	0	0	0
AT1G22640	0	1	1	1	1	1	1	1	1	0	0	1	0	0	0	0	0	1	NA	148.6	361.3	319.2	282	313	120	537.5	130.5	NA	NA	161.9	NA	NA	NA	NA	NA	262.2	ARABIDOPSIS THALIANA MYB DOMAIN PROTEIN 3|ARABIDOPSIS THALIANA MYB DOMAIN PROTEIN 3|ATMYB3|T22J18.19|T22J18_19|TRANSCRIPTION FACTOR MYB3|myb domain protein 3	0	0	0
AT1G22651	0	0	1	1	1	0	0	0	0	0	1	0	0	0	0	0	0	1	NA	NA	166.9	186.3	71.5	NA	NA	NA	NA	NA	118.4	NA	NA	NA	NA	NA	NA	220	NoInfo	0	0	0
AT1G22670	0	0	0	0	0	0	0	1	0	0	0	0	0	0	0	0	0	0	NA	NA	NA	NA	NA	NA	NA	214.8	NA	NA	NA	NA	NA	NA	NA	NA	NA	NA	T22J18.16|T22J18_16	0	0	0
AT1G22680	0	0	0	1	0	0	0	0	0	0	1	0	0	0	0	0	0	1	NA	NA	NA	89.6	NA	NA	NA	NA	NA	NA	147.4	NA	NA	NA	NA	NA	NA	155.6	T22J18.15|T22J18_15	0	0	0
AT1G22710	0	0	0	0	0	0	0	1	0	0	0	0	0	0	0	0	0	0	NA	NA	NA	NA	NA	NA	NA	203.8	NA	NA	NA	NA	NA	NA	NA	NA	NA	NA	ARABIDOPSIS THALIANA SUCROSE-PROTON SYMPORTER 2|ATSUC2|SUCROSE TRANSPORTER 1|SUCROSE-H+ SYMPORTER|SUT1|T22J18.12|T22J18_12|sucrose-proton symporter 2	0	0	1
AT1G22740	1	0	1	1	1	0	1	1	0	0	1	0	0	0	0	0	0	1	142.6	NA	165.1	140.2	83.1	NA	74.8	121.4	NA	NA	150.5	NA	NA	NA	NA	NA	NA	184.7	ATRABG3B|RAB GTPase homolog G3B|RAB GTPase homolog G3B|RAB7|RAB75|T22J18.9|T22J18_9	0	0	1
AT1G22750	0	0	0	0	0	0	0	1	0	0	0	0	0	0	0	0	0	0	NA	NA	NA	NA	NA	NA	NA	115.1	NA	NA	NA	NA	NA	NA	NA	NA	NA	NA	T22J18.8|T22J18_8	0	0	0
AT1G22767	0	1	1	1	1	1	1	0	0	0	1	1	0	0	0	0	1	1	NA	317.3	350.2	352.2	243.2	227.7	143.6	NA	NA	NA	241.2	224.6	NA	NA	NA	NA	521	247.1	NoInfo	0	0	0
AT1G22780	0	0	0	0	0	0	0	1	0	0	0	0	0	0	0	0	0	0	NA	NA	NA	NA	NA	NA	NA	147.1	NA	NA	NA	NA	NA	NA	NA	NA	NA	NA	40S RIBOSOMAL PROTEIN S18|PFL1|POINTED FIRST LEAVES|POINTED FIRST LEAVES 1|RPS18A|T22J18.5|T22J18_5	0	0	0
AT1G22810	0	1	0	0	0	1	0	0	0	0	0	0	0	0	0	0	1	0	NA	223.4	NA	NA	NA	370.5	NA	NA	NA	NA	NA	NA	NA	NA	NA	NA	150.8	NA	T22J18.2|T22J18_2	0	0	0
AT1G22830	1	0	1	1	1	0	1	1	1	1	1	1	1	0	1	0	0	1	200	NA	761.2	743.9	441.9	NA	123.9	616.7	211.6	206.8	285.5	282.4	75.6	NA	127	NA	NA	579.9	-	0	0	0
AT1G22860	0	0	0	0	0	0	0	1	0	0	0	0	0	0	0	0	0	0	NA	NA	NA	NA	NA	NA	NA	109.9	NA	NA	NA	NA	NA	NA	NA	NA	NA	NA	F19G10.18|F19G10_18	0	0	0
AT1G22882	1	1	1	1	1	1	1	1	0	1	1	1	0	0	0	0	0	1	189.9	203.3	411.7	383.7	236.9	209.2	214.4	126.9	NA	136.5	316.2	298.4	NA	NA	NA	NA	NA	414.7	AtSUN3|SUN-domain protein 3|SUN3	0	0	0
AT1G22910	1	0	0	0	0	0	1	1	0	0	0	0	0	0	0	0	0	0	154.3	NA	NA	NA	NA	NA	151.5	194.8	NA	NA	NA	NA	NA	NA	NA	NA	NA	NA	F19G10.13|F19G10_13	0	0	0
AT1G22930	0	0	1	1	0	0	1	1	0	0	0	0	0	0	0	0	0	0	NA	NA	83.8	78.9	NA	NA	49.2	52.5	NA	NA	NA	NA	NA	NA	NA	NA	NA	NA	F19G10.11|F19G10_11	0	0	0
AT1G22940	0	0	0	0	0	0	0	0	0	0	0	0	0	0	0	0	1	0	NA	NA	NA	NA	NA	NA	NA	NA	NA	NA	NA	NA	NA	NA	NA	NA	122.3	NA	F19G10.10|F19G10_10|TH-1|THIAMINE REQUIRING 1|THIAMINEE|THIE	0	0	0
AT1G22950	0	0	0	0	0	0	0	1	0	0	0	0	0	0	0	0	0	0	NA	NA	NA	NA	NA	NA	NA	96.7	NA	NA	NA	NA	NA	NA	NA	NA	NA	NA	F19G10.24|F19G10_24	0	0	0
AT1G22960	0	0	1	0	0	0	0	0	0	0	0	0	0	0	0	0	0	0	NA	NA	68.5	NA	NA	NA	NA	NA	NA	NA	NA	NA	NA	NA	NA	NA	NA	NA	F19G10.9|F19G10_9	0	0	0
AT1G22970	0	0	0	0	0	0	0	1	0	0	0	0	0	0	0	0	0	0	NA	NA	NA	NA	NA	NA	NA	223.3	NA	NA	NA	NA	NA	NA	NA	NA	NA	NA	F19G10.8|F19G10_8	0	0	0
AT1G22980	0	0	0	0	0	0	0	1	0	0	0	0	0	0	0	0	0	0	NA	NA	NA	NA	NA	NA	NA	154.1	NA	NA	NA	NA	NA	NA	NA	NA	NA	NA	-	0	0	0
AT1G22990	0	0	0	0	1	1	1	0	0	0	0	0	0	0	0	0	0	1	NA	NA	NA	NA	187	160.3	141.6	NA	NA	NA	NA	NA	NA	NA	NA	NA	NA	193.6	F19G10.25|heavy metal associated isoprenylated plant protein 22	0	0	1
AT1G23000	0	0	0	0	0	1	0	1	0	0	0	0	0	0	0	0	0	1	NA	NA	NA	NA	NA	148.6	NA	315	NA	NA	NA	NA	NA	NA	NA	NA	NA	186.8	F19G10.6|F19G10_6	0	0	0
AT1G23020	0	1	1	1	0	0	1	0	0	0	0	0	0	0	0	0	0	1	NA	168.7	159.1	153.8	NA	NA	90.5	NA	NA	NA	NA	NA	NA	NA	NA	NA	NA	214.2	ATFRO3|F19G10.4|F19G10_4|FERRIC REDUCTION OXIDASE 3|ferric reduction oxidase 3	0	0	0
AT1G23030	0	0	1	1	1	1	1	1	0	1	1	1	0	1	1	0	0	1	NA	NA	187.6	200	122.4	106.8	98.4	89.7	NA	145.3	228.4	250.7	NA	105.7	96.2	NA	NA	232.4	F19G10.3|F19G10_3	0	0	1
AT1G23037	0	0	0	0	0	0	0	1	0	0	0	0	0	0	0	0	0	0	NA	NA	NA	NA	NA	NA	NA	112.1	NA	NA	NA	NA	NA	NA	NA	NA	NA	NA	-	0	0	0
AT1G23040	0	0	1	1	0	1	1	0	0	0	0	0	0	1	0	0	0	0	NA	NA	218.4	244.4	NA	105.9	186.9	NA	NA	NA	NA	NA	NA	98.2	NA	NA	NA	NA	F19G10.19	0	0	1
AT1G23050	0	0	1	1	0	0	0	0	0	0	0	0	0	0	0	0	0	0	NA	NA	289.5	278	NA	NA	NA	NA	NA	NA	NA	NA	NA	NA	NA	NA	NA	NA	F19G10.1	0	0	1
AT1G23052	0	0	1	0	0	0	1	0	0	0	0	0	0	0	0	0	0	1	NA	NA	222.6	NA	NA	NA	208.5	NA	NA	NA	NA	NA	NA	NA	NA	NA	NA	149.4	-	0	0	0
AT1G23074	0	0	0	0	0	0	0	1	0	0	0	0	0	0	0	0	0	0	NA	NA	NA	NA	NA	NA	NA	820.7	NA	NA	NA	NA	NA	NA	NA	NA	NA	NA	NoInfo	0	0	0
AT1G23080	1	1	1	1	1	1	1	1	1	1	1	1	1	1	1	1	1	1	331	212.4	390.4	405.6	280.7	301.5	924.6	96.9	217.2	238	398.5	368.9	120	333.3	297.2	243.8	517.1	322.5	ARABIDOPSIS PIN-FORMED 7|ATPIN7|PIN-FORMED 7|T26J12.14|T26J12_14	1	0	1
AT1G23090	0	0	0	0	0	0	1	1	0	0	0	0	1	0	0	0	0	0	NA	NA	NA	NA	NA	NA	63	467.8	NA	NA	NA	NA	52.4	NA	NA	NA	NA	NA	SULFATE TRANSPORTER|SULTR3;3|T26J12.13|T26J12_13|sulfate transporter 91	0	0	0
AT1G23100	0	1	1	1	0	1	0	1	1	0	1	1	0	0	0	0	1	1	NA	184.6	565.7	600.1	NA	112.8	NA	179.3	120.5	NA	225.8	197.4	NA	NA	NA	NA	134.3	649.8	T26J12.12|T26J12_12	0	0	0
AT1G23170	0	0	0	0	0	0	0	1	0	0	0	0	0	0	0	0	0	0	NA	NA	NA	NA	NA	NA	NA	727.8	NA	NA	NA	NA	NA	NA	NA	NA	NA	NA	T26J12.6|T26J12_6	0	0	0
AT1G23201	0	0	0	0	0	0	0	0	0	0	0	0	1	0	0	0	0	0	NA	NA	NA	NA	NA	NA	NA	NA	NA	NA	NA	NA	59.2	NA	NA	NA	NA	NA	-	0	0	0
AT1G23205	0	0	0	0	0	0	0	1	0	0	0	0	0	0	0	0	0	0	NA	NA	NA	NA	NA	NA	NA	116.1	NA	NA	NA	NA	NA	NA	NA	NA	NA	NA	F26F24.4|F26F24_4	0	0	1
AT1G23220	0	1	1	1	1	0	1	1	0	0	1	1	0	0	0	0	0	1	NA	111.5	139.9	138.5	71.5	NA	72.8	125.1	NA	NA	220.2	225	NA	NA	NA	NA	NA	80.2	F26F24.7|F26F24_7	0	0	1
AT1G23230	0	0	0	0	0	0	0	1	0	0	0	0	0	0	0	0	0	0	NA	NA	NA	NA	NA	NA	NA	132.6	NA	NA	NA	NA	NA	NA	NA	NA	NA	NA	F26F24.8|F26F24_8	0	0	0
AT1G23240	0	0	0	0	0	0	0	1	0	0	0	0	0	0	0	0	0	0	NA	NA	NA	NA	NA	NA	NA	215	NA	NA	NA	NA	NA	NA	NA	NA	NA	NA	F26F24.33|F26F24_33	0	0	0
AT1G23250	0	0	0	0	0	0	0	1	0	0	0	0	0	0	0	0	0	0	NA	NA	NA	NA	NA	NA	NA	146.1	NA	NA	NA	NA	NA	NA	NA	NA	NA	NA	F26F24.9|F26F24_9	0	0	1
AT1G23290	0	1	0	0	0	0	1	0	0	0	0	0	0	0	0	0	0	0	NA	101.3	NA	NA	NA	NA	66.9	NA	NA	NA	NA	NA	NA	NA	NA	NA	NA	NA	60S RIBOSOMAL PROTEIN L27A|F26F24.13|F26F24_13|RIBOSOMAL PROTEIN L27A|RPL27A	0	0	0
AT1G23300	0	0	0	0	0	0	0	1	0	0	0	0	0	0	0	0	0	0	NA	NA	NA	NA	NA	NA	NA	671.9	NA	NA	NA	NA	NA	NA	NA	NA	NA	NA	F26F24.14|F26F24_14	0	0	0
AT1G23310	0	1	1	1	0	1	1	0	0	0	1	1	0	0	0	0	0	1	NA	136.9	163	169.9	NA	79.2	68.9	NA	NA	NA	137.5	121	NA	NA	NA	NA	NA	168.3	ALANINE-2-OXOGLUTARATE AMINOTRANSFERASE 1|AOAT1|F26F24.16|F26F24_16|GGAT1|GLUTAMATE:GLYOXYLATE AMINOTRANSFERASE|GLUTAMATE:GLYOXYLATE AMINOTRANSFERASE 1|glutamate:glyoxylate aminotransferase	0	0	0
AT1G23320	0	0	1	1	0	0	0	0	0	0	0	0	0	0	0	0	0	0	NA	NA	120.3	111.3	NA	NA	NA	NA	NA	NA	NA	NA	NA	NA	NA	NA	NA	NA	F26F24.17|F26F24_17|tryptophan aminotransferase related 1	1	0	0
AT1G23330	0	1	1	1	0	0	0	1	0	0	1	0	0	0	0	0	0	0	NA	77.6	63	75.9	NA	NA	NA	354.4	NA	NA	75	NA	NA	NA	NA	NA	NA	NA	F26F24.20|F26F24_20	0	0	0
AT1G23360	0	1	1	0	1	1	1	0	0	0	0	0	0	0	0	0	0	1	NA	137.3	91.6	NA	194.4	217.9	80.7	NA	NA	NA	NA	NA	NA	NA	NA	NA	NA	125.1	F26F24.24|F26F24_24	0	0	0
AT1G23380	0	0	0	0	1	1	1	0	0	0	0	0	1	0	0	0	1	0	NA	NA	NA	NA	110.4	136.4	123.9	NA	NA	NA	NA	NA	51.7	NA	NA	NA	315.6	NA	F26F24.32|F26F24_32|KNAT6L|KNAT6S|KNOTTED1-like homeobox gene 6	0	0	0
AT1G23390	0	0	0	1	0	0	1	0	0	0	0	0	0	0	0	0	1	0	NA	NA	NA	187.2	NA	NA	171.2	NA	NA	NA	NA	NA	NA	NA	NA	NA	315.1	NA	F26F24.26|F26F24_26	0	0	0
AT1G23420	0	0	0	0	0	0	0	1	0	0	0	0	0	0	0	0	0	0	NA	NA	NA	NA	NA	NA	NA	195.6	NA	NA	NA	NA	NA	NA	NA	NA	NA	NA	F26F24.29|F26F24_29|INNER NO OUTER	0	0	0
AT1G23440	1	1	1	1	1	1	1	1	1	0	1	1	0	0	0	0	0	1	76.7	198.7	337.7	381.4	274.7	187.2	68.9	296.7	116.1	NA	158.9	168.4	NA	NA	NA	NA	NA	221.4	F28C11.26|F28C11_26	0	0	0
AT1G23460	0	0	1	0	0	0	0	0	0	0	0	0	0	0	0	0	0	0	NA	NA	85.2	NA	NA	NA	NA	NA	NA	NA	NA	NA	NA	NA	NA	NA	NA	NA	F28C11.9	0	0	0
AT1G23465	0	0	0	0	0	0	0	0	0	0	0	0	1	0	0	0	0	0	NA	NA	NA	NA	NA	NA	NA	NA	NA	NA	NA	NA	46.7	NA	NA	NA	NA	NA	-	0	0	0
AT1G23480	0	0	1	1	0	0	0	1	0	0	0	0	0	0	0	0	0	0	NA	NA	205	209.2	NA	NA	NA	434.8	NA	NA	NA	NA	NA	NA	NA	NA	NA	NA	ATCSLA03|ATCSLA3|CELLULOSE SYNTHASE-LIKE A3|CSLA3|F28C11.11|cellulose synthase-like A3	0	0	0
AT1G23490	0	0	1	1	1	1	1	1	0	0	1	1	0	0	0	0	0	1	NA	NA	210.1	211.3	103.8	79.4	110.2	302.5	NA	NA	134.8	127.2	NA	NA	NA	NA	NA	161.1	ADP-RIBOSYLATION FACTOR|ADP-RIBOSYLATION FACTOR 1A|ADP-ribosylation factor 1|ATARF|ATARF1|ATARFA1A|F28C11.12	0	0	0
AT1G23510	0	0	0	0	0	0	1	1	0	0	0	0	0	0	0	0	0	0	NA	NA	NA	NA	NA	NA	45.2	130.6	NA	NA	NA	NA	NA	NA	NA	NA	NA	NA	F28C11.14|F28C11_14	0	0	0
AT1G23530	0	0	0	0	0	0	0	1	0	0	0	0	0	0	0	0	0	0	NA	NA	NA	NA	NA	NA	NA	114.9	NA	NA	NA	NA	NA	NA	NA	NA	NA	NA	F28C11.16	0	0	0
AT1G23550	0	0	1	1	0	0	1	0	0	0	0	0	0	0	0	0	0	1	NA	NA	236.8	243.2	NA	NA	51.2	NA	NA	NA	NA	NA	NA	NA	NA	NA	NA	168.3	F28C11.18|similar to RCD one 2	0	0	0
AT1G23560	0	0	0	0	0	0	0	1	0	0	0	0	0	0	0	0	0	0	NA	NA	NA	NA	NA	NA	NA	120.1	NA	NA	NA	NA	NA	NA	NA	NA	NA	NA	F28C11.32	0	0	0
AT1G23660	0	0	0	0	0	0	0	0	0	0	0	0	1	0	0	0	0	0	NA	NA	NA	NA	NA	NA	NA	NA	NA	NA	NA	NA	36.5	NA	NA	NA	NA	NA	F28C11.23	0	0	0
AT1G23670	0	0	0	0	0	0	0	1	0	0	0	0	0	0	0	0	0	0	NA	NA	NA	NA	NA	NA	NA	140.4	NA	NA	NA	NA	NA	NA	NA	NA	NA	NA	F28C11.25	0	0	0
AT1G23710	1	1	1	1	1	1	1	1	1	1	1	1	0	0	1	0	1	1	91.5	314.4	601.9	570.1	423.8	350.6	269.5	118.6	128.9	165.4	341.7	323.4	NA	NA	100	NA	154.2	356.4	F5O8.26|F5O8_26	0	0	1
AT1G23724	0	0	0	0	0	0	0	1	0	0	0	0	0	0	0	0	0	0	NA	NA	NA	NA	NA	NA	NA	173.8	NA	NA	NA	NA	NA	NA	NA	NA	NA	NA	NoInfo	0	0	0
AT1G23730	0	0	1	1	0	0	0	0	0	0	0	0	0	0	0	0	0	0	NA	NA	104.4	94.4	NA	NA	NA	NA	NA	NA	NA	NA	NA	NA	NA	NA	NA	NA	ATBCA3|BETA CARBONIC ANHYDRASE 3|BETA CARBONIC ANHYDRASE 3|F5O8.28|F5O8_28|beta carbonic anhydrase 3	0	0	1
AT1G23740	0	1	0	0	0	0	0	0	0	0	1	0	0	0	0	0	0	0	NA	102.3	NA	NA	NA	NA	NA	NA	NA	NA	97.5	NA	NA	NA	NA	NA	NA	NA	F5O8.29|F5O8_29|alkenal/one oxidoreductase	0	0	0
AT1G23760	0	0	1	0	0	0	0	0	0	0	0	0	0	0	0	0	0	0	NA	NA	72.7	NA	NA	NA	NA	NA	NA	NA	NA	NA	NA	NA	NA	NA	NA	NA	F5O8.31|F5O8_31|PG3|POLYGALACTURONASE 3	0	0	0
AT1G23780	0	0	0	0	0	0	1	0	0	0	0	0	0	0	0	0	0	0	NA	NA	NA	NA	NA	NA	61	NA	NA	NA	NA	NA	NA	NA	NA	NA	NA	NA	F5O8.33|F5O8_33	0	0	0
AT1G23790	0	0	1	1	0	0	0	0	0	0	0	0	0	0	0	0	0	0	NA	NA	72.2	64.4	NA	NA	NA	NA	NA	NA	NA	NA	NA	NA	NA	NA	NA	NA	F5O8.34|F5O8_34	0	0	0
AT1G23800	0	0	1	1	0	0	1	1	0	0	0	0	0	0	0	0	0	0	NA	NA	115	108.4	NA	NA	53.1	318.4	NA	NA	NA	NA	NA	NA	NA	NA	NA	NA	ALDH2B|F5O8.35|F5O8_35|aldehyde dehydrogenase 2B|aldehyde dehydrogenase 2B7	0	0	1
AT1G23820	0	1	1	1	1	1	1	0	0	0	1	1	0	0	0	0	0	1	NA	100.6	294.3	283.9	168.1	205.4	82.6	NA	NA	NA	91.4	102.8	NA	NA	NA	NA	NA	255	F5O8.38|F5O8_38|spermidine synthase 1	0	0	0
AT1G23840	0	0	0	0	0	0	0	1	0	0	0	0	0	0	0	0	0	0	NA	NA	NA	NA	NA	NA	NA	333.7	NA	NA	NA	NA	NA	NA	NA	NA	NA	NA	F5O8.40|F5O8_40	0	0	0
AT1G23860	0	0	1	1	1	1	1	0	0	0	0	0	0	0	0	0	0	1	NA	NA	440.1	415.3	363.7	291.9	122	NA	NA	NA	NA	NA	NA	NA	NA	NA	NA	301.3	At-RSZ21|RS-containing zinc finger protein 21|RSZP21|SRZ-21|SRZ21|T23E23.2|T23E23_2	0	0	0
AT1G23870	0	0	1	1	0	0	0	0	0	0	0	0	1	0	0	0	1	1	NA	NA	365.3	347	NA	NA	NA	NA	NA	NA	NA	NA	67.2	NA	NA	NA	233.9	215.6	ATTPS9|T23E23.3|T23E23_3|TREHALOSE -6-PHOSPHATASE SYNTHASE S9|trehalose-phosphatase/synthase 9	0	0	0
AT1G23890	0	1	1	1	0	0	1	1	0	0	1	1	0	0	0	0	0	1	NA	118.9	99.8	99.8	NA	NA	118	88.2	NA	NA	122	111.7	NA	NA	NA	NA	NA	103.8	T23E23.6|T23E23_6	0	0	0
AT1G23910	0	0	0	0	0	0	0	1	0	0	0	0	0	0	0	0	0	0	NA	NA	NA	NA	NA	NA	NA	113.1	NA	NA	NA	NA	NA	NA	NA	NA	NA	NA	T23E23.8|T23E23_8	0	0	0
AT1G23940	0	0	0	0	0	0	0	1	0	0	0	0	0	0	0	0	0	0	NA	NA	NA	NA	NA	NA	NA	62.4	NA	NA	NA	NA	NA	NA	NA	NA	NA	NA	NoInfo	0	0	0
AT1G23960	0	0	0	0	0	0	0	1	0	0	0	0	0	0	0	0	0	0	NA	NA	NA	NA	NA	NA	NA	109.4	NA	NA	NA	NA	NA	NA	NA	NA	NA	NA	T23E23.14|T23E23_14	0	0	0
AT1G23980	0	1	1	0	0	0	0	0	0	0	1	1	0	0	0	0	1	1	NA	129.9	72.1	NA	NA	NA	NA	NA	NA	NA	149.4	140.4	NA	NA	NA	NA	175.4	220	T23E23.15|T23E23_15	0	0	0
AT1G23990	0	1	1	1	0	0	1	1	0	0	0	1	0	0	0	0	0	1	NA	77.3	50.6	63.9	NA	NA	86.6	62.2	NA	NA	NA	81.6	NA	NA	NA	NA	NA	82.9	T23E23.16|T23E23_16	0	0	0
AT1G24000	0	1	0	0	0	0	1	1	0	0	0	0	1	0	0	0	0	0	NA	84.3	NA	NA	NA	NA	68.9	111.4	NA	NA	NA	NA	52	NA	NA	NA	NA	NA	T23E23.17|T23E23_17	0	0	0
AT1G24050	0	1	0	0	0	0	0	0	0	0	0	0	0	0	0	0	0	0	NA	71.3	NA	NA	NA	NA	NA	NA	NA	NA	NA	NA	NA	NA	NA	NA	NA	NA	T23E23.20|T23E23_20	0	0	0
AT1G24068	0	0	0	0	0	0	0	0	0	0	0	0	0	0	0	0	0	1	NA	NA	NA	NA	NA	NA	NA	NA	NA	NA	NA	NA	NA	NA	NA	NA	NA	81.6	-	0	0	0
AT1G24070	0	0	0	0	0	0	0	1	0	0	0	0	0	0	0	0	0	0	NA	NA	NA	NA	NA	NA	NA	108.4	NA	NA	NA	NA	NA	NA	NA	NA	NA	NA	ATCSLA10|CELLULOSE SYNTHASE LIKE A10|T23E23.23|T23E23_23|cellulose synthase-like A10	0	0	0
AT1G24080	0	1	0	1	0	0	0	0	0	0	0	0	0	0	0	0	0	0	NA	96.7	NA	57.6	NA	NA	NA	NA	NA	NA	NA	NA	NA	NA	NA	NA	NA	NA	51237.TRNA-VAL-1	0	0	0
AT1G24095	0	0	0	0	0	0	0	1	0	0	0	0	0	0	0	0	0	0	NA	NA	NA	NA	NA	NA	NA	105.2	NA	NA	NA	NA	NA	NA	NA	NA	NA	NA	-	0	0	0
AT1G24100	0	0	0	1	0	1	0	0	0	0	0	0	0	0	0	0	0	1	NA	NA	NA	82.3	NA	76.3	NA	NA	NA	NA	NA	NA	NA	NA	NA	NA	NA	75.1	F3I6.2|F3I6_2|UDP-glucosyl transferase 74B1	0	0	1
AT1G24110	0	0	0	0	0	0	0	1	0	0	0	0	0	0	0	0	0	0	NA	NA	NA	NA	NA	NA	NA	106.6	NA	NA	NA	NA	NA	NA	NA	NA	NA	NA	F3I6.3|F3I6_3	0	0	0
AT1G24120	0	1	1	1	1	1	1	0	0	0	0	0	0	0	0	0	1	1	NA	146.5	310.3	329.8	141.6	106.8	108.2	NA	NA	NA	NA	NA	NA	NA	NA	NA	343.6	219.3	ARG1-like 1|F3I6.4|F3I6_4	0	0	1
AT1G24130	0	0	0	0	0	0	0	1	0	0	0	0	0	0	0	0	0	0	NA	NA	NA	NA	NA	NA	NA	474.3	NA	NA	NA	NA	NA	NA	NA	NA	NA	NA	F3I6.5|F3I6_5	0	0	0
AT1G24140	0	0	1	0	0	0	0	0	0	0	0	0	0	0	0	0	0	0	NA	NA	220.1	NA	NA	NA	NA	NA	NA	NA	NA	NA	NA	NA	NA	NA	NA	NA	F3I6.6|F3I6_6	0	0	0
AT1G24150	0	1	1	1	1	1	0	1	0	0	0	0	0	0	0	0	0	1	NA	122.1	291.6	252.6	149.8	130.2	NA	202.3	NA	NA	NA	NA	NA	NA	NA	NA	NA	152.5	ATFH4|F3I6.8|F3I6_8|FORMIN HOMOLOGUE 4|formin homologue 4	0	0	0
AT1G24160	0	0	0	0	0	0	1	0	0	0	0	0	0	0	0	0	1	0	NA	NA	NA	NA	NA	NA	98.4	NA	NA	NA	NA	NA	NA	NA	NA	NA	198.1	NA	F3I6.9|F3I6_9	0	0	0
AT1G24170	1	0	0	0	1	1	1	1	1	0	1	1	0	0	0	0	0	1	163.6	NA	NA	NA	205.6	173	141.6	395.9	140.1	NA	350.4	287.8	NA	NA	NA	NA	NA	361.6	F3I6.10|F3I6_10|GALACTURONOSYLTRANSFERASE-LIKE 8|GATL8	0	0	1
AT1G24180	0	0	1	1	1	1	0	0	0	0	0	0	0	0	0	0	0	1	NA	NA	892.1	821.8	204.9	233.4	NA	NA	NA	NA	NA	NA	NA	NA	NA	NA	NA	578.9	F3I6.11|F3I6_11|IAA-CONJUGATE-RESISTANT 4	0	0	0
AT1G24210	0	0	0	0	0	0	0	1	0	0	0	0	0	0	0	0	0	0	NA	NA	NA	NA	NA	NA	NA	189.3	NA	NA	NA	NA	NA	NA	NA	NA	NA	NA	F3I6.14|F3I6_14	0	0	0
AT1G24212	0	0	0	0	0	0	0	1	0	0	0	0	0	0	0	0	0	0	NA	NA	NA	NA	NA	NA	NA	116.9	NA	NA	NA	NA	NA	NA	NA	NA	NA	NA	-	0	0	0
AT1G24220	0	0	0	0	0	0	0	1	0	0	0	0	0	0	0	0	0	0	NA	NA	NA	NA	NA	NA	NA	111.9	NA	NA	NA	NA	NA	NA	NA	NA	NA	NA	F3I6.15|F3I6_15	0	0	0
AT1G24230	0	0	0	0	0	0	0	1	0	0	0	0	0	0	0	0	0	0	NA	NA	NA	NA	NA	NA	NA	100.9	NA	NA	NA	NA	NA	NA	NA	NA	NA	NA	F3I6.16|F3I6_16	0	0	0
AT1G24265	1	1	1	1	1	1	1	1	1	1	1	1	0	1	1	0	1	1	138.8	376.9	317	333.5	222.7	269.8	179	77.9	318.4	260.3	604	544.8	NA	121.6	127.3	NA	1232.8	687.5	-	0	0	0
AT1G24267	0	0	1	1	0	0	0	0	0	0	1	0	0	0	0	0	0	0	NA	NA	75.8	83.1	NA	NA	NA	NA	NA	NA	99.7	NA	NA	NA	NA	NA	NA	NA	-	0	0	0
AT1G24290	0	0	0	0	0	0	0	1	0	0	0	0	0	0	0	0	0	0	NA	NA	NA	NA	NA	NA	NA	117.4	NA	NA	NA	NA	NA	NA	NA	NA	NA	NA	F3I6.23|F3I6_23	0	0	0
AT1G24310	0	1	0	0	0	0	1	0	0	0	0	0	1	0	0	0	0	0	NA	71.3	NA	NA	NA	NA	43.3	NA	NA	NA	NA	NA	54.3	NA	NA	NA	NA	NA	F3I6.25|F3I6_25	0	0	0
AT1G24320	0	0	0	0	0	0	0	0	0	0	0	0	0	0	0	0	1	0	NA	NA	NA	NA	NA	NA	NA	NA	NA	NA	NA	NA	NA	NA	NA	NA	144.5	NA	F3I6.26|F3I6_26	0	0	0
AT1G24330	0	1	1	1	0	1	0	1	0	0	0	0	0	0	0	0	0	1	NA	85.8	142	154.6	NA	80	NA	597.2	NA	NA	NA	NA	NA	NA	NA	NA	NA	135.7	F3I6.27|F3I6_27	0	0	0
AT1G24340	0	0	1	1	0	1	1	0	0	0	1	1	0	0	0	0	0	1	NA	NA	109.7	95.9	NA	80.6	53.1	NA	NA	NA	117.8	123	NA	NA	NA	NA	NA	106.2	EMB260|EMBRYO DEFECTIVE 2421|EMBRYO DEFECTIVE 260|F3I6.28|F3I6_28	0	0	0
AT1G24350	0	0	1	0	0	0	0	0	0	0	0	0	0	0	0	0	0	1	NA	NA	116.9	NA	NA	NA	NA	NA	NA	NA	NA	NA	NA	NA	NA	NA	NA	94.6	F3I6.29|F3I6_29	0	0	0
AT1G24360	0	1	0	1	0	0	0	0	0	0	1	1	0	0	0	0	0	0	NA	132	NA	113.5	NA	NA	NA	NA	NA	NA	106.9	75.3	NA	NA	NA	NA	NA	NA	F21J9.2	0	0	0
AT1G24370	0	0	0	0	0	0	0	1	0	0	0	0	0	0	0	0	0	0	NA	NA	NA	NA	NA	NA	NA	196.3	NA	NA	NA	NA	NA	NA	NA	NA	NA	NA	F21J9.3	0	0	0
AT1G24400	0	0	1	1	0	1	0	0	0	0	0	0	0	0	0	0	0	1	NA	NA	91.7	86.8	NA	81.9	NA	NA	NA	NA	NA	NA	NA	NA	NA	NA	NA	100.1	AATL2|AMINO ACID TRANSPORTER-LIKE PROTEIN 2|ARABIDOPSIS LYSINE HISTIDINE TRANSPORTER 2|ATLHT2|F21J9.6|lysine histidine transporter 2	0	0	0
AT1G24405	0	0	1	0	0	0	0	0	0	0	0	0	0	0	0	0	0	1	NA	NA	77.3	NA	NA	NA	NA	NA	NA	NA	NA	NA	NA	NA	NA	NA	NA	91.9	-	0	0	0
AT1G24430	0	0	0	0	0	0	0	1	0	0	0	0	0	0	0	0	0	0	NA	NA	NA	NA	NA	NA	NA	432.3	NA	NA	NA	NA	NA	NA	NA	NA	NA	NA	F21J9.9	0	0	0
AT1G24440	1	0	1	1	1	1	0	0	0	0	1	0	0	0	0	0	0	1	98.5	NA	294.3	275.6	182.9	115.6	NA	NA	NA	NA	133.8	NA	NA	NA	NA	NA	NA	200.2	F21J9.10	0	0	0
AT1G24460	0	0	0	0	0	0	0	1	0	0	0	0	0	0	0	0	0	0	NA	NA	NA	NA	NA	NA	NA	96.9	NA	NA	NA	NA	NA	NA	NA	NA	NA	NA	F21J9.12|TGN-localized SYP41 interacting protein	0	0	0
AT1G24470	0	0	1	1	0	0	0	1	0	0	0	0	0	0	0	0	0	0	NA	NA	65.4	67.6	NA	NA	NA	240	NA	NA	NA	NA	NA	NA	NA	NA	NA	NA	ATKCR2|F21J9.13|beta-ketoacyl reductase 2	0	0	0
AT1G24480	0	0	0	0	0	0	0	0	0	0	0	0	1	0	0	0	0	0	NA	NA	NA	NA	NA	NA	NA	NA	NA	NA	NA	NA	57	NA	NA	NA	NA	NA	F21J9.14	0	0	0
AT1G24490	0	0	0	0	0	1	0	1	0	0	0	0	0	0	0	0	0	1	NA	NA	NA	NA	NA	79.4	NA	95.7	NA	NA	NA	NA	NA	NA	NA	NA	NA	60.7	ALBINA 4|ARABIDOPSIS THALIANA ENVELOPE MEMBRANE INTEGRASE|ARTEMIS|F21J9.16	0	0	0
AT1G24530	0	0	0	0	0	0	1	1	0	0	0	0	0	0	0	0	0	0	NA	NA	NA	NA	NA	NA	82.6	130.4	NA	NA	NA	NA	NA	NA	NA	NA	NA	NA	F21J9.19	0	0	0
AT1G24540	0	1	0	0	0	0	0	1	1	0	1	1	0	0	0	0	0	1	NA	225.1	NA	NA	NA	NA	NA	125.6	148.6	NA	280.7	241.2	NA	NA	NA	NA	NA	360.6	''cytochrome P450|F21J9.20|cytochrome P450|family 86|polypeptide 1|polypeptide 1''|subfamily C	0	0	0
AT1G24575	0	0	1	0	0	0	0	0	0	0	0	0	0	0	0	0	0	0	NA	NA	83.7	NA	NA	NA	NA	NA	NA	NA	NA	NA	NA	NA	NA	NA	NA	NA	-	0	0	0
AT1G24580	0	0	0	0	1	0	0	1	0	0	0	0	0	0	0	0	0	0	NA	NA	NA	NA	70	NA	NA	98.2	NA	NA	NA	NA	NA	NA	NA	NA	NA	NA	-	0	0	0
AT1G24590	0	0	0	0	0	0	0	1	0	0	0	0	0	0	0	0	0	0	NA	NA	NA	NA	NA	NA	NA	144.1	NA	NA	NA	NA	NA	NA	NA	NA	NA	NA	DORNROSCHEN-LIKE|DORNROSCHEN-like|DRN-LIKE|ENHANCER OF SHOOT REGENERATION 2|ESR2|F21J9.25|FOR SUPPRESSOR OF PHYTOCHROMEB-4 2|FOR SUPPRESSOR OF PHYTOCHROMEB-4 2|SOB2	1	0	0
AT1G24600	0	1	1	1	1	0	0	1	0	0	0	0	0	0	0	0	0	1	NA	96.3	183.3	151.9	104.3	NA	NA	111.1	NA	NA	NA	NA	NA	NA	NA	NA	NA	119.3	-	0	0	0
AT1G24625	0	1	1	1	1	1	1	0	1	0	1	0	0	0	0	0	0	1	NA	148.6	222.1	242.7	152.7	227.7	102.3	NA	118.5	NA	178.5	NA	NA	NA	NA	NA	NA	149.4	F21J9.29|zinc finger protein 7	0	0	0
AT1G24640	1	1	1	1	1	1	1	1	1	1	1	1	0	1	1	1	1	1	212.4	195.2	243.5	245.1	205.6	307.2	245.9	187.3	187.1	285.2	358.5	384	NA	105.7	131.9	176.5	285.1	387.6	F5A9.24	0	0	0
AT1G24650	0	1	1	0	0	0	0	0	0	0	0	0	0	0	0	0	0	0	NA	57.9	52.5	NA	NA	NA	NA	NA	NA	NA	NA	NA	NA	NA	NA	NA	NA	NA	F5A9.23	0	0	0
AT1G24657	0	0	1	1	0	0	0	0	0	0	0	0	0	0	0	0	0	0	NA	NA	111.4	125	NA	NA	NA	NA	NA	NA	NA	NA	NA	NA	NA	NA	NA	NA	-	0	0	0
AT1G24686	0	0	0	0	0	0	0	1	0	0	0	0	0	0	0	0	0	0	NA	NA	NA	NA	NA	NA	NA	749.8	NA	NA	NA	NA	NA	NA	NA	NA	NA	NA	-	0	0	0
AT1G24706	0	1	1	0	0	0	1	0	0	0	0	0	0	0	0	0	0	0	NA	88.6	107	NA	NA	NA	61	NA	NA	NA	NA	NA	NA	NA	NA	NA	NA	NA	AtTHO2|EMB2793|EMBRYO DEFECTIVE 2793|F5A9.21|F5A9_21	0	0	0
AT1G24733	0	1	0	0	0	0	0	0	0	0	0	0	0	0	0	0	0	0	NA	71.6	NA	NA	NA	NA	NA	NA	NA	NA	NA	NA	NA	NA	NA	NA	NA	NA	-	0	0	0
AT1G24764	0	0	1	1	0	0	0	1	0	0	0	0	0	0	0	0	0	0	NA	NA	130.8	108.2	NA	NA	NA	242.8	NA	NA	NA	NA	NA	NA	NA	NA	NA	NA	ATMAP70-2|F5A9.19|F5A9_19|microtubule-associated proteins 70-2	0	0	0
AT1G24822	0	0	0	0	0	0	0	0	0	0	1	1	0	0	0	0	0	0	NA	NA	NA	NA	NA	NA	NA	NA	NA	NA	65.6	78	NA	NA	NA	NA	NA	NA	F5A9.16	0	0	0
AT1G24880	0	1	0	0	1	1	0	0	0	0	1	0	0	0	0	0	0	1	NA	123.5	NA	NA	103.6	105.5	NA	NA	NA	NA	81.5	NA	NA	NA	NA	NA	NA	124.4	AtLpxC2|F5A9.14|F5A9_14|lipid X C2	0	0	0
AT1G24996	0	0	0	0	0	0	0	0	0	0	1	1	0	0	0	0	0	0	NA	NA	NA	NA	NA	NA	NA	NA	NA	NA	67.7	78.7	NA	NA	NA	NA	NA	NA	F5A9.10|F5A9_10	0	0	0
AT1G25054	0	1	0	0	1	1	0	0	0	0	1	1	0	0	0	0	0	1	NA	117.5	NA	NA	97.5	111.6	NA	NA	NA	NA	68.3	90.2	NA	NA	NA	NA	NA	132	AtLpxC3|F5A9.8|F5A9_8|lipid X C3	0	0	0
AT1G25097	0	0	0	0	0	0	0	0	0	0	0	1	0	0	0	0	0	0	NA	NA	NA	NA	NA	NA	NA	NA	NA	NA	NA	78.8	NA	NA	NA	NA	NA	NA	F5A9.6	0	0	0
AT1G25098	0	1	0	0	1	1	0	0	0	0	1	1	0	0	0	0	0	1	NA	130.6	NA	NA	109.6	134.4	NA	NA	NA	NA	83.8	104.8	NA	NA	NA	NA	NA	155.6	-	0	0	0
AT1G25175	0	1	0	0	1	1	0	0	0	0	1	1	0	0	0	0	0	1	NA	115	NA	NA	104.7	128.1	NA	NA	NA	NA	73.6	93.3	NA	NA	NA	NA	NA	132	-	0	0	0
AT1G25180	0	0	0	0	0	0	0	0	0	0	0	1	0	0	0	0	0	0	NA	NA	NA	NA	NA	NA	NA	NA	NA	NA	NA	83.8	NA	NA	NA	NA	NA	NA	F5A9.1	0	0	0
AT1G25220	0	0	1	1	0	0	1	1	0	0	0	0	0	0	0	0	0	1	NA	NA	173.3	195.9	NA	NA	100.3	42	NA	NA	NA	NA	NA	NA	NA	NA	NA	164.2	ANTHRANILATE SYNTHASE BETA SUBUNIT|F4F7.39|F4F7_39|TRP4|TRYPTOPHAN BIOSYNTHESIS 4|WEAK ETHYLENE INSENSITIVE7|WEI7|anthranilate synthase beta subunit 1	1	0	0
AT1G25230	1	0	0	0	1	1	1	0	0	0	1	1	0	0	0	0	0	0	230.2	NA	NA	NA	201.3	185.1	153.5	NA	NA	NA	205.7	198.5	NA	NA	NA	NA	NA	NA	F4F7.38|F4F7_38	0	0	1
AT1G25240	0	0	0	0	0	0	0	0	0	0	0	0	1	0	0	0	0	0	NA	NA	NA	NA	NA	NA	NA	NA	NA	NA	NA	NA	54.7	NA	NA	NA	NA	NA	F4F7.37|F4F7_37	0	0	0
AT1G25250	0	0	0	0	0	0	0	0	0	0	1	1	0	0	0	0	0	1	NA	NA	NA	NA	NA	NA	NA	NA	NA	NA	149.1	146.5	NA	NA	NA	NA	NA	210.4	AtIDD16|F4F7.36|F4F7_36|indeterminate(ID)-domain 16	1	0	0
AT1G25260	0	0	0	1	0	0	1	0	0	0	0	1	0	0	0	0	1	1	NA	NA	NA	87.1	NA	NA	45.2	NA	NA	NA	NA	131.9	NA	NA	NA	NA	333	196	F4F7.35|F4F7_35	0	0	1
AT1G25275	0	0	1	1	0	0	1	1	0	0	0	0	1	0	0	0	1	1	NA	NA	145.6	126.2	NA	NA	66.9	215.5	NA	NA	NA	NA	66.5	NA	NA	NA	178.8	168.3	-	0	0	0
AT1G25280	0	0	1	1	0	1	0	1	0	0	0	0	0	0	0	0	0	0	NA	NA	165.7	165.9	NA	118.7	NA	371.4	NA	NA	NA	NA	NA	NA	NA	NA	NA	NA	AtTLP10|F4F7.33|F4F7_33|tubby like protein 10	0	0	1
AT1G25300	0	0	1	1	1	1	0	0	0	0	0	0	0	0	0	0	1	1	NA	NA	60.4	65.9	83.3	119.1	NA	NA	NA	NA	NA	NA	NA	NA	NA	NA	265.3	110.7	F4F7.31|F4F7_31	0	0	0
AT1G25320	0	0	0	0	0	0	0	1	0	0	0	0	0	0	0	0	0	0	NA	NA	NA	NA	NA	NA	NA	176.8	NA	NA	NA	NA	NA	NA	NA	NA	NA	NA	F4F7.29|F4F7_29	0	0	1
AT1G25330	0	0	0	0	0	0	0	1	0	0	0	0	0	0	0	0	0	0	NA	NA	NA	NA	NA	NA	NA	158.1	NA	NA	NA	NA	NA	NA	NA	NA	NA	NA	CESTA|F4F7.28|F4F7_28|HAF|HALF FILLED	0	0	0
AT1G25340	1	1	1	1	1	0	1	0	0	0	1	1	0	0	0	0	0	1	100.8	78.7	221.5	186.9	93.1	NA	66.9	NA	NA	NA	95.5	94.7	NA	NA	NA	NA	NA	103.8	AtMYB116|F4F7.27|F4F7_27|myb domain protein 116	0	0	0
AT1G25370	0	0	1	1	0	0	0	1	0	0	0	0	0	0	0	0	0	1	NA	NA	167.4	127.7	NA	NA	NA	118.6	NA	NA	NA	NA	NA	NA	NA	NA	NA	222.4	F4F7.1	0	0	0
AT1G25380	0	1	1	1	1	0	0	1	0	0	1	0	0	0	0	0	0	1	NA	126	110.3	78.7	82.5	NA	NA	113.1	NA	NA	119.8	NA	NA	NA	NA	NA	NA	73.7	ARABIDOPSIS THALIANA NAD+ TRANSPORTER 2|ATNDT2|F4F7.45|NAD+ transporter 2	0	0	0
AT1G25390	0	0	1	1	0	1	0	1	0	0	0	0	0	0	0	0	0	1	NA	NA	308.9	282.5	NA	134.3	NA	127.6	NA	NA	NA	NA	NA	NA	NA	NA	NA	312.9	F2J7.14|F2J7_14	0	0	0
AT1G25400	0	0	0	0	1	1	1	0	0	0	1	1	0	0	0	0	0	1	NA	NA	NA	NA	147.6	162.8	157.4	NA	NA	NA	203.5	184.8	NA	NA	NA	NA	NA	251.9	F2J7.13|F2J7_13	0	0	1
AT1G25410	0	0	0	0	0	0	0	1	0	0	0	0	0	0	0	0	0	0	NA	NA	NA	NA	NA	NA	NA	227.5	NA	NA	NA	NA	NA	NA	NA	NA	NA	NA	ARABIDOPSIS THALIANA ISOPENTENYLTRANSFERASE 6|ATIPT6|F2J7.12|F2J7_12|isopentenyltransferase 6	0	0	0
AT1G25422	0	0	1	1	0	0	0	0	0	0	0	0	0	0	0	0	0	1	NA	NA	134.7	122.1	NA	NA	NA	NA	NA	NA	NA	NA	NA	NA	NA	NA	NA	188.2	-	0	0	0
AT1G25425	0	1	1	1	1	1	1	0	0	1	0	0	1	0	0	0	1	1	NA	168	193.5	221.9	158.8	219	94.4	NA	NA	163.5	NA	NA	57.7	NA	NA	NA	439.3	208.7	CLAVATA3/ESR-RELATED 43	0	0	0
AT1G25430	0	0	0	0	0	0	0	1	0	0	0	0	1	0	0	0	0	0	NA	NA	NA	NA	NA	NA	NA	106.1	NA	NA	NA	NA	73.3	NA	NA	NA	NA	NA	F2J7.11|F2J7_11	0	0	0
AT1G25440	0	0	1	0	1	1	1	1	0	0	0	1	0	0	0	0	0	1	NA	NA	126.4	NA	119.3	118.5	80.7	342.7	NA	NA	NA	157.5	NA	NA	NA	NA	NA	163.1	B-box domain protein 15|F2J7.10|F2J7_10	0	0	0
AT1G25450	0	1	1	1	1	1	0	1	0	0	0	0	0	0	0	0	0	1	NA	183.9	254.1	244.3	132	112.8	NA	339.4	NA	NA	NA	NA	NA	NA	NA	NA	NA	230.7	3-ketoacyl-CoA synthase 5|CER60|ECERIFERUM 60|F2J7.9|F2J7_9	0	0	1
AT1G25460	0	0	0	0	0	0	0	0	0	0	0	0	0	0	0	0	1	1	NA	NA	NA	NA	NA	NA	NA	NA	NA	NA	NA	NA	NA	NA	NA	NA	213.6	166.6	F2J7.17|F2J7_17	0	0	0
AT1G25480	0	0	1	0	0	0	1	1	0	0	0	0	0	0	0	0	0	0	NA	NA	90.7	NA	NA	NA	59	105.7	NA	NA	NA	NA	NA	NA	NA	NA	NA	NA	F2J7.18|F2J7_18	0	0	0
AT1G25490	0	0	1	1	0	0	0	1	0	0	0	0	0	0	0	0	0	0	NA	NA	85.5	88.2	NA	NA	NA	98.2	NA	NA	NA	NA	NA	NA	NA	NA	NA	NA	ATB BETA BETA|EER1|ENHANCED ETHYLENE RESPONSE 1|F2J7.19|F2J7_19|PHOSPHOPROTEIN PHOSPHATASE 2A REGULATORY SUBUNIT A|REGA|ROOTS CURL IN NPA|SERINE/THREONINE PROTEIN PHOSPHATASE TYPE 2A REGULATORY SUBUNIT A	1	0	0
AT1G25500	0	0	0	0	0	1	0	0	0	0	0	0	0	0	0	0	0	0	NA	NA	NA	NA	NA	122.2	NA	NA	NA	NA	NA	NA	NA	NA	NA	NA	NA	NA	F2J7.7|F2J7_7	0	0	0
AT1G25520	0	1	1	1	1	0	1	0	0	0	0	0	1	0	0	0	0	1	NA	175.7	231.3	252.8	152.1	NA	98.4	NA	NA	NA	NA	NA	56.6	NA	NA	NA	NA	225.5	F2J7.20|F2J7_20	0	0	0
AT1G25530	0	0	0	0	0	0	0	0	0	0	0	0	1	0	0	0	1	0	NA	NA	NA	NA	NA	NA	NA	NA	NA	NA	NA	NA	59.6	NA	NA	NA	185.6	NA	F2J7.5|F2J7_5	0	0	0
AT1G25540	0	0	0	0	0	0	0	1	0	0	0	0	0	0	0	0	0	0	NA	NA	NA	NA	NA	NA	NA	277.7	NA	NA	NA	NA	NA	NA	NA	NA	NA	NA	F2J7.4|F2J7_4|MED25|PHYTOCHROME AND FLOWERING TIME 1|mediator 25	0	0	0
AT1G25550	0	0	1	1	1	1	1	0	0	0	1	1	0	0	0	0	1	1	NA	NA	394.8	334.8	240	223.1	122	NA	NA	NA	316.5	268.7	NA	NA	NA	NA	375	245.4	-	0	0	0
AT1G25560	0	0	0	0	0	1	1	1	0	0	0	0	0	0	0	0	1	1	NA	NA	NA	NA	NA	220.2	157.4	272	NA	NA	NA	NA	NA	NA	NA	NA	441.7	352.7	AtTEM1|EDF1|ETHYLENE RESPONSE DNA BINDING FACTOR 1|F2J7.3|F2J7_3|TEMPRANILLO 1	0	0	0
AT1G25570	0	0	0	0	0	0	1	1	0	0	0	0	0	0	0	0	0	0	NA	NA	NA	NA	NA	NA	100.3	143.6	NA	NA	NA	NA	NA	NA	NA	NA	NA	NA	F2J7.2	0	0	1
AT1G25580	0	0	1	1	1	1	0	1	0	0	0	0	0	0	0	0	0	0	NA	NA	248	229.8	120.7	130.6	NA	129.4	NA	NA	NA	NA	NA	NA	NA	NA	NA	NA	ANAC008|Arabidopsis NAC domain containing protein 8|F2J7.1|SUPPRESSOR OF GAMMA RADIATION 1	0	0	1
AT1G25682	0	0	0	0	0	0	0	1	0	0	0	0	1	0	0	0	0	1	NA	NA	NA	NA	NA	NA	NA	69.4	NA	NA	NA	NA	53.9	NA	NA	NA	NA	105.9	F14G11.11|F14G11_11	0	0	0
AT1G25988	0	0	0	0	0	0	0	1	0	0	0	0	0	0	0	0	0	0	NA	NA	NA	NA	NA	NA	NA	176.3	NA	NA	NA	NA	NA	NA	NA	NA	NA	NA	F14G11.5|F14G11_5	0	0	0
AT1G26090	0	1	0	0	0	0	1	0	0	0	0	0	0	0	0	0	0	0	NA	119.6	NA	NA	NA	NA	51.2	NA	NA	NA	NA	NA	NA	NA	NA	NA	NA	NA	F14G11.6	0	0	0
AT1G26130	0	0	1	0	0	0	0	1	0	0	0	0	0	0	0	0	0	0	NA	NA	60.5	NA	NA	NA	NA	116.9	NA	NA	NA	NA	NA	NA	NA	NA	NA	NA	F28B23.19|F28B23_19	0	0	1
AT1G26140	0	0	0	0	0	0	0	1	0	0	0	0	0	0	0	0	0	0	NA	NA	NA	NA	NA	NA	NA	136.6	NA	NA	NA	NA	NA	NA	NA	NA	NA	NA	F28B23.18|F28B23_18	0	0	0
AT1G26150	1	1	1	1	1	1	1	0	0	0	1	1	0	0	0	0	1	1	89.9	230.1	242	228.4	151	160.9	92.5	NA	NA	NA	218.8	197.2	NA	NA	NA	NA	398.7	386.9	ATPERK10|AtPERK10|F28B23.17|F28B23_17|proline-rich extensin-like receptor kinase 10	0	0	1
AT1G26170	0	0	0	0	0	0	0	1	0	0	0	0	0	0	0	0	0	0	NA	NA	NA	NA	NA	NA	NA	108.6	NA	NA	NA	NA	NA	NA	NA	NA	NA	NA	F28B23.15|F28B23_15	0	0	0
AT1G26180	0	0	0	0	0	0	0	1	0	0	0	0	0	0	0	0	0	0	NA	NA	NA	NA	NA	NA	NA	116.6	NA	NA	NA	NA	NA	NA	NA	NA	NA	NA	F28B23.14|F28B23_14	0	0	0
AT1G26200	0	0	1	1	1	0	0	1	0	0	0	0	0	0	0	0	0	0	NA	NA	197.7	229	89.8	NA	NA	383.4	NA	NA	NA	NA	NA	NA	NA	NA	NA	NA	F28B23.26	0	0	0
AT1G26208	0	0	0	0	0	0	0	0	0	0	0	1	0	0	0	0	0	0	NA	NA	NA	NA	NA	NA	NA	NA	NA	NA	NA	134.9	NA	NA	NA	NA	NA	NA	-	0	0	0
AT1G26210	0	1	1	1	1	1	0	1	0	0	1	0	0	0	0	0	0	1	NA	151.7	417.1	368.2	91.9	122.7	NA	169.8	NA	NA	169.4	NA	NA	NA	NA	NA	NA	384.5	ATSOFL1|F28B23.12|F28B23_12|SOB FIVE-LIKE 1|SOB five-like 1	0	0	1
AT1G26235	0	0	1	1	0	0	0	1	0	0	1	0	0	0	0	0	0	1	NA	NA	73.3	69.8	NA	NA	NA	204.8	NA	NA	86.5	NA	NA	NA	NA	NA	NA	77.5	-	0	0	0
AT1G26240	0	0	0	0	0	0	0	1	0	0	0	0	0	0	0	0	0	0	NA	NA	NA	NA	NA	NA	NA	213.8	NA	NA	NA	NA	NA	NA	NA	NA	NA	NA	F28B23.10|F28B23_10	0	0	1
AT1G26250	0	0	1	1	0	0	0	0	0	0	0	0	0	0	0	0	0	0	NA	NA	85.5	61.9	NA	NA	NA	NA	NA	NA	NA	NA	NA	NA	NA	NA	NA	NA	F28B23.9|F28B23_9	0	0	0
AT1G26260	0	0	0	0	0	0	0	1	0	0	0	0	0	0	0	0	0	0	NA	NA	NA	NA	NA	NA	NA	384.1	NA	NA	NA	NA	NA	NA	NA	NA	NA	NA	F28B23.8|F28B23_8|cryptochrome-interacting basic-helix-loop-helix 5	0	0	0
AT1G26270	0	0	1	1	0	0	1	0	0	0	1	0	0	0	0	0	0	1	NA	NA	267.7	215.8	NA	NA	74.8	NA	NA	NA	188.2	NA	NA	NA	NA	NA	NA	180.3	F28B23.7|F28B23_7	0	0	1
AT1G26290	0	1	1	1	1	1	0	1	1	0	1	1	1	0	1	0	1	1	NA	283.7	316.9	306.7	212.3	324.9	NA	123.1	129.3	NA	293.9	224.2	72.9	NA	93.2	NA	284.2	328	F28B23.5|F28B23_5	0	0	0
AT1G26340	0	0	0	0	0	0	0	1	0	0	0	0	0	0	0	0	0	0	NA	NA	NA	NA	NA	NA	NA	81.7	NA	NA	NA	NA	NA	NA	NA	NA	NA	NA	ARABIDOPSIS CYTOCHROME B5 ISOFORM A|ATCB5-A|B5 #6|F28B23.1|cytochrome B5 isoform A	0	0	0
AT1G26360	0	0	0	0	0	0	0	1	0	0	0	0	0	0	0	0	0	0	NA	NA	NA	NA	NA	NA	NA	300.7	NA	NA	NA	NA	NA	NA	NA	NA	NA	NA	ARABIDOPSIS THALIANA METHYL ESTERASE 13|ATMES13|T1K7.26|T1K7_26|methyl esterase 13	0	0	0
AT1G26380	0	0	1	1	0	0	0	0	0	0	0	0	0	0	0	0	0	0	NA	NA	121.6	163	NA	NA	NA	NA	NA	NA	NA	NA	NA	NA	NA	NA	NA	NA	T1K7.24|T1K7_24	0	0	0
AT1G26390	0	0	1	0	0	1	1	1	0	0	0	1	0	0	0	0	0	1	NA	NA	92.9	NA	NA	77.3	47.2	59.4	NA	NA	NA	83.6	NA	NA	NA	NA	NA	94.3	T1K7.23|T1K7_23	0	0	0
AT1G26420	0	1	1	1	1	1	0	0	0	0	1	1	0	0	0	0	0	1	NA	127	507.2	449.6	161.4	99.9	NA	NA	NA	NA	161.2	101.8	NA	NA	NA	NA	NA	235.1	T1K7.20|T1K7_20	0	0	0
AT1G26440	0	0	0	0	0	0	0	1	0	0	0	0	0	0	0	0	0	0	NA	NA	NA	NA	NA	NA	NA	118.9	NA	NA	NA	NA	NA	NA	NA	NA	NA	NA	ATUPS5|T1K7.19|T1K7_19|ureide permease 5	0	0	0
AT1G26460	0	0	1	1	1	1	0	1	0	0	1	0	0	0	0	0	0	1	NA	NA	147.6	104.2	98.5	80.6	NA	270.5	NA	NA	107.6	NA	NA	NA	NA	NA	NA	87.4	T1K7.17|T1K7_17	0	0	0
AT1G26480	0	0	0	0	0	0	0	1	0	0	0	0	0	0	0	0	0	0	NA	NA	NA	NA	NA	NA	NA	173.8	NA	NA	NA	NA	NA	NA	NA	NA	NA	NA	GF14 IOTA|T1K7.15|T1K7_15|general regulatory factor 12	0	0	0
AT1G26490	0	1	0	0	0	0	1	0	0	0	1	1	0	0	0	0	0	0	NA	116.8	NA	NA	NA	NA	68.9	NA	NA	NA	95.3	90.4	NA	NA	NA	NA	NA	NA	51948.TRNA-ALA-1	0	0	0
AT1G26550	0	0	1	1	0	0	0	1	0	0	0	0	0	0	0	0	0	0	NA	NA	86.6	80	NA	NA	NA	108.9	NA	NA	NA	NA	NA	NA	NA	NA	NA	NA	T1K7.8|T1K7_8	0	0	0
AT1G26558	0	0	0	1	0	0	1	0	0	0	0	0	0	0	0	0	0	0	NA	NA	NA	79.6	NA	NA	55.1	NA	NA	NA	NA	NA	NA	NA	NA	NA	NA	NA	-	0	0	0
AT1G26560	0	0	0	0	0	0	1	0	0	0	0	0	0	0	0	0	1	0	NA	NA	NA	NA	NA	NA	53.1	NA	NA	NA	NA	NA	NA	NA	NA	NA	113.1	NA	T1K7.7|T1K7_7|beta glucosidase 40	0	0	1
AT1G26580	0	1	0	0	0	0	0	0	0	0	0	0	0	0	0	0	0	0	NA	95.3	NA	NA	NA	NA	NA	NA	NA	NA	NA	NA	NA	NA	NA	NA	NA	NA	T1K7.5|T1K7_5	0	0	0
AT1G26590	0	0	0	0	0	0	0	0	0	0	0	0	0	0	0	0	0	1	NA	NA	NA	NA	NA	NA	NA	NA	NA	NA	NA	NA	NA	NA	NA	NA	NA	96.3	T1K7.4|T1K7_4	0	0	0
AT1G26610	0	0	0	0	0	0	0	1	0	0	0	0	0	0	0	0	0	0	NA	NA	NA	NA	NA	NA	NA	88.7	NA	NA	NA	NA	NA	NA	NA	NA	NA	NA	T1K7.2|T1K7_2	0	0	0
AT1G26620	0	1	1	1	1	0	0	0	0	0	0	1	1	0	0	0	1	1	NA	98.5	110.7	92.7	74.4	NA	NA	NA	NA	NA	NA	111.9	58.5	NA	NA	NA	352.3	114.1	T1K7.1|T1K7_1	0	0	0
AT1G26630	0	0	0	0	0	0	0	1	0	0	0	0	0	0	0	0	0	0	NA	NA	NA	NA	NA	NA	NA	117.6	NA	NA	NA	NA	NA	NA	NA	NA	NA	NA	ATELF5A-2|ELF5A-2|EUKARYOTIC ELONGATION FACTOR 5A-2|FUMONISIN B1-RESISTANT12|T24P13.1|T24P13_1	0	0	0
AT1G26650	0	0	1	0	0	0	0	1	0	0	1	1	0	0	0	0	0	1	NA	NA	68	NA	NA	NA	NA	258	NA	NA	166.1	154.9	NA	NA	NA	NA	NA	77.5	T24P13.3|T24P13_3	0	0	0
AT1G26680	0	0	0	0	0	0	0	1	0	0	0	0	0	0	0	0	0	0	NA	NA	NA	NA	NA	NA	NA	258.3	NA	NA	NA	NA	NA	NA	NA	NA	NA	NA	T24P13.6|T24P13_6	0	0	0
AT1G26690	0	1	1	1	1	1	0	0	0	0	0	0	0	0	0	0	0	1	NA	74.1	86.9	88.1	64.8	75.4	NA	NA	NA	NA	NA	NA	NA	NA	NA	NA	NA	58.3	T24P13.7|T24P13_7	0	0	1
AT1G26700	0	0	0	0	0	0	0	0	0	0	0	0	1	0	0	0	0	0	NA	NA	NA	NA	NA	NA	NA	NA	NA	NA	NA	NA	47.1	NA	NA	NA	NA	NA	ATMLO14|MILDEW RESISTANCE LOCUS O 14|T24P13.8|T24P13_8	0	0	0
AT1G26730	1	1	1	1	1	1	1	0	0	0	1	1	0	0	0	0	0	1	117.8	164.8	223.1	228.2	64.8	110.1	74.8	NA	NA	NA	227.2	193.2	NA	NA	NA	NA	NA	261.5	T24P13.11|T24P13_11	0	0	0
AT1G26761	0	0	0	0	0	0	0	1	0	0	0	0	0	0	0	0	0	0	NA	NA	NA	NA	NA	NA	NA	129.1	NA	NA	NA	NA	NA	NA	NA	NA	NA	NA	-	0	0	0
AT1G26770	0	0	1	0	0	0	1	0	0	0	0	0	1	0	0	0	1	1	NA	NA	172.8	NA	NA	NA	53.1	NA	NA	NA	NA	NA	60.4	NA	NA	NA	273.5	218.3	ARABIDOPSIS THALIANA EXPANSIN 10|ARABIDOPSIS THALIANA EXPANSIN ALPHA 1.1|AT-EXP10|ATEXP10|ATEXPA10|ATHEXP ALPHA 1.1|EXP10|EXPANSIN 10|T24P13.15|T24P13_15|expansin A10	0	0	0
AT1G26771	0	0	0	0	0	0	0	1	0	0	0	0	0	0	0	0	0	0	NA	NA	NA	NA	NA	NA	NA	329.2	NA	NA	NA	NA	NA	NA	NA	NA	NA	NA	NoInfo	0	0	0
AT1G26773	0	0	0	0	1	1	1	0	0	0	0	0	0	0	0	0	0	0	NA	NA	NA	NA	98.9	122.6	149.5	NA	NA	NA	NA	NA	NA	NA	NA	NA	NA	NA	-	0	0	0
AT1G26780	0	0	0	0	0	0	0	1	0	0	0	0	0	0	0	0	0	0	NA	NA	NA	NA	NA	NA	NA	207.6	NA	NA	NA	NA	NA	NA	NA	NA	NA	NA	AtMYB117|LATERAL ORGAN FUSION 1|LOF1|T24P13.16|T24P13_16|myb domain protein 117	0	0	0
AT1G26790	1	1	1	1	1	1	1	0	0	0	1	1	0	0	0	0	0	1	88.4	133	103.2	111.5	80.5	126.8	66.9	NA	NA	NA	155	133.4	NA	NA	NA	NA	NA	240.6	T24P13.17|T24P13_17	0	0	0
AT1G26795	0	0	0	0	0	0	0	0	0	0	0	0	1	0	0	0	0	0	NA	NA	NA	NA	NA	NA	NA	NA	NA	NA	NA	NA	54.7	NA	NA	NA	NA	NA	-	0	0	0
AT1G26799	0	0	0	1	0	0	0	0	0	0	0	0	0	0	0	0	0	0	NA	NA	NA	108.3	NA	NA	NA	NA	NA	NA	NA	NA	NA	NA	NA	NA	NA	NA	-	0	0	0
AT1G26800	0	1	1	1	1	1	1	0	0	0	1	1	0	0	0	0	0	1	NA	128.8	198.6	183.4	121.7	97.2	59	NA	NA	NA	163.8	151.5	NA	NA	NA	NA	NA	191.6	T24P13.19|T24P13_19	0	0	0
AT1G26830	0	1	0	0	0	0	0	0	0	0	0	0	0	0	0	0	0	0	NA	90.3	NA	NA	NA	NA	NA	NA	NA	NA	NA	NA	NA	NA	NA	NA	NA	NA	ATCUL3|ATCUL3A|CUL3A|T24P13.25|cullin 3|cullin 3A	0	0	0
AT1G26840	0	1	0	0	0	0	0	1	0	0	0	0	1	0	0	0	0	0	NA	82.2	NA	NA	NA	NA	NA	407.6	NA	NA	NA	NA	47.1	NA	NA	NA	NA	NA	ARABIDOPSIS THALIANA ORIGIN RECOGNITION COMPLEX PROTEIN 6|ATORC6|ORIGIN RECOGNITION COMPLEX SUBUNIT 6|T2P11.3|T2P11_3|origin recognition complex protein 6	0	0	0
AT1G26850	0	0	0	0	0	0	1	0	0	0	0	0	0	0	0	0	0	0	NA	NA	NA	NA	NA	NA	53.1	NA	NA	NA	NA	NA	NA	NA	NA	NA	NA	NA	T2P11.4|T2P11_4	0	0	0
AT1G26860	0	0	0	0	0	0	0	1	0	0	0	0	0	0	0	0	0	1	NA	NA	NA	NA	NA	NA	NA	101.4	NA	NA	NA	NA	NA	NA	NA	NA	NA	78.1	T2P11.5|T2P11_5	0	0	0
AT1G26870	0	0	0	0	0	0	0	1	0	0	0	0	0	0	0	0	0	0	NA	NA	NA	NA	NA	NA	NA	367.9	NA	NA	NA	NA	NA	NA	NA	NA	NA	NA	ANAC009|Arabidopsis NAC domain containing protein 9|T2P11.6|T2P11_6	1	0	0
AT1G26880	0	0	0	0	0	0	0	1	0	0	0	0	0	0	0	0	0	0	NA	NA	NA	NA	NA	NA	NA	130.6	NA	NA	NA	NA	NA	NA	NA	NA	NA	NA	T2P11.7|T2P11_7	0	0	1
AT1G26911	0	0	0	0	0	0	0	1	0	0	0	0	0	0	0	0	0	0	NA	NA	NA	NA	NA	NA	NA	101.2	NA	NA	NA	NA	NA	NA	NA	NA	NA	NA	-	0	0	0
AT1G26916	1	0	0	0	0	0	1	0	0	0	0	0	0	0	0	0	1	0	170.6	NA	NA	NA	NA	NA	212.5	NA	NA	NA	NA	NA	NA	NA	NA	NA	178.8	NA	NoInfo	0	0	0
AT1G26920	0	0	0	0	0	1	0	0	0	0	0	0	0	0	0	0	0	0	NA	NA	NA	NA	NA	121	NA	NA	NA	NA	NA	NA	NA	NA	NA	NA	NA	NA	T2P11.11|T2P11_11	0	0	0
AT1G26921	0	0	0	0	0	0	1	1	0	0	0	0	0	0	0	0	0	0	NA	NA	NA	NA	NA	NA	72.8	131.9	NA	NA	NA	NA	NA	NA	NA	NA	NA	NA	-	0	0	0
AT1G26930	0	0	1	1	0	1	1	0	0	0	0	0	0	0	0	0	0	1	NA	NA	195.2	204	NA	97.6	94.4	NA	NA	NA	NA	NA	NA	NA	NA	NA	NA	171	T2P11.12|T2P11_12	0	0	0
AT1G26940	0	0	1	1	0	1	1	1	1	1	1	1	1	1	1	0	0	1	NA	NA	131.6	147.6	NA	120.1	84.6	298.5	107.2	173.8	180.4	216.5	79.8	228.2	131.2	NA	NA	201.9	T2P11.13|T2P11_13	0	0	0
AT1G26945	1	1	0	0	1	1	1	1	0	0	1	1	1	1	1	0	0	1	228.7	160.9	NA	NA	129.8	174.9	171.2	191.3	NA	NA	242.4	217.4	101.4	316.5	161.4	NA	NA	209.8	KIDARI|PACLOBUTRAZOL RESISTANCE 6|PRE6	0	0	0
AT1G26950	0	0	1	1	0	0	0	0	0	0	0	0	0	0	0	0	0	1	NA	NA	254.3	290.5	NA	NA	NA	NA	NA	NA	NA	NA	NA	NA	NA	NA	NA	268.4	T2P11.14|T2P11_14	0	0	0
AT1G26960	0	0	0	0	0	0	0	1	0	0	0	0	0	0	0	0	0	0	NA	NA	NA	NA	NA	NA	NA	237	NA	NA	NA	NA	NA	NA	NA	NA	NA	NA	HB23|T2P11.15|T2P11_15|homeobox protein 23	0	0	0
AT1G26970	0	0	0	1	1	1	0	0	0	0	0	0	0	0	0	0	0	1	NA	NA	NA	159.3	112.7	107.2	NA	NA	NA	NA	NA	NA	NA	NA	NA	NA	NA	159.7	T2P11.16	0	0	0
AT1G26973	0	0	0	0	0	0	0	1	0	0	0	0	0	0	0	0	0	0	NA	NA	NA	NA	NA	NA	NA	233.5	NA	NA	NA	NA	NA	NA	NA	NA	NA	NA	MICRORNA 395|MIR395|MIR395A|microRNA395A|p_MI0001007	0	0	0
AT1G26976	0	0	1	1	0	0	0	0	0	0	0	0	0	0	0	0	0	0	NA	NA	129.1	107	NA	NA	NA	NA	NA	NA	NA	NA	NA	NA	NA	NA	NA	NA	-	0	0	0
AT1G27000	0	0	1	0	0	0	0	1	0	0	0	0	0	0	0	0	0	0	NA	NA	98.8	NA	NA	NA	NA	108.4	NA	NA	NA	NA	NA	NA	NA	NA	NA	NA	T2P11.17	0	0	0
AT1G27020	0	0	1	1	0	0	0	1	0	0	0	0	0	0	0	0	0	1	NA	NA	187.2	192.6	NA	NA	NA	247.3	NA	NA	NA	NA	NA	NA	NA	NA	NA	127.5	T7N9.8|T7N9_8	0	0	0
AT1G27040	0	0	0	0	0	0	0	1	0	0	0	0	0	0	0	0	0	0	NA	NA	NA	NA	NA	NA	NA	373.9	NA	NA	NA	NA	NA	NA	NA	NA	NA	NA	AtNPF4.5|NPF4.5|NRT1/ PTR family 4.5|T7N9.10|T7N9_10	0	0	0
AT1G27050	0	1	1	1	1	0	0	0	0	0	1	1	1	0	0	0	0	1	NA	148.2	106.4	130.9	85.7	NA	NA	NA	NA	NA	147.5	147	58.9	NA	NA	NA	NA	118.2	ATHB54|T7N9.11|T7N9_11|homeobox protein 54	0	0	1
AT1G27070	0	1	0	0	0	0	0	0	0	0	0	0	1	0	0	0	0	0	NA	83.6	NA	NA	NA	NA	NA	NA	NA	NA	NA	NA	51.7	NA	NA	NA	NA	NA	T7N9.13|T7N9_13	0	0	0
AT1G27090	0	0	0	0	0	0	0	1	0	0	0	0	0	0	0	0	0	0	NA	NA	NA	NA	NA	NA	NA	82.9	NA	NA	NA	NA	NA	NA	NA	NA	NA	NA	T7N9.15|T7N9_15	0	0	0
AT1G27100	0	0	1	1	0	0	0	1	0	0	0	0	0	0	0	0	1	0	NA	NA	238.7	236.1	NA	NA	NA	319.4	NA	NA	NA	NA	NA	NA	NA	NA	249.4	NA	T7N9.16|T7N9_16	0	0	0
AT1G27120	1	0	1	1	1	0	1	1	0	0	1	1	0	0	0	0	0	1	118.6	NA	180.4	197.6	81.7	NA	53.1	80.2	NA	NA	134.4	119.6	NA	NA	NA	NA	NA	319.1	T7N9.18|T7N9_18	0	0	0
AT1G27130	0	1	1	1	1	1	0	0	0	0	1	1	0	0	0	0	0	1	NA	140.1	314.7	303.2	100.8	132.1	NA	NA	NA	NA	180.9	167.9	NA	NA	NA	NA	NA	318.1	ATGSTU13|GLUTATHIONE S-TRANSFERASE 12|GST12|T7N9.190|T7N9_190|glutathione S-transferase tau 13	0	0	0
AT1G27150	0	0	0	0	0	0	1	1	0	0	0	0	0	0	0	0	0	0	NA	NA	NA	NA	NA	NA	74.8	156.9	NA	NA	NA	NA	NA	NA	NA	NA	NA	NA	T7N9.21|T7N9_21	0	0	0
AT1G27160	0	0	0	0	0	0	0	1	0	0	0	0	0	0	0	0	0	0	NA	NA	NA	NA	NA	NA	NA	93.7	NA	NA	NA	NA	NA	NA	NA	NA	NA	NA	T7N9.22|T7N9_22	0	0	0
AT1G27170	0	1	1	1	1	0	0	0	0	0	0	0	0	0	0	0	0	1	NA	111.5	185.5	167.6	112.3	NA	NA	NA	NA	NA	NA	NA	NA	NA	NA	NA	NA	120.3	T7N9.23|T7N9_23	0	0	0
AT1G27180	0	0	1	1	1	0	0	0	0	0	0	0	0	0	0	0	0	1	NA	NA	122.5	104.8	91.1	NA	NA	NA	NA	NA	NA	NA	NA	NA	NA	NA	NA	67.2	T7N9.24|T7N9_24	0	0	0
AT1G27190	0	1	1	0	0	1	1	1	0	0	1	1	0	0	0	0	0	1	NA	121.4	81	NA	NA	89.9	84.6	198.6	NA	NA	211.2	195.6	NA	NA	NA	NA	NA	225.9	T7N9.25|T7N9_25	0	0	0
AT1G27200	0	0	1	1	1	1	1	1	0	0	0	0	0	0	0	0	0	1	NA	NA	471	409.7	284.6	218.8	120	162.3	NA	NA	NA	NA	NA	NA	NA	NA	NA	234.1	T7N9.26|T7N9_26	0	0	0
AT1G27210	0	0	1	1	0	0	0	0	0	0	0	0	0	0	0	0	1	0	NA	NA	252.4	248.7	NA	NA	NA	NA	NA	NA	NA	NA	NA	NA	NA	NA	435.4	NA	T7N9.27|T7N9_27	0	0	0
AT1G27213	1	0	0	0	0	0	1	1	0	0	0	0	0	0	0	0	0	0	135.7	NA	NA	NA	NA	NA	100.3	148.1	NA	NA	NA	NA	NA	NA	NA	NA	NA	NA	NoInfo	0	0	0
AT1G27250	0	0	0	0	0	0	0	1	0	0	0	0	0	0	0	0	0	0	NA	NA	NA	NA	NA	NA	NA	66.4	NA	NA	NA	NA	NA	NA	NA	NA	NA	NA	F17L21.4	0	0	0
AT1G27285	0	0	0	0	0	0	0	1	0	0	0	0	0	0	0	0	0	0	NA	NA	NA	NA	NA	NA	NA	149.1	NA	NA	NA	NA	NA	NA	NA	NA	NA	NA	F17L21.7|F17L21_7	0	0	0
AT1G27290	0	1	1	1	1	1	1	0	1	1	1	1	0	0	0	0	0	1	NA	219.2	378.1	394.8	279.4	309.7	293.1	NA	184.3	170.3	369.8	370.3	NA	NA	NA	NA	NA	373.6	F17L21.8|F17L21_8	0	0	0
AT1G27300	0	0	1	0	0	0	0	0	0	0	0	0	0	0	0	0	0	0	NA	NA	233.1	NA	NA	NA	NA	NA	NA	NA	NA	NA	NA	NA	NA	NA	NA	NA	F17L21.9|F17L21_9	0	0	0
AT1G27310	0	0	0	1	0	0	0	1	0	0	0	0	0	0	0	0	0	0	NA	NA	NA	162.2	NA	NA	NA	110.1	NA	NA	NA	NA	NA	NA	NA	NA	NA	NA	F17L21.10|F17L21_10|nuclear transport factor 2A	0	0	0
AT1G27330	0	1	1	1	1	1	1	1	0	0	1	1	0	0	0	0	0	1	NA	174	212.4	184.5	143.9	141.9	88.5	432.8	NA	NA	178.5	166.9	NA	NA	NA	NA	NA	197.4	F17L21.12|F17L21_12	0	0	0
AT1G27350	0	0	1	1	1	0	1	1	0	0	1	1	0	0	0	0	0	0	NA	NA	168.1	184.1	108	NA	106.2	435.3	NA	NA	170.2	161.1	NA	NA	NA	NA	NA	NA	F17L21.31	0	0	0
AT1G27360	0	1	0	0	0	0	0	1	0	0	1	0	0	0	0	0	1	1	NA	148.2	NA	NA	NA	NA	NA	159.1	NA	NA	154.7	NA	NA	NA	NA	NA	298.2	211.8	F17L21.14|F17L21_14|squamosa promoter-like 11	0	0	0
AT1G27370	0	1	1	1	0	0	1	1	0	0	1	1	0	0	0	0	1	1	NA	150	80	83.7	NA	NA	72.8	177.1	NA	NA	256.5	236.5	NA	NA	NA	NA	444.1	252.3	F17L21.15|F17L21_15|squamosa promoter binding protein-like 10	0	0	0
AT1G27385	0	0	0	0	0	0	0	1	0	0	0	0	0	0	0	0	0	0	NA	NA	NA	NA	NA	NA	NA	99.2	NA	NA	NA	NA	NA	NA	NA	NA	NA	NA	-	0	0	0
AT1G27420	0	0	1	1	0	0	0	1	0	0	0	0	0	0	0	0	0	0	NA	NA	122.5	122.5	NA	NA	NA	73.2	NA	NA	NA	NA	NA	NA	NA	NA	NA	NA	F17L21.21|F17L21_21	0	0	0
AT1G27430	0	0	0	0	0	0	0	1	0	0	0	0	0	0	0	0	0	0	NA	NA	NA	NA	NA	NA	NA	59.7	NA	NA	NA	NA	NA	NA	NA	NA	NA	NA	F17L21.22|F17L21_22	0	0	0
AT1G27435	0	0	0	0	0	0	0	1	0	0	0	0	0	0	0	0	0	0	NA	NA	NA	NA	NA	NA	NA	89.4	NA	NA	NA	NA	NA	NA	NA	NA	NA	NA	-	0	0	0
AT1G27440	0	1	1	1	0	0	1	0	0	0	0	0	0	0	0	0	0	1	NA	128.5	213.9	214.6	NA	NA	96.4	NA	NA	NA	NA	NA	NA	NA	NA	NA	NA	135.7	ATGUT1|F17L21.23|F17L21_23|IRX10	0	0	0
AT1G27460	1	0	0	0	0	0	0	0	0	0	1	1	0	0	0	0	0	1	98.5	NA	NA	NA	NA	NA	NA	NA	NA	NA	171.3	172.7	NA	NA	NA	NA	NA	116.9	F17L21.25|F17L21_25|no pollen germination related 1	0	0	0
AT1G27461	0	0	0	0	1	1	0	1	0	0	0	0	0	0	0	0	0	0	NA	NA	NA	NA	91.9	128.5	NA	112.1	NA	NA	NA	NA	NA	NA	NA	NA	NA	NA	-	0	0	0
AT1G27470	0	1	1	1	0	1	0	0	0	0	0	0	0	0	0	0	0	1	NA	97	81.9	79.1	NA	81.9	NA	NA	NA	NA	NA	NA	NA	NA	NA	NA	NA	85.3	F17L21.26|F17L21_26	0	0	0
AT1G27480	0	0	0	0	0	0	0	1	0	0	0	0	0	0	0	0	0	0	NA	NA	NA	NA	NA	NA	NA	222.5	NA	NA	NA	NA	NA	NA	NA	NA	NA	NA	F17L21.27|F17L21_27	0	0	0
AT1G27500	0	0	1	1	0	1	1	1	0	0	1	1	1	0	0	0	0	1	NA	NA	62.2	69.8	NA	104.5	63	1918.2	NA	NA	118.1	109.3	66.1	NA	NA	NA	NA	112.1	F17L21.29|F17L21_29|kinesin light chain-related 3	0	0	0
AT1G27520	0	1	0	0	0	0	0	0	0	0	0	0	0	0	0	0	0	0	NA	91.8	NA	NA	NA	NA	NA	NA	NA	NA	NA	NA	NA	NA	NA	NA	NA	NA	MNS5|T17H3.2|T17H3_2|mannosidase 5	0	0	0
AT1G27540	0	0	0	0	0	0	1	0	0	0	0	0	0	0	0	0	0	0	NA	NA	NA	NA	NA	NA	51.2	NA	NA	NA	NA	NA	NA	NA	NA	NA	NA	NA	T17H3.4|T17H3_4	0	0	0
AT1G27560	0	0	1	0	0	0	0	0	0	0	0	0	0	0	0	0	0	0	NA	NA	44.4	NA	NA	NA	NA	NA	NA	NA	NA	NA	NA	NA	NA	NA	NA	NA	T17H3.6|T17H3_6	0	0	0
AT1G27570	0	0	0	0	0	0	0	1	1	0	0	0	0	0	0	0	0	0	NA	NA	NA	NA	NA	NA	NA	105.9	124.9	NA	NA	NA	NA	NA	NA	NA	NA	NA	T17H3.7|T17H3_7	0	0	0
AT1G27590	0	1	0	0	0	0	0	1	0	0	0	0	0	0	0	0	0	0	NA	59.3	NA	NA	NA	NA	NA	150.9	NA	NA	NA	NA	NA	NA	NA	NA	NA	NA	NoInfo	0	0	0
AT1G27630	0	0	0	0	0	0	0	1	0	0	0	0	0	0	0	0	0	0	NA	NA	NA	NA	NA	NA	NA	165.6	NA	NA	NA	NA	NA	NA	NA	NA	NA	NA	T22C5.8|cyclin T 1;3	0	0	0
AT1G27640	0	0	0	1	1	1	0	0	0	0	0	0	0	0	0	0	0	0	NA	NA	NA	100.6	105.3	151.1	NA	NA	NA	NA	NA	NA	NA	NA	NA	NA	NA	NA	T22C5.9	0	0	0
AT1G27650	0	1	1	0	0	0	0	0	0	0	0	0	0	0	0	0	0	0	NA	86.8	73.2	NA	NA	NA	NA	NA	NA	NA	NA	NA	NA	NA	NA	NA	NA	NA	T22C5.30	0	0	0
AT1G27660	0	0	0	0	0	0	0	1	0	0	0	0	0	0	0	0	0	0	NA	NA	NA	NA	NA	NA	NA	198.1	NA	NA	NA	NA	NA	NA	NA	NA	NA	NA	T22C5.11|T22C5_11	0	0	0
AT1G27670	1	0	1	1	0	1	1	0	0	0	0	0	0	0	0	0	0	1	198.5	NA	96.7	121.3	NA	91.9	139.7	NA	NA	NA	NA	NA	NA	NA	NA	NA	NA	99.1	T22C5.12|T22C5_12	0	0	0
AT1G27671	0	0	0	0	0	0	1	0	0	0	0	0	0	0	0	0	0	0	NA	NA	NA	NA	NA	NA	123.9	NA	NA	NA	NA	NA	NA	NA	NA	NA	NA	NA	-	0	0	0
AT1G27680	0	0	0	0	0	0	0	1	0	0	0	0	0	0	0	0	0	0	NA	NA	NA	NA	NA	NA	NA	984.1	NA	NA	NA	NA	NA	NA	NA	NA	NA	NA	ADPGLC-PPase large subunit|T22C5.13|T22C5_13	0	0	0
AT1G27690	0	0	0	0	0	0	1	0	0	0	0	0	0	0	0	0	1	0	NA	NA	NA	NA	NA	NA	64.9	NA	NA	NA	NA	NA	NA	NA	NA	NA	177.8	NA	T22C5.14|T22C5_14	0	0	0
AT1G27720	0	0	0	0	0	0	0	1	0	0	0	0	0	0	0	0	0	0	NA	NA	NA	NA	NA	NA	NA	78.2	NA	NA	NA	NA	NA	NA	NA	NA	NA	NA	T22C5.17|T22C5_17|TAF4|TBP-associated factor 4|TBP-associated factor 4B	0	0	0
AT1G27730	0	1	1	1	1	1	0	0	0	0	0	0	1	0	0	0	0	1	NA	221.6	368.6	323	177.2	141.2	NA	NA	NA	NA	NA	NA	61.9	NA	NA	NA	NA	245.7	T22C5.18|T22C5_18|ZAT10|salt tolerance zinc finger	0	0	1
AT1G27740	0	0	0	0	0	0	0	1	0	0	0	0	0	0	0	0	0	0	NA	NA	NA	NA	NA	NA	NA	331.9	NA	NA	NA	NA	NA	NA	NA	NA	NA	NA	T22C5.19|T22C5_19|root hair defective 6-like 4	1	0	0
AT1G27750	0	0	0	0	0	0	1	0	0	0	0	0	0	0	0	0	0	0	NA	NA	NA	NA	NA	NA	57.1	NA	NA	NA	NA	NA	NA	NA	NA	NA	NA	NA	T22C5.20|T22C5_20	0	0	0
AT1G27752	0	1	1	1	0	0	0	1	0	0	1	1	0	0	0	0	0	1	NA	166.2	77.6	78.8	NA	NA	NA	137.6	NA	NA	81.1	101.3	NA	NA	NA	NA	NA	69.6	-	0	0	0
AT1G27770	0	0	1	1	0	0	1	0	0	0	0	0	0	0	0	0	0	1	NA	NA	105.8	110.7	NA	NA	45.2	NA	NA	NA	NA	NA	NA	NA	NA	NA	NA	100.4	CA2+-ATPASE|PEA1|PLASTID ENVELOPE ATPASE 1|T22C5.23|T22C5_23|autoinhibited Ca2+-ATPase 1	0	0	0
AT1G27840	0	1	1	1	1	1	1	1	0	0	1	1	0	0	0	0	0	1	NA	121.8	285.4	282	120.8	117.8	70.8	244.3	NA	NA	188.8	175.2	NA	NA	NA	NA	NA	178.2	F28L5.15|F28L5_15	0	0	0
AT1G27850	0	0	1	1	0	0	0	1	0	0	0	0	0	0	0	0	0	0	NA	NA	163	116.8	NA	NA	NA	130.6	NA	NA	NA	NA	NA	NA	NA	NA	NA	NA	F28L5.11|F28L5_11	0	0	0
AT1G27880	0	0	0	0	0	0	0	1	0	0	0	0	0	0	0	0	0	0	NA	NA	NA	NA	NA	NA	NA	85.7	NA	NA	NA	NA	NA	NA	NA	NA	NA	NA	F28L5.4|F28L5_4	0	0	0
AT1G27890	0	1	1	1	0	0	0	0	0	0	0	1	0	0	0	0	0	1	NA	97.8	56.5	48.7	NA	NA	NA	NA	NA	NA	NA	65.9	NA	NA	NA	NA	NA	52.8	F28L5.5	0	0	0
AT1G27900	0	0	0	0	0	0	0	1	0	0	0	0	0	0	0	0	0	0	NA	NA	NA	NA	NA	NA	NA	151.4	NA	NA	NA	NA	NA	NA	NA	NA	NA	NA	F13K9.28|F13K9_28	0	0	0
AT1G27910	1	0	1	1	0	0	0	0	0	0	0	0	0	0	0	0	0	0	94.6	NA	200.9	173.1	NA	NA	NA	NA	NA	NA	NA	NA	NA	NA	NA	NA	NA	NA	ARABIDOPSIS THALIANA PLANT U-BOX 45|ATPUB45|F13K9.2|F13K9_2|plant U-box 45	0	0	0
AT1G27920	0	0	0	0	1	1	1	1	0	0	1	1	0	0	0	0	0	1	NA	NA	NA	NA	182.3	179.9	68.9	3000.4	NA	NA	198.7	217.9	NA	NA	NA	NA	NA	158.7	F13K9.3|F13K9_3|microtubule-associated protein 65-8	0	0	0
AT1G27930	0	1	1	1	1	1	1	0	0	0	1	0	0	0	0	0	0	1	NA	114	163.9	140	123.7	155.9	63	NA	NA	NA	132.2	NA	NA	NA	NA	NA	NA	128.2	F13K9.4|F13K9_4	0	0	0
AT1G27940	0	0	0	0	0	0	0	1	0	0	0	0	0	0	0	0	0	0	NA	NA	NA	NA	NA	NA	NA	291.7	NA	NA	NA	NA	NA	NA	NA	NA	NA	NA	ATP-binding cassette B13|F13K9.5|F13K9_5|P-glycoprotein 13|PGP13	0	0	0
AT1G27950	0	0	0	0	0	0	0	1	0	0	0	0	0	0	0	0	1	1	NA	NA	NA	NA	NA	NA	NA	209.3	NA	NA	NA	NA	NA	NA	NA	NA	118.9	137.1	F13K9.6|F13K9_6|glycosylphosphatidylinositol-anchored lipid protein transfer 1	0	0	0
AT1G27960	0	0	0	0	0	0	0	1	0	0	0	0	0	0	0	0	0	0	NA	NA	NA	NA	NA	NA	NA	197.1	NA	NA	NA	NA	NA	NA	NA	NA	NA	NA	F13K9.7|F13K9_7|evolutionarily conserved C-terminal region 9	0	0	0
AT1G27980	0	1	1	1	1	1	1	0	0	0	1	0	0	0	0	0	0	1	NA	119.6	143.4	146.2	90.1	102.8	76.7	NA	NA	NA	139.3	NA	NA	NA	NA	NA	NA	124.1	ATDPL1|F13K9.8|F13K9_8|dihydrosphingosine phosphate lyase	0	0	0
AT1G27990	0	0	0	0	0	0	0	1	0	0	0	0	0	0	0	0	0	0	NA	NA	NA	NA	NA	NA	NA	148.9	NA	NA	NA	NA	NA	NA	NA	NA	NA	NA	F13K9.9|F13K9_9	0	0	0
AT1G28002	0	0	0	0	0	0	0	1	0	0	0	0	0	0	0	0	0	0	NA	NA	NA	NA	NA	NA	NA	94.2	NA	NA	NA	NA	NA	NA	NA	NA	NA	NA	-	0	0	0
AT1G28007	0	1	0	1	0	0	0	0	0	0	0	1	0	0	0	0	1	1	NA	128.5	NA	58.3	NA	NA	NA	NA	NA	NA	NA	71.7	NA	NA	NA	NA	317	122.7	NoInfo	0	0	0
AT1G28010	0	0	0	0	0	0	0	1	0	0	0	0	0	0	0	0	0	1	NA	NA	NA	NA	NA	NA	NA	78.4	NA	NA	NA	NA	NA	NA	NA	NA	NA	87.1	ATABCB14|ATP-binding cassette B14|Arabidopsis thaliana ATP-binding cassette B14|F13K9.11|F13K9_11|MDR12|P-glycoprotein 14|PGP14|multi-drug resistance 12	0	0	0
AT1G28020	0	0	0	0	0	0	0	1	0	0	0	0	0	0	0	0	0	0	NA	NA	NA	NA	NA	NA	NA	122.6	NA	NA	NA	NA	NA	NA	NA	NA	NA	NA	F13K9.12|F13K9_12	0	0	0
AT1G28050	0	1	1	1	1	1	1	0	0	0	1	1	0	0	0	0	0	1	NA	130.2	177.5	169	104.8	121.8	80.7	NA	NA	NA	132.2	124.4	NA	NA	NA	NA	NA	134.4	B-box domain protein 13|F13K9.15|F13K9_15	0	0	1
AT1G28060	0	1	0	0	0	0	0	0	0	0	0	0	0	0	0	0	0	0	NA	111.9	NA	NA	NA	NA	NA	NA	NA	NA	NA	NA	NA	NA	NA	NA	NA	NA	F13K9.16|F13K9_16|RDM16|RNA-directed DNA methylation 16	0	0	0
AT1G28070	0	0	0	0	0	0	0	1	0	0	0	0	0	0	0	0	0	0	NA	NA	NA	NA	NA	NA	NA	274	NA	NA	NA	NA	NA	NA	NA	NA	NA	NA	F13K9.17|F13K9_17	0	0	0
AT1G28080	0	0	0	0	0	1	1	0	0	0	0	0	1	0	0	0	0	0	NA	NA	NA	NA	NA	71.3	55.1	NA	NA	NA	NA	NA	51.3	NA	NA	NA	NA	NA	F13K9.18|F13K9_18	0	0	0
AT1G28090	0	0	0	0	0	0	0	1	0	0	0	0	1	0	0	0	0	0	NA	NA	NA	NA	NA	NA	NA	205.1	NA	NA	NA	NA	48.6	NA	NA	NA	NA	NA	F13K9.19|F13K9_19	0	0	0
AT1G28100	0	0	1	1	0	0	0	1	0	0	0	0	0	0	0	0	0	0	NA	NA	74.4	73.1	NA	NA	NA	148.9	NA	NA	NA	NA	NA	NA	NA	NA	NA	NA	F13K9.27|F13K9_27	0	0	1
AT1G28130	1	0	1	1	1	0	1	1	0	0	0	0	0	0	0	0	0	0	176	NA	264.5	264.5	134	NA	88.5	268.2	NA	NA	NA	NA	NA	NA	NA	NA	NA	NA	F3H9.21|F3H9_21	1	1	1
AT1G28140	0	0	1	1	0	1	1	0	0	0	0	0	0	0	0	0	0	1	NA	NA	189.6	171	NA	130.8	86.6	NA	NA	NA	NA	NA	NA	NA	NA	NA	NA	321.8	F3H9.20|F3H9_20	0	0	0
AT1G28170	0	0	1	1	0	0	0	0	0	0	0	0	0	0	0	0	0	0	NA	NA	136	108.7	NA	NA	NA	NA	NA	NA	NA	NA	NA	NA	NA	NA	NA	NA	F3H9.17|F3H9_17|sulphotransferase 7	0	0	0
AT1G28180	0	0	1	1	0	1	0	1	0	0	0	0	0	0	0	0	0	0	NA	NA	251.2	244.4	NA	108.7	NA	252.3	NA	NA	NA	NA	NA	NA	NA	NA	NA	NA	F3H9.16	0	0	0
AT1G28190	0	0	1	1	0	0	1	0	0	0	0	0	0	0	0	0	0	1	NA	NA	285.2	292.6	NA	NA	64.9	NA	NA	NA	NA	NA	NA	NA	NA	NA	NA	163.5	F3H9.15|F3H9_15	0	0	0
AT1G28210	0	0	0	0	0	0	0	1	0	0	0	0	0	0	0	0	0	0	NA	NA	NA	NA	NA	NA	NA	107.9	NA	NA	NA	NA	NA	NA	NA	NA	NA	NA	ATJ|AtDjB1|F3H9.13|F3H9_13	0	0	0
AT1G28230	0	1	1	1	0	0	1	0	1	0	1	1	0	0	0	0	0	1	NA	117.5	240.8	245.2	NA	NA	49.2	NA	73.5	NA	185.1	141.2	NA	NA	NA	NA	NA	284.1	ATPUP1|F3H9.22|F3H9_22|PURINE PERMEASE 1|purine permease 1	0	0	0
AT1G28240	0	0	0	0	0	0	1	1	0	0	0	0	1	0	0	0	0	0	NA	NA	NA	NA	NA	NA	49.2	150.9	NA	NA	NA	NA	56.6	NA	NA	NA	NA	NA	F3H9.11|F3H9_11	0	0	0
AT1G28250	0	1	1	1	1	0	0	0	0	0	0	0	0	0	0	0	0	1	NA	113.6	206.2	212.2	82.3	NA	NA	NA	NA	NA	NA	NA	NA	NA	NA	NA	NA	149.4	F3H9.10|F3H9_10	0	0	0
AT1G28260	0	1	1	1	0	0	1	0	0	0	1	1	0	0	0	0	0	1	NA	110.1	243.2	188.3	NA	NA	110.2	NA	NA	NA	154.8	133.7	NA	NA	NA	NA	NA	133	F3H9.9|F3H9_9	0	0	0
AT1G28270	0	0	0	0	1	1	0	1	1	0	0	0	0	0	0	0	1	1	NA	NA	NA	NA	395.7	529.5	NA	125.4	113.2	NA	NA	NA	NA	NA	NA	NA	202.5	607.3	AtRALF4|F3H9.8|F3H9_8|ralf-like 4	0	0	0
AT1G28280	0	0	0	0	0	0	0	1	0	0	0	0	0	0	0	0	0	0	NA	NA	NA	NA	NA	NA	NA	357.7	NA	NA	NA	NA	NA	NA	NA	NA	NA	NA	F3H9.7|F3H9_7|MPK3/6-targeted VQP 1|MVQ1	0	0	0
AT1G28281	0	1	1	1	0	0	1	1	0	0	0	0	0	0	0	0	0	0	NA	226.9	219.1	224.2	NA	NA	90.5	320.9	NA	NA	NA	NA	NA	NA	NA	NA	NA	NA	NoInfo	0	0	0
AT1G28300	0	1	0	0	0	0	0	0	0	0	0	0	0	0	0	0	0	0	NA	79	NA	NA	NA	NA	NA	NA	NA	NA	NA	NA	NA	NA	NA	NA	NA	NA	AtLEC2|F3H9.5|F3H9_5|LEAFY COTYLEDON 2	1	0	0
AT1G28304	0	0	0	0	0	0	0	1	0	0	0	0	0	0	0	0	0	0	NA	NA	NA	NA	NA	NA	NA	131.1	NA	NA	NA	NA	NA	NA	NA	NA	NA	NA	NoInfo	0	0	0
AT1G28305	0	0	0	0	0	0	0	1	0	0	0	0	0	0	0	0	0	0	NA	NA	NA	NA	NA	NA	NA	271.2	NA	NA	NA	NA	NA	NA	NA	NA	NA	NA	-	0	0	0
AT1G28307	0	0	0	0	0	0	0	1	0	0	0	0	0	0	0	0	0	0	NA	NA	NA	NA	NA	NA	NA	196.3	NA	NA	NA	NA	NA	NA	NA	NA	NA	NA	NoInfo	0	0	0
AT1G28310	0	1	1	1	1	1	0	0	0	0	0	0	0	0	0	0	0	1	NA	85	76.2	82.1	118.8	140.6	NA	NA	NA	NA	NA	NA	NA	NA	NA	NA	NA	151.8	F3H9.4|F3H9_4	0	0	0
AT1G28320	0	0	0	0	0	0	0	1	0	0	0	0	0	0	0	0	0	0	NA	NA	NA	NA	NA	NA	NA	130.6	NA	NA	NA	NA	NA	NA	NA	NA	NA	NA	AtDEG15|F3H9.3|F3H9_3|degradation of periplasmic proteins 15	0	0	0
AT1G28330	0	0	0	0	0	0	1	0	0	0	0	0	0	0	0	0	0	0	NA	NA	NA	NA	NA	NA	186.9	NA	NA	NA	NA	NA	NA	NA	NA	NA	NA	NA	AtDRM1|DORMANCY-ASSOCIATED PROTEIN 1|DRM1|F3H9.1|F3H9_1|dormancy-associated protein-like 1	0	0	1
AT1G28335	1	0	0	0	1	1	1	1	1	0	1	1	0	0	0	0	1	1	221.7	NA	NA	NA	160.2	181	242	348.4	104.8	NA	183.2	183.2	NA	NA	NA	NA	327.6	193.6	low-molecular-weight cysteine-rich 31	0	0	0
AT1G28340	0	0	1	1	1	1	0	1	0	0	0	0	0	0	0	0	0	1	NA	NA	427.6	445	264.2	367.3	NA	189.6	NA	NA	NA	NA	NA	NA	NA	NA	NA	426	AtRLP4|F3M18.23|F3M18_23|receptor like protein 4	0	0	0
AT1G28360	0	1	1	1	1	1	1	1	1	0	1	1	1	0	0	0	0	1	NA	323.6	577.9	611.6	342.2	435.2	110.2	171.3	140.5	NA	218.1	215.2	79.4	NA	NA	NA	NA	450.7	ATERF12|ERF DOMAIN PROTEIN 12|ERF domain protein 12|F3M18.21|F3M18_21	0	0	0
AT1G28375	0	0	1	1	1	1	1	1	0	0	1	0	1	0	0	0	0	1	NA	NA	379.6	352	127.9	184.5	59	351.7	NA	NA	144.4	NA	63.4	NA	NA	NA	NA	192.3	-	0	0	0
AT1G28380	0	0	1	0	0	0	0	0	0	0	0	0	0	0	0	0	0	0	NA	NA	329.2	NA	NA	NA	NA	NA	NA	NA	NA	NA	NA	NA	NA	NA	NA	NA	F3M18.18|F3M18_18|necrotic spotted lesions 1	0	0	1
AT1G28390	0	0	1	1	1	1	0	1	0	0	0	0	0	0	0	0	0	1	NA	NA	471.5	451.9	174	208.7	NA	201.1	NA	NA	NA	NA	NA	NA	NA	NA	NA	386.6	F3M18.17|F3M18_17	0	0	1
AT1G28395	0	0	1	1	0	1	0	1	0	0	0	0	0	0	0	0	0	1	NA	NA	124.7	130	NA	145.6	NA	152.6	NA	NA	NA	NA	NA	NA	NA	NA	NA	171.4	-	0	0	1
AT1G28400	0	0	0	0	0	0	0	1	0	0	0	0	0	0	0	0	0	0	NA	NA	NA	NA	NA	NA	NA	1051.5	NA	NA	NA	NA	NA	NA	NA	NA	NA	NA	F3M18.16|F3M18_16	0	0	1
AT1G28410	0	1	1	1	1	0	0	1	0	0	0	0	0	0	0	0	0	1	NA	105.5	110.8	77.3	81.9	NA	NA	520	NA	NA	NA	NA	NA	NA	NA	NA	NA	94.3	F3M18.15|F3M18_15	0	0	0
AT1G28440	0	0	1	0	0	0	0	1	0	0	0	0	0	0	0	0	0	0	NA	NA	106.9	NA	NA	NA	NA	192.6	NA	NA	NA	NA	NA	NA	NA	NA	NA	NA	F3M18.12|F3M18_12|HAESA-like 1	0	0	0
AT1G28447	1	1	1	1	1	1	1	1	1	0	1	1	0	1	1	0	1	1	313.2	154.6	148.8	178.5	156.4	144.8	389.5	81.4	121.3	NA	329.2	307.6	NA	125.6	132.5	NA	143	361.2	-	0	0	0
AT1G28465	0	0	0	0	0	0	0	1	0	0	0	0	0	0	0	0	0	0	NA	NA	NA	NA	NA	NA	NA	56.2	NA	NA	NA	NA	NA	NA	NA	NA	NA	NA	F3M18.30	0	0	0
AT1G28470	0	0	0	0	0	0	0	1	0	0	0	0	0	0	0	0	0	0	NA	NA	NA	NA	NA	NA	NA	88.7	NA	NA	NA	NA	NA	NA	NA	NA	NA	NA	ANAC010|F3M18.9|F3M18_9|NAC domain containing protein 10|SECONDARY WALL-ASSOCIATED NAC DOMAIN PROTEIN 3|SND3	0	0	0
AT1G28480	0	1	1	1	1	1	1	0	0	0	0	0	0	0	0	0	0	1	NA	125.3	284.4	310.1	171.3	95.7	66.9	NA	NA	NA	NA	NA	NA	NA	NA	NA	NA	139.2	ROXY19|roxy19	0	0	1
AT1G28490	0	0	1	1	1	0	0	0	0	0	0	0	1	0	0	0	1	1	NA	NA	298.8	254.2	111.2	NA	NA	NA	NA	NA	NA	NA	58.5	NA	NA	NA	165.3	109.3	ATSYP61|F3M18.7|F3M18_7|OSM1|syntaxin of plants 61	0	0	0
AT1G28500	0	0	0	0	0	0	0	1	0	0	0	0	0	0	0	0	0	0	NA	NA	NA	NA	NA	NA	NA	168.3	NA	NA	NA	NA	NA	NA	NA	NA	NA	NA	F3M18.6|F3M18_6	0	0	0
AT1G28530	0	1	0	0	0	0	0	1	0	0	0	0	0	0	0	0	0	0	NA	79.4	NA	NA	NA	NA	NA	159.3	NA	NA	NA	NA	NA	NA	NA	NA	NA	NA	ANGULATA 10|ANU10|F3M18.3	0	0	0
AT1G28540	0	0	1	1	0	0	0	0	0	0	1	0	0	0	0	0	0	1	NA	NA	72.1	61.5	NA	NA	NA	NA	NA	NA	76.6	NA	NA	NA	NA	NA	NA	57.6	F3M18.29	0	0	0
AT1G28560	0	0	0	0	0	0	0	1	0	0	0	0	0	0	0	0	0	0	NA	NA	NA	NA	NA	NA	NA	98.2	NA	NA	NA	NA	NA	NA	NA	NA	NA	NA	F3M18.1|SHOOT REDIFFERENTIATION DEFECTIVE 2	1	0	0
AT1G28570	0	1	0	0	1	1	1	0	0	0	0	0	0	0	0	0	0	1	NA	179.3	NA	NA	231.7	292.5	76.7	NA	NA	NA	NA	NA	NA	NA	NA	NA	NA	257.1	F1K23.19|F1K23_19	0	0	1
AT1G28580	1	1	1	1	1	1	1	1	0	0	1	1	0	0	0	0	0	1	130.2	274.9	524.3	552	290.7	230.7	82.6	183.8	NA	NA	318.3	237.8	NA	NA	NA	NA	NA	348.9	F1K23.18|F1K23_18	0	0	1
AT1G28591	1	0	0	0	0	0	1	0	0	0	0	0	0	0	0	0	0	0	122.5	NA	NA	NA	NA	NA	63	NA	NA	NA	NA	NA	NA	NA	NA	NA	NA	NA	-	0	0	0
AT1G28600	0	0	1	1	0	0	0	1	0	0	0	0	0	0	0	0	1	0	NA	NA	137.5	155.3	NA	NA	NA	113.4	NA	NA	NA	NA	NA	NA	NA	NA	137.7	NA	F1K23.28|F1K23_28	0	0	1
AT1G28610	0	0	0	0	0	0	0	0	0	0	0	0	0	0	0	0	0	1	NA	NA	NA	NA	NA	NA	NA	NA	NA	NA	NA	NA	NA	NA	NA	NA	NA	152.9	F1K23.16|F1K23_16	0	0	0
AT1G28630	0	1	0	0	1	1	1	1	0	0	1	0	0	0	0	0	0	1	NA	114.7	NA	NA	107.7	97.2	55.1	242.8	NA	NA	69	NA	NA	NA	NA	NA	NA	85.7	F1K23.14|F1K23_14	0	0	0
AT1G28660	0	0	1	1	0	0	0	0	0	0	0	0	1	0	0	0	0	0	NA	NA	253.2	232.3	NA	NA	NA	NA	NA	NA	NA	NA	60.8	NA	NA	NA	NA	NA	-	0	0	0
AT1G28680	0	1	1	1	1	1	1	1	0	0	1	1	0	0	0	0	1	1	NA	265.7	250.3	271.6	194.1	288.6	151.5	74.2	NA	NA	208.6	207.4	NA	NA	NA	NA	325.7	252.6	F1K23.12|F1K23_12	0	0	1
AT1G28685	0	0	0	0	0	0	0	1	0	0	0	0	0	0	0	0	0	0	NA	NA	NA	NA	NA	NA	NA	99.7	NA	NA	NA	NA	NA	NA	NA	NA	NA	NA	-	0	0	0
AT1G28720	0	0	0	0	0	0	0	1	0	0	0	0	0	0	0	0	0	0	NA	NA	NA	NA	NA	NA	NA	88.9	NA	NA	NA	NA	NA	NA	NA	NA	NA	NA	51358.TRNA-PRO-26	0	0	0
AT1G28750	0	0	0	1	0	0	0	0	0	0	0	0	0	0	0	0	0	0	NA	NA	NA	66.9	NA	NA	NA	NA	NA	NA	NA	NA	NA	NA	NA	NA	NA	NA	51358.TRNA-PRO-23	0	0	0
AT1G28760	0	1	1	1	0	0	1	0	0	0	1	1	0	0	0	0	0	0	NA	125.6	73.5	75.2	NA	NA	90.5	NA	NA	NA	113	123.7	NA	NA	NA	NA	NA	NA	F1K23.6|F1K23_6	0	0	0
AT1G28815	0	0	1	1	0	0	1	1	0	0	0	0	0	0	0	0	0	0	NA	NA	143.4	112.3	NA	NA	45.2	86.9	NA	NA	NA	NA	NA	NA	NA	NA	NA	NA	-	0	0	0
AT1G28980	0	0	0	0	0	0	0	1	0	0	0	0	0	0	0	0	0	0	NA	NA	NA	NA	NA	NA	NA	171.1	NA	NA	NA	NA	NA	NA	NA	NA	NA	NA	51358.TRNA-PRO-2	0	0	0
AT1G29000	0	0	0	0	0	0	0	1	0	0	0	0	0	0	0	0	0	0	NA	NA	NA	NA	NA	NA	NA	122.9	NA	NA	NA	NA	NA	NA	NA	NA	NA	NA	F1K23.4|F1K23_4	0	0	0
AT1G29010	0	0	0	0	0	0	0	1	0	0	0	0	0	0	0	0	0	0	NA	NA	NA	NA	NA	NA	NA	194.3	NA	NA	NA	NA	NA	NA	NA	NA	NA	NA	F28N24.31|TCP Interactor containing EAR motif protein 3|TIE3	0	0	0
AT1G29020	0	1	1	1	1	1	0	1	0	0	0	0	1	0	0	0	0	1	NA	75.9	304	243.9	172.8	90.5	NA	344.9	NA	NA	NA	NA	46	NA	NA	NA	NA	85	F28N24.34	0	0	0
AT1G29025	1	0	0	0	0	0	1	1	0	0	0	0	0	0	0	0	0	0	121.7	NA	NA	NA	NA	NA	53.1	265.2	NA	NA	NA	NA	NA	NA	NA	NA	NA	NA	-	0	0	0
AT1G29040	0	0	0	0	0	0	0	1	0	0	0	0	0	0	0	0	0	0	NA	NA	NA	NA	NA	NA	NA	196.6	NA	NA	NA	NA	NA	NA	NA	NA	NA	NA	F28N24.25|F28N24_25	0	0	0
AT1G29050	0	0	0	0	0	1	0	1	0	0	0	0	0	0	0	0	0	0	NA	NA	NA	NA	NA	90.7	NA	381.4	NA	NA	NA	NA	NA	NA	NA	NA	NA	NA	F28N24.24|F28N24_24|TRICHOME BIREFRINGENCE-LIKE 38	0	0	1
AT1G29060	0	0	1	1	1	1	1	1	0	0	0	0	0	0	0	0	0	1	NA	NA	445.6	375.4	131.3	119.7	78.7	265.5	NA	NA	NA	NA	NA	NA	NA	NA	NA	290	F28N24.23|F28N24_23	0	0	0
AT1G29070	0	0	0	0	0	0	1	0	0	0	0	0	0	0	0	0	0	0	NA	NA	NA	NA	NA	NA	68.9	NA	NA	NA	NA	NA	NA	NA	NA	NA	NA	NA	F28N24.22|F28N24_22	0	0	0
AT1G29071	0	0	0	0	0	0	0	1	0	0	0	0	0	0	0	0	0	0	NA	NA	NA	NA	NA	NA	NA	195.8	NA	NA	NA	NA	NA	NA	NA	NA	NA	NA	small nucleolar RNA105	0	0	0
AT1G29080	0	0	0	0	0	0	0	1	1	0	0	0	0	0	0	0	0	0	NA	NA	NA	NA	NA	NA	NA	105.9	47.8	NA	NA	NA	NA	NA	NA	NA	NA	NA	F28N24.27|F28N24_27	0	0	0
AT1G29090	0	0	1	0	1	0	1	1	0	0	0	0	0	0	1	0	0	0	NA	NA	94.2	NA	85	NA	51.2	295.2	NA	NA	NA	NA	NA	NA	95.8	NA	NA	NA	F28N24.20|F28N24_20	0	0	0
AT1G29110	0	0	0	0	0	0	0	1	0	0	0	0	0	0	0	0	0	0	NA	NA	NA	NA	NA	NA	NA	298.7	NA	NA	NA	NA	NA	NA	NA	NA	NA	NA	F28N24.18|F28N24_18	0	0	0
AT1G29120	0	1	1	1	1	1	1	0	1	0	1	1	0	0	0	0	0	1	NA	138	190.5	174.4	188.3	256	61	NA	81.9	NA	89.7	93	NA	NA	NA	NA	NA	85.7	AT1G29130|F28N24.29|F28N24_29|UP9	0	0	0
AT1G29140	0	0	0	0	0	0	0	1	0	0	0	0	0	0	0	0	0	0	NA	NA	NA	NA	NA	NA	NA	285.5	NA	NA	NA	NA	NA	NA	NA	NA	NA	NA	F28N24.16|F28N24_16	0	0	0
AT1G29150	0	1	1	1	0	0	0	0	0	0	1	1	0	0	0	0	0	0	NA	175	112.6	108.7	NA	NA	NA	NA	NA	NA	114.2	114.1	NA	NA	NA	NA	NA	NA	REGULATORY PARTICLE NON-ATPASE 6|RPN6|non-ATPase subunit 9	0	0	0
AT1G29160	0	0	1	1	0	0	0	0	0	0	0	0	0	0	0	0	0	0	NA	NA	143	117.3	NA	NA	NA	NA	NA	NA	NA	NA	NA	NA	NA	NA	NA	NA	F28N24.35	0	0	0
AT1G29170	0	1	1	1	0	0	0	1	0	0	1	1	0	0	0	0	0	1	NA	135.5	117.4	139.4	NA	NA	NA	166.1	NA	NA	152.2	110.2	NA	NA	NA	NA	NA	170.7	ATSCAR3|F28N24.14|F28N24_14|SCAR3|WASP (WISKOTT-ALDRICH SYNDROME PROTEIN)-FAMILY VERPROLIN HOMOLOGOUS PROTEIN 2	0	0	0
AT1G29179	0	0	1	1	1	0	0	0	0	0	0	0	0	0	0	0	0	0	NA	NA	168.1	211.2	87.9	NA	NA	NA	NA	NA	NA	NA	NA	NA	NA	NA	NA	NA	-	0	0	0
AT1G29180	0	0	0	0	0	0	0	1	0	0	0	0	0	0	0	0	0	0	NA	NA	NA	NA	NA	NA	NA	107.1	NA	NA	NA	NA	NA	NA	NA	NA	NA	NA	F28N24.13|F28N24_13	0	0	0
AT1G29195	0	0	0	0	0	0	0	1	0	0	0	0	0	0	0	0	0	0	NA	NA	NA	NA	NA	NA	NA	114.9	NA	NA	NA	NA	NA	NA	NA	NA	NA	NA	-	0	0	1
AT1G29200	0	0	0	0	0	0	0	1	0	0	0	0	0	0	0	0	0	0	NA	NA	NA	NA	NA	NA	NA	136.9	NA	NA	NA	NA	NA	NA	NA	NA	NA	NA	F28N24.11|F28N24_11	0	0	0
AT1G29230	0	1	1	1	1	1	0	0	0	0	0	0	0	0	0	0	0	1	NA	118.2	343.5	339.5	238.4	178.7	NA	NA	NA	NA	NA	NA	NA	NA	NA	NA	NA	217.6	ATCIPK18|ATWL1|CBL-interacting protein kinase 18|F28N24.9|F28N24_9|SNF1-RELATED PROTEIN KINASE 3.20|SnRK3.20|WL1|WPL4-LIKE 1	0	0	0
AT1G29240	0	0	0	0	0	0	0	1	0	0	0	0	0	0	0	0	0	0	NA	NA	NA	NA	NA	NA	NA	111.1	NA	NA	NA	NA	NA	NA	NA	NA	NA	NA	F28N24.8|F28N24_8	0	0	0
AT1G29250	0	0	1	1	0	0	0	1	0	0	0	0	0	0	0	0	0	0	NA	NA	160.2	142.8	NA	NA	NA	304.2	NA	NA	NA	NA	NA	NA	NA	NA	NA	NA	F28N24.7|F28N24_7	0	0	0
AT1G29270	0	0	0	0	0	1	0	1	0	0	0	1	0	0	0	0	0	0	NA	NA	NA	NA	NA	158.6	NA	418.9	NA	NA	NA	132.1	NA	NA	NA	NA	NA	NA	F28N24.5|F28N24_5	0	0	0
AT1G29280	0	0	1	0	0	0	0	0	0	0	0	0	0	0	0	0	0	0	NA	NA	261.7	NA	NA	NA	NA	NA	NA	NA	NA	NA	NA	NA	NA	NA	NA	NA	ATWRKY65|F28N24.4|F28N24_4|WRKY DNA-BINDING PROTEIN 65|WRKY DNA-binding protein 65	0	0	0
AT1G29290	1	0	0	0	0	0	1	0	0	0	0	0	1	1	0	1	0	0	253.5	NA	NA	NA	NA	NA	220.3	NA	NA	NA	NA	NA	80.1	358	NA	169.4	NA	NA	F28N24.30|F28N24_30	0	0	0
AT1G29300	0	1	1	1	1	1	1	1	1	0	1	1	0	0	0	0	1	1	NA	207.2	413.9	382.7	221.9	219	196.7	292.2	176.3	NA	275.6	276.7	NA	NA	NA	NA	194.3	229.6	F28N24.3|F28N24_3|unfertilized embryo sac 1	0	0	0
AT1G29330	0	1	1	1	0	1	1	1	0	0	1	1	0	0	0	0	0	1	NA	173.3	319.4	329	NA	106.6	141.6	175.6	NA	NA	196.4	176.6	NA	NA	NA	NA	NA	203.2	AERD2|ARABIDOPSIS ENDOPLASMIC RETICULUM RETENTION DEFECTIVE 2|ARABIDOPSIS THALIANA ENDOPLASMIC RETICULUM RETENTION DEFECTIVE 2|ATERD2|ENDOPLASMIC RETICULUM RETENTION DEFECTIVE 2|F28N24.1	0	0	0
AT1G29340	1	0	1	1	0	0	1	1	0	0	1	0	0	0	0	0	0	1	119.4	NA	201.2	187.9	NA	NA	70.8	326.2	NA	NA	119.8	NA	NA	NA	NA	NA	NA	167.3	ARABIDOPSIS THALIANA PLANT U-BOX 17|ATPUB17|F15D2.34|F15D2_34|plant U-box 17	0	0	0
AT1G29355	0	0	0	0	0	0	0	1	0	0	0	0	0	0	0	0	0	0	NA	NA	NA	NA	NA	NA	NA	48.2	NA	NA	NA	NA	NA	NA	NA	NA	NA	NA	-	0	0	0
AT1G29360	0	1	1	1	0	0	1	0	0	0	0	0	0	0	0	0	0	0	NA	92.8	55.2	61.1	NA	NA	47.2	NA	NA	NA	NA	NA	NA	NA	NA	NA	NA	NA	F15D2.40	0	0	0
AT1G29390	0	1	1	1	1	0	0	1	0	0	1	0	1	0	0	0	0	1	NA	148.2	134.1	121.8	106.1	NA	NA	133.4	NA	NA	119.5	NA	73.7	NA	NA	NA	NA	124.8	COLD REGULATED 314 INNER MEMBRANE 2|COR413IM2|F15D2.42|cold regulated 314 thylakoid membrane 2	0	0	0
AT1G29395	0	0	1	1	0	0	1	1	0	0	1	0	0	0	0	0	0	1	NA	NA	141.8	151.4	NA	NA	110.2	97.4	NA	NA	149.9	NA	NA	NA	NA	NA	NA	157.7	COLD REGULATED 314 INNER MEMBRANE 1|COLD REGULATED 314 THYLAKOID MEMBRANE 1|COR413-TM1|COR414-TM1|cold regulated 414 thylakoid membrane 1	0	0	0
AT1G29400	0	0	1	1	0	0	0	0	0	0	1	0	0	0	0	0	0	1	NA	NA	226	235.4	NA	NA	NA	NA	NA	NA	156.1	NA	NA	NA	NA	NA	NA	207.7	AML5|F15D2.30|F15D2_30|MEI2-like protein 5	0	0	0
AT1G29410	0	0	1	1	1	0	0	0	0	0	0	0	0	0	0	0	0	0	NA	NA	279.8	234	140.4	NA	NA	NA	NA	NA	NA	NA	NA	NA	NA	NA	NA	NA	F15D2.31|F15D2_31|PHOSPHORIBOSYLANTHRANILATE ISOMERASE|phosphoribosylanthranilate isomerase 3	0	0	0
AT1G29420	0	0	0	0	0	0	0	1	0	0	0	0	0	0	0	0	0	0	NA	NA	NA	NA	NA	NA	NA	181.3	NA	NA	NA	NA	NA	NA	NA	NA	NA	NA	F15D2.32|F15D2_32|SAUR61|SMALL AUXIN UPREGULATED RNA 61	1	0	0
AT1G29430	1	0	0	0	0	0	1	1	0	0	0	0	0	0	1	0	0	1	569	NA	NA	NA	NA	NA	179	105.2	NA	NA	NA	NA	NA	NA	277.3	NA	NA	129.9	F15D2.2|F15D2_2|SAUR62|SMALL AUXIN UPREGULATED RNA 62	1	0	1
AT1G29440	1	1	1	1	0	0	1	0	1	1	1	1	1	1	1	1	0	1	569	130.6	64.6	75.7	NA	NA	177.1	NA	180.7	447.3	420	365	157.6	552.9	407.9	521	NA	218.3	F15D2.3|F15D2_3|SMALL AUXIN UP RNA 63	1	1	1
AT1G29460	1	0	0	0	0	0	0	1	0	0	0	0	0	0	0	0	0	0	400.8	NA	NA	NA	NA	NA	NA	99.2	NA	NA	NA	NA	NA	NA	NA	NA	NA	NA	F15D2.35|F15D2_35|SAUR65|SMALL AUXIN UPREGULATED RNA 65	1	1	1
AT1G29470	0	1	1	1	0	0	1	0	0	0	1	0	1	0	0	0	0	0	NA	84.7	67.6	55	NA	NA	64.9	NA	NA	NA	79.5	NA	59.6	NA	NA	NA	NA	NA	F15D2.5|F15D2_5	0	0	0
AT1G29490	0	0	0	0	0	0	0	1	0	0	0	0	0	0	0	0	0	0	NA	NA	NA	NA	NA	NA	NA	166.1	NA	NA	NA	NA	NA	NA	NA	NA	NA	NA	F15D2.7|F15D2_7|SAUR68|SMALL AUXIN UPREGULATED 68	1	1	1
AT1G29500	1	0	1	1	1	0	1	1	0	1	1	1	1	1	1	1	0	1	776	NA	51.6	69.4	91	NA	316.7	184.3	NA	232.4	234	233.4	124.6	380.4	382.1	366.3	NA	97.3	F15D2.8|F15D2_8|SAUR66|SMALL AUXIN UPREGULATED RNA 66	1	1	1
AT1G29510	1	0	0	0	0	0	1	0	0	0	1	1	0	1	1	1	0	1	529.5	NA	NA	NA	NA	NA	125.9	NA	NA	NA	163.2	155.1	NA	236.2	262.4	215.4	NA	76.8	F15D2.9|F15D2_9|SAUR67|SMALL AUXIN UPREGULATED 68|SMALL AUXIN UPREGULATED RNA 67	1	1	1
AT1G29530	0	0	1	0	0	0	0	0	0	0	0	0	0	0	0	0	0	0	NA	NA	73.5	NA	NA	NA	NA	NA	NA	NA	NA	NA	NA	NA	NA	NA	NA	NA	F15D2.11|F15D2_11	0	0	0
AT1G29540	0	0	0	0	0	0	0	1	0	0	0	0	0	0	0	0	0	0	NA	NA	NA	NA	NA	NA	NA	67.9	NA	NA	NA	NA	NA	NA	NA	NA	NA	NA	F15D2.12|F15D2_12	0	0	0
AT1G29550	0	0	1	0	0	0	0	0	0	0	0	0	0	0	0	0	0	0	NA	NA	70.9	NA	NA	NA	NA	NA	NA	NA	NA	NA	NA	NA	NA	NA	NA	NA	EIF4E1B|F15D2.13|F15D2_13	0	0	0
AT1G29590	0	0	0	1	0	0	0	0	0	0	0	0	0	0	0	0	0	0	NA	NA	NA	63.6	NA	NA	NA	NA	NA	NA	NA	NA	NA	NA	NA	NA	NA	NA	EIF4E1C|F15D2.16|F15D2_16|eukaryotic translation Initiation Factor 4E3	0	0	0
AT1G29600	0	1	1	1	0	0	0	1	0	0	1	1	0	0	0	0	1	1	NA	81.5	66.5	68.4	NA	NA	NA	47.5	NA	NA	84.8	86	NA	NA	NA	NA	89.9	62	F15D2.17|F15D2_17	0	0	0
AT1G29640	1	1	1	1	1	1	1	1	1	1	1	1	0	1	1	0	1	1	338.8	361.7	353.6	353.4	219	245.5	184.9	108.6	130.1	161.1	375.5	289.2	NA	115.6	120	NA	258.1	517.5	F15D2.20|F15D2_20	0	0	0
AT1G29650	0	0	0	0	0	0	0	0	0	0	0	0	0	0	0	0	1	0	NA	NA	NA	NA	NA	NA	NA	NA	NA	NA	NA	NA	NA	NA	NA	NA	287.5	NA	F15D2.38|F15D2_38	0	0	0
AT1G29660	0	0	0	0	0	0	0	0	0	0	1	1	0	0	0	0	0	0	NA	NA	NA	NA	NA	NA	NA	NA	NA	NA	213	200.9	NA	NA	NA	NA	NA	NA	F15D2.21|F15D2_21	0	0	0
AT1G29670	0	0	1	1	0	0	0	1	0	0	0	0	0	0	0	0	0	1	NA	NA	158.8	165.6	NA	NA	NA	171.8	NA	NA	NA	NA	NA	NA	NA	NA	NA	172.7	F15D2.22|F15D2_22	0	0	0
AT1G29690	0	1	1	1	1	1	0	0	0	0	1	1	0	0	0	0	0	1	NA	156.3	292.4	283.7	128.8	141.7	NA	NA	NA	NA	106.3	105.4	NA	NA	NA	NA	NA	211.1	F15D2.24|F15D2_24|NSL2|constitutively activated cell death 1|necrotic spotted lesion 2	0	0	0
AT1G29710	0	1	0	0	0	0	0	0	0	0	0	0	0	0	0	0	0	0	NA	62.1	NA	NA	NA	NA	NA	NA	NA	NA	NA	NA	NA	NA	NA	NA	NA	NA	T3M22.4|T3M22_4	0	0	0
AT1G29715	0	0	0	0	0	0	0	0	0	0	0	0	0	0	0	0	0	1	NA	NA	NA	NA	NA	NA	NA	NA	NA	NA	NA	NA	NA	NA	NA	NA	NA	115.2	T3M22.7	0	0	0
AT1G29720	0	1	0	0	0	0	0	1	0	0	0	0	0	0	0	0	0	1	NA	45.9	NA	NA	NA	NA	NA	313	NA	NA	NA	NA	NA	NA	NA	NA	NA	56.6	CELLULOSE SYNTHASE LIKE D2|CLSD2|T3M22.6|T3M22_6	0	0	0
AT1G29730	0	0	0	0	0	0	0	1	0	0	0	0	0	0	0	0	0	0	NA	NA	NA	NA	NA	NA	NA	230	NA	NA	NA	NA	NA	NA	NA	NA	NA	NA	T3M22.3	0	0	0
AT1G29740	0	0	1	1	0	0	0	0	0	0	0	0	0	0	0	0	0	0	NA	NA	56	60.6	NA	NA	NA	NA	NA	NA	NA	NA	NA	NA	NA	NA	NA	NA	F1N18.20|F1N18_20	0	0	0
AT1G29750	0	0	0	0	0	0	0	1	0	0	0	0	0	0	0	0	0	0	NA	NA	NA	NA	NA	NA	NA	89.9	NA	NA	NA	NA	NA	NA	NA	NA	NA	NA	F1N18.19|F1N18_19|RECEPTOR-LIKE SERINE/THREONINE KINASE|receptor-like kinase in flowers 1	0	0	0
AT1G29760	0	1	1	0	0	0	0	0	0	0	0	0	0	0	0	0	0	0	NA	83.6	67.1	NA	NA	NA	NA	NA	NA	NA	NA	NA	NA	NA	NA	NA	NA	NA	CELLULOSE SYNTHASE LIKE D4|CLSD4|F1N18.18|F1N18_18	0	0	0
AT1G29800	0	0	0	0	0	0	0	1	0	0	0	0	0	0	0	0	0	0	NA	NA	NA	NA	NA	NA	NA	171.1	NA	NA	NA	NA	NA	NA	NA	NA	NA	NA	F1N18.15|F1N18_15	0	0	0
AT1G29810	0	1	1	1	0	0	0	0	0	0	0	0	0	0	0	0	0	0	NA	81.2	57.2	58.3	NA	NA	NA	NA	NA	NA	NA	NA	NA	NA	NA	NA	NA	NA	CELLULOSE SYNTHASE LIKE B5|F1N18.100|F1N18_100	0	0	0
AT1G29840	0	1	0	0	0	0	0	1	0	0	0	0	0	0	0	0	0	0	NA	109.4	NA	NA	NA	NA	NA	315.7	NA	NA	NA	NA	NA	NA	NA	NA	NA	NA	F1N18.12|F1N18_12	0	0	0
AT1G29850	0	0	1	1	1	1	0	0	0	0	1	1	0	0	0	0	0	1	NA	NA	286.7	273.5	80.5	74.2	NA	NA	NA	NA	78.4	84.5	NA	NA	NA	NA	NA	143.6	F1N18.11|F1N18_11	0	0	0
AT1G29880	0	1	1	1	1	0	1	0	0	0	1	1	0	0	0	0	1	1	NA	125.6	108.3	92	81.4	NA	57.1	NA	NA	NA	116.2	100.5	NA	NA	NA	NA	141.6	163.1	CELLULOSE SYNTHASE LIKE C12|CLSC12|F1N18.8|F1N18_8	0	0	0
AT1G29900	0	0	1	1	0	1	0	1	0	0	0	0	0	0	0	0	0	1	NA	NA	89.2	82.4	NA	97.4	NA	109.4	NA	NA	NA	NA	NA	NA	NA	NA	NA	128.9	CARBAMOYL PHOSPHATE SYNTHETASE LARGE SUBUNIT|CELLULOSE SYNTHASE LIKE B6|CLSB6|F1N18.6|F1N18_6|VEN3|VENOSA 3|carbamoyl phosphate synthetase B	0	0	0
AT1G29940	0	0	0	0	0	0	0	1	0	0	0	0	0	0	0	0	0	0	NA	NA	NA	NA	NA	NA	NA	245.3	NA	NA	NA	NA	NA	NA	NA	NA	NA	NA	F1N18.2|nuclear RNA polymerase A2	0	0	1
AT1G29950	0	1	1	1	1	1	1	0	1	0	1	1	0	0	0	0	1	1	NA	114.3	146.4	152.7	173.7	255.8	70.8	NA	99.2	NA	163	159.5	NA	NA	NA	NA	108.7	245.1	T1P2.2	0	0	1
AT1G29951	0	0	0	0	0	0	0	1	0	0	0	0	0	0	0	0	0	0	NA	NA	NA	NA	NA	NA	NA	126.4	NA	NA	NA	NA	NA	NA	NA	NA	NA	NA	NoInfo	0	0	0
AT1G29980	0	1	1	1	1	1	1	1	0	0	0	0	0	0	0	0	1	1	NA	146.8	347.3	321.9	146.3	123.7	72.8	114.6	NA	NA	NA	NA	NA	NA	NA	NA	373.1	363.6	T1P2.9|T1P2_9	0	0	0
AT1G30000	0	0	1	0	0	0	0	0	0	0	0	0	0	0	0	0	0	0	NA	NA	83.7	NA	NA	NA	NA	NA	NA	NA	NA	NA	NA	NA	NA	NA	NA	NA	T1P2.10|T1P2_10|alpha-mannosidase 3	0	0	0
AT1G30010	0	0	0	0	0	0	0	1	0	0	0	0	0	0	0	0	0	0	NA	NA	NA	NA	NA	NA	NA	147.1	NA	NA	NA	NA	NA	NA	NA	NA	NA	NA	T1P2.4|T1P2_4|nuclear maturase 1	0	0	0
AT1G30016	0	1	1	1	0	1	1	1	1	0	1	1	0	0	0	0	1	1	NA	206.1	145.4	198.4	NA	90.5	76.7	199.8	78.7	NA	133.9	126.3	NA	NA	NA	NA	158	264.6	NoInfo	0	0	0
AT1G30020	0	0	0	0	1	1	1	1	0	0	0	0	1	0	0	0	0	0	NA	NA	NA	NA	120.3	123.1	59	312.5	NA	NA	NA	NA	55.4	NA	NA	NA	NA	NA	T1P2.11|T1P2_11	0	0	0
AT1G30030	1	0	1	1	0	0	1	1	0	0	0	0	0	0	0	0	1	0	90.7	NA	80.2	61.7	NA	NA	51.2	78.7	NA	NA	NA	NA	NA	NA	NA	NA	45.4	NA	T1P2.5	0	0	0
AT1G30040	0	1	1	1	0	1	0	0	0	0	0	1	0	0	0	0	0	1	NA	108.3	100.5	129.6	NA	99.5	NA	NA	NA	NA	NA	146.6	NA	NA	NA	NA	NA	233.4	ATGA2OX2|GIBBERELLIN 2-OXIDASE 2|T1P2.6|T1P2_6|gibberellin 2-oxidase	0	0	0
AT1G30050	1	0	1	1	0	0	1	1	0	0	1	1	0	0	0	0	0	1	135.7	NA	101.1	98.8	NA	NA	70.8	85.2	NA	NA	206.8	183.7	NA	NA	NA	NA	NA	171	T1P2.7|T1P2_7	0	0	0
AT1G30070	0	0	1	1	1	0	0	1	0	0	0	0	0	0	0	0	0	0	NA	NA	161	153.3	79.3	NA	NA	158.8	NA	NA	NA	NA	NA	NA	NA	NA	NA	NA	T1P2.12|T1P2_12	0	0	1
AT1G30080	0	0	1	1	1	1	1	1	0	0	0	0	0	0	0	0	0	1	NA	NA	123.7	106.7	72.7	71.5	47.2	226.5	NA	NA	NA	NA	NA	NA	NA	NA	NA	125.1	T1P2.13|T1P2_13	0	0	0
AT1G30090	1	0	1	1	0	1	0	0	0	0	0	0	1	0	0	0	0	0	209.3	NA	76.5	55.4	NA	67.7	NA	NA	NA	NA	NA	NA	50.1	NA	NA	NA	NA	NA	T2H7.11|T2H7_11	0	0	0
AT1G30100	0	0	0	1	0	0	0	1	0	0	0	0	0	0	0	0	0	0	NA	NA	NA	84.6	NA	NA	NA	223.8	NA	NA	NA	NA	NA	NA	NA	NA	NA	NA	ATNCED5|NINE-CIS-EPOXYCAROTENOID DIOXYGENASE 5|T2H7.10|T2H7_10|nine-cis-epoxycarotenoid dioxygenase 5	0	0	0
AT1G30110	1	1	1	1	1	1	1	1	1	0	1	1	0	0	0	0	1	1	169	291.1	456	411.8	247.7	241.8	222.3	408.6	98	NA	218.1	191.3	NA	NA	NA	NA	106.8	333.5	ATNUDX25|T2H7.9|T2H7_9|nudix hydrolase homolog 25	0	0	0
AT1G30120	0	0	0	0	0	0	0	1	0	0	0	0	0	0	0	0	0	0	NA	NA	NA	NA	NA	NA	NA	249.3	NA	NA	NA	NA	NA	NA	NA	NA	NA	NA	pyruvate dehydrogenase E1 beta	0	0	0
AT1G30130	0	0	1	1	0	0	0	0	0	0	0	0	0	0	0	0	1	0	NA	NA	97.5	96.2	NA	NA	NA	NA	NA	NA	NA	NA	NA	NA	NA	NA	205.9	NA	T2H7.7|T2H7_7	0	0	1
AT1G30135	0	1	1	1	1	1	0	0	1	0	0	0	0	0	0	0	0	1	NA	111.5	327.9	294.8	102.3	170.5	NA	NA	37.7	NA	NA	NA	NA	NA	NA	NA	NA	220.4	TIFY5A|jasmonate-zim-domain protein 8	0	0	0
AT1G30150	0	0	0	0	0	0	0	1	0	0	0	0	0	0	0	0	0	0	NA	NA	NA	NA	NA	NA	NA	380.9	NA	NA	NA	NA	NA	NA	NA	NA	NA	NA	T2H7.5|T2H7_5	0	0	0
AT1G30180	0	0	0	0	0	0	0	1	0	0	0	0	0	0	0	0	0	0	NA	NA	NA	NA	NA	NA	NA	325.9	NA	NA	NA	NA	NA	NA	NA	NA	NA	NA	-	0	0	0
AT1G30190	0	0	0	0	0	0	0	1	0	0	0	0	0	0	0	0	0	0	NA	NA	NA	NA	NA	NA	NA	916.1	NA	NA	NA	NA	NA	NA	NA	NA	NA	NA	T2H7.2|T2H7_2	0	0	0
AT1G30200	0	0	1	1	1	1	0	1	1	0	1	1	0	0	0	0	0	1	NA	NA	312.4	388.7	102.9	104.3	NA	100.9	98.8	NA	234.8	195.3	NA	NA	NA	NA	NA	324.2	F12P21.1|F12P21_1	0	0	1
AT1G30210	0	0	0	0	0	0	0	0	0	0	0	0	0	0	0	0	0	1	NA	NA	NA	NA	NA	NA	NA	NA	NA	NA	NA	NA	NA	NA	NA	NA	NA	123.4	ATTCP24|F12P21.11|F12P21_11|TEOSINTE BRANCHED 1|and PCF family 24|cycloidea	0	0	0
AT1G30220	0	0	0	0	0	0	0	1	0	0	0	0	0	0	0	0	0	0	NA	NA	NA	NA	NA	NA	NA	185.6	NA	NA	NA	NA	NA	NA	NA	NA	NA	NA	ARABIDOPSIS THALIANA INOSITOL TRANSPORTER 2|ATINT2|F12P21.2|F12P21_2|inositol transporter 2	0	0	0
AT1G30250	0	0	0	0	0	0	0	1	0	0	0	0	0	0	0	0	1	1	NA	NA	NA	NA	NA	NA	NA	153.9	NA	NA	NA	NA	NA	NA	NA	NA	232.4	155.9	F12P21.5|F12P21_5	0	0	0
AT1G30270	0	0	0	0	0	0	0	1	0	0	0	0	0	0	0	0	1	0	NA	NA	NA	NA	NA	NA	NA	106.4	NA	NA	NA	NA	NA	NA	NA	NA	178.3	NA	ATCIPK23|CBL-interacting protein kinase 23|F12P21.6|F12P21_6|LKS1|LOW-K+-SENSITIVE 1|PKS17|SNF1-RELATED PROTEIN KINASE 3.23|SOS2-like protein kinase 17|SnRK3.23	0	0	0
AT1G30280	1	0	0	0	0	0	1	0	0	0	0	0	0	0	0	0	0	0	230.2	NA	NA	NA	NA	NA	74.8	NA	NA	NA	NA	NA	NA	NA	NA	NA	NA	NA	F12P21.7|F12P21_7	0	0	0
AT1G30290	0	0	0	0	0	0	0	0	0	0	0	0	1	0	0	0	0	0	NA	NA	NA	NA	NA	NA	NA	NA	NA	NA	NA	NA	52.4	NA	NA	NA	NA	NA	F12P21.10|F12P21_10	0	0	0
AT1G30300	0	1	0	0	0	0	0	0	0	0	0	0	0	0	0	0	0	0	NA	108	NA	NA	NA	NA	NA	NA	NA	NA	NA	NA	NA	NA	NA	NA	NA	NA	F12P21.8|F12P21_8	0	0	0
AT1G30310	0	1	1	1	1	1	1	1	1	0	1	1	1	0	0	0	0	1	NA	140.8	296.7	295.6	110.7	128.5	61	98.4	87.5	NA	194.7	142.9	48.6	NA	NA	NA	NA	233.4	F26G16.1	0	0	0
AT1G30320	0	0	1	0	0	1	1	1	0	0	0	0	0	0	0	0	0	1	NA	NA	172.1	NA	NA	96.7	63	116.4	NA	NA	NA	NA	NA	NA	NA	NA	NA	232	T4K22.7|T4K22_7	0	0	0
AT1G30330	0	1	1	1	1	1	0	0	0	0	1	1	0	0	0	0	1	1	NA	184.6	259.2	254	126.2	186.8	NA	NA	NA	NA	296.2	256.4	NA	NA	NA	NA	224.2	353.7	T4K22.6|T4K22_6|auxin response factor 6	1	0	0
AT1G30340	0	1	1	1	1	0	0	0	0	0	0	0	0	0	0	0	0	1	NA	68.5	200.6	204.9	111.5	NA	NA	NA	NA	NA	NA	NA	NA	NA	NA	NA	NA	118.2	T4K22.10	0	0	0
AT1G30350	0	0	0	0	0	0	0	1	0	0	0	0	0	0	0	0	0	0	NA	NA	NA	NA	NA	NA	NA	166.1	NA	NA	NA	NA	NA	NA	NA	NA	NA	NA	T4K22.5|T4K22_5	0	0	0
AT1G30360	1	1	1	1	1	1	1	0	1	0	1	1	0	0	0	0	0	1	184.5	231.9	239.5	247.8	107.6	104.9	133.8	NA	113.6	NA	295.2	270.7	NA	NA	NA	NA	NA	308.1	T4K22.4|T4K22_4|early-responsive to dehydration 4	0	0	1
AT1G30370	0	0	1	1	0	0	0	1	0	0	0	0	0	0	0	0	0	0	NA	NA	248.8	212.3	NA	NA	NA	229	NA	NA	NA	NA	NA	NA	NA	NA	NA	NA	DAD1-like acylhydrolase|T4K22.3|T4K22_3	0	0	1
AT1G30400	0	0	0	0	0	0	0	1	0	0	0	0	0	0	0	0	0	0	NA	NA	NA	NA	NA	NA	NA	309.5	NA	NA	NA	NA	NA	NA	NA	NA	NA	NA	ARABIDOPSIS THALIANA MULTIDRUG RESISTANCE-ASSOCIATED PROTEIN 1|ATABCC1|ATMRP1|ATP-binding cassette C1|Arabidopsis thaliana ATP-binding cassette C1|EST1|GLUTATHIONE S-CONJUGATE TRANSPORTING ATPASE|MRP1|T4K22.12|T4K22_12|multidrug resistance-associated protein 1	0	0	0
AT1G30410	0	1	1	1	1	1	1	1	0	0	1	1	1	0	0	0	0	1	NA	98.8	187.3	168.5	96.7	129.8	68.9	193.8	NA	NA	180.1	137.6	58.1	NA	NA	NA	NA	262.9	ATMRP13|ATP-binding cassette C12|MRP13|T4K22.13|T4K22_13|multidrug resistance-associated protein 13	0	0	0
AT1G30420	0	0	0	0	0	0	0	1	0	0	0	0	0	0	0	0	0	0	NA	NA	NA	NA	NA	NA	NA	69.7	NA	NA	NA	NA	NA	NA	NA	NA	NA	NA	ATMRP12|ATP-binding cassette C11|MRP12|T4K22.1|T4K22_1|multidrug resistance-associated protein 12	0	0	0
AT1G30430	0	0	0	0	0	0	0	0	0	0	0	0	1	0	0	0	0	0	NA	NA	NA	NA	NA	NA	NA	NA	NA	NA	NA	NA	61.1	NA	NA	NA	NA	NA	51682.TRNA-GLU-1|60744.TRNA-GLU-1|AT1G30435	0	0	0
AT1G30440	0	0	0	0	0	0	0	1	0	0	0	0	0	0	0	0	1	1	NA	NA	NA	NA	NA	NA	NA	385.6	NA	NA	NA	NA	NA	NA	NA	NA	304.9	133.7	F26G16.2|F26G16_2	0	0	0
AT1G30450	0	0	0	1	0	0	0	0	0	0	0	0	0	0	0	0	0	0	NA	NA	NA	88.8	NA	NA	NA	NA	NA	NA	NA	NA	NA	NA	NA	NA	NA	NA	ATCCC1|F26G16.4|F26G16_4|HAP5|HAPLESS 5|cation-chloride co-transporter 1	0	0	0
AT1G30470	0	0	1	0	0	0	0	0	0	0	0	0	0	0	0	0	0	0	NA	NA	55.5	NA	NA	NA	NA	NA	NA	NA	NA	NA	NA	NA	NA	NA	NA	NA	F26G16.8|F26G16_8	0	0	0
AT1G30473	0	0	0	0	0	0	0	1	0	0	0	0	0	0	0	0	0	0	NA	NA	NA	NA	NA	NA	NA	244.5	NA	NA	NA	NA	NA	NA	NA	NA	NA	NA	-	0	0	0
AT1G30475	0	0	1	0	0	0	0	0	0	0	0	0	0	0	0	0	0	1	NA	NA	71.2	NA	NA	NA	NA	NA	NA	NA	NA	NA	NA	NA	NA	NA	NA	76.8	-	0	0	0
AT1G30490	0	0	0	0	0	0	0	1	0	0	0	0	0	0	0	0	0	1	NA	NA	NA	NA	NA	NA	NA	384.1	NA	NA	NA	NA	NA	NA	NA	NA	NA	147.7	ATHB9|F26G16.11|F26G16_11|PHAVOLUTA	0	0	0
[truncated: 17,479 more rows]
