# Supplementary material for: Defining in vivo transcriptional responses to auxin
Source: Research Square preprint supplement (doi:10.21203/rs.3.rs-1927085/v1), 2022-08-11
Supplement: Supplementary file 2 [file 0c332087ce0f7088d2558238.xlsx]

## Sheet: Sheet1
Supplementary Data 2 ChIP-seq Motif with p-value
ARF5(MP)_DEX	E-value
	3.4e-24
	5.2e-20
	2.2e-19
	7.4e-19
	5.1e-11
ARF5(MP)_DEX_IAA
	7.9e-40
	2e-13
	4.4e-08
ARF5(MP)∆PB1_DEX
	9.5e-21
	5.6e-15
	6e-10
ARF5(MP)∆PB1_DEX_IAA
	7.3e-47
	2e-15
	1.1e-10
	3.4e-08
ARF6 (REF )
	1.9e-87
	1.6e-26
	9.1e-22
ARF7_Dex
	5.9e-22
	3.2e-17
ARF10_DEX
	7.8e-63
	2.9e-22
	3.3e-08
ARF10_DEX_IAA
	6.6e-25
	2.5e-19
	6.6e-10
IAA19(msg)mARF10_DEX
	4.4e-31
	2.1e-26
	3.6e-10
IAA19(msg)mARF10_DEX_IAA
	1.1e-37
	3.7e-14
IAA19Ypet
	3.3e-70
	2.6e-50
	2.7e-34
	9.2e-30
IAA19(msg)_DEX
	2.6e-39
	2.6e-34
	5e-21
IAA12(bdl)_DEX
	3.8e-16
	5e-21
	1.1e-11
	1.2e-12
TCP
	3.9E-580
	3.2e-35
